# Supplementary material for: Addressing the under-reporting of adverse drug reactions in public health programs controlling HIV/AIDS, Tuberculosis and Malaria: A prospective cohort study
Source: PLoS One. 2018 Aug 22;13(8):e0200810. doi: 10.1371/journal.pone.0200810 (PMC6104922; doi:10.1371/journal.pone.0200810)
Supplement: S1 Dataset — (XLSX) [file pone.0200810.s006.xlsx]

## Sheet: Sheet1
				SPHARTI'S PARTICIPANTS
Gender	Age (In Years)	Current Profession	Computer Literacy	Have you ever attended a Pharmacovigilance training or course?	Have you ever completed the NAFDAC Yellow Form in the course of your work?	If YES, how many Forms do you complete in a week?	Which of the public health programs is your health facility providing?	How many patients are you treating or involved in the treatment daily?	How many patients do you or are you involved in treatment in a day?	How long have you been practicing your profession?
Male	26	Nursing	Proficient	No	No		DOTs for Tuberculosis	Above ten	Above ten	two years
Male	55	Medicine	Intermediate	No			MDRTB for Multi-drug resistant Tuberculosis			17 years
Female	46	Pharmacy	Proficient	Yes	Yes	MAY BE 1 OR 2 IN A YEAR	Anti-retroviral Therapy for HIV/AIDS	OVER 500	50 -100	13 YEARS
Female	54 YEARS	Medicine	Proficient	No	Yes	ONE	DOTs for Tuberculosis	2018-08-10	2018-08-10	31 YEARS
Female	26 YEARS	Pharmacy	Proficient	No	Yes	1	Anti-retroviral Therapy for HIV/AIDS			4 YEARS
Female	40	Nursing	Intermediate	No	No		Roll-back Malaria for Malaria	3	3	7years 5months
Male	34	Medicine	Proficient	No	No		MDRTB for Multi-drug resistant Tuberculosis	58	58	6 Years
Male	26	Pharmacy	Intermediate	No	No		Anti-retroviral Therapy for HIV/AIDS			3 years
Female	41	Nursing	Proficient	No	No		MDRTB for Multi-drug resistant Tuberculosis	25	25	FIFTEEN YEARS
Male	32	Medicine	Proficient	No	Yes	2	Anti-retroviral Therapy for HIV/AIDS	55	20	3 years
Male	45	Nursing	Proficient	No			Roll-back Malaria for Malaria	It depends on monthly reports from the LGAs in Oyo State	It depends on data submitted by the PHC	16 years
Male	49	Medicine	Proficient	Yes	Yes	Did it just once	DOTs for Tuberculosis	30	30	25 years.
Female	25 years	Pharmacy	Intermediate	Yes	No		Roll-back Malaria for Malaria	We did step down training.we trained other community health workers to carry out the treatment while we supervised.		One year internship training
Female	28	Medicine	Proficient	No	No		Anti-retroviral Therapy for HIV/AIDS	10	10	4 Years
Male	30	Pharmacy	Proficient	No	No		Roll-back Malaria for Malaria			3 YEARS
Male	27	Nursing	Proficient	No	No		Anti-retroviral Therapy for HIV/AIDS	2018-10-15	2018-10-15	4 years
Male	31	Medicine	Proficient	No			Anti-retroviral Therapy for HIV/AIDS	Thirty	Twenty	Four years
Male	35	Medicine	Proficient	No		1	Anti-retroviral Therapy for HIV/AIDS	30	30	9 Years.
Male	78	Medicine	Proficient	No	No		DOTs for Tuberculosis	65	60	67
Male	34	Nursing	Beginner	No	No		Anti-retroviral Therapy for HIV/AIDS	120	50	10 Years
Male	34years	Medicine	Proficient	No	No		Anti-retroviral Therapy for HIV/AIDS	FIVE	FIVE	SEVEN YEARS
Male	33 years	Medicine	Proficient	Yes	Yes	Not frequently	Roll-back Malaria for Malaria	30	30	6years
Female	35	Nursing	Intermediate	No	No		Anti-retroviral Therapy for HIV/AIDS			6 years
Female	58	Nursing	Proficient	No	No		Anti-retroviral Therapy for HIV/AIDS	Average of 150		39years
Female	35	Medicine	Proficient	No	Yes	1-2 (while at LUTH)	Anti-retroviral Therapy for HIV/AIDS	2018-10-12		11years
Female	29	Medicine	Intermediate	Yes	No		Roll-back Malaria for Malaria	25	25	3yrs
Male	41years	Nursing	Proficient	No	No		Anti-retroviral Therapy for HIV/AIDS	25	10	17 years
Female	54	Nursing	Intermediate	No	No		Roll-back Malaria for Malaria	10	10	23 years
Male	32	Medicine	Intermediate	No	No		Anti-retroviral Therapy for HIV/AIDS	15	5	3 years
Female	29	Pharmacy	Proficient	Yes	Yes	One	Anti-retroviral Therapy for HIV/AIDS			Two years
Male	45	Pharmacy	Proficient	Yes	Yes	then 10	Anti-retroviral Therapy for HIV/AIDS	over 30	over 30	16 years
Male	30	Medicine	Proficient	No	Yes	1 bi monthly	Anti-retroviral Therapy for HIV/AIDS	100	100	4 years
Male	THIRTY ONE	Pharmacy	Proficient	No	No		Anti-retroviral Therapy for HIV/AIDS	TWO	TWO	SIX YEARS
Male	29	Pharmacy	Proficient	No	Yes	one	Anti-retroviral Therapy for HIV/AIDS	About 2000	About 50	5 years
Female	44	Pharmacy	Proficient	No	Yes	1	Anti-retroviral Therapy for HIV/AIDS	120	50	15 years
Male	24	Pharmacy	Proficient	No			Anti-retroviral Therapy for HIV/AIDS	100	150	2 years
Male	45	Pharmacy	Proficient	No	Yes	1	Anti-retroviral Therapy for HIV/AIDS	40-50 Per Clinic ( Clinic is twice weekly)	40-50 Per Clinic ( Clinic is twice weekly)	15 Years
Male	29	Medicine	Proficient	No	No		Roll-back Malaria for Malaria	at least 20	at least 20	5 years
Male	50	Medicine	Proficient	No	No		Anti-retroviral Therapy for HIV/AIDS	20	20	25 years
Female	27 years old	Nursing	Intermediate	No	No		Roll-back Malaria for Malaria	10	7	2YEARS
Male	29	Pharmacy	Proficient	No	Yes	2	Anti-retroviral Therapy for HIV/AIDS	100 (400 weekly)	100	3 years
Male	46 years	Pharmacy	Proficient	No	Yes	Average of 2	MDRTB for Multi-drug resistant Tuberculosis	18	18	18 years
Male	48 Years	Pharmacy	Proficient	Yes	Yes	As the need arises.	Anti-retroviral Therapy for HIV/AIDS	10 patients	2-3 patients	25 Years
Female	29	Nursing	Intermediate	No	No		Roll-back Malaria for Malaria	18	18	8 YEARS
Female	40YEARS	Nursing	Proficient	No	No		Roll-back Malaria for Malaria	15	10	6years
Male	44 years	Pharmacy	Proficient	No	Yes	average of one in two weeks	Anti-retroviral Therapy for HIV/AIDS	Average of fifteen daily	fifteen	Seventeen years
Male	31 Years	Pharmacy	Proficient	No	No		Anti-retroviral Therapy for HIV/AIDS	10 patients	10 patients	3 years
Male	35	Pharmacy	Proficient	Yes			DOTs for Tuberculosis	average of 45	minimum of 30	4years
Female	1978	Nursing	Beginner	No	Yes	two	DOTs for Tuberculosis	200	about 150	About 17 years
Male	41	Pharmacy	Proficient	No	Yes	ONE	Anti-retroviral Therapy for HIV/AIDS	30	30	15 YEARS
Male	34	Medicine	Intermediate	No	No		DOTs for Tuberculosis	15	15	5YEARS
Male	51	Pharmacy	Intermediate	No	No		Anti-retroviral Therapy for HIV/AIDS			27 years
Female	33years	Pharmacy	Intermediate	No	No		Anti-retroviral Therapy for HIV/AIDS	35 people	35 people	8 years
Male	25 YEARS	Pharmacy	Proficient	No	No		Anti-retroviral Therapy for HIV/AIDS	35 people	35 people	6 years
Female	50	Nursing	Intermediate	No	No		Anti-retroviral Therapy for HIV/AIDS	250	50	12 YEARS
Male	31	Pharmacy	Proficient	No	No		Anti-retroviral Therapy for HIV/AIDS	100	15-20	7 Years
Male	1972	Nursing	Beginner	No	No	Nil	Roll-back Malaria for Malaria	10 above	10	10years
Female	25	Pharmacy	Proficient	Yes			Roll-back Malaria for Malaria			3 years
Female	25	Nursing	Intermediate	Yes	No		Anti-retroviral Therapy for HIV/AIDS	5	5	5
Male	30yrs	Medicine	Proficient	No	No		Anti-retroviral Therapy for HIV/AIDS	6	6	5yrs
Male	32	Medicine	Proficient	Yes	No		Anti-retroviral Therapy for HIV/AIDS	10	10	8 years
Male	40	Pharmacy	Proficient	Yes	No		Anti-retroviral Therapy for HIV/AIDS	11	11	9 Years
Male	35	Medicine	Proficient	No	Yes	none on most weeks	DOTs for Tuberculosis	10	10	10
Male	36	Medicine	Proficient	No	No		Roll-back Malaria for Malaria	30 - 35	30 - 35	7 years
Male	32	Pharmacy	Proficient	No	Yes	ATLEAST 10	Anti-retroviral Therapy for HIV/AIDS	ATLEAST 30	ATLEAST 30	FOUR (4) YEARS
Female	30	Nursing	Proficient	No	No		Roll-back Malaria for Malaria	60	15	5 years
Male	49 YEARS	Pharmacy	Intermediate	Yes	Yes		Anti-retroviral Therapy for HIV/AIDS	250 on the average	250 on the average	23 YEARS
Male	31 years	Pharmacy	Proficient	Yes	No	0	Roll-back Malaria for Malaria	nil	il	4 years
Male	29 YEARS	Pharmacy	Proficient	No	Yes	3	Roll-back Malaria for Malaria			5 Years
Female	28	Nursing	Intermediate	Yes	No	None	Roll-back Malaria for Malaria	2018-04-07	2018-04-07	Two(2) years and Four(4) months.
Male	47 years	Pharmacy	Beginner	No	No		Anti-retroviral Therapy for HIV/AIDS	5	5	24 years
Female	31	Pharmacy	Proficient	Yes	Yes		Roll-back Malaria for Malaria	Hundreds	Hundreds	2013-Till date
Male	25	Pharmacy	Proficient	No	No		Anti-retroviral Therapy for HIV/AIDS	15	15	3 years
Female	43YEARS	Pharmacy	Proficient	Yes	Yes	MORE THAN 3 FORMS DEPENDING ON THE NUMBER OF PATIENTS SEEN	Anti-retroviral Therapy for HIV/AIDS	OVER 2000 CLIENTS	ON CLINIC DAY IS ABOUT 300 CLIENTS	15YEARS
Male	49	Pharmacy	Intermediate	No	Yes	TWO	Anti-retroviral Therapy for HIV/AIDS	TWELVE	TWELVE	TWENTY FOUR YEARS
Male	37	Pharmacy	Proficient	Yes	Yes	it depends on the nature of the ADR in the facility ranging from 3-4	MDRTB for Multi-drug resistant Tuberculosis	2018-10-12	2018-10-12	9-10yrs
Female	39	Pharmacy	Intermediate	No	No		Roll-back Malaria for Malaria	15-20	15-20	17 YEARS
Male	47	Pharmacy	Intermediate	No	Yes	Not more than One	Anti-retroviral Therapy for HIV/AIDS	About 100 daily	About 100	17 years
Male	28/01/1986	Nursing	Intermediate	Yes	No	nil	Roll-back Malaria for Malaria	25	2018-10-15	3 years
Female	43 years	Pharmacy	Intermediate	No	Yes	not weekly	Anti-retroviral Therapy for HIV/AIDS	average of 80	average of 80	18 years
Female	46 YEARS	Pharmacy	Intermediate	Yes	Yes	Average of 2	Anti-retroviral Therapy for HIV/AIDS	Average of 120 patients per clinic day	Average of 75 patients per clinic day	18 years
Male	28	Pharmacy	Intermediate	No	Yes	At least one form weekly	Anti-retroviral Therapy for HIV/AIDS	20	20	3 years 3 months
Female	34	Medicine	Proficient	Yes	Yes	1	Anti-retroviral Therapy for HIV/AIDS			6 years
Male	34 years	Pharmacy	Intermediate	Yes	No		Anti-retroviral Therapy for HIV/AIDS	20 patients	20 patients	Seven(7) years
Male	25	Nursing	Intermediate	Yes	No		Roll-back Malaria for Malaria	25	20	2 YEARS
Female	36 YEARS	Pharmacy	Proficient	Yes	No		Anti-retroviral Therapy for HIV/AIDS	ABOUT 25	ABOUT 25	ABOUT 8 YEARS
Female	34	Medicine	Proficient	No	No		Anti-retroviral Therapy for HIV/AIDS	30	30	7 years
Male	32 YEARS	Medicine	Proficient	No	No		Anti-retroviral Therapy for HIV/AIDS	2018-04-06	2018-04-06	5years
Male	28	Nursing	Intermediate	No	No		Roll-back Malaria for Malaria	2018-01-17	17	4yrs
Male	30	Medicine	Proficient	No	No		DOTs for Tuberculosis	150	10	4 YEARS
Male	29	Medicine	Intermediate	No	No		Anti-retroviral Therapy for HIV/AIDS			4 years
Male	42 YEARS	Nursing	Intermediate	No	No		Roll-back Malaria for Malaria	APPROX,30 PATIENTS DAILY	30 PER DAY	17 YEARS NOW
Male	31	Medicine	Intermediate	No	Yes	2	Anti-retroviral Therapy for HIV/AIDS	Forty patients	forty	5 years
Male	41	Pharmacy	Proficient	Yes	Yes	NOT VERY REGULAR IN FILLING	Anti-retroviral Therapy for HIV/AIDS	200 - 300 ON THE AVERAGE	80 ON THE AVERAGE	15 YEARS NOW
Male	30 Years	Nursing	Beginner	Yes	No		Roll-back Malaria for Malaria	30-40	2018-10-15	3 years
Male	36YEARS	Medicine	Intermediate	No		nil	Anti-retroviral Therapy for HIV/AIDS	about 30-50	30-50	7 years
Female	33 YEARS	Medicine	Intermediate	No	No		DOTs for Tuberculosis			SIX YEARS
Female	45	Pharmacy	Proficient	Yes	Yes	Once in a while	Roll-back Malaria for Malaria	500	500	14 years
Male	35years	Medicine	Proficient	No	Yes	One	DOTs for Tuberculosis	2018-10-15	2018-10-15	7 years
Male	56	Pharmacy	Intermediate	No	No		Anti-retroviral Therapy for HIV/AIDS	0	0	10
Female	42 years	Pharmacy	Proficient	No	Yes	Weekly documentation of Adverse Drug Reaction cannot be predicted because only severe reactions are reported.	Anti-retroviral Therapy for HIV/AIDS	Current job schedule is Drug Information Services and Pharmacovigilance.	I am involved in treating over 50 patients when I am on call but i coordinate and carry out pharmacovilgilance rounds daily at different wards and clinics (GOPD, EPU, IPP, ICU etc), take drug history of In-patients, allergies, correlate with presenting symptoms, available laboratory data, plan and discuss with team managing the case. I review about 3 suspected cases a day (as time permits) and fo…	15 years
Male	31	Medicine	Proficient	No	Yes	3	Anti-retroviral Therapy for HIV/AIDS	40	70	4 years
Male	FIFTY YEARS	Pharmacy	Intermediate	Yes	Yes	TWO, DEPENDING ON THE NUMBER OF ADVERSE DRUG REACTION OCCURENCE	MDRTB for Multi-drug resistant Tuberculosis	30, DEPENDING ON THE NUMBER OF COHORT AT A TIME	THE COHORTS ARE TREATED DAILY	SEVENTEEN YEARS
Female	42	Nursing	Proficient	No			DOTs for Tuberculosis	20	20	22YEARS
Female	37 years	Nursing	Proficient	No	No		MDRTB for Multi-drug resistant Tuberculosis	Presently 10 patients.Admission still in progress	Presently 10 patients.Admission still in progress	9years
Male	29yrs old	Nursing	Proficient	No	No		Anti-retroviral Therapy for HIV/AIDS	2 to 3	2018-02-03	4yrs
Male	29	Pharmacy	Proficient	No	Yes	One	Roll-back Malaria for Malaria	50	15	2 years
Male	25 years	Pharmacy	Proficient	Yes	No		MDRTB for Multi-drug resistant Tuberculosis	15 patients	5 patients	one year
Male	44 YEARS	Pharmacy	Proficient	Yes	Yes	2	Anti-retroviral Therapy for HIV/AIDS	30	30	15 years
Male	33	Medicine	Proficient	No	No		Anti-retroviral Therapy for HIV/AIDS	80	80	5 Years
Female	28	Nursing	Proficient	No			Roll-back Malaria for Malaria	10 PATIENTS	10 PATIENTS	3 YEARS
Male	34	Pharmacy	Proficient	Yes	Yes	1	Anti-retroviral Therapy for HIV/AIDS	25	25	9 years
Male	33 YEARS	Medicine	Intermediate	Yes	Yes	ONE	Roll-back Malaria for Malaria	15 - 20	15 - 20	5 YEARS
Male	34	Pharmacy	Proficient	Yes	Yes	one	Anti-retroviral Therapy for HIV/AIDS	25	25 minimum	nine years
Male	29	Medicine	Proficient	Yes	No		Anti-retroviral Therapy for HIV/AIDS	20	20	6 years
Female	40	Nursing	Intermediate	Yes	Yes	Two (2)	Anti-retroviral Therapy for HIV/AIDS	11	5	11 years
Male	26	Nursing	Intermediate	No			DOTs for Tuberculosis	40	40	One year
Female	41	Pharmacy	Intermediate	Yes	Yes	just once	Roll-back Malaria for Malaria	average of 5to10 patients	5 patients	15 years ago
Female	26	Nursing	Intermediate	No			Anti-retroviral Therapy for HIV/AIDS	10	10	6years
Female	34	Medicine	Intermediate	No	No		Anti-retroviral Therapy for HIV/AIDS	22	22	7 Years
Female	34	Medicine	Intermediate	No	No		Anti-retroviral Therapy for HIV/AIDS	24	24	5 Years
Male	50	Pharmacy	Intermediate	No	Yes	1	Anti-retroviral Therapy for HIV/AIDS	40	40	19
Male	46 YEARS	Pharmacy	Proficient	Yes	No		Anti-retroviral Therapy for HIV/AIDS	24	20	16 YEARS
Male	46	Medicine	Intermediate	No	No		Anti-retroviral Therapy for HIV/AIDS	4	4	26
Female	37yesrs	Nursing	Intermediate	No			Anti-retroviral Therapy for HIV/AIDS	@ least five patients	@ least five patients	eleven years
Female	30	Pharmacy	Proficient	No	No		Anti-retroviral Therapy for HIV/AIDS	40-50	40-50	6 years
Male	33	Medicine	Proficient	No	No		Anti-retroviral Therapy for HIV/AIDS	average of 20	average of 20	one year four months
Male	59	Nursing	Proficient	No	No		Anti-retroviral Therapy for HIV/AIDS	70-100	70-100	35 years
Male	44	Pharmacy	Intermediate	Yes	Yes	During the training on pharmacovigilance	Roll-back Malaria for Malaria	An average of twenty five (25)	An average of twenty five (25)	16 years
Female	39	Pharmacy	Proficient	No	No		Anti-retroviral Therapy for HIV/AIDS	200	200	6 years
Female	56	Nursing	Beginner	No	No		Roll-back Malaria for Malaria	12 A DAY	12 DAILY	35 YEARS
Female	53 years	Nursing	Proficient	No			MDRTB for Multi-drug resistant Tuberculosis	2	2	30 years
Male	48	Pharmacy	Proficient	No	Yes	1	Anti-retroviral Therapy for HIV/AIDS	50	50	26 years
Male	41	Pharmacy	Intermediate	No	No		Anti-retroviral Therapy for HIV/AIDS	4	4	11 YEARS
Male	27	Pharmacy	Proficient	Yes	No		Anti-retroviral Therapy for HIV/AIDS	50 - 150	50	2 years
Male	38	Nursing	Proficient	No	No		Anti-retroviral Therapy for HIV/AIDS	30-50	30-50	13years
Female	28years
Female	30	Pharmacy	Intermediate	Yes	No		Anti-retroviral Therapy for HIV/AIDS	40-50	40-50	FIVE(5) YEARS
Female	33 Years	Pharmacy	Proficient	No	Yes	1	Anti-retroviral Therapy for HIV/AIDS	40+	40+	10 Years
Female	29	Nursing	Intermediate	No	No		Anti-retroviral Therapy for HIV/AIDS			Over 5 years
Male	37	Pharmacy	Proficient	No	No		Roll-back Malaria for Malaria	15-20 patients		12 years
Male	33	Medicine	Proficient	No	No		Anti-retroviral Therapy for HIV/AIDS	Average of 20	Average of 20	4years
Female	46	Pharmacy	Proficient	Yes	No	none	Anti-retroviral Therapy for HIV/AIDS	40	40	16 years
Male	56	Pharmacy	Proficient	No	Yes	1	MDRTB for Multi-drug resistant Tuberculosis	Oversee 25 patients per intensive phase of treatment of 8 months up till end of 2015; which has now been adjusted to 4 months per intensive phase within our treatment centre	Same number of patients as above stated	From 1985 till date
Female	45	Nursing	Intermediate	No	No		DOTs for Tuberculosis	50-100	50	12 YEARS
Female	30	Medicine	Proficient	No	Yes	1	Anti-retroviral Therapy for HIV/AIDS	20	20	2years
Female	29YEARS	Nursing	Proficient	Yes	No		Roll-back Malaria for Malaria	ABOUT 10	ABOUT 10	8YEARS
Female	28years	Nursing	Proficient	Yes	Yes	2	Anti-retroviral Therapy for HIV/AIDS	60	48	5years
Male	32	Nursing	Proficient	No			Anti-retroviral Therapy for HIV/AIDS	14	14	5 years
Male	30years	Medicine	Proficient	No	No		DOTs for Tuberculosis	20	20	2years
Female	31YEARS	Nursing	Proficient	Yes	No		Anti-retroviral Therapy for HIV/AIDS	15	15	9YEARS
Female	61years	Nursing	Intermediate	No	No		MDRTB for Multi-drug resistant Tuberculosis	20 Patients	20 Patients	36 Years
Female	32	Medicine	Proficient	No	Yes	24	Anti-retroviral Therapy for HIV/AIDS	25	25	5
Male	35	Medicine	Proficient	No	Yes	On a needs basis based on ADRs identified but average of 2 per week	Anti-retroviral Therapy for HIV/AIDS	In FHI all supported sites in Rivers State, I have 17, 902 patiently current on ART	On a daily basis, an average of 57 new ART cases per day	11 years
Male	41years	Pharmacy	Proficient	No	Yes	11	Anti-retroviral Therapy for HIV/AIDS	20	20	12years
Female	58 Year old	Nursing	Beginner	No	Yes	three times in a week	MDRTB for Multi-drug resistant Tuberculosis	17 patients	17 patients	33 years ago
Male	36	Pharmacy	Intermediate	No	Yes	AVERAGE OF ONE FORM	Anti-retroviral Therapy for HIV/AIDS	AVERAGE OF TEN PATIENTS DAILY	AVERAGE OF TEN PATIENTS IN A DAY	7 YEARS
Male	35	Medicine	Intermediate	No	No		Anti-retroviral Therapy for HIV/AIDS	10	10	seven years
Male	44 years	Medicine	Proficient	No	No		Anti-retroviral Therapy for HIV/AIDS	15	10	15 years
Female	38	Pharmacy	Intermediate	Yes	Yes		Anti-retroviral Therapy for HIV/AIDS	170	170	14 years
Female	43	Nursing	Proficient	No	No		Anti-retroviral Therapy for HIV/AIDS	50 - 75	50	2001
Male	30	Medicine	Proficient	No	No		Anti-retroviral Therapy for HIV/AIDS	50	2018-06-07	4 years
Male	35YEARS	Nursing	Intermediate	No			Roll-back Malaria for Malaria	15PATIENTS	15 PATIENTS	5YEARS
Female	46 YEARS	Nursing	Intermediate	No	No		Anti-retroviral Therapy for HIV/AIDS	50 PATIENTS AND ABOVE	10 PATIENTS AND ABOVE	25 YEARS OF PRACTICING
Female	39	Pharmacy	Proficient	No			Anti-retroviral Therapy for HIV/AIDS	200	200	6years
Female	36years	Pharmacy	Proficient	No	No		Anti-retroviral Therapy for HIV/AIDS	16	16	10years
Male	27	Medicine	Proficient	Yes	Yes	3	Anti-retroviral Therapy for HIV/AIDS	30	30	3
Male	39	Pharmacy	Intermediate	No	Yes	1	Anti-retroviral Therapy for HIV/AIDS	2000	50	10
Male	29	Medicine	Proficient	No	No		Roll-back Malaria for Malaria	10	10	3 years
Female	41	Pharmacy	Intermediate	No	No		Anti-retroviral Therapy for HIV/AIDS	10	10	17 Years
Male	32	Medicine	Proficient	No	No		DOTs for Tuberculosis	50	about 50	6 years
Male	26	Nursing	Proficient	No	No		Anti-retroviral Therapy for HIV/AIDS	261	18	3
Male	25	Medicine	Proficient	No			Anti-retroviral Therapy for HIV/AIDS	5 - 10 patients	5 - 10 patients	about one and half years
Male	37	Medicine	Intermediate	No	No		Roll-back Malaria for Malaria	20 and above	20 and above	5 years
Female	25	Pharmacy	Proficient	Yes	No		Roll-back Malaria for Malaria	2018-06-10	2018-06-10	2 years
Female	30	Medicine	Proficient	No	No		Anti-retroviral Therapy for HIV/AIDS	6	6	4 years
Male	33 Years	Nursing	Proficient	No	No		Anti-retroviral Therapy for HIV/AIDS	200 - 250.	20 - 30.	3 Years.
Male	35	Pharmacy	Proficient	No	No		Anti-retroviral Therapy for HIV/AIDS			9 years
Male	33	Medicine	Proficient	No	No		MDRTB for Multi-drug resistant Tuberculosis	12	12	4 years
Male	42	Pharmacy	Proficient	No	Yes	one	Anti-retroviral Therapy for HIV/AIDS	10	10	14 years
Male	36	Pharmacy	Proficient	Yes	Yes	It depends on patients ability to come to the pharmacy to reprt any uncomfortable response they experienced when they used a drug but on the average about '3' per week	DOTs for Tuberculosis	About 15-20 patients every week.It is a weekly programme in my health facility and the majority of the patients that come for the weekly clinic(every thursday of the week) are being treated for the Extra-pulmonary tuberculosis, However we have some few pulmonary tuberculosis patients once in a while	Nearly all the 15-20 patients that come for the clinic every week	14years
Female	40	Medicine	Proficient	Yes	No		Anti-retroviral Therapy for HIV/AIDS	I am involved with the direct mentoring of facility staff who in turn attend to clients directly.	Hardly. I only fill facility gaps when the staff have challenges.	over 7years
Male	38	Nursing	Intermediate	No	Yes	2	Anti-retroviral Therapy for HIV/AIDS	100	100	NINE (9) YEARS
Male	44	Pharmacy	Proficient	No	Yes	Not regular	Anti-retroviral Therapy for HIV/AIDS	160	160	16
Male	51 YEARS	Nursing	Intermediate	No	No		Roll-back Malaria for Malaria	50-60 PATIENTS	25 PATIENTS	25 YEARS
Male	41	Pharmacy	Intermediate	No	Yes	once in about 3 month	Anti-retroviral Therapy for HIV/AIDS		We dispense antiretroviral drugs to average of 50 patients on Clinic days	6 years
Male	31	Medicine	Intermediate	No	No		Anti-retroviral Therapy for HIV/AIDS	25	25	5
Male	1984	Medicine	Proficient	No	No		MDRTB for Multi-drug resistant Tuberculosis	Non	non	2 years
Female	56	Pharmacy	Intermediate	Yes	Yes	oonce in a while	Anti-retroviral Therapy for HIV/AIDS	50	30	26 years
Male	28/10/1985	Pharmacy	Proficient	Yes	No		Anti-retroviral Therapy for HIV/AIDS	Average 6	average 6	3 years
Male	38	Pharmacy	Proficient	No	Yes	5	Anti-retroviral Therapy for HIV/AIDS	Twice a week clinics with about 80 patients each.	Twice a week clinics with about 80 patients each.	7 years
Male	31yrs	Medicine	Intermediate	No	No		Roll-back Malaria for Malaria	25	25	4yrs
Female	42	Pharmacy	Proficient	No	Yes	Not regular	Anti-retroviral Therapy for HIV/AIDS	150	150	10 years
Male	32	Pharmacy	Intermediate	No	No	-	Anti-retroviral Therapy for HIV/AIDS	12	12	4
Female	27 Years	Pharmacy	Intermediate	No	No		DOTs for Tuberculosis	About 20	About 20	1 Year
Female	29	Nursing	Proficient	No			Anti-retroviral Therapy for HIV/AIDS	10	10	9years
Female	30	Pharmacy	Intermediate	No	No		Anti-retroviral Therapy for HIV/AIDS			4
Male	38 years	Pharmacy	Proficient	No	Yes	0ne	Anti-retroviral Therapy for HIV/AIDS	15	15	11 years
Female	41	Nursing	Proficient	No	Yes	two	Anti-retroviral Therapy for HIV/AIDS	40-50	40-50	15 years
Male	42	Pharmacy	Proficient	No	Yes	1	Anti-retroviral Therapy for HIV/AIDS	50	50	15
Female	37	Pharmacy	Proficient	No	No		Anti-retroviral Therapy for HIV/AIDS	3	2	12YEARS
Male	33 years	Pharmacy	Proficient	No	No		Anti-retroviral Therapy for HIV/AIDS	20 patient minimum	20 patients minimum	5 years
Male	32	Pharmacy	Proficient	No	No		Anti-retroviral Therapy for HIV/AIDS			5 years
Male	32	Pharmacy	Proficient	No	Yes	atleast two	Anti-retroviral Therapy for HIV/AIDS			six years (6yrs)
Female	40years	Pharmacy	Intermediate	No	Yes	Sometimes one	Anti-retroviral Therapy for HIV/AIDS	Thirty patients daily	An average of 30 patients in a day.	7 years.
Male	33	Medicine	Intermediate	No	Yes	10	Anti-retroviral Therapy for HIV/AIDS	500	400	5 years
Female	45years	Pharmacy	Proficient	No	Yes	I provided Technical Assistance to the facility parmacist	Anti-retroviral Therapy for HIV/AIDS			16years
Male	34	Pharmacy	Proficient	Yes	Yes	2018-01-02	Anti-retroviral Therapy for HIV/AIDS	12	12	12 YEARS
Male	32	Medicine	Proficient	No	No		DOTs for Tuberculosis	5	5	6
Male	43	Pharmacy	Intermediate	No	Yes	Nil	Anti-retroviral Therapy for HIV/AIDS	About 70	About 45	14 Years
Female	49	Pharmacy	Intermediate	No		ONCE IN 3 MONTHS	Anti-retroviral Therapy for HIV/AIDS	200	20	25 YEARS
Male	33	Medicine	Intermediate	No	No		Anti-retroviral Therapy for HIV/AIDS	40	40	4 years
Female	40	Nursing	Intermediate	No	No		Anti-retroviral Therapy for HIV/AIDS	50 - 100	50 - 100	15 years
Female	54	Nursing	Beginner	No	No		Anti-retroviral Therapy for HIV/AIDS	15	15	31 years
Female	29	Pharmacy	Proficient	No	No		Roll-back Malaria for Malaria	10-15 patients	4- 5 patients	5 years
Female	31	Pharmacy	Proficient	No	Yes		Anti-retroviral Therapy for HIV/AIDS	30	30	8 years
Female	37	Pharmacy	Proficient	Yes	Yes	between 3-5 forms	MDRTB for Multi-drug resistant Tuberculosis	56 -70	30 - 40 Patients	3 years
Female	33	Pharmacy	Intermediate	Yes	Yes	APPROXIMATELY 30	Anti-retroviral Therapy for HIV/AIDS	APPROXIAMTELY 80 ON TWO CLINIC DAYS IN A WEEK		8 YEARS
Male	37	Medicine	Intermediate	No	No		Anti-retroviral Therapy for HIV/AIDS	30	30	7 Years
Female	37	Pharmacy	Proficient	Yes	Yes	5	DOTs for Tuberculosis	30	30	12years
Female	40years	Nursing	Proficient	Yes	Yes	2	Anti-retroviral Therapy for HIV/AIDS	40	30	11
Female	44 years	Pharmacy	Proficient	No	Yes	1	Anti-retroviral Therapy for HIV/AIDS	25	25	21years
Female	46	Nursing	Beginner	No	No		Roll-back Malaria for Malaria	50	50	24 YEARS
Male	35	Medicine	Proficient	No	No		Anti-retroviral Therapy for HIV/AIDS	10	15	8
Male	49	Pharmacy	Proficient	No	Yes		Anti-retroviral Therapy for HIV/AIDS	30		16 years
Female	30	Pharmacy	Proficient	No	No		Anti-retroviral Therapy for HIV/AIDS			5 years
Male	33Years	Medicine	Proficient	No	No		Anti-retroviral Therapy for HIV/AIDS	30	20	2years
Female	33	Pharmacy	Proficient	Yes	No		Roll-back Malaria for Malaria	30	30	8 YEARS
Male	33	Pharmacy	Proficient	No	Yes	It depends	Anti-retroviral Therapy for HIV/AIDS	150	150	7 years
Male	48 Years	Pharmacy	Proficient	Yes	Yes	Forms are not completed on a regular basis.	Anti-retroviral Therapy for HIV/AIDS	An Average of 60 per week.	Not involved on a daily basis.	20 years
Male	48	Pharmacy	Proficient	No	Yes	Cannot specify	Anti-retroviral Therapy for HIV/AIDS	60	60	26 years
Male	29	Pharmacy	Proficient	No	Yes	6	Anti-retroviral Therapy for HIV/AIDS	150 daily for three clinics days weekly	150 daily for three clinics days weekly	3 years
Male	47	Pharmacy	Intermediate	Yes	Yes	1	Anti-retroviral Therapy for HIV/AIDS	20	20	19years
Male	29	Pharmacy	Intermediate	No	Yes	1	Anti-retroviral Therapy for HIV/AIDS	over 20	over 20	2 years
Female	34 years	Pharmacy	Intermediate	No	Yes	One	Anti-retroviral Therapy for HIV/AIDS	25	15	10 years
Male	30	Medicine	Intermediate	No	No		Anti-retroviral Therapy for HIV/AIDS	5000	200	3
Male	48 years	Medicine	Proficient	No	Yes	Two	Anti-retroviral Therapy for HIV/AIDS	Between 80 and 150 patients daily	In the range of 10 to 20 patients per day	15 years plus
Male	53	Pharmacy	Intermediate	No	No	NONE	Anti-retroviral Therapy for HIV/AIDS	50 PATIENTS	50 PATIENTS	24 YEARS
Male	35	Pharmacy	Proficient	No	Yes	one	Anti-retroviral Therapy for HIV/AIDS	minimum of 50 patients daily	minimum of 50 patients daily	5 years
Female	31 years	Nursing	Proficient	No	No		DOTs for Tuberculosis	5	5	7 years
Female	28	Nursing	Intermediate	No			Anti-retroviral Therapy for HIV/AIDS			2 years
Female	29	Pharmacy	Intermediate	No	No		Anti-retroviral Therapy for HIV/AIDS	50	50	5
Male	49	Pharmacy	Intermediate	No	No		Anti-retroviral Therapy for HIV/AIDS			18 years
Female	19/12/1963	Nursing	Beginner	No	No		Anti-retroviral Therapy for HIV/AIDS	30	30	25 YEARS
Male	37	Medicine	Proficient	Yes	Yes	1	DOTs for Tuberculosis	62	62	12 years
Male	30 YEARS	Pharmacy	Proficient	No	No		Anti-retroviral Therapy for HIV/AIDS	30	30	4 YEARS
Male	36	Medicine	Proficient	No	Yes	5	Anti-retroviral Therapy for HIV/AIDS	5	5	6 years
