# Supplementary material for: Addressing the under-reporting of adverse drug reactions in public health programs controlling HIV/AIDS, Tuberculosis and Malaria: A prospective cohort study
Source: PLoS One. 2018 Aug 22;13(8):e0200810. doi: 10.1371/journal.pone.0200810 (PMC6104922; doi:10.1371/journal.pone.0200810)
Supplement: S2 Dataset — (XLSX) [file pone.0200810.s007.xlsx]

## Sheet: Sheet1
PARTICIPANTS TRAINED AT THE WORKSHOP
Gender
Male
Male
Male
Male
Male
Male
Male
Male
Male
Male
Female
Male
Female
Male
Female
Female
Male
Female
Male
Male
Female
Female
Female
Female
Female
Female
Female
Female
Female
Male
Male
Male
Female
Female
Male
Female
Male
Male
Male
Female
Female
Male
Male
Female
Female
Female
Male
Female
Male
Male
Male
Male
Male
Male
Male
Male
