# Supplementary material for: Addressing the under-reporting of adverse drug reactions in public health programs controlling HIV/AIDS, Tuberculosis and Malaria: A prospective cohort study
Source: PLoS One. 2018 Aug 22;13(8):e0200810. doi: 10.1371/journal.pone.0200810 (PMC6104922; doi:10.1371/journal.pone.0200810)
Supplement: S3 Dataset — (XLSX) [file pone.0200810.s008.xlsx]

## Sheet: Sheet1
PHARMACOVIGILANCE COMMITTEES ACTIVATED AND HEALTH FACILITY STAFF TRAINED BY THE PARTICIPANTS
			Target Audience (Target Audience by Profession)					STEP-DOWN Outcome
Training Description ( Area of focus (i.e malaria, tuberculosis and HIV/AIDs)	Objective of the Step-Down	Mode of Delivery [Power point, Use of Information Education and Communication (IEC) Materials, Training Manual]	No. of Nurses in attendence	No. of Doctors in attendance	No. of Pharmacists in attendance	No. of Lab. Scientists in attendance	Others (specify)	Established pharmacovigilance committee	Ractivated the existing pharmacovigilance committee	Inclusion of Phamacovigilance as a topic in the routine health talk	Increase in the reporting rate (average of 10 ICSR per week) of the Adverse drug reaction of anti-tuberculosis	Involvement of the Hospital Management (i.e CMD.Head of Pharmacy e.t.c)	Total Trained	Next Step	Collaborated with SPHAR-TI participants in the state	Collaborated with a pharmaceutical company	Collaborated with NAFDAC officials in the state	Recommendation
Malaria, HIV/AIDS/TB	To train pharmacists as co-trainers for proposed step-down trainings	Training Manual	None	None	2	None	None	In progress	No	Yes	Yes	Involvement of Head of Pharmacy department	2	To step down training to all health professionals in the facility	No	No	No	Need for hospital management to be commited to and support step-down training to all healthcare providers in the facility.
Malaria, HIV/AIDS/TB	To sensitise nurses about pharmacovigilance so as to increase Adverse Drug Reaction (ADR) reporting. To train nurses on how to properly fill the Yellow form	Power point, Yellow Form	37	None	2	none	None	In progress	No	Yes	Yes	Involvement of Head of Pharmacy department	37	To step down training to remaining health professionals	No	No	No	Need for hospital management to be commited to and support step- down training to all healthcare providers in the facility.
HIV/AIDS, Malaria	To increase the awareness on ADR and the need to do prompt and proper intervention, documentation and reporting	Power Point	6	3	1	1	4	Yes	Yes	Yes	No	The Head of Hospital Services( HHS) was informed about the renewed pharmacovigillance activities in the hospital. He delegated the Head of Clinical Affairs to attend to pharmacovigillance matters as part of the pharmacovigilance team.	14	To follow up on the routine monthly meetings by the pharmacovigilance committee and ensure prompt reporting of any ADR to the committee	No	No	Yes. They provided Yellow Forms.	There is need for a pharmacovigillance Desk Officer at the state level.
Malaria	To provide a general overview on the importance of pharmacovigillance in the handling of medicines.	Power Point	0	0	0	0	29	Yes. On the condition that all cases should be reported the pharmacist at the hospital.	No	Yes	No	This training was done to Patent Medicine Vendors. The aim was to futher educate them on safe medicine handling and pharmacovigillace.	29	To follow up and ensure that all suspected ADRs are reported to the Pharmacist at the hospital.	No	No	Yes. They provided Yellow Forms.	All suspected pharmacovigillance cases should be promptly reported to the pharmacist. Patients confidentiality should be carefully handled.
HIV/AIDS, Malaria	To provide Corp Members (NYSC) with the basic information on the safe use of medicines and proper reporting of any suspected ADR to the hospital.	Power Point	0	0	1	1	23	No	No	Yes	No	No	25	To do further health talks including pharmacovigilance periodically to the corp members during Community Development Services gatherings	No	No		To inculcate pharmacovigillance activities into their clubs/societies e.g Drug Free Club, etc.
Multi- Drug Resistant Tuberculosis.	To increase pharmacovigilance awareness and the reporting of ADRs of second-line anti-tuberculosis drugs.	1. Power Point 2. Anti-tuberculosis IEC materials 3. NAFDAC yellow forms.	10	1	1	3	1 Social Worker, 3- X-ray Staff, 1 Pharmacy Technician, 3 Medical Records Staff, 3 Ward Orderlies	No	No	Yes	Yes	The Chief Medical Officer was well informed prior to the training and was in attendance. She solicited for the cooperation of all members of staff in making pharmacovigilance a culture in the facility .	26	Resolution to improve on the rate and quality of ADR reporting from the facility	No	No	No	Need for joint review of the patients medical conditions ADRs.
Susceptible and Multi- Drug Resistant Tuberculosis	To increase pharmacovigilance awareness and improvement in the rate and quality of the reporting of ADRs in susceptible and MDR-TB patients.	1. Power Point 2. Anti-tuberculosis IEC materials 3. NAFDAC yellow forms.	20	4	0	20	20 Community Health Officers, 5 Community based Organization (CBO) members	No	No	No	Yes	The meeting was facilitated by the State TB Control Officer for me to feature in the quaterly review meeting of DOT Officers of 33 LGA with the Quality Assurance Officers which normally takes place in the DFB training centre located within my facility.	69	Commitment and resolution to improve on the rate and quality of ADR reporting from their various DOT centers	No	No	Yes	Need for on-site supportive supervision of DOT Officers to further build their capacities for prompt and accurate reporting of ADRs.
All areas of public health (malaria, HIV, tuberculosis) and other medical conditions	To increase pharmacovigilance awareness and improvement in the rate and quality of the reporting of ADRs in all categories of patients.	1. Power Point 2. IEC materials for malaria, HIV and TB 3. NAFDAC yellow forms.	1	9	8	0	1 Pharmacy Technician, 3 Pharmacy Technician in-training, 4 Representatives of Pharmaceutical Companies	No	Yes	No	Not known	The Head of Pharmacy department in colaboration with Chief Consultant of the Facility facilitated the training. The Head of Pharmacy, Head of Medicine Dept and GOPD were physically present	26	Commitment and resolution to improve on the rate and quality of ADR reporting from the facility	No	Yes	No	The Health Care Provider that were in attendance requested for a follow-up training session in order to cover more areas of interest as many of disease areas could not be covered in the single traing session which was structured into a clinical presentation by a Pharmaceutical Company
Susceptible and Multi- Drug Resistant Tuberculosis	To sensitize the patients and their treatment supporters on the need to report all ADRs to Health Care Providers for documentation and intervention in order to get the best outcome from the medications and also improve their quality of life	1. IEC Materials for Tuberculosis 2. NAFDAC Yellow forms.	1	1	0	0	16 Patients, 17 Treatment Supporters, 5 Local Government DOT Officers, 4 Community-based Organization Coordinators, 1 Social Worker	No	No	Yes	Yes	The Coordinators of Community Based Organization (CBO) who were also present during the interaction facilitated the presentation during the October edition of monthly meeting of patients along with their treatment supporters with the CBOs and DOT Officers	45	Need for supportive supervisory visits to DOT centres in the LGAs for effective tracking of ADRs from the anti-tuberculosis medications, both susceptible and second line.	No	No	No	I spoke with the DOT Officers on the need for me to visit them in their DOT facilities and most of them freely accepted. I will subsequently plan to visit some of the DOT centres in turn to talk to their patient and facilitate collation of ADR reports
Susceptible and Multi- Drug Resistant Tuberculosis	To provide supportive supervision to the DOT Officers in the centre on pharmacovigilance and relate with the patients and their treatment supporters on the need to report all ADRs to Health Care Providers for documentation and intervention in order to get the best outcome from the medications and also improve their quality of life	1. IEC Materials for tuberculosis 2. NAFDAC Yellow forms.	0	0	0	0	40 Susceptible TB Patients along with some of their their relatives (20) , 4 MDR-TB Patients and their Treatment Supporters (4) , 4 staff of the TB DOT center (Focal Person and others)	No	No	No	Yes	The Head of TB DOT center was carried along in the design of the mentoring package	72	Continuous supervision, mentoring and tracking of ADR from the Primary Health Center and DOT Centre	No	No	No	Continuous supervision, mentoring and tracking of ADR from the Primary Health Center and DOT centre
Importance of Pharmacovigilaince and the Basics.	To increase pharmacovigilance awareness in the reporting of ADRs of Anti-malaria,ARTand Anti-tuberculosis drugs.	1. Power Point, ICE BERGE Video of change 2. Anti-malaria IEC, Antiretroviral IEC, Anti-tuberculosis IEC materials.	Nil	Nil	13	Nil	Nil	Yes	Yes	No	Yes	The General Manager Health managemnet Board is being intimated with the progress of Pharmacovigiliance activities.	13	To follow up on the routine monthly activities of PV by the each Hospital	Yes	No	No	Director Pharmaceutical services already paid an advocacy visit to the General Manager Health Management Board to bring out a circular mandating all hospitals to establish and strengthen the PV committee.
1.Importance of pharmacovigiliance & its Basics 2.ADRs of anti-malaria, anti-tuberculosis, ART drugs. 3.Filling of the ICRS form (Yellow Form)	To increase pharmacovigiliance awareness in the reporting of ADRs of antimalaria, anti-TB and ART drugs etc	1.Power point, Iceberge video of leadership change steps. 2.Anti-malaria, anti-TB,and ART IEC materials	Nil	Nil	20	1	4	Yes	Yes	Yes	Yes	The Head of Pharmacy Unit was well informed prior to the training and was in attendance. He requested all completed pharmacovigilance activities be reviewed by the Pharmacogilance Committee.	25	To follow-up on the routine monthly meetings by the Pharmacovigilance Committee	Yes	Collaborated with our Director Pharmaceutical.	No	The advocacy done to the Director of Pharmaceutical services have helped to achieve stepdown, and effected a mandatory monthly reporting of PV(yellow forms) & submission to the board
Importance of pharmacovigiliance & its Basics, ADRs of antimalaria, Anti-TB and Anti-retroviral	To increase pharmacovigiliance awareness in the reporting of ADRs of antimalaria, anti-TB and ART drugs etc	1.Power point, Iceberge video of leadership change steps. 2.Anti-malaria, anti-TB,and ART IEC materials	Nil	Nil	17	Nil	6	Yes	Yes	Yes	Yes	The Chief Medical Director/Head of Unit (Pharmacy unit) was well informed prior to the training and was in attendance.He requested all completed pharmacovigilance activities be reviewed by the Pharmacogilance Committee.	40	To follow-up on the routine monthly meetings by the Pharmacovigilance Committee	Yes	Collaborated with our Director Pharmaceutical.	No	The advocacy done to the Director of Pharmaceutical services have helped to achieve stepdown, and effected a mandatory monthly reporting of PV(yellow forms) & submission to the board
Importance of pharmacovigiliance & its Basics, ADRs of antimalaria, Anti-TB and Anti retroviral	To increase pharmacovigiliance awareness in the reporting of ADRs of antimalaria,anti-TB and ART drugs etc	1.Power point, Iceberge video of leadership change steps. 2.Anti-malaria, anti-TB,and ART IEC materials	12	10	13	1	4	Yes	Yes	Yes	Yes	The Chief Medical Director/Head of Unit (Pharmacy unit) was well informed prior to the training and was in attendance.He requested all completed pharmacovigilance activities be reviewed by the Pharmacogilance Committee.	25	To follow-up on the routine monthly meetings by the Pharmacovigilance Committee	Yes	Collaborated with our Director Pharmaceutical.	No	The advocacy done to the Director of Pharmaceutical services have helped to achieve stepdown, and effected a mandatory monthly reporting of PV(yellow forms) & submission to the board
Importance of pharmacovigiliance & its Basics,ADRs of antimalaria, Anti-TB and Anti-retroviral	To increase pharmacovigiliance awareness in the reporting of ADRs of antimalaria,anti-TB and ART drugs etc	1.Power point, Iceberge video of leadership change steps. 2.Anti-malaria, anti-TB,and ART IEC materials	2	4	14	Nil	1	Yes	Yes	Yes	Yes	The Chief Medical Director/Head of Unit (Pharmacy unit) was well informed prior to the training and was in attendance.He requested all completed pharmacovigilance activities be reviewed by the Pharmacogilance Committee.	21	To follow-up on the routine monthly meetings by the Pharmacovigilance Committee	Yes	Collaborated with our Director Pharmaceutical.	No	The advocacy done to the Director of Pharmaceutical services have helped to achieve stepdown, and effected a mandatory monthly reporting of PV(yellow forms) & submission to the board
Importance of pharmacovigiliance & its Basics,ADRs of antimalaria, Anti-TB and Anti-retroviral	To increase pharmacovigiliance awareness in the reporting of ADRs of antimalaria,anti-TB and ART drugs etc	1.Power point, Iceberge video of leadership change steps. 2.Anti-malaria, anti-TB,and ART IEC materials	2	4	14	Nil	1	Yes	Yes	Yes	Yes	The Chief Medical Director/Head of Unit (Pharmacy unit) was well informed prior to the training and was in attendance.He requested all completed pharmacovigilance activities be reviewed by the Pharmacogilance Committee.	21	To follow-up on the routine monthly meetings by the Pharmacovigilance Committee	Yes	Collaborated with our Director Pharmaceutical.	No	The advocacy done to the Director of Pharmaceutical services have helped to achieve stepdown, and effected a mandatory monthly reporting of PV(yellow forms) & submission to the board
Importance of pharmacovigiliance & its Basics, ADRs of antimalaria,Anti-TB and Anti retroviral	To increase pharmacovigiliance awareness in the reporting of ADRs of antimalaria,anti-TB and ART drugs etc	1.Power point, Iceberge video of leadership change steps. 2.Anti-malaria, anti-TB,and ART IEC materials	4	2	22	Nil	1	Yes	Yes	Yes	Yes	The Chief Medical Director/Head of Unit (Pharmacy unit) was well informed prior to the training and was in attendance.He requested all completed pharmacovigilance activities be reviewed by the Pharmacogilance Committee.	29	To follow-up on the routine monthly meetings by the Pharmacovigilance Committee	Yes	Collaborated with our Director Pharmaceutical.	No	The advocacy done to the Director of Pharmaceutical services have helped to achieve stepdown, and effected a mandatory monthly reporting of PV(yellow forms) & submission to the board
Importance of pharmacovigiliance & its Basics, ADRs of antimalaria, Anti-TB and Anti retroviral	To increase pharmacovigiliance awareness in the reporting of ADRs of antimalaria,anti-TB and ART drugs etc	1.Power point, Iceberge video of leadership change steps. 2.Anti-malaria, anti-TB,and ART IEC materials	4	3	10	2	9	Yes	Yes	Yes	Yes	The Chief Medical Director/Head of Unit (Pharmacy unit) was well informed prior to the training and was in attendance.He requested all completed pharmacovigilance activities be reviewed by the Pharmacogilance Committee.	30	To follow-up on the routine monthly meetings by the Pharmacovigilance Committee	Yes	Collaborated with our Director Pharmaceutical.	No	The advocacy done to the Director of Pharmaceutical services have helped to achieve stepdown, and effected a mandatory monthly reporting of PV(yellow forms) & submission to the board
Importance of pharmacovigiliance& its Basics, ADRs of antimalaria,Anti-TB and Anti retroviral	To increase pharmacovigiliance awareness in the reporting of ADRs of anti-malaria,anti-TB and ART drugs etc	1.Power point, Iceberge video of leadership change steps. 2.Anti-malaria, anti-TB,and ART IEC materials	Nil	1 MD	16	Nil	6	Yes	Yes	Yes	Yes	The Chief Medical Director/Head of Unit (Pharmacy unit) was well informed prior to the training and was in attendance.He requested all completed pharmacovigilance activities be reviewed by the Pharmacogilance Committee.	23	To follow-up on the routine monthly meetings by the Pharmacovigilance Committee	Yes	Collaborated with our Director Pharmaceutical.	No	The advocacy done to the Director of Pharmaceutical services have helped to achieve stepdown, and effected a mandatory monthly reporting of PV(yellow forms) & submission to the board
Importance of pharmacovigiliance & its Basics, ADRs of antimalaria, Anti-TB and Anti retroviral	Importance of pharmacovigiliance& its Basics,ADRs of antimalaria,Anti-TB and Anti-retroviral	1.Power point, Iceberge video of leadership change steps. 2.Anti-malaria, anti-TB,and ART IEC materials	Nil	Nil	19	Nil	7	Yes	Yes	Yes	Yes	The Chief Medical Director/Head of Unit (Pharmacy unit) was well informed prior to the training and was in attendance.He requested all completed pharmacovigilance activities be reviewed by the Pharmacogilance Committee.	26	To follow-up on the routine monthly meetings by the Pharmacovigilance Committee	Yes	Collaborated with our Director Pharmaceutical.	No	The advocacy done to the Director of Pharmaceutical services have helped to achieve stepdown, and effected a mandatory monthly reporting of PV(yellow forms) & submission to the board
Importance of pharmacovigiliance & its Basics, ADRs of antimalaria, Anti-TB and Anti retroviral	Importance of pharmacovigiliance & its Basics, ADRs of antimalaria, Anti-TB and Anti-retroviral	1.Power point, Iceberge video of leadership change steps. 2.Anti-malaria, anti-TB,and ART IEC materials	3	1 MD	16	Nil	6	Yes	Yes	Yes	Yes	The Chief Medical Director/Head of Unit (Pharmacy unit) was well informed prior to the training and was in attendance.He requested all completed pharmacovigilance activities be reviewed by the Pharmacogilance Committee.	25	To follow-up on the routine monthly meetings by the Pharmacovigilance Committee	Yes	Collaborated with our Director Pharmaceutical.	No	The advocacy done to the Director of Pharmaceutical services have helped to achieve stepdown, and effected a mandatory monthly reporting of PV(yellow forms) & submission to the board
HIV/AIDS, Malaria Multi- Drug Resistant Tuberculosis.	To educate on the basics of treatment of HIV/AIDS, TB and Malaria and to increase pharmacovigilance awareness in the reporting of ADRs of second-line anti-tuberculosis drugs.	IEC Materials on identification of ADRs of ARVs, antimalarials and anti-TB drugs	26	2	5	4	8	Yes		Yes	Yes, there is increase in the reporting rate of ADRs to ARVs every week	The CMD was well informed prior to the training. Though he was not in attendance he gave his support and encouraged many hospital workers to attend the training. He requested all completed pharmacovigilance be reviewed by the pharmacogilance committee monthly and report sent to him.	45	To follow up on the routine monthly meetings and review of ADR forms filled and how well patients that reported the ADRs are doing by the Pharmacovigilance Committee	No	No	No	Need for advocacy to key stakeholders in the states i.e. Director of pharmaceutical services
Malaria/HIV	To improve pharmacovigilance awareness in the reporting of ADRs on malaria and HIV	Use of IEC Materials and training manuals	3	3	2	1	102	Yes	Yes	Yes	Yes	The Medical Director was represented by a doctor	111	To sustain the bi-monthly meetings	Not yet	Not yet	Not yet	Need for advocacy to key stakeholders in the states i.e. director of pharmaceutical services
Tuberculosis, malaria, HIV/AIDS	Improve awareness on pharmacovigilance and ADR reporting for antimalaria, first and second line anti-TB drugs and Anti-retroviral drugs	Power Point presentation	6	7	4	3	43	No	Yes	No	Yes	Medical Director, Head of Pharmacy, Head of Clinical Services, Head of Medical Records, Head of Laboratory services and ART Co-ordinator were all present at the step-down training and the Medical Director futher encouraged staff members to report ADRs	61	Weekly monitoring of ADR detection in designated points where clients are serviced	Yes	No	No	Advocacy for regular Pharmacovigilance meeting and follow-up on issues deliberated on.
Multi-drug resistant tuberculosis	to sensitize and create awareness on pharmacovigilance and ADR reporting amogst DOTS providers in the community	Use of IEC materials	1	2	2	0	11	No	No	Yes	Yes. DOTS Providers were encouraged to fill the yellow forms when patients reported any ADR.	Tuberculosis and Lepreosy supervisors in various local governments were encouraged to monitor the filling and reporting of ADRs to the facility	16	M onthly monitoring of reported ADRs in the Primary Health Care facility	No	No	No	Advocacy for continuous awareness among DOTS providers in the commmunity
Malaria, TB, HIV/AIDS	To increase awareness and practice of reporting ADRs in areas of malaria, TB and HIV/AIDS management. Also to discuss the importance of setting up a Pharmacovigilance Unit in the Hospital.	1. Power point 2. Training manual	14	5	2	2	One Record personnel and One Radiologist	Yes		Yes	No	The Chief Medical Director , Head of Clinicals, Head of Nursing, Head of Pharmacy, Head of Laboratory and all Heads of various units were duly informed and gave their approval. The CMD was represented at the meeting while majority of the Unit Heads were present.The H.O.D Pharmacy was elected as the Chairman of the newly estalished Pharmacovigilance Unit. Other EXCOs were also selected cutting acr…	23	monthly meetings and presentations. To collaborate with state nafdac and other stake holders in the state	Yes	No	no	The need to create more awareness at the primary health care level. Provision of more IEC materials.
Review of progress made so far. Intensify awareness pn ADR in malaria, TB and HIV treatment	Review of progress made so far. Intensify awareness on ADR in malaria, TB and HIV treatment	Training manual	12	3	2	1	4	Yes		Yes	Yes	The Head of Department Pharmacy, Head of Nursing and Representative of the Chief Medical Director were present	20	Create more awareness	Yes	Yes	No	The need to do more. Also emphasixed the need to get IEC materials
Review of selected ADRS. Intensify awareness on ADR in malaria, TB and HIV treatment. Discussion on received IEC material	Review of selected ADRs. Intensify awareness on ADR in malaria, TB and HIV treatment Discussion on received IEC material	Training manual, IEC materials	10	3	2	2	2	Yes		Yes	Yes	The Head of Pharmacy, Head of Nursing and Chief Medical Director's Representative were present	19	Distribution of IEC materials to various wards and units to create more awareness	Yes	Yes	No	Need to reward staff that were outstanding in reporting ADRs
Malaria and common anti-biotics	Increase awareness and reporting of associated ADRs. Also to review progress made so far.	1. IEC Materials 2. POWER Point	9	4	1	1	4	Yes		Yes	Yes	Heads of Clinical, Pharmaceutical and Nursing Services were all represented. They reassured their commitment towards building a strong pharmacovigilance system in the hospital.	28	Outreach to nearby PHCs, NAFDAC Office and the Commissioner of Health.	Yes	Not yet, but part of next plan.	Yes	Need for involvement of policy makers and increase awareness at the grassroot level.
ARVs, Malaria & TB	1. Build health workers’ capacity to detect, report and monitor ADRs in HIV/AIDS, TB, Malaria & other drugs/herbal products 2. Develop a practical training model that can be deployed to train health workers within the shortest possible time 3. Develop simple tools for the easy identification and reporting of ADRs improve patient care and safety in relation to the use of medicines and all medical …	Power Point	2	0	20	0	4	No	No	Yes	Yes	The Chief Medical Director, Chaiman Medical Advisory Committee, Head of Administraion and other Heads of Department (Nursing, pharmacy, Internal Medicine, Family Medicine, Paediatirc, Medical laboratory, Public Health) were well informed prior to the training and slated a date for the training. Various Heads of Unit were in attendance. The Chief Medical Director instructed that all completed phar…	26	The Pharmacovigilance Committee is to act on submitted recommendation	The Pharmacovigilance Committee is to laiase with SPHAR-TI participants in the hospital	No	No	Need for advocacy to key stakeholders in the health care system in the states to inprove pharmacovigilance.
ARVs, Malaria, TB and Use of syringes and other medical devices for taking samples and reagents.	1. Build health workers’ capacity to detect, report and monitor ADRs in HIV/AIDS, TB, Malaria & other drugs/herbal products 2. Develop a practical training model that can be deployed to train health workers within the shortest possible time 3. Develop simple tools for the easy identification and reporting of ADRs improve patient care and safety in relation to the use of medicines and all medical …	Power Point	1	1	1	30	0	No	No	Yes	Yes	The Chief Medical Director, CMAC, Head of Administraion and other Heads of Department (Nursing, pharmacy, Internal Medicine, Family Medicine, Paediatirc, Medical laboratory, Public Health) were well informed prior to the training and slated a date for the training. Various Heads of Unit were in attendance. The Chief Medical Director instructed that all completed pharmacovigilance be reviewed by t…	33	The Pharmacovigilance Committee is to act on submitted recommendation	The Pharmacovigilance Committee is to laiase with SPHAR-TI participants in the hospital	No	No	Need for advocacy to key stakeholders in the health care system in the states to inprove pharmacovigilance.
ARVs, Malaria & TB.	1. Build health workers’ capacity to detect, report and monitor ADRs in HIV/AIDS, TB, Malaria & other drugs/herbal products 2. Develop a practical training model that can be deployed to train health workers within the shortest possible time 3. Develop simple tools for the easy identification and reporting of ADRs improve patient care and safety in relation to the use of medicines and all medical …	Power point and IEC Materials	4	3	1	1	6	Yes	No	Yes	Yes	The Chief Medical Director, CMAC, Head of Administraion and other Heads of Department (Nursing, pharmacy, Internal Medicine, Family Medicine, Paediatirc, Medical laboratory, Public Health) were well informed prior to the training and slated a date for the training. Various Heads of Unit were in attendance. The Chief Medical Director instructed that all completed pharmacovigilance be reviewed by t…	15	The Pharmacovigilance Committee is to act on submitted recommendation	The Pharmacovigilance Committee is to laiase with SPHAR-TI participants in the hospital	No	No	Need for advocacy to key stakeholders in the health care system in the states to inprove pharmacovigilance.
ARVs, Malaria,TB & completing the Yellow Form.	1. Build health workers’ capacity to detect, report and monitor ADRs in HIV/AIDS, TB, Malaria & other drugs/herbal products 2. Develop a practical training model that can be deployed to train health workers within the shortest possible time 3. Develop simple tools for the easy identification and reporting of ADRs improve patient care and safety in relation to the use of medicines and all medical …	Power point and IEC Materials	97	0	1	0	3	Yes	No	Yes	Yes	The Chief Medical Director, CMAC, Head of Administraion and other Heads of Department (Nursing, pharmacy, Internal Medicine, Family Medicine, Paediatirc, Medical laboratory, Public Health) were well informed prior to the training and slated a date for the training. Various Heads of Unit were in attendance. The Chief Medical Director instructed that all completed pharmacovigilance be reviewed by t…	101	The Pharmacovigilance Committee is to act on submitted recommendation	The Pharmacovigilance Committee is to laiase with SPHAR-TI participants in the hospital	No	No	Need for advocacy to key stakeholders in the health care system in the states to inprove pharmacovigilance.
ARVs, Malaria,TB & completing the Yellow Form.	1. Build health workers’ capacity to detect, report and monitor ADRs in HIV/AIDS, TB, Malaria & other drugs/herbal products 2. Develop a practical training model that can be deployed to train health workers within the shortest possible time 3. Develop simple tools for the easy identification and reporting of ADRs improve patient care and safety in relation to the use of medicines and all medical …	Power point and IEC Materials	5	13	1	0	0	Yes	No	Yes	Yes	The Chief Medical Director, CMAC, Head of Administraion and other Heads of Department (Nursing, pharmacy, Internal Medicine, Family Medicine, Paediatirc, Medical laboratory, Public Health) were well informed prior to the training and slated a date for the training. Various Heads of Unit were in attendance. The Chief Medical Director instructed that all completed pharmacovigilance be reviewed by t…	19	The Pharmacovigilance Committee is to act on submitted recommendation	The Pharmacovigilance Committee is to laiase with SPHAR-TI participants in the hospital	No	No	Need for advocacy to key stakeholders in the health care system in the states to inprove pharmacovigilance.
ARVs, Malaria,TB & completing the Yellow Form.	1. Build health workers’ capacity to detect, report and monitor ADRs in HIV/AIDS, TB, Malaria & other drugs/herbal products 2. Develop a practical training model that can be deployed to train health workers within the shortest possible time 3. Develop simple tools for the easy identification and reporting of ADRs improve patient care and safety in relation to the use of medicines and all medical …	Power point and IEC Materials	1	0	1	0	67	Yes	No	Yes	Yes	The Chief Medical Director, CMAC, Head of Administraion and other Heads of Department (Nursing, pharmacy, Internal Medicine, Family Medicine, Paediatirc, Medical laboratory, Public Health) were well informed prior to the training and slated a date for the training. Various Heads of Unit were in attendance. The Chief Medical Director instructed that all completed pharmacovigilance be reviewed by t…	69	The Pharmacovigilance Committee is to act on submitted recommendation	The Pharmacovigilance Committee is to laiase with SPHAR-TI participants in the hospital	No	No	Need for advocacy to key stakeholders in the health care system in the states to inprove pharmacovigilance.
ARVs, Malaria, TB & completing the Yellow Form.	1. Build health workers’ capacity to detect, report and monitor ADRs in HIV/AIDS, TB, Malaria & other drugs/herbal products 2. Develop a practical training model that can be deployed to train health workers within the shortest possible time 3. Develop simple tools for the easy identification and reporting of ADRs improve patient care and safety in relation to the use of medicines and all medical …	Power point and IEC Materials	2	13	2	1	1	Yes	No	Yes	Yes	The Chief Medical Director, CMAC, Head of Administraion and other Heads of Department (Nursing, pharmacy, Internal Medicine, Family Medicine, Paediatirc, Medical laboratory, Public Health) were well informed prior to the training and slated a date for the training. Various Heads of Unit were in attendance. The Chief Medical Director instructed that all completed pharmacovigilance be reviewed by t…	19	The Pharmacovigilance Committee is to act on submitted recommendation	The Pharmacovigilance Committee is to laiase with SPHAR-TI participants in the hospital	No	No	Need for advocacy to key stakeholders in the health care system in the states to inprove pharmacovigilance.
ARVs, Malaria,TB & completing the Yellow Form.	1. Build health workers’ capacity to detect, report and monitor ADRs in HIV/AIDS, TB, Malaria & other drugs/herbal products 2. Develop a practical training model that can be deployed to train health workers within the shortest possible time 3. Develop simple tools for the easy identification and reporting of ADRs improve patient care and safety in relation to the use of medicines and all medical …	Power point and IEC Materials	1	15	1	0	1	Yes	No	Yes	Yes	The Chief Medical Director, CMAC, Head of Administraion and other Heads of Department (Nursing, pharmacy, Internal Medicine, Family Medicine, Paediatirc, Medical laboratory, Public Health) were well informed prior to the training and slated a date for the training. Various Heads of Unit were in attendance. The Chief Medical Director instructed that all completed pharmacovigilance be reviewed by t…	18	The Pharmacovigilance Committee is to act on submitted recommendation	The Pharmacovigilance Committee is to laiase with SPHAR-TI participants in the hospital	No	No	Need for advocacy to key stakeholders in the health care system in the states to inprove pharmacovigilance.
Multi- Drug Resistant Tuberculosis	To create and increase pharmacovigilance awareness in the reporting of ADRs of second-line anti-tuberculosis drugs	1. Power point 2. Anti-tuberculosis IEC materials 3.ICSR(Pharmacovigilance report forms)	4	5	2	2	1	Yes	No	Yes	Yes	The Cooodinator of the MDR-TB treatment centre, represented the Chief Medical Director during the training. It was directed that all the completed pharmacovigilance form be reviewed by the committee and reported	14	Pharmacovigilance Committee meeting was scheduled monthly for a follow up	Yes	No	Yes	Need for advocacy to key stakeholders in all the hospitals, clinics and pharmacy shops in the state
Multi- Drug Resistant Tuberculosis	To create and increase pharmacovigilance awareness in the reporting of ADRs of second-line anti-tuberculosis drugs	1. Power point 2. Anti-tuberculosis IEC materials 3.ICSR(Pharmacovigilance report forms) 4. ADR Charts	5	2	56	0	6	Yes	No	Yes	Yes	The Deputy HOD Pharmacy Presented the Chief Medical Director during the training. It was agreed that all the completed pharmacovigilance forms be review by the committee before sending to NAFDAC	69	To follow up in the completing of ICSR in the various units where the forms were sent to daily	Yes	Yes	Yes	Need to report all ADRS and send to NPC, as no drug is safe. Also to visit key state holders in the hospital clinics and pharmacy shops in the state.
Multi- Drug Resistant Tuberculosis	To create and increase pharmacovigilance awareness in the reporting of ADRs of second-line anti-tuberculosis drugs	1.Anti-tuberculosis IEC materials 2.ICSR(Pharmacovigilance report forms) 3.ADR Charts	11	4	2	1	0	Yes	No	Yes	Yes	The Coordinator of the treatment centre was present. It was agreed that the completed ICSRs be reviewed by the Committee before sending to NAFDAC	18	Folow up is ongoing	Yes	No	Yes	Need to report all ADRS and send to NPC. Also to visit key stake holders in the hospital clinics and pharmacy shops in the state.
Multi- Drug Resistant Tuberculosis	To create and increase pharmacovigilance awareness in the reporting of ADRs of second-line anti-tuberculosis drugs	1. Power Point 2. Anti-tuberculosis IEC materials 3.ICSR(Pharmacovigilance report forms)	0	0	40	0	0	No	Yes	Yes	Yes	Deputy Head of Department Pharmacy represented Chaiman Medical Advisory Commitee.	40	Folow up id ongoing	Yes	No	Yes	Need monitor patients Anti-TB and report all ADRs and sent to NAFDAC. The visit to stake holders is ongoing
Pharmacovigilance at a glance I (HIV/AIDs/Malaria)	1. To expose the participants to the basics of Pharmacovigilance. 2. To bring about/increase pharmacovigilance awareness	Power Point Pharmarmacovigilance algorithm Samples of ICSR	13	9	7	0	18	No	__	No	Yes	The Chief Medical Director was well informed prior to the training. He directed that the Pharmacovigilance Algorithm be placed in his office. He gave the approval for the establishment of the Pharmacovigilance Committee to be Chaired by the Deputy CMAC (Admin.)	47	To follow up on the establishement of the Pharmacovigilance Committee	No	No	No	Training of Pharmacovigilance Committee members on pharmacovigilance. Advocacy visits within and outside the facility to major stakeholders e.g NAFDAC State office, NGOs (Fhi 360), etc
Pharmacovigilance at a glance II (HIV/AIDs/Malaria)	1. To increase pharmacovigilance awareness in the reporting of ADRs 2.To stimulate interest and encourage reporting of ADRs	Power Point ICSRs	5	17	5	7	2	Yes	__	No	Yes	Deputy Chairman AMAC was present, other Heads of Department including Pharmacy, were present. The CMD wrote a letter of , requesting for a Courtesy call to the NAFDAC state office which was honored. The NAFDAC State Coordinator, Pharmacovigilance Focal Officer and other staff visited the CMD and the Pharmacovigilance Committee on 16th August 2016.	36	Inclusion of Pharmacovigilance in health talks and other clinical acitivies	No	No	Yes	A research survey to be conducted among the clinicians to establish a base line knowledge of the hospital community on pharmacovigilance More collaborative effort with stakeholders.
Individual case safety report (ICSR) (HIV/AIDs/Malaria)		Power Point ICSRs	22	5	4	2	36	Yes	_	Yes	No	Principal officers and policy makers were in attendance such as the Director Clinical Services etc	69	More advocacy	No	No	Yes	Collaborative effort on education and training of more health workers on pharmacovigilance
Adverse Drug Reaction (ADR) Reporting		Power point ICSRs Algorithm for dtection and reporting of ADR	32	6	3	7	23	Yes	_	Yes	No	Principal officers and policy makers were in present	71	More advocacy	No	No	Yes	Expansion of advocacies on pharmacovigilance to reachout other target areas.
(A). History and Basics of Pharmacovigilance. (B). ADRs of Anti-TB drugs (first line), Anti-malaria and Antiretroviral drugs	To increase awareness and build health workers capacity to detect, report and monitor ADRs in HIV/AIDS, TB and Malaria.	Power Point			Consultant Pharmacists: 3 Senior Pharmacists: 5 Intern Pharmacists: 10		IT Students (School of Health Technology): 6	No	Yes	Yes	Yes	The Chief Medical Director was well informed prior to the training. He promised his support and all completed pharmacovigilance forms and progress reports were sent to him.	21	E.g To follow up on the routine monthly meetings by the Pharmacovigilance Committee	Yes	No	Yes	Need for advocacy to key stakeholders in the states i.e. Director of pharmaceutical services (Ministry of Health).
(A). ADRs associated with the use of antimalarials, antiretroviral drugs and antituberculosis and their management. ( B). Guidelines on detecting and reporting ADRs.	To build a network of health workers for improved pharmacovigilance service in Nigeria.	Power Point	12	24	2	2	Student Nurses: 5	A Pharmacovigilance Committee was formally incorporated into already existing Therapeutic Committee	Yes	Yes	Yes	Support from the Chief Medical Director and Head of Pharmacy continues	43	To follow up on the routine monthly meetings by the Pharmacovigilance Committee	Yes	No	Yes	Need for involvement of Director of Public Health
Health talk on ADRs to antiretrovirals and anti-TB in ART clinic	To create awareness for the patients on adverse drug reactions	Public Address	4	2	1	3	Patients: 40 Volunteers: 4			Yes	Yes	Yes	54		Yes	No	Yes	Need for patients' awareness on ADRs on regular basis
Health talk on ADRs in general drug use in General Out-Patient Department	To create awareness for the patients on adverse drug reactions	Public Address	4	2	1	Patients: 30				Yes	Yes	Yes	37		Yes	No	No	Need for patients' awareness on ADRs on regular basis
HIV/AIDS, Malaria Multi- Drug Resistant Tuberculosis.	To educate on the basics of treatment of HIV/AIDS, TB and Malaria and to increase pharmacovigilance awareness in the reporting of ADRs of second-line antituberculosis drugs.	1. IEC Materials to aid on identification of ADRs of ARVs, antimalarials and anti-TB drugs	26	2	5	4	8	Yes		Yes	Yes, there is increase in the reporting rate of ADRs to ARVs every week	The Chief Medical Director was well informed prior to the training. Though he was not in attendance, he gave his support and encouraged many hospital workers to attend the training. He requested all completed pharmacovigilance be reviewed by the pharmacogilance committee monthly and report sent to him.	45	To follow up on the routine monthly meetings and review of ADR forms filled and how well patients that reported the ADRs are doing by the pharmacovigilance committee	No	No	No	Need for advocacy to key stakeholders in the states i.e. Director of Pharmaceutical Services
HIV/AIDs and tuberculosis	To create pharmacovigilance awareness in the reporting of ADRs among local government nurses and nurses and other healthcare professionals working at the DOT Clinic and HIV/AIDS facilities in our hospital and surrounding health centers	Nomal lecture and ADR reporting materials and training manual	7	1	2	none	4	No	No	Yes	Yes	The Co-ordinator of ART program in the hospital was involved.	12	To follow up on the routine monthly meetings by the pharmacovigilance committee	Yes	No	No	Need to create more awareness on pharmacovigilance in the local government health centers, and improve ADR monitoring at the Dot centre
	To create awareness among patients and HIV Testing Services staff on prompt reporting of adverse drug reactions and reactions expected from use of HIV/AIDs.	Health education to clients on how to identify ADR to HIV/AIDs medication,training manual	2	nil	3		0ver 40 clients		No	Yes			45	To ensure continue health education of patients through health talks on ADR reporting		No		Patients need to be reminded from time through health education
	To create awareness on ADR reporting among health care professionals and how to fill and report ADR yellow form	Use of IEC materials, Training manual, Power Point	6	5	4	Other health care professionals have started submitting ADR forms	32			Yes	A Pharmacovigilance Unit for the hospital was created at the HIV Testing Services unit,increase in reporting rate	The Chief Medical Director of the hospital was fully involved and he was at the presentation . The Head of Department of Pharmacy also contributed as she had been trained a day before my presentation	47	To follow up and ensure the creation of Pharmacovigilance Committee and ensure that meeting take place as at when due	No	No	No	Need to collaborate with NAFDAC officials in the state and involve the Director of Pharmaceutical Services of Hospitals Management Board.
Malaria & HIV/AIDS	To increase pharmacovigilance awareness in the reporting of ADRs of Anti-malaria, ARVS and others.	Training manual,Yellow forms, and IEC materials sent by IHVN	4	1	1	1	17	Partially, as a subsidiary of the existing Therapeutic Committee.	No	Yes	No	The Medical Director was well informed prior to the training and was in attendance. She also filled some yellow forms and encouraged the programe.	24	To ensure that the Pharmacovigilance committee is really up and doing in the hospital, & to carry others along.	No	No	No	Need for advocacy to key stakeholders in the state i.e DPS Ministry of Health, DPS, Hospital Management Board etc
Malaria, tuberculosis and HIV/AIDs	To increase pharmacovigilance awareness in the reporting of ADRs of diseases of public health importance especially malaria, tuberculosis and HIV/AIDs	Power point Yellow forms	8	5	3	3	33	Yes	No	No	Yes	The MOH (Medical Officer of Health) was well informed prior to the training and report of the training with proposed names of committee was sent to her	40	Practical step-down training for Pharmacy Personnel	No	Yes (SKG and BIOFEM Pharm)	No	There is need for more advocacy at the grassroot health care sector. They are the first point of professional contact and closest to the community.
HIV/AIDs	Practical training of detecting ADRs of antiretrovirals available using pharmaceutical care service book and filling of pharmacovigilance form	IEC materials on HIV/ AIDS Yellow forms	0	0	1	0	4 Pharmacy Technicians	No	No	Yes	Yes	The MOH (Medical Officer of Health) was well informed	5	Step-down training to Local Government Pharmacists in Lagos State	No	No	No
Malaria, Tuberculosis and HIV/AIDs	To increase pharmacovigilance awareness in the reporting of ADRs of diseases of public health importance especially malaria, tuberculosis and HIV/AIDs	IEC materials on HIV/ AIDS, malaria and tuberculosis Yellow forms	1	0	0	0	2 (Community Health Officer and Pharmacy Technician	No	No	Yes	Yes	The MOH (Medical Officer of Health) was well informed	3		No	No	No
Tuberculosis	To educate the patients on ADRs of anti tuberculosis drugs To increase pharmacovigilance awareness in the reporting of ADRs tuberculosis by patients	IEC materials on tuberculosis	1	0	0	0	1 (Community Health Officer)	No	No	Yes	Yes	The MOH (Medical Officer of Health) was well informed	23	Step-down training to Local Government Pharmacists in Lagos State	No	No	No	1. There is need for more advocacy at the grassroot health care sector. They are the first point of professional contact and closest to the community. 2. Inclusion of Pharmacovigilance at Health tals in the facilities is very neccessary
Importance of Pharmacovigilance. HIV/AIDs	To increase awareness on the importance of pharmacovigilance and spontaneous reporting of ADRs in HIV/AIDs patients	Power Point HIV/AIDs IEC materials	1	8	3	2	4	No	No	No	Yes	The Hospital Management was informed prior to the meeting and was represented by the Head of the Special Treatment Center Clinic. He suggested including a review of ADR cases during the Switch Committee meetings pending the time the hospital sets up a Pharmacovigilance committee.	17	To review all cases of adverse events to ARV drugs during the bimonthly switch committee meeting.	No	No	No	The need for advocacy to key stakeholders in the hospital in order to set up a Pharmacovigilance Committee.
Improving Patients care through Pharmacovigilance	To promote understanding of the components of the Pharmacovigilance system in Nigeria. To create awareness on pharmacovigilance activities and improve the rate of ADR reporting in FMC Jabi.	Power Point	0	0	26	0	5	No	No	No	Yes	The Head of Pharmacy Department was well informed prior to the training and was in attendance. He requested copies of all completed ICSR forms and reports be sent to him .	31		No	Yes	No
ADRs of ARV drugs. HIV/AIDs	To increase pharmacovigilance awareness of the common ADRs to ARV drugs in patients. To promote the rational use of medicines	Power Point HIV/AIDs IEC materials	3	1	2	0	7	No	No	Yes	Yes	The Head of the Special Treament Center Clinic was informed of the meeting.	13	To meet with the hospital management for update on the need to set up a pharmacovigilance committee	No	No	No
ADRs of ARV drugs. HIV/AIDs	To increase pharmacovigilance awareness of the common ADRs to ARV drugs in patients. To promote the rational use of medicines	Power Point HIV/AIDs IEC materials	0	5	21	0	0	No	No	Yes	Yes	The Head of the Special Treament Center Clinic and The Head of Pharmacy Department were informed prior to the training and they were both in attendance	26	A reminder visit was made to the Hospital Management for update on the need and importance of setting up a Pharmacovigilance Committee	No	Yes	No
HIV/AIDS & Malaria	To improve pharmacovigilance awarness amongst Pharmacovigilance Committee members. To heighten pharmacovigilance activities through active Pharmacovigilance Committee participation	Power Point	1	2	2	1	2	No	Yes	No	No	The Hospital Commander was informed prior to the step-down training for the Pharmacovigilance Committee members for which he gave his approval	8	To include pharmacovigilance among topics discussed during routine health talks	No	No	No	Need for training of pharmacy staff and all hospital staff on pharmacovigilance
HIV/AIDS & Malaria	To educate pharmacy staff on the concept of pharmacovigilance. To train pharmacy staff on how to document adverse drug reactions accurately.	Power Point ICSR samples	NIL	NIL	4	NIL	8	No	Yes	No	No	The Hospital Commander was informed prior to the step-down training for the pharmacy staff	12	To make pharmacovigilance training a routine in the pharmacy department	No	No	No	Need for training for all hospital staff on pharmacovigilance
HIV/AIDS, Tuberculosis & Malaria	To educate all medical staff on the concept of pharmacovigilance. To train staff on how to document adverse drug reactions accurately.	Power Point ICSR samples	19	7	4	3	28	No	Yes	Yes	No	The Hospital Commander was informed prior to the training. He attended the training session and enjoined all to see pharmacovigilance as everybody's business. He requested the Pharmacovigilance Committee to be more active than ever and always compile and forward duly filled ICSR forms to appropriate offices.	61	To make presentations on pharmacovigilance a routine topic in the hospital's training programme to be presented by all departments	No	No	No	Need for detailed pharmacovigilance training to enhance ICSR form filling skills of all medical professionals
HIV/AIDS, Tuberculosis & Malaria	To enlighten all members of the health team on the importance of the ICSR form and how to fill it correctly	Power Point ICSR samples	14	8	4	4	3	No	Yes	Yes	No	The Hospital Commander was informed prior to the training and was also in attendance.	33	To make a presentation on pharmacovigilance in the next Nigerian Air Force Health Week	No	No	No	Need for all health professionals to participate in pharmacovigilance activities
Malaria & HIV/AIDS	To increase pharmacovigilance awareness in the reporting of ADRs of Antimalaria, ARVS and others.	Training manual, 2.Yellow forms 3. IEC materials sent fromIHVN	4	1	1	1	17	Partially, as a subsidiary of the existing Therapeutic Committee.	No	Yes	No	The Medical Director was well informed prior to the training and was in attendance. She also filled some yellow forms and encouraged the program.	24	To ensure that the Pharmacovigilance Committee is really up and doing in the hospital, & to carry others along.	No	No	No	Need for advocacy to key stakeholders in the state i.e Director Of Pharmaceutical ministry of health, DPS hmb etc
Malaria & HIV/AIDS	Emphasis on the importance & implications of pharmacovigilance, filling the yellow forms & submission of ICSRS.	Use of IEC materials, training manuals & yellow forms.	2	1	1 Pharmacy Technician	0	2	As a subsidiary of the existing Therapeutic Committee.	No	Yes	No	Yes, the Medical Director and the entire management team are well informed and carried along.	5	NO	No	No	No, but I visited them and the Pharmacist-in-charge promised to visit my facility very soon.	Need for advocacy to key stakeholders in the state e.g Director of Pharmaceutical Services, Ministry of Health, DPS Hospital Management Board, Pharmacists at the Local Government level, Pharmaceutical Society of Nigeria, national & state chapters etc.
Malaria, TB, HIV/AIDS	To increase awareness and practice of reporting ADRs in areas of malaria, TB and HIV/AIDS management. Also to discuss the importance of setting up a Pharmacovigilance Unit in the hospital	Power point Training manual	14	5	2	2	2…(One Record Personnel and one Radiologist)	Yes		Yes	No	The Chief Medical Director, Heads of Unit (Clinicals, Nursing, Pharmacy, Laboratory) and heads of other units were duly informed and gave their approval. The Chief Medical Director was represented at the meeting while majority of the Unit Heads were present. The Head of Department, Pharmacy was elected as the Chairman of the newly estalished Pharmacovigilance Unit. Other Executive Committee Membe…	23	Monthly meetings and presentations. To collaborate with state NAFDAC and other stake holders in the state	Yes	No	No	There is need to create more awareness at the primary,secondary health care level. Provision of more IEC materials.
Review of progress made so far and intensify awareness on ADR in malaria, TB and HIV treatment	Review of progress made so far. Intensify awareness on ADR in malaria, TB and HIV treatment	Training manual	12	3	2	1	4	Yes		Yes	Yes	Head of Department of Pharmacy, Nursing and the Chief Medical Director's Representative were present	20	Create more awareness	Yes	Yes	No	The need to do more and get IEC materials
Review of selected ADRs and intensify awareness on ADR in malaria, TB and HIV treatment. Discussions on IEC material	Review of selected ADRs. Intensify awareness on ADR in malaria, TB and HIV treatment. Discussion on received IEC material	Training manual, IEC materials	10	3	2	2	2	Yes		Yes	Yes	Head of Department of Pharmacy, Nursing and the Chief Medical Director's Representative were present	19	Distribution of IEC materials to various wards and units to create more awareness	Yes	Yes	Yes	Need to reward staff that were outstanding in reporting ADRs
HIV/AIDs	To increase pharmacovigilance awareness in the ADR reporting of ARV drugs	Use of IEC materials and training manuals	0	0	4	0	14	No	No	No	No	Chief Medical Director was informed and approved	18	To revive the Pharmacovigilance Committee	No	Yes	No	Need for advocacy to key stakeholdres in the State Ministry of Health and Health Management Board
HIV/AIDs	To sensitize doctors, nurses and all staff about reporting of ADRs	Use of IEC materials and training manuals	4	6	4	6		No	No	Yes	No	The Chief Medical Director attended with the Heads of Dept O/G , Paediatrics,	20	To follow up on routine monthly meeting by the Pharmacovigilance committee	No	Yes	No	Need to continue retraining Pharmacy staff on Pharmacovigilance
HIV/AIDS	To stimulate the PV commitee to be more active in reporting ADRs	Use of IEC materials and training manuals	5	6	4	6		Yes	No	Yes	Yes	The Chief Medical Director requested all completed ICSRs to be reviewed PV committee monthly	21	To monitor, report and manage ADRs effectively	No	Yes	No	Need to increase awareness amongst patients and treatment population
HIV/AIDS	Use of IEC materials and training manuals		10	0	4	6		Yes	No	Yes	Yes	Hospital Management staff attended	20	To monitor, report and manage ADRs effectively	No	Yes	No	Need to increase awareness amongst all health workers
HIV/AIDS	To increase pharmacovigilance awareness in the reporting of ADRs of anti- retroviral drugs. To demonstrate how to complete a pharmacovigilance (yellow) form.	HIV/AIDS IEC materials Pharmacovigilance forms	0	0	11	4	4	No	No	No	No	It was a State Meeting. Director of Pharmaceuitcal Services, State Ministry of Health, State TB/HIV Officer (Doctor), Head of Pharmaceutical Services of the Primary Health Center Board, Head of Laboratory Services Primary Health Center Board, HIV Program Officer Primary Health Center Board (Doctor) were all in attendance.	24	To follow up and ensure the facility staffs report ADRs in their hospitals and completely fill the PV forms. (personnel were from seven secondary health facilities). To ensure Pharmacoviligance Commitees are either created or activated in these facilities. To ensure Pharmacovigilance topics are part of their health talks. To follow up on advocacy to the State Director of Pharmaceutical Services.	No	No	No	Need for advocacy to the Principal officers of the State Ministry of Health to ensure that PV committees are active in the HFs
HIV/AIDS	To increase pharmacovigilance awareness in the reporting of ADRs of anti- retroviral drugs. To demonstrate how to complete a pharmacovigilance (yellow) form.	Power Point Pharmacovigilance (Yellow) Forms HIV/AIDS IEC materials	6	0	16	0	11	No	No	No	Yes	It was a State Meeting. Focal Persons in-Charge of HIV/AIDS services in 32 health facilities which included Government Secondary Health Facilities and Primary Health Centers and private as well as faith based organizations were trained in pharmacovigilance and in ensuring the yellow forms were completely filled.	32	To follow up and ensure the facility staffs report ADRs in their hospitals and completely fill the PV forms. (personnel were from 32HFs). To ensure PV commitees are either created or activated in these facilities. To ensure PV topics are part of their health talks. To follow up on advocacy to the State Director of Pharmaceutical Services.	Yes	No	No	Need for advocacy to the Principal officers of the State Ministry of Health to ensure that Pharmacovigilance Committees are active in the health facilities
Multi-drug resistant tuberculosis	To increase the awareness of pharmacovigilance amongst DOTS providers in reporting of ADRs detected in 2nd line TB therapy	Antituberculosis IEC materials used	1	2	2	0	11	No	Yes	Yes	Yes	Involvement of the State TB Focal Person and team .DOTS Provider Supervisors were encouraged to monitor the rate of ADR reporting in the various PHCs in their local government	16	To contact TBLS monthly on progress report on ADR detection and reporting in their local government	Yes	No	No	Need for advocacy amongst healthcare providers in the state on the need for continous ADR reporting
HAART related problems in HIV/AIDS , adverse effect of antimalaria drug	To increase pharmacovigilance awareness in the reporting of ADRs of anti-retroviral drugs in HIV/AIDS and antimalaria	IEC materials and training manuals	9	2	2	1	3	Yes	No	Yes	No	The Chief Medical Director (CMD) , and Head of Departments were aware of the training and attended. The CMD requested all completed pharmacovigilance report be reviewed by the pharmacogilance committee monthly.	17	To follow-up on the routine monthly meetings by the Pharmacovigilance Committee	No	No	No	Need for advocacy to other HIV/AIDS programme centres in the state
Adverse Drug Reactions in HIV/AIDS therapy	To report and step down findings of the Pharmacovigilance Committee	IEC materials	5	2	1	1	3	No	No	Yes	No	Members of the hospital management were in attendance	12	To monitor and report patients with ADRs and follow-up	No	No	No	Increase awareness among treatment population
Adverse Drug Reactions in malaria treatment therapy	To sensitize team members and review ADRs reporting using ICSR	IEC materials and ICSRs (Yellow Form)	5	3	2	1	2	No	No	Yes	No	Members of the hospital management were in attendance	13	To monitor and report patients with ADRs and follow-up	No	No	No	Increase awareness among patients for prompt reporting of ADRs
Adverse Drug Reactions to anti-retroviral and antimalaria drugs	To further review HIV/AIDS and malaria ADRs reporting using ICSR	IEC materials and ICSRs	6	2	1	1	2	No	No	Yes	No	Members of the hospital management were in attendance	12	To monitor and report patients with ADRs and follow-up	No	No	No	Increase awareness among patients for prompt reporting of ADRs
HIV/AIDS, TB , Malaria and other drugs	To increase pharmacovigilance awareness and the reporting of ADRs from drugs used in the hospital	1. Power Point 2. Pharmacovigilance (Yellow) Forms	11	6	6	3	10	Yes	Yes	Yes	No	A step down training at the routine weekly hospital clinical meeting.	36	To ensure availability of Yellow forms in all the hospital wards.	No	Yes	No	Need for the hospital Pharmacovigilance Committee and other staff who have been trained on pharmacovigilance find ways to work together.
HIV/AIDS	To increase pharmacovigilance awareness and the reporting of ADRs of anti retroviral drugs and to demonstrate how to complete a pharmacovigilance (yellow) form.	Pharmacovigilance Forms	0	0	9		3	No	No	No	No	A step down training for members of staff in my department which includes, Pharmacists and Pharmacy technicians	12	To make yellow form available in the clinic and ensure every member of staff is able to fill it correctly	Yes	No	No	Need for reportage of ADRs for all drugs and diseased condition, not limited to HIV/AIDS, Malaria and TB.
HIV/AIDS	To increase pharmacovigilance awareness and the reporting of ADRs of anti-retroviral drugs.	1. Yellow Forms 2. HIV/AIDS IEC materials	6	0		0	7	No	No	Yes	No	Step down training for nurses, medical record officers and counsellors at the ART clinic	13	To make yellow form available in the clinic and ensure every member of staff is able to fill it correctly	No	No	No	Need for reportage of ADRs for all drugs and diseased condition, not limited to HIV/AIDS, Malaria and TB.
General drug use	To create awareness on pharmacovigilance among patients attending GOPD and ARTclinic and encourage reporting of ADRs	Yellow form and IEC materials					58	No	No	Yes	No	Yes	58	To have a repeated talk on pharmacovigillance with out patients attending the hospital at least once a week.	No	No	No	Patients are continually reminded to report ADR
Multi- Drug Resistant Tuberculosis.	To increase pharmacovigilance awareness in the reporting of ADRs of second-line anti-tuberculosis drugs.	1. Power point 2. Anti-tuberculosis IEC materials	1	3	2	10	3	No	Yes	No	Yes	The Chief Medical Director was informed prior to the training and was in attendance. He requested all completed pharmacovigilance be reviewed by the pharmacogilance committee monthly and report sent to him.	12	To follow up on the routine monthly meetings by the Pharmacovigilance Committee	No	Yes	Yes	Need for advocacy to key stakeholders in the states i.e. Director of Pharmaceutical services
HIV/AIDS, TB.	To increase pharmacovigilance awareness and enhance reporting of ADRs in ARV drugs and other regular drugs and related compounds.	HIV/AIDS IEC materials.	2	2	1	1	Monitoring & Evaluation Staff: 2 Adherence Counselors: 2 Patients: 70	Yes	No	Yes	No	The Medical Director was well informed and fully contributed in the selection of focal personnels to form the Pharmacovugilance Committee.	5	To follow-up on coordination of the routine meeting of the committee in conjunction with cluster meetings for the site.	No	No	No	Need for advocacy to key holders in the states.
HIV/AIDS	To keep pharmacovigilance and ADRs reporting alive, to train more people and increase awareness.	Power Point presentation and HIV/AIDS IEC materials.	10	5	1	2	Monitoring & Evaluation Staff: 2 Pharmacy technicians: 2 Adherence counsellors: 3.	Yes	Yes	Yes	No	The Medical Director, Administrator, Heads of Unit of Laboratory, Pharmacy and Nursing were present	10	To follow-up on proper filling of pharmacovigilance forms.	No	No	No	Need for continued revitalization of the committee
HIV/AIDS, TB and Malaria.	To encourage more ADR reporting.	HIV/AIDS IEC Materials and powerpoint presentation.	8	3	1	1	Student Nurses: 24, Pharmacy Technicians: 2 Mentor Mother: 1 Adherence counsellors: 3 Monitoring and Evaluation Staff: 2	Yes	Yes	Yes	Yes	The Head of Pharmacy is fully involved	25	To continue to carry out already established pharmacovigilance and ADR reporting practice	No	No	No	Need for continued support and encouragement of the practice in the facility.
HIV/AIDS, TB and Malaria	To enhance ADR reporting	Materials	8	3	1	1	Monitoring & Evaluation Staff: 2 Adherence Counselors: 3 Patients: 80	Yes	Yes	Yes	Yes	The Head of Department of Pharmacy was fully involved	25	To maintain already established pharmacovigilance and ADR reporting	No	No	No	Need for continued support.
Drug related reactions to HIV/AIDS	To increase pharmacovigilance awareness in the reporting of ADRs of anti-retroviral drugs and proper filling of the Yellow Forms	IEC materials and training manuals	6	3	1	2	Pharmacy Technicians: 3, Monitoring & Evaluation: 2 Patients: 5, Administration: 3	Yes	No	Yes	No	The Medical Director, Hospital Secretary and Some Heads of Departmentwere in attendance.	25	To incorporate Pharmacovigilance into the routine health talks in the facility	No	Yes	No	Pharmacovigilance is to be advocated in all government facilities in the state.
Adverse Drug Reactions in HIV/AIDS therapy	To Evaluate the reports and observations of the Pharmacovigilance Committee	IEC materials	4	2	1	1	10	Already in existence	No	Yes	No	Members of the Hospital Management were in attendance	18	To monitor and report patients with ADRs and follow up	No	Yes	No	Pharmacovigilance is to be advocated in all government facilities in the state.
Adverse Drug Reactions in Malaria therapy	To sensitize on the possible ADRs to some malaria drugs.	IEC materials.	4	1	1	2	6	Already in existence	No	Yes	No	Some members of the Hospital Management (incuding the Medical Director)were in attendance	14	To monitor and report patients with ADRs and follow up	No	Yes	No	Pharmacovigilance is to be advocated in all government facilities in the state.
ADRs in HIV/AIDS and Malaria	To increase awareness and strengthen the reporting of ADRs.	NAFDAC Yellow Forms	5	2	1	1	7	Already in existence	No	Yes	No	Yes	16	To monitor and report patients with ADRs and follow up	No	Yes	No	Pharmacovigilance is to be advocated in all government facilities in the state.
All disease spectrum and any condition that will warrant drug use	To increase pharmacovigilance awareness ad improve reporting rates of adverse drug reactions.	Power Point and Training manual	0	0	40	0	0	Already in existence	Yes	Yes	Yes	The management of the hospital has given pharmacovigilance activities in the hospital its full support	40	To follow- up on the routine monthly meetings by the pharmacovigilance committee	Yes	No	No	Need for continuous advocacy until goals are met.
HIV/AIDS	To increase pharmacovigilance awareness ad improve reporting rates of adverse drug reactions associated with the use of anti retrovirals	Training Manual and Pharmacovigilance Yellow Forms	0	0	5	2	2	Yes	No	Yes	Yes	The management of the hospital has given pharmacovigilance activities in the hospital its full support	7	Conduct a step-down training including other members of staff in the clinic	No	No	No	Distribute IEC materials around the clinic and in doctor's Offices.
HIV/AIDS	Increase ADR reporting.	NAFDAC Yellow Forms	3	3	3	2	8	No	Yes	Yes	Yes	Pharmacovigilance reporting has become a routine part of the hospital's monthly meetings	19		No	No	No	Distribute IEC materials around the clinic and in doctor's offices.
HIV/AIDS	Continued advocacy and paying reminder visits to previously trained personnel		4	2	6	2	0	No	Yes	Yes	Yes		12	Monitoring and Evaluation	No	No	No	Supply yellow forms to the doctor's offices and nurse's stations.
General discussions on ADRs with some focus on Anti-malaria	To increase pharmacovigilance awareness among the populace and healthcare workers	Yellow forms and improvised materials	6	5	none	1	68	No	No	No	Yes	The Head of the Primary Health Center was in attendance	80	This is being planned	No	No	No	Need for IEC materials for Socratic discussions
General discussions on ADR with some focus on Anti-Tuberculosis drugs	To build the competences of workers in the DOTS clinic to recognize ADRs	Improvised Yellow forms	2				2	No	No	Yes	Yes	Focal Person for TB in the clinic	4	Developed template to quickly recognise and report the ADRs	No	No	No	Need for IEC materials for Socratic discussions
