# Supplementary material for: Addressing the under-reporting of adverse drug reactions in public health programs controlling HIV/AIDS, Tuberculosis and Malaria: A prospective cohort study
Source: PLoS One. 2018 Aug 22;13(8):e0200810. doi: 10.1371/journal.pone.0200810 (PMC6104922; doi:10.1371/journal.pone.0200810)
Supplement: S4 Dataset — (XLSX) [file pone.0200810.s009.xlsx]

## Sheet: Sheet2
PRE AND POST TEST SCORES
CANDIDATE IDENTIFICATION NUMBER	Pre-Test	Pre- Test %	Post-Test	Post- Test %
1	19	43.1818	22	50
2	24	54.5455	30	68.1818
3	25	56.8182	24	54.5455
4	12	27.2727	26	59.0909
5	32	72.7273	29	65.9091
6	12	27.2727	15	34.0909
7	29	65.9091	35	79.5455
8	28	63.6364	31	70.4545
9	31	70.4545	31	70.4545
10	24	54.5455	29	65.9091
11	20	45.4545	27	61.3636
12	18	40.9091	14	31.8182
13	28	63.6364	34	77.2727
14	11	25	21	47.7273
15	9	20.4545	29	65.9091
16	22	50	30	68.1818
17	14	31.8182	25	56.8182
18	26	59.0909	29	65.9091
19	5	11.3636	13	29.5455
20	18	40.9091	24	54.5455
21	9	20.4545	21	47.7273
22	27	61.3636	30	68.1818
23	9	20.4545	30	68.1818
24	33	75	31	70.4545
25	23	52.2727	33	75
26	8	18.1818	25	56.8182
27	7	15.9091	29	65.9091
28	24	54.5455	32	72.7273
29	26	59.0909	28	63.6364
30	23	52.2727	25	56.8182
31	30	68.1818	28	63.6364
32	25	56.8182	33	75
33	23	52.2727	30	68.1818
34	28	63.6364	31	70.4545
35	18	40.9091	29	65.9091
36	22	50	26	59.0909
37	25	56.8182	32	72.7273
38	12	27.2727	25	56.8182
39	11	25	15	34.0909
40	23	52.2727	28	63.6364
41	29	65.9091	39	88.6364
42	10	22.7273	33	75
43	7	15.9091	33	75
44	24	54.5455	25	56.8182
45	21	47.7273	28	63.6364
46	20	45.4545	28	63.6364
47	27	61.3636	36	81.8182
48	24	54.5455	35	79.5455
49	24	54.5455	23	52.2727
50	12	27.2727	31	70.4545
51	26	59.0909	28	63.6364
52	13	29.5455	28	63.6364
53	30	68.1818	31	70.4545
54	8	18.1818	12	27.2727
55	33	75	33	75
