# Supplementary material for: Addressing the under-reporting of adverse drug reactions in public health programs controlling HIV/AIDS, Tuberculosis and Malaria: A prospective cohort study
Source: PLoS One. 2018 Aug 22;13(8):e0200810. doi: 10.1371/journal.pone.0200810 (PMC6104922; doi:10.1371/journal.pone.0200810)
Supplement: S5 Dataset — (XLSX) [file pone.0200810.s010.xlsx]

## Sheet: Sheet1
			SUSPECTED ADVERSE DRUG RECTIONS
Age in years	SEX	WEIGHT (Kg)	DESCRIPTION OF ADR	OUTCOME OF REACTION	Was Patient Admitted Due to ADR	If Already Hospitalized, Was it Prolonged Due to ADR	Treatment of Reaction	Drug Regimen	Indications for Use	Dosage	Route of Administration	Dosage	Reason for Use
32	F	41	DIARRHOEA	Recovered fully	No			TDF 300/3TC 300 / EFV	ART	1 TAB O.D	ORAL	960MG	PROPHYLAXIS
41	F	57	RASHES	Recovered fully	No			AZT300/3TC150/NVP200G	ART	1 TAB	ORAL	1 TAB OD	OI PROPHYLAXIS
30	F	55	RASHES	Recovered fully	No			TDF300/3TC300/EN600MG	ART	1 TAB O.D	ORAL	1 TAB OD	OI PROPHYLAXIS
37	M	65	RASHES	Recovered fully	No			TDF300/3TC300/EPV600MG	ART	1 TAB O.D	ART	1 TAB O.D	PROPHYLAXIS
42	F	55	RASHES	Recovered fully	No			TDF300/3TC300/EFV600MG	ART	1 TAB O.D	ORAL	960MG O.D	PROPHYLAXIS
45	F	80	RASHES	Recovered fully	No			AZT300MG/3TC150/NVP200MG	ART	1 TAB B.D	ORAL		PROPHYLAXIS
39	F	65	RASHES		No			TDF300/3TC300/EPV600MG	ART	1 TAB O.D	ORAL	1 TAB O.D	PROPHYLAXIS
38	F	60	LOSS OF WEIGHT,PROFUSE SWEATING,RASHES		No				ART	1 TAB O.D	ORAL	1 TAB O.D	PROPHYLAXIS
36	F	70	RASHES		No			TDF300/3TC300/EFV600MG	ART	1 TAB O.D	ORAL	1 TAB O.D	PROPHYLAXIS
34	F	65	ANAEMIA, RASHES	Recovered fully	Yes			AZT300MG/3TC150/NVP200MG	ART	1 TAB B.D	ORAL	1 TAB O.D	PROPHYLAXIS
39	F	74	AMMENORRHEA		No				ART	1 TAB B.D	ORAL	1 TAB O.D	PROPHYLAXIS
	F	90	RASHES, PRURITIS		No			TDF300/3TC300/EFV600MG	ART	1 TAB O.D	ORAL	960MG O.D	PROPHYLAXIS
35	F	54	INFLAMMATORY RASHES	Recovered fully	No			TDF300/3TC300/EFV600MG	ART	1 TAB O.D	ORAL	1 TAB O.D	PROPHYLAXIS
47	F	95	PALPITATION,BURNING SENSANTION AT THE EXTRENITIES,HEADACHE,DIZZINESS		No				ART	1 TAB O.D	ORAL	1 TAB O.D	PROPHYLAXIS
18	F	50	RASHES, PRURITIS	Recovered fully	No			TDF300/3TC300/EFV600MG	ART	1 TAB O.D	ORAL	1 TAB O.D	PROPHYLAXIS
40	F	65	RASHES	Recovered fully	No				ART	1 TAB O.D	ORAL	O.D	PROPHYLAXIS
42	F	95	DIZZINESS, PARESTHESIA		Yes			TDF300/3TC300/EFV600MG	ART	1 TAB O.D	ORAL	960MG O.D	PROPHYLAXIS
42	F	67	SKIN RASHES, PRURITIS	Recovered fully	No			TDF/3TC/EFV	ART	1 TAB O.D	ORAL		PROPHYLAXIS, SUPPLIMENTS
41	F	68	RASHES, PRURITIS, INSOMNIA	Recovered fully	No				ART	1 TAB O.D	ORAL	1 TAB O.D	PROPHYLAXIS
39	F	50	SKIN RASHES, PRURITIS		No			AZT300MG/3TC150/NVP200MG	ART	1 TAB B.D	ORAL	960MG O.D	PROPHYLAXIS
26	F	50	CONSTANT DIZZINESS, INSOMNIA	Recovered fully	No			TDF300/3TC300/EFV600MG	ART	1 TAB O.D	ORAL	960MG O.D	PROPHYLAXIS
43	F	53	PERIPHERAL NEUROPATHY	Recovered fully	No				ART	1 TAB O.D	ORAL	1 TAB O.D
32	F	59	RASHES, PRURITIS, INSOMNIA	Recovered fully	No				ART	1 TAB O.D	ORAL
49	F	69	INSOMNIA, PERIPHERAL NEUROPATHY		No			TDF300/3TC300/EFV600MG	ART	1 TAB O.D	ORAL	1 TAB O.D	PROPHYLAXIS
33	F	64	RASHES WITH PUS CONJUCTIVITIS	Recovered fully	No				ART	1 TAB O.D	ORAL	1 TAB O.D	PROPHYLAXIS
38	F	80	PRURITIS, AMENORRHEA, RASHES		No			ART300MG/3TC150/NVP200MG	ART	1 TAB B.D	ORAL	O.D	O.I
37	F	59	NUMBNESS AT THE EXTRIMITIES		No			TDF300/3TC300/EFV600MG	ART	1 TAB O.D	ORAL	960MG O.D	PROPHYLAXIS
32	F	60	AMMENORRHEA		No			TDF300/3TC300/EFV600MG	ART	1 TAB O.D	ORAL	960MG O.D	PROPHYLAXIS
55	M	86	DIZZINESS, INSOMNIA	Recovered fully	No			TDF300/3TC300/EFV600MG	ART	1 TAB O.D	ORAL	960MG O.D	PROPHYLAXIS
38	F	59	CONSTANT BODY WEAKNESS, BODY PAINS	Recovered fully	No			TDF300/3TC300/EFV600MG	ART	1 TAB O.D	ORAL	960MG O.D	PROPHYLAXIS
58	F	67	DIZZINESS, INSOMNIA		No				ART	1 B.D	ORALLY	960MG O.D	O.I
30	F	62	GENERALISED BODY RASHES, PRURITIS		No			ART300MG/3TC150/NVP200MG	ART	1 TAB B.D	ORAL	1 TAB O.D	PROPHYLAXIS
37	F	44	RASHES, PRURITIS		No			TDF300/3TC300/EFV600MG	ART	1 TAB O.D	ORAL	960MG O.D	PROPHYLAXIS
48		58	SKIN RASHES, PRURITIS,VAGINAL RASHES		No			TDF300/3TC300/EFV600MG	ART	1 TAB O.D	ORAL	960MG O.D	PROPHYLAXIS
39	F	110	SKIN RASHES, PRURITIS	Recovered fully	No			TDF300/3TC300/EFV600MG	ART	1 TAB O.D	ORAL	960MG O.D	PROPHYLAXIS
25	F	40	RASHES, PRURITIS	Recovered fully	No			TDF300/3TC300/EFV600MG	ART	1 TAB O.D	ORAL	1 TAB O.D	PROPHYLAXIS
25	M	72	SERIOUS WEAKNESS, FEELING OF STOMACH EMPTINESS EVEN AFTER EATING , SERIOUS NAUSEA	Recovered fully	No			ARTESUNATE	MALARIA	120MG	I.V	300MG	FEVER
30	M	62	FACIAL RASHES, BODY RASHES	Other	No		DRUG STOPED	CO-TRIMOXAZOLE	AIDS MANAGEMENT PROPHYLASES	960MG	ORAL	200MG, 150/300	ART
19	F	42	BODY RASHES ,BUCCAL ULCER	Recovered fully	No	No		PIROXICAM	FEVER, PAIN	200MG	ORAL	625MG	SEPRIS
45	M	57	HYPOTENSION		No	No	COUNSELLED	EFV+TDF+3TC	AIDS MANAGEMENT	600/300 300MG	ORAL		PYREXIA
55	M	72	DIARRHOEA		No	No	ORS TAB METRONIDAZOLE	PCM/DICLOFENCE/CAFF	PAIN	NOT AVAILABLE	ORAL	600/300/300	ART
42	F		DIZZINESS, EPIGASTRIC DISCOMFORT	Recovered fully	No		WITHDRAWAL OF DRUG	CIPROFLOXAAN	URINARY TRACT INFEHMA	500MG	ORAL	100MG,1G	UTI
	M	65	DIZZINESS , HEMORRHOIDS, HYPERTENSION	Other	No	No	COUNSELLED /DRUGS	EFV/3TC/TDF	ART	600/300 300MG	P.O	960MG,300MG,50MG	ART,ART,PAIN
45	F	57	COUGH, FEVER, HEADACHE, EPIGASTRIC PAINS, HYPOTENSION	Other	No	No	SYMTOMATIC TREATMENT INSTITUTED	CO-TRIMOXAZOLE	AIDS PROPHYLASES	960MG	P.O	3,3,2.1G.40MG	MALARIA,FEVER
35	F	39	FREQUENT VOMITTING STOMACHE ,ABDOMINAL CRAMPS	Other	No	No		EFV/3TC/TDF	ANTIRETROVIRALS	1 DAILY	ORAL	960MG O.D	O.I PROPHYLASES
65	M	58	DIFFUSE SKIN EXCORATION WITH HYPERPIGMENTED PATCHES, SEVERE CONJUCTURAL EROSION, CORNEAL OEDEMA WITH ULCERATION, SEVERE MUCOSAL EROSION AND INFLAMATION	Life Threatening	Yes			ALLOPURINOL	PEDAL OEDEMA [SWOLLEN FEET]	300MG	P.O	100MG	PAIN
32	F	92	FACIAL RASHES	Other	No	No	HYDRUCORTISOME CREAM[SKIN]	CO-TRIMOXAZOLE	ART O.I PROPHYLASES	960MG	P.O	600/300/300	ART
31	F	70	INSOMNIA	Recovered fully	No	No	DRUG WITHDRAWN	OFLOXACIN	URINARY TRACT INFEHMA	200MG	ORAL
30	F	47	VOMITTING, DIZZINESS, EPIGASTRIC PAIN	Other	No	No	ORS, ANTIEMETICS ETC [SYMTOMATIC]	PYRIDOXINE	INH PROPHYLASES MANAGEMENT	50MG	P.O	600/300/300, 960MG,300MG	ART, O.I PROPHYLASES,
20	F	44	FEVER	Other	No	No	DRUG WITHDRAWAL	CO-TRIMOXAZOLE	ARV OI PROPHYLASES	960MG	P.O		ART
40	M	58	DRY MOUTH	Other	No	No	DRUG WITHDRAWAL	CO-TRIMOXAZOLE	ARV OI PROPHYLASES	960MG	P.O	600/300/300	ART
50	F	43	FATIGUE, GENERAL BODY WEAKNESS, PAINS, FEVER [HIGH GRADE]	Other	No	No		EFV/3TC/TDF	ART	600/300 300MG	P.O
20	F	47	RASHES ALL OVER THE BODY	Recovered fully	No	No	DRUG WITHDRAWAL	CO-TRIMOXAZOLE	ARV OI PROPHYLASES	960MG	P.O		ART
43	F	50	HIGH BODY TEMPERATURE [FEVER] , LOW BLOOD PRESSURE [HYPOTENSION ], OCCASIONAL HEADACHE	Other	No	No	WITHDRAWAL OF DRUG[SWITCH]/ACT AND PCM	AZT/3TC/NVP	ART	150/300/200	P.O	960	O.I PROPHYLASES
23	F	65	EPIGASTRIC PAIN ,LOW BLOOD PRESSURE	Other	No	No	ESOMEPRAZOLE /CO-CODAMOR	3TC/EFV/TDF	ART	600/300 300	P.O	960MG	O.I PROPHYLASES
62	M	72	FAINTED AFTER DRUG INTAKE	Recovered fully	Yes	Yes	TREATMENT STOPPED	METFORMIN	DIABETIS	1G B.D	P.O	5MG	DIADETIS
	F	77	SEVERE DIARRHOEA	Recovered fully	No	No	DRUG STOPPED	AZITHROMYAN 250MG	PROPHYLAXIS O.I	250MG O.D	ORAL	1 O.D	ART
22	F	79	CHEST PAIN	Other	No	No		EFV/3TC/TDF	ART	600/300/300	P.O	960	O.I PROPHYLASIS,AIDS MGT
38	F	81	EPIGASTRIC PAIN,HEADACHE	Other	No	No		EFV/3TC/TDF	ART	600/300/300	P.O	960	O.I PROPHYLASIS,AIDS MGT
34	M	77	RASHES OVER THE BODY	Other	No	No		CO-TRIMOXAZOLE	O.I PROPHYLAXIS	960MG	P.O	150/300/200	ART,N/A
45	M	89	FEVER, COUGH	Other	No	No		CO-TRIMOXAZOLE	O.I PROPHYLAXIS	960MG	P.O
	F	85	DYSUREA	Other	No	No		EFV/3TC/TDF	ART	600/300/300	P.O	960	O.I PROPHYLASIS,AIDS MGT
55	M	71	PRODUCTIVE COUGH	Other	No	No		CO-TRIMOXAZOLE	O.I PROPHYLAXIS	960MG	P.O		AIDS MGT
35	F	47	PRURITIS	Other	No	No		CO-TRIMOXAZOLE	O.I PROPHYLAXIS	960MG	P.O	600/300/300	ART
30	F	55	COUGH	Other	No	No	SYMTOMATIC TREATMENT	EFV/3TC/TDF	ART	600/300/300	P.O	960	O.I PROPHYLASIS
40	M	44	HEADACHE	Other	No	No	TAB .PCM	CO-TRIMOXAZOLE	O.I PROPHYLAXIS	960MG	P.O		AIDS MGT
35	F	65	RASHES	Other	No	No	SYMTOMATIC TREATMENT	AZT/3TC/NVP	ART	150/300/300	P.O	960	O.I PROPHYLASIS,AIDS MGT
30	F	57	HAEMORRHOID	Other	No	No		EFV/3TC/TDF	ART	600/300/300	P.O	960	O.I PROPHYLASIS,AIDS MGT
60	F	49	RASHES ALL OVER THE BODY	Recovered fully	No			CO-TRIMOXAZOLE	TREATMENT OF O.I [HAART]	960MG	P.O	200/150/200	ARV
30		30	DIARRHOEA	Recovered fully	No	No		EFV+3TC+TDF	ART	600/300/300	P.O
30	F	43	PILE		No	No		CO-TRIMOXAZOLE	TREATMENT OF O.I	960MG	P.O	300/300/600	ART
25	F	41	DYSUREA, FEVER	Recovered fully	No			CO-TRIMOXAZOLE	TREATMENT OF ARV	960	P.O	300/150/200	ART
20	F	41	DIZZINESS, VAGINA RASH, HEARTBURN	Recovered fully	No			TDF+3TC+EFV	ART	300/300/600	P.O
46	M	64	DYSURIA, FEVER	Recovered fully	No	No		CO-TRIMOXAZOLE	HAART	960MG	P.O
30	F	30	HEADACHE,FEVER	Recovered fully	No	No		CO-TRIMOXAZOLE	HAART	960MG	P.O	300/300/600	ONGOING
23	F	51	HEADACHE,FEVER	Other	No	No	PARACETAMOL,ACT	EFV/3TC/TDF	ART	600/300/300	P.O	300MG	PROPHYLAXIS
40	F	41	BLURRED VISION	Recovered fully	No	No	GUTT BETAMETHASONE	EFV/3TC/TDF	ART	600/300/300	P.O	960MG, 300MG	PROPHYLAXIS
32	F	44	INSOMNIA	Other	No	No	AMITROPTYLINE LORATIDINE	EFV/3TC/TDF	ART	600/300/300	P.O	625MG, 500MG	PROPHYLAXIS
25	M	59	TRANSIENT DIGESTIVE SYSTEM DISTURBANCES , ABDOMINAL PAIN, CONSTIPATION	Other	No	No	SYMTOMATIC TREATMENT	3TC/AZT/NVP	ART	300/300/200	P.O	960MG	O.I PROPHYLASIS,AIDS MGT
32	F	48	HEADACHE	Other	No	No		3TC/AZT/NVP	ART	150/300/200	P.O
28	F	57	ABDOMINAL PAINS	Other	No	No		EFV/3TC/TDF	ART	600/300/300	ORAL
35	F	72	TRANSIENT FEVER	Other	No	No	ACT, AMOXIL, PCM	CO-TRIMOXAZOLE	O.I PROPHYLAXIS	960MG	P.O	600/300/300	ART , AIDS MGT
25		49	TRANSIENT FEVER , HEADACHE	Other	No	No		3TC/AZT/NVP	ART	300/300/200	P.O	960MG	PROPHYLAXIS,AIDS MGT
30	F	61	CHEST PAIN [TRANSIET]	Other	No	No		CO-TRIMOXAZOLE	O.I PROPHYLAXIS	960	P.O	300/300/200	ART,AIDS MGT
28	M	61	BODY RASHES	Other	No	No		CO-TRIMOXAZOLE	PROPHYLAXIS	960MG	P.O		ONGOING
27	F	69	TRANSIENT FEVER	Other	No	No	ACT, AMOXIL	CO-TRIMOXAZOLE	O.I PROPHYLAXIS	960MG	P.O	300/300/300	ART, FEVER,FEVER
7	M	19	ANAEMIA, LOW PCV	Recovered fully	No	No	REGIMEN SWITCHED [TO ABC]	AZT/3TC/NVP	ART	60/30/50	P.O	120MG	PROPHYLAXIS
27	F	52	BODY RASHES	Other	No	No		AZT/3TC/NVP	ART	300/300/200	P.O	960MG, 1 O.D	PROPHYLAXIS,AIDS MGT
28	F	36	PRURITIS	Other	No	No		CO-TRIMOXAZOLE	O.I PROPHYLAXIS	960MG	P.O	300MG/- /400MG	PROPHYLAXIS,AIDS MGT, DEWORMING
65	F	43	FEVER, HEADACHE	Other	No	No		CO-TRIMOXAZOLE	O.I PROPHYLAXIS	960MG	P.O		AIDS MGT
30	F	68	CHEST PAIN [TRANSIET IN NATURE]	Other	No	No		EFV/3TC/TDF	ART	600/300/300	P.O	960MG, 1 O.D	O.I PROPHYLASIS,AIDS MGT
32	F	62	FEVER [TRANSIENT], HEADACHE[TRANSIENT]	Other	No	No		AZT/3TC/NVP	ART	300/300/200	P.O		AIDS MGT
25	F	59	HEADACHE	Death	No	No		EFV/3TC/TDF	ART	600/300/300	P.O	960MG	O.I PROPHYLASIS,AIDS MGT
51	M	58	HEARING DISTURBANCES MORE ON THE LEFT EAR, ATAXIA	Other	No	No	CANDIBIOTIC , CETRIZINE	EFV/3TC/TDF	ART	600/300/300	P.O	DROP, 500MG, 5MG	EAR PROBLEM, NOT CLEAR, ITCHING
26	F	72	DIZZINESS	Other	No	No		ISONIAZID 300MG	TB PROPHYLAXIS	O.D [300MG]	ORAL	ONE AT NIGHT DAILY	ART
45	F	83	STOMACH DISTURBANCES , CONSTIPATION	Other	No	No		EFV/3TC/TDF	ART	600/300/300	P.O	960MG, 300MG	PROPHYLAXIS, PROPHYLAXIS
64	M	61	PERIPHERAL NEUROPATHY	Other	No	No		ISONIAZID	PROPHYLAXIS	300MG	P.O	600/300/300	ART
31	F	41	RASHES	Other	No	No		CO-TRIMOXAZOLE	O.I PROPHYLAXIS	960MG	P.O	300/150/200, O.D	ART , AIDS MGT
28	F	48	POLYURIA, POLYDYPSIA	Other	No	No	TO TEST FOR DM	EFV/3TC/TDF	ART	600/300/300	P.O	3,3,2 ,1G TDS ,960MG	FEVER, FEVER, O.I PROPHYLAXIS
55	M	61	TRANSIENT FEVER AND HEADACHE	Other	No	No		AZT/3TC/NVP	ART	150/300/200	P.O	960MG, 1 O.D	PROPHYLAXIS,AIDS MGT
50	F	53	PRURITIS	Other	No	No		CO-TRIMOXAZOLE	O.I PROPHYLAXIS	960MG	P.O
27	F	42	BODY PAIN ,BODY WEAKNESS		No	No	ASTYMIN, SOYA PLUS	3TC/TDF/EFV	ART	300/300/600	P.O	960	O.I PROPHYLAXIS
18 MONTHS	F	6	NOSE BLEEDING , MALASE	Other	No	No	VIT K	EMAL-75NY	MALARIA TREATMENT	75MG	P.O	228MG	TYPHOID FEVER
35	F	57	TRANSIENT FEVER , TRANSIENT HEADACHE	Other	No	No		EFV/3TC/TDF	ART	600/300/300	P.O	960MG, 1 O.D	PROPHYLAXIS,AIDS MGT
27	F	43	TRANSIENT FEVER	Other	No	No		AZT/3TC/NVP	HIV/AIDS	150/300/200	P.O	1 O.D	AIDS MGT
25	F	43	DYSURIA,TRANSIENT FEVER,HEADACHE	Recovered fully	No	No		CO-TRIMOXAZOLE	O.I PROPHYLAXIS	960MG	P.O	600/300/300 ,1 O.D	ART , AIDS MGT
47	M	83	ITCHING SENSATION AROUND THE GENITAL , FEW RASHES	Other	No		SKINEAL SKIN CREAM	EFV/3TC/TDF	ART	600/300/300	P.O	960MG, 20MG, 15ML	O.I PROPHYLAXIS, GASTRIC PAIN ,GASTRIC PAIN
45	M	44	COUGH, EPIGASTRIC PAIN	Other	No			CO-TRIMOXAZOLE	O.I PROPHYLAXIS	960MG	P.O	600/300/300 ,1 O.D	ART , AIDS MGT
40	F	54	HEADACHE [TRASIENT IN NATURE]	Other	No	No		EFV/3TC/TDF	ART	600/300/300	P.O	960MG, 1 O.D	O.I PROPHYLAXIS,AIDS MGT
35	F	69	ABDOMIN DISCOMFPRT	Other	No			EFV/3TC/TDF	HIV/AIDS	600/300/300	P.O	960MG, 1 O.D	O.I PROPHYLASIS,AIDS MGT
60	F	88	DIZZINESS, MALAISE	Recovered fully	No	No		SIMVASTATION	HYPERTENSION	20MG	P.O	5MG, 10MG,2.5 MG, 20MGB.D, 500MGB.D, 1G B.D	HYPERTENSION, ULCER
52	M	53	DIZZINESS,LOSS OF APPETITE	Recovered fully	No		DRUG WITHDRAWN	LISINOPRIL	HYPERTENSION	10MG	P.O	2.5 MG, 75MG	HYPERTENSION
20	F	45	DIZZINESS,RASHES	Recovered fully	No	No		EFV/3TC/TDF	ART	600/300/300	P.O	960MG, 1 O.D	O.I PROPHYLAXIS,AIDS MGT
25	F	50	RASHES	Other	No			AZT/3TC/NVP	ART	300/300/200	P.O	960MG	O.I PROPHYLAXIS
10	F	23	TRANSIENT COUGH, ABDOMINAL PAINS	Other				AZT/3TC/NVP	HIV/AIDS	300/300/200	P.O	960MG, 1 O.D	O.I PROPHYLAXIS,AIDS MGT
23	M	51	DIZZINESS	Other	No	No		EFV/3TC/TDF	HIV/AIDS	600/300/300	P.O	1G TDS	HEADACHE
25	F	48	HEADACHE [TRASIENT],EPIGASTRIC PAIN , DIZZINESS	Other	No	No	PARACETAMOL,ESOMEPRAZOLE	EFV/3TC/TDF	HIV/AIDS	600/300/300	P.O	40MG, 1G TDS, 500	ULCER, HEADACHE, PROPHYLAXIS
58	F	60	BODY WEAKNESS	Recovered fully	No	No		PENICIILIN V	PROPHYLAXIS	500B.D	P.O	40MG O.D ,25MG O.D , 1 O.D, 11 B.D, APPLY B.D	HYPERTENSION,HYPERTENSION ,CAL SUPPLEMENT , ANALGESIA , ANALGESIA
28	F	42	DIZZINESS , COUGH, VOMITTING, EPIGASTRIC PAIN		No	No	ASTYMIN, FLUCONAZOLE, VIT B COMPLEX ,PCM	AZT/3TC/NVP	ART	300/300/200	P.O	1 O.D	AIDS MGT
28	M	60	RASHES	Other	No	No	PREDMISOLONE, FLUCONAZOLE	CO-TRIMOXAZOLE	O.I PROPHYLAXIS	960MG	P.O	1 O.D	AIDS MGT
25	F	48	PERIPHERAL NEUROPATHY, FATIQUE/WEAKNESS	Other	No	No	VITAMIN B6	ISONIAZID	PROPHYLAXIS	300MG	P.O	600/300/300 ,900MG	ART, PROPHYLAXIS
35	F	57	PERIPHERAL NEUROPATHY	Other	No	No	VITAMIN B6	INH [ISONIAZID]	PROPHYLAXIS	300MG	P.O	600/300/300 ,900MG	ART, PROPHYLAXIS
65	M	58	HEADACHE,FEVER	Recovered fully	No	No		EFV/3TC/TDF	HIV/AIDS	600/300/300	P.O	960MG	PROPHYLAXIS
16	F	44	INSOMIA,ANOREXIA	Recovered fully	No	No	DISCONTINUATION OF MEDICINE	EFV/3TC/TDF	HIV/AIDS	600/300/300	P.O
30	M	30	RASHES	Other	No	No		AZT/3TC/NVP	ART	300/300/200	P.O	960MG, 1 O.D	PROPHYLAXIS,AIDS MGT
27	F	36	COUGH, FEVER	Other	No	No		EFV/3TC/TDF	ART	600/300/300	P.O	960MG, 1 O.D	O.I PROPHYLAXIS,AIDS MGT
30	F	30	RASHES	Other	No	No		EFV/3TC/TDF	HIV/AIDS	600/300/300	P.O	960MG, 1 O.D	PROPHYLAXIS,AIDS MGT
35	M	46	ORAL THRUSH	Other	No	No		CO-TRIMOXAZOLE	O.I PROPHYLAXIS	960MG	P.O	1 O.D	AIDS MGT
28	M	28	COUGH, RASHES	Recovered fully	No	No		CO-TRIMOXAZOLE	O.I PROPHYLAXIS	960MG	P.O	1 O.D	AIDS MGT
25	F	58	TRANSIENT FEVER , HEADACHE	Recovered fully	No	No		AZT/3TC/NVP	ART	300/300/200	P.O	960MG, 1 O.D	O.I PROPHYLASIS,AIDS MGT
33	F	61	COUGH	Recovered fully	No	No		EFV/3TC/TDF	ART	600/300/300	P.O	1 O.D	AIDS MGT
26	F	32	DIARRHOEA	Other	No	No		EFV/3TC/TDF	HIV/AIDS	600/300/300	P.O	960MG, 1 O.D	O.I PROPHYLAXIS,AIDS MGT
40	M	54	EPIGASTRIC PAIN	Other	No	No		EFV/3TC/TDF	ART	600/300/300	P.O	960MG, 1 O.D	O.I PROPHYLAXIS,AIDS MGT
48	M	60	HERMORRHOID	Other	No	No		EFV/3TC/TDF	HIV/AIDS	600/300/300	P.O	960MG, 1 O.D	O.I PROPHYLAXIS,AIDS MGT
50	M	58	RASHES	Other	No	No		AZT/3TC/NVP	ART	600/300/200	P.O	960MG, 1 O.D	O.I PROPHYLAXIS,AIDS MGT
50	F	53	ABDOMINAL PAINS, ITCHING	Recovered fully	No	No		CO-TRIMOXAZOLE	O.I PROPHYLAXIS	960MG	P.O
40	F	53	RASHES	Other	No	No		CO-TRIMOXAZOLE	O.I PROPHYLAXIS	960MG	P.O	600/300/300, 1 O.D	AIDS THERAPY , AIDS MGT
25	F	83	ORAL RASHES [TRANSIENT IN NATURE]	Other	No	No	CAPS FLUCONAZOLE	EFV/3TC/TDF	ART	600/300/300	P.O
49	M	63	PROFUSED /SEVERE DIARRHOEA PATIENT WAS OFTEN WEAK AND SLIM	Recovered fully	No	No	SWITCHED TO SECOND LINE	EFV/3TC/TDF	ART	600/300/300	P.O
42	M		GASTROINTESTINAL UPSET WITH STOOLING , BODY PAIN , ORAL THRUST , LOSS OF APPETITE	Recovered fully	No	No	PATIENT GIVEN NYSTATINE ,LOPERAMIDS AND HAEMSHRICS	CO-TRIMOXAZOLE	PREVENTION PROPHYLAXIS OF OPPORTUNIST	2 NODE	ORAL	INDICAMINATE, 2 TID, 2 TID	TREATMENT OF MALARIA , PAIN, STROLING
31	F	52	BODY PAIN, WEAKNESS, FEVER		No	No	ANALGESIC,ANTIBIOTICS AND ANTI MALARIA	LAMIVIDINE/TENOFOUR/EFEVIRENS	TREATMENT OF HIV/AIDS	LATE NIGHT	ORAL	1 O.D,2 NODE, 1 B.D	HEADACHE/BODY PAIN , O.I PROPHYLAXIS, APPETITE STIMULATION
27	M	45	DIZZINESS,HEADACHE , BODY PAIN	Recovered fully	No	No	ANTIMALARIA DRUGS ,ANALGESTIC AND COUNSELLING	EFEVIRENZ 600G	ANTIRETROVIRAL THERAPY	1 NODE	ORAL	2 TABS, 1 TAB	HECIDACH, BODY PAIN
25	M	54	STOMACH UPSET,WEAKNESS	Other	No	No	FLAGYL AND ANTEAD	EFEVIRENZ 300G/KM/TENOFOVIR	HIV/AIDS TREATMENT	1 NODE	ORAL	2 NOCTE	TREATMENT OF O.I
22	F	65	COUGH, CATARRH ,VOMITING ,TINGLING SENSATION ON LEG AND HANDS	Recovered fully	No	No	SYMTOMATIC TREATMENT AND REFERRAL TO DOT CLINIC	LAMIVIDINE/ZIDOVICTURE/NVP	HIV/AIDS TREATMENT	1 B.D	ORAL	2 NOCTE	PREVENTION OF OPPORTUNISTIC INFECTION
14	F	32	HEADACHE,COUGH	Recovered fully	No	No	PATIENT GIVEN ANTIMALARIA,	LAMIVIDINE/ZIDOVICTURE/NVP	TREATMENT OF HIV/AIDS	1 B.D	ORAL	2 NOCTE	FOR PREVENTION OF OPPORTUNISTIC INFECTION
32	F	51	ITCHING WITH RASHES, DROWSINESS, COUGHING		No	No		TDF/3TC/EFV	HIV/AIDS TREATMENT		ORAL	2 TAB O.D	O.I PROPHYLAXIS
33	F	43	RASHES ALL OVER THE BODY WITH ITCHING		No			LAM/NVP/AZT 150/200/300G	ANTIRETROVIRAL	1 TAB TWELVE HLY	ORAL	2 DLY, ONCE DLY
36	F	70	ITCHING AT THE BACK AND THE HANDS	Recovered fully	No			TDF/3TC/EFV	ARVS	ONCE DLY	ORAL	960MG DLY	TO PREVENT O.IS
27	F	40	RASHES, ITCHING					TDF/3TC/EFV	ART	1 O.D	ORAL	960MG DLY, TOPICAL , TWICE	O.I PROPHYLAXIS, ANTIMALARIA , RASHES, RASHES
35	F	43	RASHES ON SKIN, BLISTERS ON THE LIPS		No	No		COTRIMOXAZOLE	OPPORTUNISTIC PROPHYLAXIS	2 NOCTE	ORAL	1 TDS	FOR LOSS OF APPETITE
37	M	53	BODY WEAKNESS, FEVER, SLEEPLESSNESS, COUGH	Recovered fully	No	No		EFEVIRENZ /LEMIDINE/TENIFOUR	FOR HIV TREATMENT	1 AT NIGHT	ORAL	2 NOCTE	O.I PROPHYLAXIS
63	M	64	SKIN RASHES	Other	No	No	EURAX CREAM WAS PRESCRIBED WITH FLUCONAZOLE CAPSULE AND SEPTRIN WAS WITHELD , ALSO PIRITON WAS ADMINISTEREDTON	LAMIVUDINE/NEVIRAPINE AND ZIDOVUDINE	HIV TREATMENT		ORAL		TO PREVENT MOSQUITOES , TO REDUE ITCHING AND RASHES. ANTIBIOTICS
48	F	59	PRURITIS,RASHES,GENERALISED BODY PAIN	Other	No	No	ANTIHISTAMINE,ANAGESICS WAS GVEN TO PATIENT	LAMIVUDINR/ZIDOVUDINE/NEVIRAPINE	TREATMENT OF HIV/AIDS	TBD	ORAL	2B.D,4B.D,4STAT,2BD	FOR TREATMENT OF PAIN AND MALARIA
30	M	68	PURITIS, RASHES , REDDISH FACE AND PEEL OFF, OCCASSIONAL BODY WEAKNESS, OCCASSIONAL DIARRHOEA		No	No	LORATADINE 10MG,CLOTRIMOXAZOLE CREAM	CO-TRIMOXAZOLE	OI PROHPYLAXIS	960MG NOCTE	ORAL	ii tds,i dly	ANTIMALARIA
34	F	43	STIFFNESS OF HAND AND LIMBS, PARATHESIA	Recovered fully	No				PROPHYLAXIS TB	300MG	ORAL	150MG, 200MG, 300MG	HIV
32	F	43	GENERAL BODY WEAKNESS, DIZZINESS	Recovered fully	No			EFEVIRENZ 600G	HIV/AIDS TREATMENT	600 MG O.D	ORAL	300/300/300MG	HIV TREATMENT,HIV TREATMENT, IPT
37	F	63	INSOMNIA,COUGHING ESPECIALLY IN THE NIGHT, HEADACHE	Recovered fully	No				ANTIRETROVIRAL		ORAL	1 O.D
25	M		DIZZINESS	Recovered fully	No			ISONIAZID 300MG	IPT	O.D	ORAL	300/300/200MG	HIV TREATMENT
	M		INSOMNIA, BODY WEAKNESS	Recovered fully	No			EFEVIRENZ 600G	HIV/AIDS TREATMENT	O.D	ORAL	300MG	HIV TREATMENT
35	F	55	PRURITUS, HOT FLUSHES , PYREXIA	Recovered fully				3TC/AZT/NVP	HIV/AIDS TREATMENT	1 TAB O.D	ORAL
33	F	65	INSOMNIA, DIARRHOEA, DIZZINESS	Recovered fully	No			EFEVIRENZ	HIV/AIDS TREATMENT	600 MG O.D	ORAL	300,300.400 MG	HIV TREATMENT,HIV TREATMENT, HIV PROPHYLAXIS
39	F	71	SWEATING DAY AND NIGHT , ANOREXIA ,VOMITTING, STOOLING		No			LOPINAVIR/KITONAUR	HIV	200/50MG	ORAL	300/300MG	HIV
61	F	43	VAGINAL TENDERNESS ,MIGRAINE, BURNING URINATION, UNSTEADY GAIT,URINAL DISCHARGE.	Recovered fully	No				ANTIRETROVIRAL	B.D	ORAL	100MG, 20MG, 1 TDS
42	F	62	BAD DREAM ,INSOMNIA, LOSS OF APPETITE, LOSS OF BODY WEIGHT, GENERAL BODY WEAKNESS, PYREXIA	Recovered fully	No			EFV/3TC/TDF	ANTIRETROVIRAL	1 TAB NOCTE	ORAL
45	F	115	BODY WEAKNESS , PAINS	Other	No				PROPHYLAXIS TB	300MG	ORAL	150MG,200MG,300MG	HIV
30	M		BODY WEAKNESS, PRURITIS OF SCROTAL SACK	Recovered fully	No			ISONIAZID 300MG	IPT	O.D	ORAL	300/300/200MG
33		74	PATCHES ON THE SKIN WITH SKIN DISCOLOURATION	Recovered fully	No			ISONIAZIDE TAB	IPT	300MG	ORAL	300/300/600	HIV
12	M	34.5	PRURITIS WITH BLISTERS ON SKIN, PATCHY SKIN, BLISTERS	Recovered fully	No	No		CARBAMAZEPINE	SEIZURES	200MG	ORAL	600/300/300 MG	ART
53	F	51	PRURITIS , RASHES	Recovered fully	No	No		CO-TRIMOXAZOLE	ART PROPHYLAXIS	300/300/600 MG	ORAL	300/300/600MG	ART
40	F	46	INSOMNIA	Recovered fully	No	No	NO TREATMENT	3TC/TDF/EFV	ART	300/300/600MG	ORAL	960MG	PROPHYLAXIS
32	F		TWO MISCARRIAGE WITHIN FOUR MONTHS CAUSED BY EFV/3TC/TDF BRAND MNUFACTURED BY AUROBINDO PHARMA LIMITED	Recovered fully	No	No		EFV/3TC/TDF	ART	600/300/300MG	ORAL	960MG, 300MG	PROPHYLAXIS,PROPHYLAXIS
32	F	70	EPISTASIS NOSE BLEEDING OCCURED SIX TIMES	Recovered fully	No	No	EUCALYPTUS OIL	TDF/3TC/EFV	ART	300/300/600MG	ORAL	960MG	PROPHYLAXIS
33	F	95	EXCESSIVE WEIGHT GAIN		No	No		EFV/TDF/3TC	ART	600/300/300MG	ORAL	960MG	PROPHYLAXIS
	F	47	JOINT PAIN , TINGLING SENSATION AT HAND	Recovered fully	No				TB TREATMENT	3RHZE/2RH	ORAL	10	WEAKNESS
	M	65	LOCKING OF JAW, UNABLE TO STAND AND WALK , BURNING SENSATION OF THE FEET, SWELLING OF THE FEET	Recovered fully	No			RHZE	TB TREATMENT	4 TAB	ORAL
32	M	60	JOINT PAIN , SWELLING OF ANKLE JOINT	Recovered fully				RHZE	TB TREATMENT	4 TAB	ORAL	3*2,10 MLO.D,10ML*2	HEPATITIS TREATMENT, FOR ANAEMIA,FOR ANAEMIA
	M		INSOMNIA	Other	No			LOPINAVIR/RITONAUR	ANTIRETROVIRAL	200/50MG	ORAL	300/300 MG	ART
	F	24	COUGH,DIZZINESS	Recovered fully	No	No		ACT	ANTIMALARIA	2 B.D	ORAL	1 T.D	FEVER
35	M	60	SEVERE HEART BURNS , INCREASE MACULA PAPULA RASH	Other	No	No		CIPROFIOXACIN	TYPHOID FEVER	500MG	ORAL	200MG	FUNGAL SKIN INFFXW
40	F	70	RESTLESSNESS, INSONMIA, ANOREXIA	Recovered fully	No	No		DIHYDAUATEMISINS	MALARIA	3 CAPSULES	OROLS	625MG, 5MG O.D	TYPHOID HYPERTENSION
32	F	85	SEVERE RASH, ITCHING,SEVERE HEART BURNS	Recovered fully	No	No		PCM	SEVERE HEADACHE	300MG	IV	75MG, 10MG, 20MG	HEADACHE EPIGESTAC
35	F	80	MACULA PAPULAR RASH/ERUPTION , PLURITUS, LEG SWELLING ,BONE PAINS	Other	No			TDF/3TC/EFV	RUD	600/300/300	ORALS
31	F	67	SEVERE DIZZINESS, RASH	Recovered fully				TDF/3TC/EFV	RUD	600/300/300	ORALS	960MG	PROPHYLAXIS
23	F	42	POOR HEARING ON THE LEFT AND RIGHT EARS , GENERAL BODY PAINS	Other	No	No		INJ KANAMYAN	MDR-TB TREATMENT	500MG	INTRAMUSCULAR	750MG, 500MG,500MG,500MG	MDR TAB TREATMENT
52	F	56	PARAESTHESIA OF THE HANDS AND FEET , NACTURIA , GENERALIZED BODY ITCHING	Other	No	No		EFEVIRENZ /LEMIDINE/TENIFOVIR 600MG/300MG/300MG	ANTIRETROVIRAL TREATMENT	1 TAB O.D	ORAL	2 B.D,1 O.D	HAENATINICS
33	M	63	POOR HEARING, CHEST PAIN,BODY ACHE	Other	No	No		INJ KANAMYAN	TREATMENT FOR MDR-TB	1000MG	INTRAMUSCULAR	750MG	MDR -TAB TREATMENT
16	M	47	DIFFICULTY IN HEARING, PITTING PEDAL OEDEMA TO THE KNEE BILATERALY,INCREASE HEART RATE	Other	No	No		INJ KANAMYAN	THERAPY FOR MDR-TB	500MG	INTRAMUSCULAR	500MG,750MG, 500MG	MDR -TB TREATMENT
45	M	53	RINGING SOUND IN EARS , VOMITTING ,GENERAL BODY WEAKNESS	Other	No	No		INJ KANAMYAN	TREATMENT FOR MDR-TB	500MG	INTRAMUSCULAR	750MG, 500MG,500MG	MDR -TB TREATMENT
34	F	62	PRURITIS	Recovered fully	No	No		COTRIMOXAZOLE	PROPHYLAXIS FOR OLS	480MG	ORAL	200MG	ORAL THRUST
2	F	12.5	HEARING IMPAIRMENT	Other	No			GENTAMYCIN	SEPSIS	12MG TDS	INTRAVENOUS	450MG B.D,24MG B.D	MDR MALARIA
25	F		ANAEMIA AND GENERAL BODY WEAKNESS	Recovered fully	Yes	No		LAMIVUDINE/NEVIRAPINE/ZIDOVUDINE	HIV/AIDS TREATMENT	150/200/300MG	ORAL	480MG	PROPHYLAXIS
35	F	52	SWOLLEN LIPS WITH BLISTERS SORE TONGUE	Recovered fully	No	No		FLUCONAZOLE	VAGINAL CANDIDIASIS	200MG O.D	ORAL	400MG TDS, 200MG TDS	VAGINAL CANDIDIASIS
44	F	52	REDNESS OF THE PALM, WHITE PATCHES ON PALM	Recovered fully	No	No		TENOFOVIR /LAMIVUDINE/EFAVIRENZ	HIV/AIDS TREATMENT	300/300/600MG	ORAL	480MG	PROPHYLAXIS
	F	63	HEADACHE,AGITATED, HALLUCINATION, FEELING OF NEGLECT ,TREMBLING OF BOTH HANDS	Other					ANTIRETROVIRAL	1 NOCTE	ORAL	O.D,O.D 1 B.D ,1 O.D	ANTI HYPERTENSIVE ,TYPHOID
36	F	61	SEVERE DIARRHOEA, HEADACHE, LOSS OF APPETITE, GENERALISED BODY WEAKNESS,DIZZINESS		No				ANTIRETROVIRAL	1 AT NIGHT	ORAL	4 B.D, 1G TDS, O.D	ANTI MALARIA ,ANTI MALARIA , O.I PROPHYLAXIS
39	M	95	PAIN, SWELLING OF THE RIGHT BREAST [NIPPLE]		No			TDF/3TC/EFV	ANTIRETROVIRAL	1 AT NIGHT	ORAL	960MG	PREVENTION OF OPPORTUNISTIC INFECTION
	M	53	POPULAR RASHES [SEVERE] ON RIGHT HAND ,ITCHING		No				ANTIRETROVIRAL	1 AT NIGHT	ORAL	O.D,O.D, 1 O.D	ANTI KOCHA ,ANTI KOCHA ,O.I PROPHYLAXIS
	M		DIZZINESS , EAR BLOCK		No			3TC/EFV/TDV	ANTIRETROVIRAL	1 AT NIGHT	ORAL	2 O.D	O.I
	M	69	MACULA PAPULAR LESION ALL OVER THE BODY , COUGH , CATARACT , SEVERE ITCHING	Other	No				ANTIRETROVIRAL	1 NOCTE	ORAL	1 B.D , O.D, O.D	CHEST INFECTION , CHEST INFECTION ,O.I PREVENTION
47	F		RASH [ALL OVER THE BODY]	Recovered fully	No			COTRIMOXAZOLE	O.I	960MG	ORAL	1 DAILY	ANTIRETROVIRAL, SUPPLEMENT, B.P
	F		ULCERS ON SIDE OF LIPS, EARLY MORNING DIZZINESS	Recovered fully	No			EFV/3TC/TDF	ANTIRETROVIRAL	1 O.D	ORAL	1 O.D	O.I PROPHYLASIS
25	F		WEAK ,BACK PAINS	Recovered fully	No			TDF/3TC/EFV	ARV	1 O.D	ORAL	1 O.D	O.I PREVENTION
58	F	58	INSOMNIA		No			EFEVIRENZ /LEMIDINE/TENIFOVIR TABLETS	ARV	1 NOCTE	ORAL	960MG	O.I PROPHYLAXIS
60	F	61	COUGH,INSOMNIA,SKIN RASH,HALLUCINATION ,PEDAL OEDEMA,JAUNDICE, ABDOMINAL PAIN,BREATHLESSNESS, HEPATOMEGELLY,ELEVATED LFT,ANAEMIA	Recovered fully	No				ANTIRETROVIRAL	600 MG NOCTE	ORAL	600/300 MG O.D, 960 MG O.D, 4 B.D	ANTIRETROVIRAL, O.I PREVENTION , ANTIMALARIA
	F		PRURITIS, BODY RASH, SWOLLEN FACE		Yes	Yes		ARTEMEN/ LUMEFAVIOR	MALARIA	4 -STAT ,AFTER 8 HOURS THEN B.D	ORAL	2 O.D , 2 PINTS ,1 O.D	BLOATING OF FACE, HIV
47	M		BLOCKED EAR,HEADACHE		No			COTRIMOXAZOLE 960MG	O.I PREVENTION	1 O.D	ORAL	1 O.D	ARV
	F	12	VOMITING		No			3TC,NVP,AZT	ANTIRETROVIRAL	2.5 B.D	ORAL	240MG O.D	PROPHYLAXIS O.I
47	M	62	HEART BURN ,INSOMNIA	Recovered fully	No			COTRIMOXAZOLE 960MG	PROPHYLAXIS OF O.I	960MG O.D	ORAL	1 O.D, 1 O.D, 1 O.D	HIV/AIDS
38	M	85	DIZZINESS,HEADACHE		No				ANTIRETROVIRAL	1 AT NIGHT	ORAL	960MG O.D ,1G TDS	PREVENTION OF O.I , HEADACHE
35	F	64	DIZZINESS , INSOMNIA		No			TDF/3TC/EFV	ANTIRETROVIRAL	1 AT NIGHT	ORAL	2 B.D	PROPHYLAXIS O.I
	F	54	INSOMNIA, NAUSEA,DIZZINESS	Recovered fully	No	No		TDF/3TC/EFV	ANTIRETROVIRAL	1 AT NIGHT	ORAL	1G B.D, 960 O.D	O.I PROPHYLAXIS
60	F	68	DIARRHOEA, VOMMITING, ABDOMINAL PAIN,DIZZINESS, SEVERE BODY WEAKNESS ,ANAEMIA	Recovered fully	Yes			AZT/3TC/NVP	ANTIRETROVIRAL	1 B.D	ORAL	1 TDS, 400MG TAB ,20MG B.D, 960 MG B.D	ANTIBIOTICS, ANTIULCERS, O.I PREVENTION
	M	46	MOUTH SORE, PERSISTENT VOMITTING, DIARRHOEA,GENERALISED BODY WEAKNESS, SEVERE WEIGHT LOSS,SEVERE ANAEMIA	Recovered fully	Yes			TDF/3TC/EFV	ANTIRETROVIRAL	1 AT NIGHT	ORAL	1G B.D, 500MG O.D, 960MG O.D	CHEST INFECTION , CHEST INFECTION ,O.I PREVENTION
	F	51	PAIN IN THE BREAST, LACTATING	Recovered fully	No			DIHYDAUATEMISINS HYPERTENSION	MALARIA	3 TABLETS EVERY 24HRS	ORAL	10MG O.D, 500MGTDS, 1G TDS	COLD,COUGH,HEADACHE/FEVER
	M	9KG	REDDISH RASHES ALL OVER THE BODY	Recovered fully	No			ARTESUNATE AMODIAQUN	MALARIA	TABLET	ORAL	2.5 ML B.D	FLULCOLD
50	M	58	PRURITIS, PENILE ERYTHERIA, WEAKNESS	Recovered fully	No			SULPHADAXINE PYRMETHAMINE	MALARIA	3 TAB START	ORAL	4 B.D * 3/7,500MG TDS * 5/7	MALARIA, TYPHOID
28	F	47	HEART BURN ,PALPITATION ,WEAKNESS	Recovered fully	No			ERYTHROMYCIN	URTI	500MG B.D * 5/7	ORAL	4 B.D * 3/7, 10MG O.D	MALARIA, HYPERTENSION
36	F	72	CHEST PAIN, TASTY, SWEATING, VOMITING , FAINTING ATTACK	Recovered fully	Yes			ARTEMETHER LUMEFANTINE	MALARIA	4 B.D * 3/7	ORAL	100MG B.D * 3/7 , 15 ML TDS * 1/52	CHEST PAIN, PEPTIC ULCER DISEASE
	F	40	EXCESSIVE SALIVATION , NAUSEA, VOMITING	Recovered fully	No			COTRIMOXAZOLE	URINARY TRACT INFECTION	960MG	ORAL	100MG	UTI
31	F	80	REDNESS AND SWOLLEN OF INFECTION SITE, PAINS ,DIZZINESS	Recovered fully	No			ARTEMETHER	MALARIA	160MG START 80MG B.D * 3/7	I NTRAMUSCULAR	3 TAB STAT, 1G TDS* 3/7	MALARIA, PAINS
43	F	62	SEVERE ITCHING WITH INFLAMMMINATION, SKIN ERRUPTION ALL OVER THE BODY	Recovered fully	No			AZT/3TC/NVP	ARV THERAPY	300/150/200 MG B.D	ORAL	1G PRN , 400MG TDS	HEADACHE, GENERAL BODY PAINS
59	F	77	SKIN ERUPTION ALL OVER THE BODY WITH SERIOUS ITCHING ,FEVER AND FAINTNESS	Recovered fully	No			TDF/3TC/EFV	ARV THERAPY	300/300/600MG NOCTE	ORAL	960MG O.D	O.I PROPHYLAXIS
60	M	70	SHARP PIN-LIKE SENSATION ON THE FEET , OCCASSIONAL SWELLING OF FEET ,EXCESSIVE YAWNING ,OCCASSIONAL JOINT PAIN AFTER WALKING SHORT DISTANCE		No			TDF/3TC/EFV	ARV THERAPY	300/300/600MG NOCTE	ORAL	960MG O.D	O.I PROPHYLAXIS, MALARIA TREATMENT
48	M	71	LOSS OF FEELING IN THE LEG AFTER PROLONGED SITTING WITH TINGLING SENSATION IN THE FINGERS	Recovered fully	No			TDF/3TC/EFV	ARV THERAPY	300/300/600MG NOCTE	ORAL	1 O.D	BOOST PCV , INCREASE APETITE
60	F	57	ITCHING ALL OVER THE BODY WITH SWELLINGS WHICH DRY OFF OVER TIME	Recovered fully	No			TDF/3TC/EFV	ARV THERAPY	1 NOCTE	ORAL	960MG O.D, 1G PRN	O.I PROPHYLAXIS, BODY PAINS /HEADACHE
35	F	60	RASHES ALL OVER THE BODY,ITCHING AND FEELING UNCOMFORTABLE	Life Threatening	No		PREDISOLONE	COTRIMOXAZOLE	TO PREVENT RVD	960MG	ORAL	300MG,400MG,500MG	TB
46	F	60	HYPERSENSITIVITY REACTION	Life Threatening	No		I.M DEXAMETHAZONE,PREDISONE TABS,AMOXYL CAP	COTRIMOXAZOLE	COUGH	480MG	ORAL	5MG,50MG	HYPERTENSION
24	M	60	HYPERSENSITIVITY REACTION	Life Threatening	No		PREDISOLONE TABS	ARTHEMETER	MALARIA	20MG	ORAL	30MG	DIABETTE
35	F	64	ANEMIA (VERY LOW PCV)	Life Threatening	Yes	Yes		ZIDOVUDINE,LAMIVUDINE,NEVIRAPINE	HIV/AIDS	300MG	ORAL	20MG,200MG	HYPERTENSION,LOW BLOOD
30	F	67	RASHES,PRURITIS,UNCOMFORTABLE,	Life Threatening	No		PREDISOLONE,PIRITON	PIRITON	IPT	250MG	ORAL	200MG	PREGNANCY PAIN
65	M	65	ANGIOEDEMA	Life Threatening	No	No	PREDISOLONE,LORATIDE DOUBLE DOSE	LISINOPRIL	HYPERTENSION	10MG	ORAL		HYPERTENSION
47	F	65	DIZZINESS,WEAKNESS	Other	No			ATEZOMOR	HIV/AIDS	300MG	ORAL	300MG	HIV/AIDS
30	M	55	JOINT PAINS ON FINGERS AND TOES AND FINGERLING	Other	No		PARACETAMOL AND PYNILIXINE	PYNILIXINE	MANAGEMENT OF TB	FDC	ORAL	600MG,1600MG,1100MG	TB
33	F	62	INSOMIA	Recovered fully	No	No	CHANGE OF REGIMEN TO AZT/3TC/NVP	EFAVIRENZ	HIV	600MG	ORAL	300MG	HIV
36	M	51	INSOMNIA WITH METABOLIC ACIDOSIS	Other	No	No		TENOFIVIR	HIV	300MG	ORAL	600MG,300MG,960MG	HIV/AIDS
41	F	53	MULTIPLE LOCALISED SWEELING PAINFULL ALL OVER THE BODY,FEVER	Other	No		WATCHFULL VISITING	LOPANOIR,RETONOIR	HIV	200MG,500MG	ORAL	960MG,150MG,300MG	HIV
41	F	64	DARK DISCOLRATION OF THE TONGUE	Other	No	No	NO TREATMENT GIVEN	TENOFOVIR	HIV	300MG	ORAL	600MG,300MG	HIV
50	F	73	TIGHT SENSATION IN THE HANDS AND FEET	Other	No	No	TABS PYRIDEXINE 50MG DAILY	ISONIAZIDE	TB	375MG	ORAL	750MG,2MG,137MG	TB
50	F	47	SKIN RASHES AND ITCHING	Other	No		TAB LORATIDINE 10MG	NEVIRAPINE	HIV	200MG	ORAL	300MG,150MG	HIV
28	F	53	SEVERE JOINT PAIN	Other	No	No	TABS IBUPROFEN 400MG	PYRAZINAMIDE	TB	1200MG	ORAL	450MG,225MG,825MG	TB
42	M	82	LOSS OF HEARING	Recovered with disability	No			KANANONYAN	MANAGEMENT OF TB	1G	INTRAMUSCULAR	750MG	ANALGESIC,ANTIMALARIA
24	M	52	TINGLING AND SHOCKING SENSATION IN BOTH HANDS AND FEET,LOOS OF APPETITE	Other			TABS PYRIDOXIN 100MG DAILY	ISONIAZIDE	TB	300MG	ORAL	600MG,1600MG,1100MG	TB
45	F	61	BREAST LUMP AND SWELLING,DIFFICULTY IN HEARING	Recovered with disability	No	No	NO ON TREATMENT AND NO HEARING AID	KANAMYCIN	MANAGEMENT OF TB	1G	INTRAMUSCULAR	750MG	MANAGEMENT OF TB
24	F	55	RINGING AND FULLNESS IN THE EAR	Recovered fully	No	No	PATIENT REDUCED THE DOSE OF THE DRUG SHE SUSPECTED	CYCLEVESINE	MANAGEMENT OF TB	750MG	ORAL	1G,150MG,750MG	MANAGEMENT OF TB
45	M	56	LOSS OF HEARING	Recovered with disability	No			KANAMYCIN	MANAGEMENT OF TB	1G	INTRAMUSCULAR	750MG	MANAGEMENT OF TB
60	M	60	DIFFICULTY IN HEARING	Other	No		NOT ON TREATMENT AND NOT WITH HEARING AID	KANAMYCIN	MANAGEMENT OF TB	1G	INTRAMUSCULAR	750MG	MANAGEMENT OF TB
	M	70	RINGING SOUND IN THE EAR,DIFFICUITY IN HEARING	Other	No			KANAMYCIN	MANAGEMENT OF TB	IG	INTRAMUSCULAR	750MG	MANAGEMENT OF TB
45	F	61	BREAST LUMP(LEFT), DIFFICULTY IN HEARING		No	No	NOT CURRENTLY BEEN TREATED	KANOMYAN	MDR -TB	1G	INTRAMUSCULAR	750150	MDR-TBMDR-TB
30	F		CONTINUOUS ITCHING, RASHES	Recovered fully	No		ANTI HYSTAMIN DRUGS	EFV/3TC/ZDF	ARV	600/DAILY,500/DAILY	ORAL	960MG/DAILY	ANTIBIOTICS FOR O.TS
34	F		GENERAL WEAKNESS OF THE BODY,VOMITTING	Recovered fully	No			EFV/3TC/ZDF	ART	600/DAILY,300/DAILY	ORAL	960MG/DAILY	ANTIBIOTICS FOR O.TS
38	F		DIFFICULTY AND IRREGULAR BREATHING,RESTLESSNESS,BREATHLESS,UNEASINESS	Recovered fully	No		ASCOREX WAS STOPPED AND PATIENT IMMEDIATELY FELT BETTER	SALBUTANUT BROMHEXINE MENTHOL,GUARFEREXIN	COUGH	10ML/TDS	ORAL	1G/TDS	ANALGESIC,ANTIMALARIA
36	F		SWOLLENESS,STIFFNESS,SLIGHT PAIN IN THE LEG(LEFT),INABILITY TO BEND THE LIMB,OEDEMETUS,SIGHT PAIN	Other	No		PHYSIOTHERAPY FLEXING,RUBBING OF THE METHYLSAKICALE BALM,ADMINISTERED NUERORITE TABLETS	PENTAGENINE	RELIEF OF PAIN IN THE SICKLE CELL	30MG	SUBCUTANEOUS
40	F		HOTNESS OF THE BODY,EXCESSIVE DIARRHOEA,DEHYDRATION AND WEAKNESS OF THE BODY	Recovered fully	Yes		I.V REHYDRATION EYE CHANGED DRUG TO AZT/3TC/NVP	EFV/3TC/ZDF	HIV/AIDS	600/DAILY,300/DAILY	ORAL	960MG/DAILY	ANTIBIOTICS (UPPER INFECTION)
	F		PERSITANT HEADACHE, LIGHT HEADACHE,GENERAL BODY MALAISE	Other	No		HAEMATIMICS,ANALGESTIC WERE PRESCRIBED	LAM/NEV/ZID	ART	ONE BID	ORAL	960MG/DAILY	ANTIBIOTICS FOR O.TS
30	F	88	EPIGATRIC PAIN	Recovered fully	No			EFAVIRENZ	RVD	1 DAILY	ORAL	1 BD	RVD
34	M	78	DIZZINESS,DROWSINESS,VOMITTING	Recovered fully	No			EFV/3TC/ZDF	POST EXPOSIVE PROPHYLEXIS	300/300/600/DAILY	ORAL
32	F		DIZZINESS,HEADACHE	Recovered fully	No			AMILORIDE/HCIZ	HYPERTENSION		ORAL	30MG
32	F	58	INTERNAL HEAT,ABDOMINAL BLEEDING,HEART BURN	Recovered fully	No			METROMIN	DIABETES	500MG	ORAL	30MG.50MG
47	M	58	DIZZINESS	Recovered fully	No			EFAVIRENZ	RETROVIRAL DISEASE	1 DAILY	ORAL	1 BD
1YEAR 8 MONTHS	M	10	DIZZINESS,VOMITTING,WEAKNESS OF THE BODY,LOSS OF APPETITE	Recovered fully	No			ARTESUNATE,AMLODIPINE	UNCOMPLICATED MALARIA	100/270	ORAL	100MG/200MG
33	F	97	PRURITIS,INSOMIA,ANXIETY	Recovered fully	No			EFV/3TC/ZDF	ANTIRETROVIRAL	1 DAILY	ORAL	1 DAILY	BODY ITCHING
23	F	46	RASHES,NAUSEA,PRURITIS	Recovered fully	No			COTRIMOXAZOLE	PROPLAXUS	480MG	ORAL
49	F	62	RASHES,BODY ITCHING,BLISKERS ON THE MONTH.WEIGHT LOSS,SKIN PEELING LIKE HOT WATERWAS POURED	Recovered fully	Yes			COTRIMOXAZOLE	PROPLAXUS	480MG	ORAL
36	F	52	RASHES,BODY ITCHING,BLISKERS ON THE MONTH.WEIGHT LOSS,SKIN PEELING LIKE HOT WATERWAS POURED	Recovered fully	No			COTRIMOXAZOLE	PROPLAXUS	480MG	ORAL
27	F	62	RASHES,ANOREXIA,DIZZINESS,HEADACHE,NAUSEA,VOMITTING	Recovered fully	No			COTRIMOXAZOLE	PROPLAXUS	480MG	ORAL
36	F	57	RASHES,VOMITTING,WEIGHT LOSS,LOOS OF APPETITE	Recovered fully	No			EFV/3TC/ZDF	RVD	300/300/600/DAILY	ORAL
32	F	64	MALAISE, FEVER ,HEADACHE	Recovered fully	No			TRUVADA /EFAVIRENSE	RVD	1DLY	ORAL
35	F	85	INTERNAL HEAT	Recovered fully	No			TDF/3TC/EFV	RVD	1DLY	ORAL
	F	55	SNEEZING,PRURITIS	Recovered fully	No			CO-TRIMOXAZOLE	TREATMENT OF CO INFECTIONS	960MG	ORAL	300/300/600	HIV TREATMENT
5	F	17.5	EDEMA,GENERALIZED BODY RASHES,PRURITIS	Recovered fully	No		TAB LORATIDINE 5MG DAILY	NEVIRADIPINE	HIV/AIDS	113MG	ORAL	150MG,70MG	HIV/AIDS
35	F	53	AMENORRHEOA	Other	No			LAMIVODINE	HIV/AIDS	200MG	ORAL	200MG/600MG	HIV/AIDS
30	M	70	ABDONOMAL FAT, EXCESSIVE WEIGHT GAIN(INITIAL WEIGH OF 55G)		No			TRUVADA	HIV/AIDS	300MG/600MG	ORAL	600MG	HIV/AIDS
47	M	55.7	WEAK ERECTION	Other	No		MINEX 1 BD FOR 3 MONTHS	EFAVIREZ	HIV/AIDS	600/DAILY,300/DAILY	ORAL	300MG	HIV/AIDS
50	M	87	WEAK ERECTION	Other	No		MINEX 1 BD FOR 3 MONTHS	EFAVIRENZ	HIV/AIDS	600/DAILY	ORAL	300MG	HIV/AIDS
2 MONTHS	M		HYPERPIGMENTED,LEGIONS ON BOTH UPPER LIMBS	Other	No
37	F	78	TITANUS,ARTHRALGIA,PAPULAR RASHES	Recovered fully	No			CIPROFLOXACIN	TYPHOID	500MG	ORAL
7	F	20	GENERALIZED BODY WEAKNESS,GENERALIZED PAPULAR RASHES,PRURITIS	Recovered fully	No			ARTEMETER/LOMEFRADINE	MALARIA	3 TAB BD	ORAL
2	M	10	RASHES, PRURITIS	Other	No				IMMUNIZATION	10ML	ORAL
11	M	29	GENERALIZED BODY WEAKNESS, BLURRED VISION	Recovered fully	No			ARTESUNATE,AMLODIPINE	MALARIA	3 TABS	ORAL
35	M	60	SEVERE HEADACHE,DIZZINESS,IMSONIA,STRANGE DREAMS	Recovered fully	No		DRUGS WERE SUBTITUTED WITH COMBIVIR/NEVIRAPINE	DISOPROXIL FUMAZATE	HIV	600MG	ORAL	960MG,300MG,300MG	HIV/AIDS
47	M	58	GENERAL BODY PAIN,SWOLLEN LIPS	Other	No		SUSPECTED DRUG WAS SUBSITITUTED WITH LOSATRAN	LISINOPRIL	HIV	10MG	ORAL	10MG,80MG,50MG	HIV
18	M	60	WOUND ON THE LIP,BLEEDING LIPS,SWOLLEN LIPS,NAUSEA,VOMITTING	Other	No		SUSPECTED DRUG WAS SUBSITITUTED WITH LOSATRAN	LISINOPRIL	MANAGEMENT OF CKD AND HIV	10MG	ORAL	200MG,10MG,600MG	MANAGEMENT OF CKD AND HIV
43	M	67	HEARING LOSS,RINGING IN THE EAR,NAUSEA,VOMITTING	Recovered fully	No		QUINNE WAS WITHOLD IMMEDIATELY	QUINNE SULPHATE	MANAGEMENT OF SEVERE MALARIA	1.2G	INTRAVENOUS	1.2G,1G,2G	MANAGEMENT OF FEVER
46	F	43	BLURRED VISION	Recovered fully	No		ETHAMBUTEL WAS DISCONTINUED,PREDVISOLE TAB,VITAMIN A AND E PRESCRIBED	ETHAMPREBUTER HCL	MANAGEMENT OF TB	275MG	ORAL	150MG,75MG,400MG	MANAGEMENT OF TB
40	F	40	INABILITY OF WALK	Recovered fully	No		PENTAZOCIN INJ.30MG,OXYTOCIN 10 I.U	PROSTAGLADIN	MANAGEMENT OF ABORTION	200MG	SUBLINGUAL	200MG,5MG,1.2MG	MANAGEMENT OF ANAEMIA,U.T.I
29	F	83	GENERAL LOSS OF CONCENTRATION,GENERAL BODY WEAKNESS,CONFUSION	Recovered fully	No	No	ATENOLOL WAS WITHOLD	ATENOLOL	MANAGEMENT OF CCF PRCM	25MG	ORAL	40MG,25MG,5MG	MANAGEMENT OF CCF PRCM
35	M	55	TOO MUCH SLEPING IN THE DAY TIME	Other	No		PATIENTSHIFTED TAKING SEPTRIN IN THE MORNING TO NIGHT TIME	COTRIMOXAZOLE	PROPLAXUS	960MG	ORAL	600MG,300MG,300MG	HIV
40	M	72	MULTIPLE RASHES IN THE SKIN AND THE FACE	Recovered fully	No	No	SUSPECTED DRUG WAS WITHDRAWN IMMEDIATELY	COTRIMOXAZOLE	PROPLAXUS O.I	960MG	ORAL	150MG,300MG,200MG	HIV
35	F	47	SEVERE HEADACHE,INSOMNIA	Other	No		TABS PCM FOR 7 DAYS,COUNSEL PATIENT ON THE DRUG	NEVIRAPINE	MANAGEMENT OF HIV	200MG	ORAL	960MG,150MG,300MG	MANAGEMENT OF HIV
60	M	78	SEVERE ABDOMINAL PAIN,RESTLESSNESS	Recovered fully	No	No	SEPTRIN WAS IMMEDIATELY WITHDRAWN	COTRIMOXAZOLE	PROPLAXUS O.I	960MG	ORAL	200MG,150MG,300MG	MANAGEMENT OF HIV
30	F	48	PRURITIS,DISCOLORATION OF THE SKIN,NECK SWELLING,MOUTH RASHES	Other	No	No	SEPTRIN WAS IMMEDIATELY STOPPED	COTRIMOXAZOLE	PROPLAXUS O.I	960MG	ORAL	300MG,150MG,600MG	MANAGEMENT OF HIV
32	F	70	TOO MUCH SLEEPING BOTH IN DAY AND IN THE NIGHT,DIZZINESS	Recovered fully	No	No	PATIENT WAS REASURED OF THE SIDE EFFECT OF THE DRUG	EFAVIRENZ	MANAGEMENT OF HIV	600/DAILY	ORAL	960MG,300MG,300MG	O.I PROPHYLAXUS AND HIV
45	F	54	MULTIPLE SKIN RASHES,PRURITIS	Other	No	No	SWIFTED TO COMBIVIR	EFAVIRENZ	MANAGEMENT OF HIV	600/DAILY	ORAL	960MG,300MG,300MG	O.I PROPHYLAXUS AND HIV
61	M	77	SKIN RASHES,PRURITIS,WOUND IN THE ELBOWS	Other	No	No	SEPTRIN WAS DISCONTINUED	COTRIMOXAZOLE	PROPLAXUS O.I	960MG	ORAL	600MG,300MG,300MG	MANAGEMENT OF HIV
50	M		PRURITIS	Recovered fully	No	No	SEPTRIN WAS DISCONTINUED	COTRIMOXAZOLE	PROPLAXUS O.I	960MG	ORAL	600MG,300MG,300MG	MANAGEMENT OF HIV
45	F	85	PRURITIS,DISCOLORATION OF THE SKIN,PEELING OF SKIN	Other	No	No	PIRITON TABS,SUPERVOMIN TABS	COTRIMOXAZOLE	PROPLAXUS O.I	960MG	ORAL	200MG,300MG,300MG	MANAGEMENT OF HIV
33	F	52	DIZZINESS,STRANGE DREAMS,GENERAL BODY WEAKNESS,PRURITIS	Recovered fully	No	No	PATIENT WAS REASURED OF THE SIDE EFFECT OF THE DRUG	EFAVIRENZ	MANAGEMENT OF HIV/AIDS	600MG	ORAL	960MG,300MG,300MG	O.I PROPHYLAXUS AND HIV
40	F	56	DROWSINESS,INSOMNIA	Other	No	No	PATIENT WAS REASURED OF THE SIDE EFFECT OF THE DRUG	EFAVIRENZ	MANAGEMENT OF HIV/AIDS	600MG	ORAL	960MG,300MG,300MG	O.I PROPHYLAXUS AND HIV
35	F	55	ATHRALGIA	Recovered fully	No	No		EFAVIRENZ	MANAGEMENT OF HIV	600MG	ORAL	960MG,300MG,300MG	O.I PROPHYLAXUS AND HIV
26	F	58	DIZZINESS,FORGETIFULNESS,HOTNESS OF THE BODY	Recovered fully	No	No	PATIENT WAS REASURED OF THE SIDE EFFECT OF THE EFAVIRENZ	EFAVIRENZ	MANAGEMENT OF HIV	600MG	ORAL	960MG,300MG,300MG	O.I PROPHYLAXUS AND HIV
58	M	64	PRURITIS,RESTLESSNESS	Recovered fully	No	No	SEPTRIN WAS IMMEDIATELY STOPPED	COTRIMOXAZOLE	PROPLAXUS O.I	960MG	ORAL	200MG,150MG,300MG	MANAGEMENT OF HIV
30	F	60	PRURITIS	Recovered fully	No	No	SEPTRIN WAS IMMEDIATELY WITHDRAWN	COTRIMOXAZOLE	PROPLAXUS O.I	960MG	ORAL	600MG,300MG,300MG	MANAGEMENT OF HIV
52	F	51	PRURITIS	Recovered fully	No	No	SEPTRIN WAS SUSPENDED	COTRIMOXAZOLE	PROPLAXUS O.I	960MG	ORAL	300MG,300MG,600MG	MANAGEMENT OF HIV
45	F	38	LOSS OF HEARING FROM BOTH EARS,STRANGE DREAMS	Other	No	No		EFAVIRENZ	MANAGEMENT OF HIV	600MG	ORAL	960MG,300MG,300MG	O.I PROPHYLAXUS AND HIV
55	F	71	PROFUSE SWEATING AT NIGHT	Other	No	No		EFAVIRENZ	MANAGEMENT OF HIV	600MG	ORAL	960MG,300MG,300MG	O.I PROPHYLAXUS AND HIV
25	F	54	DIZZINESS,BLURRED VISION	Recovered fully	No	No	SUSPECTED DRUG WAS WITHOLD AND RESTARTED AGAIN	EFAVIRENZ	MANAGEMENT OF HIV	600MG	ORAL	960MG,300MG,300MG	O.I PROPHYLAXUS AND HIV
25	F	66	SHORTNESS OF BREATH,SEVERE CHEST PAIN	Recovered fully	No		DRUGS WERE SUBTITUTED WITH COMBIVIR/NEVIRAPINE	EFAVIRENZ	MANAGEMENT OF HIV	600MG	ORAL	960MG,300MG,300MG	O.I PROPHYLAXUS AND HIV
40	M	50	ULCERATION OF BOTH LOWER AND UPPER LIPS,BLEEDING LIPS,REDISH PATCHES IN THE PALM	Other	No	No	DRUG SUBSTITUTE WITH ABC/3TC/TFV.ORAL NYSTATIN,FLUCONAZOLE	NEVIRAPINE	MANAGEMENT OF HIV	200MG	ORAL	960MG,150MG,300MG	O.I PROPHYLAXUS AND HIV
32	F	70	TOO MUCH SLEEPING BOTH IN THE DAY AND NIGHT,DIZZINESS	Recovered fully	No	No	PATIENT WAS REASURED OF THE SIDE EFFECT OF THE DRUG	EFAVIRENZ	MANAGEMENT OF HIV	600MG	ORAL	960MG,300MG,300MG	O.I PROPHYLAXUS AND HIV
40	M	50	ULCERATION OF LOWER AND UPPER LIPS, BLEEDING LIPS, REDDISH PATCHES IN THE PALM	Other	No		SUBSTITUTED WITH ABC/3TC/EFV, ORAL NYSTATIN ,FLUCONAZOLE	NEVIRAPINE	MGT. OF HIV	200MG	ORAL	960MG,150MG,300MG	O.IS PROHPYLAXIS,MGT OF HIV, MGT OF HIV
61	M	77	DIZZINESS,NIGHT MARES(STRANGE DREAMS), LOSS OF APPETITE	Other	No		TRUVADA EFAVIRENZ WAS CHANGED TO COMBIPAK	EFAVIRENZ	MGT. OF HIV	600MG	ORAL	960MG,300MG,300MG	O.IS PROPHYLAXISS,IPT, MGT OF HIV
50	M		PRURITIS	Recovered fully	No		SEPTRIN WAS DISCONTINUED	COTRIMOXAZOLE	O.IS PROPLAXIS	960MG	ORAL	600MG,300MG,300MG	MGT. OF HIV,MGT. OF HIV,MGT. OF HIV
61	M	77	SKIN RASHES, PRURITIS,WOUNDS IN THE ELBOWS	Other	No		SEPTRIN WAS DISCONTINUED	CONTRIMOXAZOLE	O.IS PROPHYLAXIS	960MG	ORAL	600MG,300MG,300MG	MGT. OF HIV,MGT. OF HIV,MGT. OF HIV
45	F	54	RASHES, PRURITIS	Other	No	No	SWITCHED TO COMBIPAK	EFAVIRENZ	MGT. OF HIV	600MG	ORAL	960MG,300MG,300MG	O.IS PROPHYLAXIS,MGT. OF HIV,MGT. OF HIV
61	M	77	DIZZINESS, NIGHTMARES(STRANGE DREAMS), BLURRED VISION LOSS OF APPETITE	Other	No		TRUVADA EFAVIRENZ WAS CHANGED TO COMBIPAK	EFAVIRENZ	MGT. OF HIV	600MG	ORAL	960MG,300MG,300MG	O.IS PROPHYLAXIS,IPT,MGT. OF HIV
40	F	56	DROWSINESS, INSOMNIA	Other	No		PATIENT WAS REASSURED ON THE DRUGS SIDE EFFECTS	EFAVIRENZ	MGT. OF HIV	600MG	ORAL	960MG,300MG,300MG	O.IS PROPHYLAXIS,MGT. OF HIV, MGT. OF HIV
33	F	52	DIZZINESS, STRANGE DREAMS, GENERAL BODY WEAKNESS,PRURITIS	Recovered fully	No		PATIENT WAS REASSURED ON THE SIDE EFFECTS OF THE DRUGS	EFAVIRENZ	MGT. OF HIV	600MG	ORAL	960MG,300MG,300MG,	O.IS PROPHYLAXIS,MGT.OF HIV, MGT. OF HIV
45	F	85	PRURITIS, DISCOLORATION OF THE SKIN, PEELING OF THE SKIN	Other	No		TABS PIRITON 1DAILY AND SUREVOMIN TABLETS 1 DAILY	COTRIMOXAZLE	O.IS PROPHYLAXIS	960MG	ORAL	300MG,300MG,200MG	MGT.OF HIV,MGT.OF HIV,MGT.OF HIV
47	M	58	GENERAL BODY PAINS, SWELLING OF THE LIPS	Other	No		SUSPECTED DRUG (LUSINOPRIL)WAS SUBSTITUTED WITH LOSARTAN	LISINOPRIL	MANAGEMENT OF CKD +HYPERTENSION	10MG	ORAL	100MG,80MG,5MG	MANAGEMENT OF CHRONIC KIDNEY DISEASE
18	M	60	WOUND ON THE LIPS, BLEEDING FROM THE LIPS, SWOLLEN LIPS	Other	No		SUSPECTED DRUG (LISINOPRIL) WAS SUBSTITUTED WITH LOSARTAN	LISINOPRIL	MANAGEMENT OF CKD AND HYPERTENSION	10	ORAL	200MG,10MG,600MG	MANAGEMENT OF C.K.D AND HYPERTENSION
43	M	67	RINGING IN THE EAR, NAUSEA, VOMITING	Recovered fully	No	No	QUININE WAS WITHOLD IMMEDIATELY	QUININE SULPHATE	MGT. OF MALARIA	1.2G	INTRAVENOUS	1.2G,1G,1G	MGT. OF SUSPECTED LASSA FEVER
35	M	55	TOO MUCH SLEEPING IN THE DAY	Other	No		PATIENT SWITCHED TAKING SEPTRIN IN THE MORNING TO NIGHT TIME	COTRIMOXAZOLE	O.IS PROPHYLAXIS	960MG	ORAL	600MG,300MG,300MG	MAGT. OF HIV,MGT.OF HIV,MGT.OF HIV
35	M	55	ATHRALGIA	Recovered fully	No			EFAVIRENZ	MGT.OF HIV	600MG	ORAL	600MG	O.IS PROPHYLAXIS, MGT.OF HIV,MGT.OF HIV
52	F	51	PRURITIS	Recovered fully	No		SEPTRIN WAS SUSPENDED	COTRIMOXAZOLE	O.I PROPHYLAXIS	960MG	ORAL	300MG,300MG,6003MG	MGT.OF HIV,MGT.OF HIV,MGT.OF HIV
45	F	38	LOSS OF HEARING FROM BOTH EARS, STRANGE DREAMS	Other	No			EFAVIRENZ	MGT.OF HIV	600MG	ORAL	960MG,300MG,300MG	MGT OF O.IS,MGT.OF HIV,MGT.OF HIV
55	F	71	PROFUSE SWEATING AT NIGHT	Other	No			EFAVIRENZ	MGT.OF HIV	600MG	ORAL	960MG,300MG,300MG	O.IS PROPHYLAXIS,MGT.OF HIV,MGT.OF HIV
29	F	83	GENERAL LOSS OF CONCENTRATION, GENERAL BODY WEAKNESSS, CONFUSION	Recovered fully	No	No	SUSPECTED DRUG (ATENOLOL)WITHOLD	ATENOLOL	MGT. OF CCF 2DEGREE PPCM	25MG	ORAL	40MG,25MG,5M	MGT.PF CCF 2DEGREE PPCM,MGT.PF CCF 2DEGREE PPCM,MGT.PF CCF 2DEGREE PPCM
25	F	54	DIZZINESS, BLURRED VISION	Recovered fully	No	No	SUSPECTED DRUG WAS WITHOLD AND RE-STARTED AGAIN	EFIVARENZ	MGT.OF HIV	600MG	ORAL	960MG,300MG,300MG	O.IS PROPHYLAXIS,MGT. OF HIV, MGT. OF HIV
46	F	43	BLURRED VISION	Recovered fully	No	No	ETHAMBUTOL WAS DISCONTINUED . TABS. PREDNISOLONE, VIT.A$E PRESCRIBED	ETHAMBUTOLHCL	MGT. OF TUBERCULOSIS	275KG	ORAL	150MG,75MG,400MG	MGT. OF TB,MGT. OF TB,MGT. OF TB
35	F	60	SEVERE HEADACHE ,DIZZINESS,INSOMNIA, STRANGE DREAMS	Recovered fully	No	No	DRUGS WERE SUIBSTITUTED WITH COMBIVIR /NEVIRAPINE	EFAVIRENZ	MGT. OF HIV	600MG	ORAL	960MG,300MG,300MG	PREVENTION OF OPP. INFECTION,MGT. OF HIV, MGT.OF HIV
30	F	48	PRURITIS, DISCOLORATION OF THE SKIN, NECK SWELLING, MOUTH RASHES	Other	No	No	SEPTRIN WAS IMMEDIATELY STOPPED	COTRIMOXAZOLE	O.IS PROPHYLAXIS	960MG	ORAL	300MG,150MG,600MG	MGT.OF HIV,MGT.OF HIV,MGT.OF HIV
25	F	66	SHORTNESS OF BREATH, SEVERE CHEST PAIN	Recovered fully	No	No	DRUGS WERE SUBSTITUTED WITH COMBIVIR /NEVIRAPINE	DISOPROXIL FUMARATE	MANAGEMENT OF HIV	600MG	ORAL	960MG,300MG,300MG	PREVENTION OF OPPOR. INFECTION, MGT OF HIV,MGT OF HIV
45	M		MACULA PAPULAR RASH,PRURITIS	Recovered fully	No	No		3TC/NVP/AZT	HIV		ORAL
39	M	37	GYNAECOMASTIA	Recovered fully	No		WITHDRAWAL OF ARV		HIV	600MG	ORAL
20	F	32	BURINIG SENSATION ON THE SOLE OF THE FEET,TINGLING SENSATION	Other	No			AZT/3TC/NVP	HIV	300MG	ORAL
5	M	18	RASHES ON FACE AND SCALP	Other	No	No	STOP TAKING COTRIM TAB	SEPTRIN	ARV	450MG	ORAL
6	F		RASHES ON FACE AND SCALP	Other	No			LAMIVUDINE,AZT,NVP	HIV	200MG	ORAL
28	M	50	HEARING IMPAIRMENT	Recovered fully	No		KANAMYCIN INJECTION CHANGED TO CAPREOMYCIN INJECTION	KANAMYCIN	MDR TB	1G	INTRAMUSCULAR	750MG	MDR TB
20	M	58	BLEEDING FROM INJECTION SITE(THROMBOCYTOPEITIS)	Recovered fully	No	No	VITAMIN K 10MG	PROTHRORAMIDE	MDR TB	1G	ORAL	750MG,1G,2G	MDR TB
55	M	52	PARTIAL DEAFNESS	Recovered fully	No	No	KANAMYCIN INJECTION CHANGED TO CAPREOMYCIN INJECTION	KANAMYCIN	MDR TB	1G	ORAL	750MG	MDR TB
24	M	38	TINGLING SOUND IN EARS,HEARING IMPAIRMENT	Recovered fully	No		KANAMYCIN INJECTION CHANGED TO CAPREOMYCIN INJECTION	KANAMYCIN	MDR TB	1G	INTRAMUSCULAR	750MG	MDR TB
64	M	62	TOTAL DEAFNESS, LOOSE OF GAIT	Recovered with disability	No	No	KANAMYCIN INJECTION CHANGED TO CAPREOMYCIN INJECTION	KANAMYCIN	MDR TB	1G	INTRAMUSCULAR	160MG,750MG,750MG	MDR TB
62	M	54	IRRATIONAL BEHAVIOUR,RESTLESSNESS	Recovered fully	No	No	TAB ARTANE 5MG DAILY	CYCLOSERINE	MDR TB	150MG	ORAL	750MG	MDR TB
30	M	49	IRRATIONAL BEHAVIOUR,RESTLESSNESS,INSOMIA,TALKING TO HIMSELF	Other	No		TAB ARTANE 5MG DAILY,TAB HALOPERIDOL 5MG	CYCLOSERINE	MDR TB	500MG	ORAL	750MG,500MG	MDR TB
30	M	52	ATHRALGIA	Recovered fully	No	No	TAB TRAMADOL 50MG	PYRAZINAMIDE	MDR TB	1600MG	ORAL	750MG	MDR TB
61	M	66	PAINFUL SWOLLEN BREAST	Other	No		TAB TRAMADOL	PROTHRORAMIDE	MDR TB	750MG	ORAL	750MG	MDR TB
62	M	63	INDIGESTION	Recovered fully	No	No	PARACETAMOL	PYRAZINAMIDE	MDR TB	1600MG	ORAL	750MG	MDR TB
50	F	37	HEARING LOSS	Recovered fully	No		KANAMYCIN INJECTION CHANGED TO CAPREOMYCIN INJECTION	KANAMYCIN	MDR TB	750MG	INTRAMUSCULAR	750MG	MDR TB
30	M	59	HEARING LOSS,RINGING IN THE EAR,NAUSEA,VOMITTING	Recovered fully	No		KANAMYCIN INJECTION CHANGED TO CAPREOMYCIN INJECTION	KANAMYCIN	MDR TB	1G	INTRAMUSCULAR	750MG	MDR TB
45	M	50	TINNITUS,PRONOUNCED HEARING IMPAIRMENT	Recovered fully	No		KANAMYCIN INJECTION CHANGED TO CAPREOMYCIN INJECTION	KANAMYCIN	MDR TB	750MG	INTRAMUSCULAR	750MG	MDR TB
35	M		TINNITUS,PARTIAL HEARING IMPAIRMENT	Recovered fully	No		KANAMYCIN INJECTION CHANGED TO CAPREOMYCIN INJECTION	KANAMYCIN	MDR TB	1G	INTRAMUSCULAR	750MG	MDR TB
60	F	43	HEARING IMPAIRMENT	Recovered fully	No		KANAMYCIN INJECTION CHANGED TO CAPREOMYCIN INJECTION	KANAMYCIN	MDR TB	750MG	INTRAMUSCULAR	750MG	MDR TB
43	M	49	HEARING IMPAIRMENT	Recovered fully	No		KANAMYCIN INJECTION CHANGED TO CAPREOMYCIN INJECTION	KANAMYCIN	MDR TB	750MG	INTRAMUSCULAR	750MG	MDR TB
45	M	49	TINNITUS,HEARING IMPAIRMENT	Recovered fully	No	No	KANAMYCIN INJECTION CHANGED TO CAPREOMYCIN INJECTION	KANAMYCIN	MDR TB	1G	INTRAMUSCULAR	750MG	MDR TB
51	M		TINNIFUS,HEARING IMPAIRMENT	Recovered fully	No	No	KANAMYCIN INJECTION CHANGED TO CAPREOMYCIN INJECTION	KANAMYCIN	MDR TB	1G	INTRAMUSCULAR	750MG	MDR TB
28	F	55	PRURITIS	Other	No	No	CHLORPHENIRAMINE TABLET	RIFAMPICIN	TB	600MG	ORAL		TB
30	M	49	NAUSEA,VOMITING,LOSS OF APPETITE	Recovered fully	No	No	IV FLUIDS 5%,NORMAL SALINE	PROTHRORAMIDE	MDR TB	500MG	ORAL	750MG,1200MG,500MG	MDR TB
28	M	50	SWELLING AND TENDERNESS OF LEFT BREAST	Other	No	No	TAB TRAMADOL	PROTHRORAMIDE	MDR TB	750MG	ORAL	750MG,1200MG,500MG	MDR TB
55	M	52	GENERAL BODY PAIN	Recovered fully	No	No	PARACETAMOL	PYRAZINAMIDE	MDR TB	1600MG	ORAL	750MG	MDR TB
64	M	62	SEVERE ANAEMIA	Recovered fully	No	No	TRANSFUSED WITH BLOOD	PROTHRORAMIDE	MDR TB	500MG	ORAL	160MG,750MG,750MG	MDR TB
30	M	49	TINNITUS,HEARING IMPAIRMENT	Recovered fully	No	No	KANAMYCIN INJECTION CHANGED TO CAPREOMYCIN INJECTION	KANAMYCIN	MDR TB	750MG	INTRAMUSCULAR	750MG	MDR TB
32	M	52	HEARING IMPAIRMENT	Recovered fully	No	No	KANAMYCIN INJECTION CHANGED TO CAPREOMYCIN INJECTION	KANAMYCIN	MDR TB	1G	INTRAMUSCULAR	750MG	MDR TB
62	M	63	TINNITUS,HEARING IMPAIRMENT	Recovered fully	No	No	KANAMYCIN INJECTION CHANGED TO CAPREOMYCIN INJECTION	KANAMYCIN	MDR TB	1G	INTRAMUSCULAR	750MG	MDR TB
62	M	54	TINNITUS,HEARING IMPAIRMENT	Recovered fully	No	No	KANAMYCIN INJECTION CHANGED TO CAPREOMYCIN INJECTION	KANAMYCIN	MDR TB	1G	INTRAMUSCULAR	750MG	MDR TB
22	M	68	TINNITUS,HEARING IMPAIRMENT	Recovered fully	No	No	KANAMYCIN INJECTION CHANGED TO CAPREOMYCIN INJECTION	KANAMYCIN	MDR TB	1G	INTRAMUSCULAR	750MG	MDR TB
61	M	66	EXCESS AND PROLONGED DIARRHOEA	Other	No	No	METRONIDAZOLE,TETRACYCLINE	LEVOFLOXACIN	MDR TB	750MG	ORAL	750MG	MDR TB
45	M	49	TINNITUS,HEARING IMPAIRMENT	Recovered fully	No	No	KANAMYCIN INJECTION CHANGED TO CAPREOMYCIN INJECTION	KANAMYCIN	MDR TB	1G	INTRAMUSCULAR	750MG	MDR TB
45	F	50	BITTER TASTE	Other	No	No	PSYCHOTHERAPY,REASSURANCE	PROTHRORAMIDE	MDR TB	750MG	ORAL	750MG,1200MG,500MG	MDR TB
35	F	37	NAUSEA	Other	No	No	RESCHEDULING OF MEDICATION AND MEAL	PROTHRORAMIDE	MDR TB	750MG	ORAL	750MG	MDR TB
60	F	45	HEART BURN,PALPITATION	Recovered fully	No	No	ANTACID,DIACEPAM,GELUSEL TAB	PROTHRORAMIDE	MDR TB	750MG	ORAL	1200MG,750MG,500MG	MDR TB
30	F	49	PSYCHOSIS	Other	No	No	CHLORPHENIRAMINE TABLET	CYCLOSERINE	MDR TB	500MG	ORAL	750MG	MDR TB
30	M	49	ELECTROLYTE IMBALANCE(HYPOKALEMIA AND HYPONATREMIA)	Other	No	No	DIETARY MODULATION	CAPREOMYCIN	MDR TB		ORAL	750MG	MDR TB
43	M	60	ITCHING,PALPITATION	Recovered fully	No	No	PIRITON TAB	LEVOFLOXACIN	MDR TB	750MG	ORAL	1G,1200MG,750MG	MDR TB
62	M	65	PERSISTANT AND INTENSE VOMITING	Recovered fully	No	No	METOCHLORAMINE,PRAMIDE	PROTHRORAMIDE	MDR TB	750MG	ORAL
35	F	40	BLOOD STAINED SPUTUM	Recovered fully	No	No	VITAMIN K TABLETS	PROTHRORAMIDE	MDR TB	750MG	ORAL	750MG	MDR TB
32	M	58	BLOOD STAINED SPUTUM	Recovered fully	No	No	VITAMIN K TABLETS	PROTHRORAMIDE	MDR TB	750MG	ORAL	750MG	MDR TB
45	F	60	PRURITIS	Recovered fully	No	No	TAB LORATIDINE	CAPREOMYCIN	MDR TB	750MG	INTRAMUSCULAR	750MG	MDR TB
42	M	50	FREQUENT STOOLING	Recovered fully	No	No	LOPERAMIDE	PASA-PARA-AMINU SALYCHE ACID	MDR TB	8G	ORAL	400MG,60MG,200MG	MDR TB
42	M	50	INSOMIA	Recovered fully	No	No	DIAZEPAM TAB	LINEZOHOL	MDR TB	600MG	ORAL	400MG,200MG,8G	MDR TB
62	M	63	HEARING IMPEARMENT	Recovered fully	No	No	KANAMYCIN CHANGED TO COMPROMYCIN	KANAMYCIN	MDR. TB	1G	IM INJECTION	750MG,750MG,750MG	MDR TB, MDR TB,MDR TB
61	F	66	HEARING IMPAIRMENT,TINNITUS	Recovered fully	No	No	KANAMYCIN INJ WAS CHANGED TO CAPREOMYCIN INJ	KANAMYCIN	MDR TB	1G	INJ	1G,1G,750MG	MDR TB,MDR TB,MDR TB
28	F	55	PRURITUS	Other	No	No	CHLORPHENIRAMINE TABLET	RIFAMPICIN	SUSCPTIBLE TB	600MG	ORAL		SUSCPT. TB,SUSCPT. TB, SUSCPT. TB
28	M	50	SWELLING TENDERNESS OF LEFT BREAST
61	M	66	HEARING IMPAIRMENT	Recovered fully	No	No	KANAMYCIN INJECTION CHANGED TO CAPREOMYCIN INJECTION	KANAMYCIN	MDR TB	1G	1IM INJECTION	1G,1G,750MG	MDR. TB,MDR. TB,MDR.TB
22	F		RASHES,EXFOLIATIVE DERMATITIS	Recovered fully	Yes	Yes	DENAMETHAZINE 12MG,PRN TAB,CEFURON 500MG,PCM	EFAVIRENZ,LAMIVUDINE,TENOFOVIR,COTRIMOXAZOLE	ARV,OIs	DAILY DOSE	ORAL	DAILY	PAINS
28	F		INTERNAL HEAT,DIZZINESS,SWEATING, SOUR MOUTH,INCREASED BREATHING	Recovered fully	No	No	DRUG WAS CHANGED TO AZT,3TC,NVP ON 04/04/2016	TDR,3TC,EFV	PMTCT		ORAL	DAILY	ROUNTINE DRUGS
20	M	60	ATHRALGIA,PERIPHERAL NEUROPATHY	Recovered fully	No	No	TABS PYRIDEXINE 50MG DAILY,DICLOFENAC 500MG	REFAMPEXINE,ISONIDE,PYRAMIDAZOLE	PULMONARY TB	DAILY	ORAL	DAILY	JOINT PAINS
28	F		COUGH INTENSITY INCREASED, WEAKNESS,DIZZINESS,INSOMNIA,BODY HEAT,BODY PAIN,ANAEMIA	Recovered fully	Yes	Yes	ARV WAS STOPPED BUT WAS RE-INITIATED AFTER 2 WEEK OF ANTI TB	RIFAMPECIN	PULMONARY TB	4 DAILY	ORAL	DAILY	ARV,ANAEMIA
27	M		VOMITING,PAIN,ATHRALGIA	Recovered fully	No	No	PROMETHAAZINE TAB,DICLOFENAC	RIFAMPICIN,PYRAMIDE	PULMONARY TB	3 TABLETS DAILY	ORAL	500MG	PREVENTION OF PERIPHERAL NEUROPHATY
34	F	60	NAUSEA,WEAKNESS	Recovered fully	No	No		ARTESUNATE	ANTI MALARIA	4 TABLETS START THEN 2 TABLETS EVERY 12 HOURS	ORAL	DAILY	ROUNTINE DRUGS
32	F		ATHRALGIA	Recovered fully	No	No	DICLOFENAC TABLETS 50MG BID OR 5 DAYS	RIFAMPICIN,PYRAMIDE	ABDOMINAL TB	4 DAILY	ORAL	100MG	ARV
40	F	65	ITCHING,VOMITING	Recovered fully	No	No	LORATIDINE 10MG	RIFAMPICIN,PYRAMIDE	PULMONARY TB	DAILY	ORAL	1 TAB DAILY	PREVENTION OF PERIPHERAL NEUROPHATY
36	F		JOINT PAINS ESPECIALLY OF THE KNEE	Other	No	No	CAP TRAMADOL 50MG DAILY	RIFAMPICIN,PYRAMIDE	ABDOMINAL TB	4 TABLETS DAILY	ORAL	BID	HIV/AIDS.ANTI HYPERTENSIVE
62	M	59	WEAKNESS,TIREDNESS	Other	No	No	SON ADVICED TO COME FOR DRUG		TB	400MG	ORAL
67	M	48	ITCHING,WORSENING NIGHT,INTERNAL NECK SWELLING WITH DISCHARGE	Other	No	No	SENT FOR GENE EXPERT	RHZE	TB	400MG	ORAL
48	M	67	WEIGHT REDUCTION	Other	No	No	TO REFER TO GENE EXPERT	RHZE	TB	150MG	ORAL
31	F	69	NAUSEA,HEADACHE,FATIQUE,DIZZINESS	Recovered fully	No	No	SENT FOR PCV,PSYCOTHERAPHY	EFAVIRENZ,LAMIVUDINE,TENOFOVIR	PMTCT	300MG	ORAL	5MG	ROUNTINE DRUGS
21	F	57	HEADACHE,EXCESSIVE THIRST,WEAKNESS	Other	No	No	PSYCHOTHERAPY,PATIENT COMMENSE ON MANAGEMENT	EFAVIRENZ,LAMIVUDINE,TENOFOVIR	PMTCT	600MG	ORAL
31	F	54	INSOMNIA,WEAKNESS,DIZZINESS	Other	No	No	PSYCHOTHERAPY,PLACED ON HEAMOTOSIS,FOLIC ACID	EFAVIRENZ,LAMIVUDINE,TENOFOVIR	PMTCT	600MG	ORAL
59	F		PERSISTENT COUGH	Other	No	No	DISCONTINUE THE PARTICULAR DRUG(LISINOPRIL)	LISINOPRIL	HYPERTENSION	10MG	ORAL	20MG,500MG,10MG	HYPERTENSION,DIABETES
60	F	62	EXTENSIVE RASHES OVER THE TRUNK	Recovered fully	No	No	ORAL ANTIBIOTICS	ISONIAZIDE	IPT	300MG	ORAL	0.5MG,300MG	HIV,VACINATION
46	F	52	GENERALISED ITCHING ALL OVER THE BODY,RASHES	Recovered fully	No	No	IV HYDROCORTISONE 200MG	OMEPRAZOLE	PVD	20MG	INTRAVENOUS	1G,250MG,400MG	ACUTE PVD
44	F	105	CHEST PAIN,EXCESSIVE VOMITING,OCCATIONAL DIZZINESS	Other	Yes	No	TVF	ISONIAZIDE	IPT	300MG	ORAL	960MG	OIs
26	F	76	DIZZINESS,BLURRING OF VISION, EXCESSIVE VOMITING	Recovered fully	No	No	IV PROMETHAZINE	PENTAZOCINE		500MG	INTRAVENOUS
48	F	65	RINGING SENSATION, HEARING IMPAIRMENT ON THE LEFT SIDE OF THE EAR	Other	No	No	PREVIOUS TREATMENT BEEN EXPOSE TO STREPTOMYCIN AND KANANYCIN	KANAMYCIN	MDR TB	750MG	IM	1G,250MG,2G	MDR TB
30	M	45	NAUSEA , VOMITING,HEADACHE, GENERAL WEAKNESS	Other	No	No	METOCLOPRAMIDE 10MG WAS ADMITTED AND VITAMIN B	PROTHRORAMIDE	MDR TB	500MG	ORAL	750MG	MDR TB
36	M	60	MILD HEARING LOSS IN THE EARS , ITCHING ON THE RIGHT EAR	Other	No	No	KANAMYCIN WAS SWICTED TO CAPROMYCIN	KANAMYCIN	TREATMENT OF MDR TB	750MG	INTRAMUSCULAR	750MG,250MG,200MG	FOR TREAMENT OF MDR TB
36	M	63	PERIPHERAL NEUROPATHY, GENERAL WEAKNESS	Other	No	No	VITAMIN B(PYRIDOXIN)THE DOSE IS REDUCED	CYCLOSERINE	TREATMENT OF MDR TB	750MG	ORAL	750MG,250MG,200MG	FOR TREAMENT OF MDR TB
36	M	60	RINGING SENSATION IN THE RIGHT EAR	Other	No	No	KANAMYCIN WAS SWICTED TO CAPROMYCIN	KANAMYCIN	TREATMENT OF MDR TB	750MG	INTRAMUSCULAR	750MG,250MG,200MG	FOR TREAMENT OF MDR TB
70	M	51	MILD HEARING,LOST OF APPETITE,GENERAL BODY PAIN,METALIC TEST, POOR VISION	Other	No	No	KANAMYCIN WAS SWICTED TO CAPROMYCIN	KANAMYCIN	TREATMENT OF MDR TB	750MG	INTRAMUSCULAR	500MG,1.5G,750MG	FOR TREAMENT OF MDR TB
25	M	51	RINGING SENSATION AT THE SIDE OF THE EAR, MILD LOSS HEARING	Other	No	No	KANAMYCIN WAS SWICTED TO CAPROMYCIN	KANAMYCIN	TREATMENT OF MDR TB	750MG	INTRAMUSCULAR	500MG,1.5G,750MG	FOR TREAMENT OF MDR TB
35	F	34	NAUSEA,VOMITING,GENERAL WEAKNESS, LETHARGY, ANAEMIA	Other	No	No	SHE WAS PLACED ON PLECIL AND IBRUPROFEN THEN SHE WAS TRANSFUSE WITH ONE PANT OF BLOOD FOLLOWING HAEMATOSIS	PYRAZINAMIDE	TREATMENT OF MDR TB	1.5G	ORAL	500MG,1.5G,750MG	FOR TREAMENT OF MDR TB
30	M	33	GENERAL WEAKNESS, PAIN ON HIS PALM, DELIRIUM, ANAEMIA	Other	No	No	PYRIDOXINE WAS INCREASE,CYCLOSERINE WAS STOP TO 250MG AND TRANSFUSE WITH ONE PANT OF BLOOD	CYCLOSERINE	TREATMENT OF MDR TB	500MG	ORAL	500MG,1.5G,750MG	FOR TREAMENT OF MDR TB
39	M	65	NAUSEA,VOMITTING,BACK PAIN, EPIGASTRIC PAIN,DISCOMFORT, LOST OF APPETITE	Other	No	No		PROTHIONAMIDE	TREATMENT OF MDR TB	750MG	ORAL	1G,2G,750MG	FOR TREAMENT OF MDR TB
40	M	62	MILD HEARING LOSS	Other	No	No	KANAMYCIN WAS SWICTED TO CAPROMYCIN	KANAMYCIN	TREATMENT OF MDR TB	750MG	INTRAMUSCULAR	750MG,2G,250MG	FOR TREAMENT OF MDR TB
	M		MILD HEARING LOSS	Other	No	No	KANAMYCIN WAS SWICTED TO CAPROMYCIN	KANAMYCIN	TREATMENT OF MDR TB	750MG	INTRAMUSCULAR	750MH	FOR TREAMENT OF MDR TB
47	F	62	RINGING SENSATION, RASHES ALL OVER HER BODY, SWOLLEN OF THE LEFT LEG	Other	No	No	STOPPED THE MEDICATION AND VITAMIN B IS INCRESED	ISONIAZIDE	TREATMENT OF MDR TB			300MG,500MG,2G	TREATMENT OF PULMONARY TB
47	F	62	RINGING SENSATION, RASHES ALL OVER HER BODY, SWOLLEN OF THE LEFT LEG	Other	No	No	STOPPED THE MEDICATION AND VITAMIN B IS INCRESED	ISONIAZIDE	TREATMENT OF EXTRA PULMONARY TB	300MG	ORAL	300MG,500MG,2G	TREATMENT OF EXTRA-PULMONARY TB
27	M	62	INCOHERENT SPEECH, CONGESTION OF THE CHEST	Other	No	No	VIATMIN B INCRESED	CYCLOSERINE	TREATMENT OF MDR TB	750MG	ORAL	750MG	TREATMENT OF PULMONARY TB
	M		MILD HEARING LOSS OF THE LEFT EAR				KANAMYCIN WAS SWITCH TO CAPREOMYCIN	KANAMYCIN	TREATMENT OF MDR TB	750MG	INTRAMUSCULAR	750MG,750MG,750MG,750MG	TREATMENT MDR TB
5	F	20	RASHES ALL OVER THE BODY,ITCHING,CONJUCTIVITY	Recovered fully	No	No	ANTI HISTAMINE	COTRIMOXAZOLE	PCR PROPALAXIS	240ML/5ML BD	ORAL
32	F	85	GENERAL BODY WEAKNESS,VOMITTING(PROTRACTED), DIZZINESS	Recovered fully	Yes	No	WITHDRAWAL OF MEDIATION,IV FLUIDS	HYDROCORTIZONE,PIPERTINE	ANTI MALARIA	40/320MG DAILY	ORAL	1 TEASPOON	POOR APPETITE
19	M	70	ABDOMINAL CRAMPS WITH PASSAGE OF LOOSE NON BLOODY,NON MUCOID STOOL	Recovered fully	No	No	ORS,TBA HYOSCINE	ARTHEMETHER-LUMEFRATINE	ANTI MALARIA	80/480MG BD	ORAL	50MG BD	ANALGESIC
27	M	76	VOMITTING ABOUT 5 BOUTS,ABDOMINAL CRAMPS	Recovered fully	Yes	No	ANTIEMETIC,INTRAVENOUS FLUIDS	ARTESUNATE	ANTIMALARIA	60MG	INTRAVENOUS	1G	ANTIPYRETIC
15	F	62	DIZZINESS,VERTIGO	Recovered fully	No	No	DISCONTINUE MEDICATION	ARTHEMETER	ANTI MALARIA	1600MG	INTRAMUSCULAR
24	M	70	JAUNDICE	Other	Yes	Yes	IVF,HAEMATOLOGICAL IN=NVESTIGATIONS,TRANSFERED TO NHA	SULFADOMINE	ANTI MALARIA	3 TABLETS	ORAL		ANTIMALARIA
60	F	57	SERIOUS PAINS IN THE LEG , TINGLING OF THE PALMS	Other	No	No		AZT/3TC/NVP	MANAGEMENT OF HIV	300MG,200MG,150MG	ORAL
80	F		PEPPERY SENSATION OVER THE BACK	Recovered fully	No	No		AMILORIDE HCL/HYDROCHLOROTHAMIDE	HYPERTENSION	50MG	ORAL
3	F	15	RASHES ALL OVER THE BODY	Other	No			COTRIMOXAZOLE	PROPHYLAXIS	240MG	ORAL
40	F	60	PERSISTENT VOMITTING, WEAKNESS,ANAEMIA,BITTERNESS OF TONGUE,BONE PAINS	Recovered fully	Yes	No	TRANSFUSED WITH BLOOD,DRIPS AND OTHER TREATMENT	EFAVIRENZ	MANAGEMENT OF HIV	600MG,300MG	ORAL
40	M	60	POOR SLEEP,DIZZINESS THAT IS PERSISTENT,FEELING OF FAINTING	Other	No	No		EFV/3TC/ZDF	MANAGEMENT OF HIV	600MG,300MG	ORAL
19	F	55	MULTIPLE SKIN LEISURE(MOSTLY HEAD,FACE AND TRUNK),BLIZTERS CONTAINING PURILENT,ULCER STICKING TO CLITORIS	Other	Yes	No	STOP ALL DRUG,GIVE IV FLUID,BATH BODY		PNEUMONIA		INTRAMUSCULAR	1 CAPSULE,2 TABLETS	TREATMENT OF PNEUMONIA
38	F		SEVERE HEADACHE,VOMITTING,ALTERED SENSATION,HEMIPARESIS,SWEATING	Other	Yes	No	IV FLUID,FLUCONAZOLE,PARACETAMOL,DIAZEPAM FOR SPASMS	FANSIDAR	ANTI MALARIA
54	F	79	GENERALISED BODY WEAKNESS, PAINS,VOMITTING,EXCESSIVE FEVER,DIZZINESS,FAINTING SENSATION,POOR APPETITES	Death	No	Yes	STOP TREATMENT,PROMETHAZINE,DICLOFENAC		PNEUMONIA		ORAL	500MG,10MG	VOMITTING
41	F	68	MULTIPLE VESICULAR RASHES,INCREASE TEMPERATURE,COUGH(SPURUM STAINS WITH BLOOD)	Life Threatening	Yes	No	STOP ALL DRUG,GIVE IV FLUID		INFECTION		ORAL	100MG,200MG	MANAGEMENT OF FEVER
33	M	60	SEVERE RASHES, ITCHING OF THE SKIN	Other	No	No	DISCONTINUE SEPTRIN COMPLETELY,TAB LORATIDINE 10MG	COTRIMOXAZOLE	INFECTION	960MG	ORAL	600MG,300MG,300MG	MANAGEMENT OF HIV
38	M	60	GENERALISED ITCHING OF THE BODY	Other	No	No	TAB LORATIDINE 10MG DAILY,DISCONTINUE SEPTRIN	COTRIMOXAZOLE	OPTIMISTIC INFECTION	960MG	ORAL	300MG,300MG,600MG	MANAGEMENT OF HIV
28	F	68	ANAEMIA	Recovered fully	Yes	No	AZT,3TC,NVP,TDF	AZT,3TC,NVP	MANAGEMENT OF HIV	1 BD	ORAL	960MG	PROPHYLAXUS
39	F	58	SEVERE ANAEMIA WITH JOINT PAINS AROUND THE KNEEL AND ANKLE	Recovered fully	Yes	No	BLOOD TRANSFUSION,SWITCH TO EFAFIRENZ	AZT/3TC/NVP	MANAGEMENT OF HIV	1 BD	ORAL	960MG	OPTIMISTIC INFECTION
30	F	68	HYPERSENSITIVITY REACTION WHICH INCLUDE SEVER ITCHING OF THE HANDS AND SWELLING OF THE LIPS	Recovered with disability	No	No		TINDAZOLE	AMEBIASIS	2G	ORAL	1G/TDS	AMEBIASIS
55	M	69	RASHES AROUND THE MOUTH AND UNDER THE TONGUE	Other	No	No	PATIENT WAS SWITCH TO COLORED COMBIPACK,3TC,NVP	AZT/3TC/NVP	MANAGEMENT OF HIV	1 BD	ORAL	960MG DAILY	PROPHYLAXUS
16	F	29	SEVERE NAUSEA, VOMITTING, WEAKNESS OF THE BODY,RASHES ON THE FACE AND HANDS,	Other	No	No	SWITCH TO TEVOFOIR,LAMIVUDINE,ATEZAVIR,SEPTRIN	TDF/EFV/3TC	HIV		PO	960MG	ART
20	F	51	MILD MASCULAR PAPULAR RASHES IN THE FACE	Other	No	No	STOP SEPTRIN COMPLETELY	COTRIMOXAZOLE	PROPLAXUS O.I	960MG	ORAL	600MG,300MG,300MG	ARV
30	F		SEVERE NAUSEA,VOMITTING,DIZZINESS AND WEAKNESS OF THE BODY	Recovered fully	No	No	WE CHANGED THE DRUG TO COMBIPACK(AZT,3TC,NVP)	TDF/EFV/3TC	PMTCT		PO	1BD,2BD	HEAMATINIC,PROPHYLAXIS
30	F	44	RASHES ON HAND AND FACE,LOSS OF APPETITE AND WEIGHT LOSS	Recovered fully	No	No	SWITCH TO AZT/3TC/ATAZANAIR,RITONAIR	TDF,EFV,3TC	MANAGEMENT OF HIV		PO	960MG	O.I PROPHYLAXUS AND HIV
20	M	47	SEVERE MASCULAR PAPULAR RASHES ON THE FACE AND BACK	Other	No	No	STOP SEPTRIN COMPLETELY	COTRIMOXAZOLE	OPTIMISTIC INFECTION	960MG	PO	300MG DAILY	MANAGEMENT OF HIV
25	F	54	RASHES ON THE FACE,HANDS,AND ALL OVER THE BODY	Other	No	No	STOP SEPTRIN COMPLETELY	COTRIMOXAZOLE	OPTIMISTIC INFECTION	960MG	PO		MANAGEMENT OF HIV
46	F	71	REDDISH AND WHITISH DISCHARGE FROM BOTH EYES	Other	No	No	COMBIPACT SWITCH TO EFV,3TC,TDF	AZT/3TC/NVP	MANAGEMENT OF HIV	1 BD	ORAL	960MG,300MG,300MG	PROPHYLAXUS
76	F	29	SEVERE NAUSEA ,VOMITING, WEAKNESS OF THE BODY,RASHES ON THE FACE AND HANDS	Other	No	No		TDF/EFV/3TC	MANAGEMENT OF HIV		PO	960MG	ARV
30	F		SEVERE NAUSEA, VOMITTING,DIZZINESS AND WEAKNESS OF THE BODY	Recovered fully	No	No		TDF/EFV/3TC	PMTCT		PO	1BD	PROPHYLAXUS
55	M	69	RASHES FOUND AROUND THE MOUTH AND UNDER THE TONGUE	Other	No	No		3TC/NVP/AZT	HIV	1 BD	PO	1BD	ARV
20	F	51	MILD MASCULAR PAPULAR RASHES ON THE FACE	Other	No	No		COTRIMOXAZOLE	PROPLAXUS	960MG	ORAL		ARV
13	F	39	HYPERPIGMENTATION OF THE NAIL AND DARKENS LIP	Other	No	No		COMBIVIR	HIV	1 BD	PO	1 DAILY	O.I PROPHYLAXUS AND HIV
30	F	57	GENERALISED RASHES ON THE BODY WITH ITCHING SENSATION	Other	No	No	PIRITON TABLET,CLOTRIMOXAZOLE,BETAMESINE	EFAVIRENZ	HIV	600MG	ORAL	300MG,960MG	HIV
27	M	63	BREAST ENLARGEMENT(GYNAECOMASTIA)ON BOTH BREASTS	Other	No	No	PATIENT COUNCEL TO STOP HERBS	HERBAL MIXTURE	IMMUNE BOOSTER		ORAL	8M,10MG,960MG	O.I PROPHYLAXUS AND ITCHING
26	F	75	GENERALIZED BODY RASHES WITH ITCHING SENSATION,RASHES IS CONCENTRATED ON THE BCK AND UPPER ARMS,RASHES APPEAR WITH DARK PATCHES	Other	No	No	PREDINOSOLE TABLETS,CHLROPHENIRAMINE TABLET	EFAVIRENZ	HIV INFECTION	600MG	ORAL	300MG,960MG	HIV INFECTION
25	F	54	WHITISH PATCHES ON THE NECK AND CHEST(DISCOLORATION)THAT ITCHED OCCATIONALLY	Other	No	No	CHLORPHENIRAMINE TABLET,COTRIMOXAZOLE	TDF/3TC/EFV	HIV INFECTION	600MG,300MG	ORAL	960MG	O.I PROPHYLAXUS
30	M	50.5	SWOLLEN FACE,GENERALISED BODY ITCHING,VOMITTING,ABDOMINAL PAIN,FEVERISH FEELING	Recovered fully	No	Yes	INJ HYDROCORTISONE,TAB PREDNISOLONE,TAB LORATIDINE,TAB PARACETAMOL	ANTI SNAKE	SNAKE BITE	20ML	INTRAVENOUS	100MG,500MG,400MG	ANTI INFLAMATION
35	F	63	SEVERE VOMITTING,DIZZINESS,INCREASE IN BLOOD PRESSURE	Recovered fully	Yes	No	IV NORMAL SALINE(0.9%),INJ PROMETAZINE 25MG CHANGED DRUGS TO ZIDOVUDINE,LAMIVUDINE,NEVIRAPINE	EFAVIRENZ	HIV INFECTION	600MG	ORAL	300MG,960MG	O.I PROPHYLAXUS AND HIV
28	F	52	NUMBNESS AND FEELING HEAVY IN THE RIGHT LEG,BITTING AND PAINFUL SESATION IN THE BODY	Other	No	No	PIRITON TABLET,PYRIDEXINE TAB	ISONIAZIDE	PROPLAXUS AGAINST TB	300MG	ORAL	300MG,960MG	O.I PROPHYLAXUS AND HIV
33	M	60.5	PAINFUL RASH, DRY AND SCALLY SKIN OF THE UPPER LIMBS(HANDS), PRURITIS	Other	No	No	PIRITON TAB,CLOTRIMAZOLE,BETAMETHASONE,NEOMYCIN	EFAVIRENZ	HIV INFECTION	600MG	ORAL	300MG,960MG	O.I PROPHYLAXUS AND HIV
60	F	55	GENERALISED BODY RASHES RESULTING IN BLISTERS	Other	No	No	TAB LORATIDINE 10MG	EFAVIRENZ	HIV INFECTION	600MG	ORAL	300MG,960MG	HIV INFECTION
35	F	57	DARK PATCHES WITH SHINNING SURFACE ON THE UPPER LIMBS,CHEST AND BACK.	Other	No	No	PIRITON TAB,CLOTRIMAZOLE,NEOMYCIN	EFAVIRENZ	HIV INFECTION	600MG	ORAL	300MG	O.I PROPHYLAXUS AND HIV
39	F	48	GENERALISED BODY ITCHING WITHOUT RASHES OR BLISTER PATCHES	Other	No	No	TAB LORATIDINE 10MG	EFAVIRENZ	HIV INFECTION	600MG	ORAL	300MG,960MG	HIV INFECTION
56	F	57	DIZZINESS,GENERAL BODY WEAKNESS,JOINT PAIN	Recovered fully	No	No	GLUCOSE TABLET	ARTHEMETHER-LUMEFRATINE	MALARIA FEVER	480MG	ORAL	100MG,5MG	INSOMNIA
40	M	52	SEVERE GENERALISED ITCHING WITH DARK PATCHES,YELLOWISH COLORATION OF THE EYE,ELEVETED LEVER FUNCTION TEST	Other	No	No	CAP LIVOLYN,INJ HYDROCORTISONE,AMOXICILLIN	HERBAL MEDICINE	BODY ITCHING		ORAL	4MG	ITCHING
10	M	23	IRRATIONAL TALK AND BEHAVIOR,SUDDEN COLAPSE AND DIZZINESS	Recovered fully	Yes	No	IV FLUID,BED REST	AMOLODIPINE	PLASMODISM	400MG	ORAL	1G,635MG	ILLNESS
33	F	52	SEVERE ANAEMIA,FATIQUE	Other	Yes	No	BLOOD TRANSFUSION,ANRIBIOTICS	ZIDAVUDINE	HIV INFECTION	300MG	ORAL	150MG,200MG	HIV INFECTION
41	M	54	ABNORMAL SENSATION ON THE PALMS AND SKIN, RINGING SOUNDS IN THE EAR	Other	No	No	PRRIDOXINE,CARBORNIQUINE	STREPTOMYCIN	DEFAULT AFTER TB	1G	INTRAMUSCULAR	300MG,5MG	TB
50	M	60	RASHES ON THE THIGH,ARMS AND FACE	Recovered fully	No	No		NEVIRAPINE	HIV INFECTION	200MG	ORAL	300MG,960MG	HIV INFECTION
32	F	57	ULCERATING SKIN, RASHES ON THE TRUNK AND EXTREMITIES	Recovered fully	No	No		SULPHADOXINE-PYRIMETHAMINE	MALARIA	1575	ORAL	5MG,200MG	ANTIMALARIA
53	M	58	FACIAL SWELLING,ULCERATION OF THE LIPS AND BLEEDING FROM BUCAL MUCOSA	Recovered fully	Yes	No	ANTI HISTAMINE,STEROID,IVF,ANTIBIOTICS	COTRIMOXAZOLE	PROPLAXUS O.I	960MG	ORAL	150MG,300MG,200MG	HIV INFECTION
36			SEVERE BODY PAINS,DIZZINESS,SUDDEN COLAPSE	Recovered fully	No	No	ANALGESTIC,BED REST,STOPPAGE OF THE DRUG	LAMIVUDINE	HEPATITIS B INFECTION	300MG	ORAL	300MG	TREATMENT OF PULMONARY TB
28	M	45	JOINT AND MUSCLE PAINS,PERSISTENT DIARRHOEA	Other	Yes	No	ANALGESTIC,FLUID	RIFAMPICIN	RENAL TB	300MG	ORAL	45MG,400MG	RENAL TB
38	F		RASHES OF THE FACE,FEVER,BODY ITCHING	Recovered fully	No	No	TOPICAL ANTIBIOTICS,TAB AUGMENTRIN,IV FLUID,ANTIHISTAMIN	NEVIRAPINE	HIV INFECTION	200MG	ORAL	150MG,300MG	HIV
30	M	55	BODY RASHES,PRURITIS	Recovered fully	No	No	ANTIHYSTAMINE,ANTIBIOTICS	COTRIMOXAZOLE	COUGH/ICPC	960MG	ORAL	200MG,600MG	HIV INFECTION
51	M	58	LIPODYSTROPHY,FAT LOSS ON EXTREMITIES	Other	No	No	SWITCHED TO A NEW REGIMEN(TDF,3TC,EFV)	ZIDOVUDINE	HIV/AIDS	300MG	ORAL	150MG,200MG,960MG	HIV/AIDS
48	M	85	LETHARGY,PALLOR, ANAEMIA,HEPATOTOXICITY,ELEVATED LIVER TRANSAMINASEA	Other	No	No	SWITCHED TO NEW REGIMEN(TDF/3TC/EFV)MONITOR LIVER FUNCTION AND LIVER TRANSOMINASES	ZIDOVUDINE,NEVIRAPINE	HIV/AIDS	300MG,200MG	ORAL	150MG	HIV/AIDS
41	F	47	PALLOR,ELEVATED BLOOD PRESURE	Other	No	No	REFERRED FOR FURTHER WORK UP AT CARDIOLOGY UNIT	ZIDOVUDINE	HIV/AIDS	300MG	ORAL	150MG,200MG	HIV/AIDS
43	F	68	YELLOWNESS OF THE EYES,	Other	No	Yes	MONITOR LIVER TRANSMINOSES,PERFORM PENODIC LIVER FUNCTION TESTS,REASSURE THE PATIENT	ATAZANAVIR	HIV/AIDS	300MG	ORAL	1300MG,100MG	HIV/AIDS
55	M	95	SUNKEN LOOKING CHEEKS,LOSS OF FAT IN THE FACE	Other	No	No	SWITCHED TO ANOTHER REGIMEN(TDF/3TC/EFV)	ZIDOVUDINE	HIV/AIDS	300MG	ORAL	150MG	HIV/AIDS
39	F	102	WEAKNESS , FATIQUE, LOW HAEMOGLOBIN LEVEL	Recovered fully	No	No	SWITCHED TO NEW REGIMEN(TDF/3TC/EFV)	ZIDOVUDINE	HIV/AIDS	300MG	ORAL	150MG,960MG	O.I PROPHYLAXUS AND HIV
35	F	54	WIDESPREAD RASH,PRURITIS WITH SKIN EXFOLIATION,DEEP JAUNDICE IN THE EYES,MALAISE	Other	No	No	SWITCHED TO ANOTHER DRUG,LOPINAVIR,RITONAVIR GIVEN ANTIHISTAMIN TO MANAGE SYMPTOMS	ATAZANAVIR	HIV/AIDS	300MG	ORAL	100MG,300MG	HIV/AIDS
61	M	62	CHEEK WASTING OR SUNKENESS,FAT LOSS IN THE EXTREMITIES AND BUTTOCKS	Other	No	No	SWITCHED TO A NEW REGIMEN(TDF/3TC/EFV)	ZIDOVUDINE	HIV/AIDS	300MG	ORAL	150MG,200MG	HIV/AIDS
40	F	60	NIGHTMARES,EXTREME DIZZINESS,OCCATIONAL AGGRESIVENESS,PSYCHOTIC SYMPTOMS THAT HAVE PERSISTED SINCE ONSET OF THE DRUGS	Other	No	No	SWITCHED PATIENT TO ANOTHER REGIMEN(AZT/3TC/NVP)	EFAVIRENZ	HIV/AIDS	600MG	ORAL	300MG,500MG	HIV/AIDS
17	F	49	DIZZINESS,SLEEPLESSNESS,BODY WEAKNESS	Recovered fully	No	No		EFAVIRENZ	HIV/AIDS	600MG	ORAL	960MG	PROPHYLAXIS
17	M	41	NAUSEA,COLORED URINE(REDDISH),WEAKNESS AND COUGH	Recovered fully	No	No		RIFAMPICIN IN COMBINATION WITH ISONAMIDE	TREATMENT FOR TUBERCULOSIS	300MG	ORAL	600MG,300MG,50MG,150MG	HIV/AIDS,TB
28	F	68	DIZZINESS EVEN DURING THE DAY,LOSS OF APPETITE AND DROWSINESS	Recovered fully	No	No		EFAVIRENZ	HIV/AIDS	600MG	ORAL	960MG	O.Is PROPHYLAXIS
30	F	66	MILD ITCHING WITHOUT A RASH SLEEPLESSNESS ,RESTLESSNESS	Other	No	No		EFAVIRENZ	HIV/AIDS	600MG	ORAL	960MG,200MG	O.Is PROPHYLAXIS
30	F	66	ANAEMIA, LOW HEAMOGLOBIN	Recovered fully	No	No	SWITCHED TO A NEW REGIMEN(TDF/3TC/EFV)	ZIDOVUDINE	HIV/AIDS	300MG	ORAL	150MG,200MG	HIV/AIDS
4	F	14	RASHES, PRURITIS, DISCOMFORT,	Other	No	No	ANTIBIOTICS,CHLORPHENAMINE 4MG DAILY FOR 5 DAYS	EFAVIRENZ	HIV/AIDS	300MG	ORAL	120/60MG,240MG	O.I PROPHYLAXUS TB
53	M	73	DROWSINESS,DIZZINESS DURING THE DAY	Other	No	No		EFAVIRENZ	HIV/AIDS	600MG	ORAL
34	F	51	STIFFNESS OF HAND, LIMBS,PARENTHIA	Recovered fully	No	No			PROPHYLAXIS TB	300MG	ORAL	150MG,200MG,300MG	HIV/AIDS
32	F	43	GENERAL BODY WEAKNESS, DIZZINESS	Recovered fully	No	No		EFAVIRENZ	HIV TREATMENT	600MG	ORAL	300MG	HIV
37	F	63	SLEEPLESSNESS,PRURITIS ESPECIALLY IN THE NIGHT,HEADACHE	Recovered fully	No	No			ARV		ORAL	DAILY
25	M		DIZZINESS	Recovered fully	No	No		ISONAZID 300MG	IPT	DAILY	ORAL	300MG,200MG	HIV
	F		INSOMIA, BODY WEAKNESS	Recovered fully	No	No		EFAVIRENZ	HIV TREATMENT	DAILY	ORAL	300MG	HIV TREATMENT
35	F	55	PRURITIS,HOT FLUSHES, PYREXIA	Recovered fully	No	No		3TC/AZT/NVP	HIV TREATMENT	DAILY	ORAL
33	F	65	INSOMIA,DIARRHOEA,DIZZINESS	Recovered fully	No	No		EFAVIRENZ	HIV TREATMENT	DAILY	ORAL	300MG,400MG	HIV TREATMENT
39	F	71	SWEATING DAY AND NIGHT,ANOREXIA,VOMITTING,STOOLING	Recovered fully	No	No		LOPINAVOR	HIV	200MG,5MG	ORAL	300MG	HIV/AIDS
61	F	43	VAGINAL TENDERNESS,MIGRAINE,PAINFUL URINATING,UNSTEADY GAITS,VAGINAL DISCHARGE	Recovered fully	No	No			ARV	TWICE DAILY	ORAL	100MG,200MG
42	F	52	BAD DREAMS,SLEEPLESSNESS,LOSS OF APPETITE,LOSS OF BODY WEIGHT,GENERAL BODY WEAKNESS AND PYREXIA	Recovered fully	No	No		EFV/3TC/TDF	ARV	1 TABLETS DAILY	ORAL	1 TABLETS DAILY
45	F	115	BODY WEAKNESS AND PAIN	Recovered fully	No	No			PROPHYLAXIS TB	300MG	ORAL	150MG,200MG,300MG	HIV
30	M		BODY WEAKNESS,SORE ATTHE SCROTAL DUE TO ITCHING AND SCRATCHING	Recovered fully	No	No		ISONAZID 300MG	IPT	DAILY	ORAL	300MG,200MG
33	F	74	PATCHES ON THE SKIN WITH SKIN DISCOLORATION	Recovered fully	No	No		ISONAZID 300MG	IPT	300MG	ORAL	300MG,600MG	HIV
60	F	45	VOMITTING,DIZZINESS,COUGH	Death	No	No	TABS PLACIL 10MG	EFAVIRENZ	ARV	600MG	ORAL	960MG	HIV
55	M	45	DIZZINESS,DIARRHOEA,GENERALISED BODY WEAKNESS	Recovered fully	Yes	No	BLOOD TRANSFUSION,ANTIBIOTICS	ZIDOVUDINE	HIV	300MG	ORAL	300MG,600MG	HIV/AIDS
30	F	42	DIZZINESS,CONSTIPATION	Recovered fully	No	No		EFAVIRENZ	HIV	600MG	ORAL	300MG,960MG	HIV
30	F	31	JAUNDICE	Recovered fully	No	No		ISONAZID 300MG	HIV INFECTION	300MG	ORAL	300MG,600MG	HIV
31	F	51	TINNITUS,HEARING LOSS	Recovered fully	No	No	LORATIDINE TABLETS	EFAVIRENZ	HIV INFECTION	600MG	ORAL	300MG,960MG	HIV
56	F	47	GENERALISED BODY RASHES,ABDOMINAL PAIN	Recovered fully	No	No		LAMIVUDINE	HIV INFECTION	300MG	ORAL	300MG,960MG	HIV
40	M	54	SKIN RASHES	Recovered fully	No	No	TAB PREDISOLONE	LAMIVUDINE	HIV INFECTION	300MG	ORAL	300MG,960MG	HIV TREATMENT
45	M	55	DIZZINESS	Death	Yes	Yes	PLASIL	EFAVIRENZ	HIV	600MG	ORAL	5MG	HIV
13	F	31	TINNITITS	Recovered fully	No	No	TAB CHLOPHENIRAMINE		TB	150MG	ORAL	150MG,750MG	TB
11	M	41.5	REDISH URINATION,FEVER	Recovered fully	No	No		RIFAMPICIN	PB	600MG	ORAL	300MG,600MG	PULMONARY TB
38	M	72	SKIN DISCOLOURATION,ITCHING, PERSISTENT HEADAHE,DRY MOUTH,FEVER,INSOMNIA	Other	No	No		EFAVIRENZ	HIV INFECTION	600MG	ORAL	500MG,300MG	ARV
23	M	72	GYNAECOMASTIA,PAIN IN THE BREAST REGION	Other	No	No		ISONIAZIDE	TB INFECTION	300MG	ORAL	200MG	ANTI TB
42	M		RESTLESSNESS,INSOMNIA,NIGHTMARES,MIGRAINE,HEADACHE	Other	No	No	PARACETAMOL,CAFFEINE	AMODIAQUINE	MALARIA	600MG	ORAL	200MG,100MG	ANTIPYRETIC
29	F	74	CONSTIPATION,DIFFUCULTY PASSING STOOL	Recovered fully	No	No	INTAKE OF FRUIS WITH HIGH FIRBE CONTENT AND ANTACID	FERROUS SULPHATE	IRON DEFICIENCY ANAEMIA	200MG	ORAL	5MG	PREVENTION OF NEURAL DEFECT
33	F	71	ITCHIN,RASHES,BLISTERS WITH SKIN ERUPTIONS	Recovered fully	No	No	TAB LORATADINE	CIPROFLOXACIN	TYPHOID	500MG	ORAL	200MG	ANTIPYRETIC
44	F	54	NUMBNESS AND TINGLING OF THE FEET	Other	No	No		3TC/NVP/AZT	HIV INFECTION	1 BD	ORAL	960MG	O.I PROPHYLAXUS
43	F	62	SERIOUS ITCHING, INFLAMMATION OF THE SKIN,ERUPTION ALL OVER THE BODY	Recovered fully	No	No		AZT/3TC/NVP	ARV THERAPY	300/150/200 MG BD	ORAL	1G,400MG	27/08/2016
59	F	77	SKIN ERUPTION ALL OVER THE BODY, SERIOUS ITCHING,FEVER AND FAINTNESS	Recovered fully	No	No		TDF/3TC/EFV	ARV THERAPY	300MG	ORAL	960MG	O.I PROPHYLAXUS
60	M	70	SHARP PIN-LIKE SENSATION ON THE FEET,OCCASIONAL SWELLING OF FEET,EXCESSIVE YAWNING,OCCATIONAL JOINT PAIN AFTER WALKING SHORT DISTANCE	Other	No	No		TDF/EFV/3TC	ARV THERAPY	300MG	ORAL	960MG	O.I PROPHYLAXUS
48	M	71	LOSS OF FEELING IN THE LEG, TINGLING SENSATION IN THE FINGERS	Recovered fully	No	No		TDF/3TC/EFV	ARV THERAPY	300MG	ORAL	1 DAILY	BOOST PCV,INCREASE APPETITE
60	F	57	ITCHING ALL OVER THE BODY, SWELLING	Recovered fully	No	No		TDF/3TC/EFV	ARV THERAPY	1 DAILY	ORAL	960MG,500MG	O.I PROPHYLAXUS,BODY PAIN
53	F	53	SKIN ERUPTION ALL OVER THE BODY , INSOMNIA	Recovered fully	No	No		TDF/3TC/EFV	ARV THERAPY	300MG,200MG,150MG	ORAL	960MG,1G DAILY	O.I PROPHYLAXUS,OCCATIONAL HEADACHE,MALARIA FEVER
35	M	73	SKIN ERUPTION ALL OVER THE BODY, ITCHING	Recovered fully	No	No		TDF/3TC/EFV	ARV THERAPY	300MG/600MG	ORAL	960MG	O.I PROPHYLAXUS,MALARIA/THYPHOID
38	F	45	WHITISH PATCHES ON TONGUE, RECURRENT STOMACH GRUMBLING	Recovered fully	No	No		TDF/3TC/EFV	ARV THERAPY	1 AT NIGHT	ORAL	1 DAILY	O.I PROPHYLAXUS
51	F		ITCHING, RASHES ALL OVER THE BODY	Recovered fully	No	No	TAB XONADINE 120MG DAILY FOR 5 DAYS	TDF/3TC/EFV	ART	300MG,600MG	ORAL	960MG	O.I PROPHYLAXUS
32	F		GENERAL WEAKNESS OF THE BODY,UNABLE TO DO ANY DOMESTIC WORK,VOMITTING IN THE MORNING CONTINUOSLY	Recovered fully	No	No	ANTIEMETIC DRUG PRESCRIBED	TDF/3TC/EFV	ART	800MG,300MG	ORAL	300MG,480MG
36	F		BLEEDING FROM THE VAGINA	Recovered fully	No	No	DISCONTIINUATION OF COTRIMOXAZOLE	SULPHATRIM	PROPLAXUS O.I	960MG	ORAL	300MG	ART
13	F		SORES IN THE MOUTH,PRURITIS ON THE TWO LEGS	Recovered fully	No	No		3TC/AZT/EFV	HIV	150MG	ORAL	150MG,750MG,480MG	ANTI TB
55	F		ITCHING AND SKIN RASHES	Recovered fully	No	No	HYDROCORTISONE CREAM AND WHIFIELD OITMENT	3TC/AZT/NVP	HIV	300MG,200MG,300MG	ORAL	960MG	O.I PROPHYLAXUS
33	F		LOSS OF WEIGHT,GENERAL WEAKNESS OF THE BODY,JAUNDICE	Recovered fully	No	No	THE ARV DRUGS WAS DISCONTINUED	3TC/NVP/AZT	ART	300MG,200MG,150MG	ORAL	300MG,960MG
36	M	60	DREAMS,DIZZINESS, RESTLESSNESS	Recovered fully	No	No	DRUGS WERE CHANGED TO NEVIRAPINE	EFAVIRENZ	MANAGEMENT OF HIV	600MG	ORAL	960MG,300MG,300MG	HIV
21	F	54	LOSS OF APPETITE,INSOMNIA,NAUSEA,TIREDNESS	Recovered fully	No	No	AMODIQUINE WAS STOPPED CHANGED TO COARTEM	AMLODIPINE	MALARIA	2 TABLETS DAILY	ORAL
	F	57	PAPULAR RASHE,SKIN PIGMENTATION	Other	No	No	COTRIMAZOLE 960MG AND PREDISOLONE	TDF/3TC/EFV	HIV/AIDS	300MG,600MG	ORAL
4	F	14	HAEMATURIA	Recovered fully	No	No	ARTESUNATE WAS REPLACED WITH I.MARTHEMETER	ARTESUNATE	MALARIA	DAILY	ORAL
43	M	70	INSOMNIA,GENERAL BODY WEAKNESS	Other	No	No	COTRIMAZOLE 960MG AND PREDISOLONE	TENOFIVIR,LAMIVUDINE	HIV	300MG	ORAL	960MG,600MG	O.I PROPHYLAXUS AND HIV
32	F	54	VOMITTING FOR ABOUT 5-7 TIMES IN A DAY,RESTLESSNESS , TALKING IRRATIONALLY	Recovered fully	Yes	No	PROMETHAZINE INJECTION,I.V FLUID ANTIBIOTICS	ZIDOVUDINE	HIV	300MG	ORAL		WEAKNESS AND BODY PAIN
50	F	46	PARASTHESIS IN THE HANDS AND FEET	Other	No	No		ZIDOVUDINE,LAMIVUDINE,NEVIRAPINE	HIV	150MG,300MG,200MG	ORAL	960MG	O.I PROPHYLAXUS
46	F	57	PROFUSE SWEATING	Other	No	No		TENOFIVIR,LAMIVUDINE	ARV	300MG	ORAL	960MG	PCP
30	F	45	STOMACH PAIN, LOSS OF APPETITE	Other	No	No	TAB PARACETAMOL AND TAB M/VILA	TDF/3TC/EFV	ARV	300/300/600/DAILY	ORAL	300MG,300MG,600MG	ARV
45	F	59	DRYNESS OF MOUTH,SHIVERING, RESTLESSNESS	Recovered fully	No	No	SWITCHED TO TDF/3TC/LPV,VITAMIN C,TAB IBUPROFEN	AZT/3TC/NVP	ARV	300MG,200MG,150MG	ORAL	960MG,150MG,300MG	ARV,PCP
28	F	56	OTITIS MEDIA,SOUR TASTE,OCCASIONAL BLOCKAGE OF THE EARS	Other	No	No		KANAMYCIN	MDR TB	DAILY	IM	750MG	MDR TB
33	M	72	HALUCINATION,NIGHT MARES(BAD DREAMS),DIZZINESS	Recovered fully	No	No	STOP ARV	EFAVIRENZ	HAART	600MG	ORAL
30	F		HALUCINATION,NIGHT MARES(BAD DREAMS),DIZZINESS	Recovered fully	No	No	STOP ARV	EFAVIRENZ	HAART	600MG	ORAL
40	M		HALUCINATION,BAD DREAMS	Recovered fully	No	No		EFAVIRENZ	HAART	600MG	ORAL
32	M		REDNESS OF THE EYE,RUNNING EYES, ITCHING,SORE THROAT,MOUTH SORE,RUNNING NOSE	Recovered fully	Yes	No	IV INFUSION,FLUCONAZOLE,STREPSIDE	AZT/3TC/NVP	HIV/AIDS	1 BD	ORAL	1 DAILY	IMMIMUNIZATION
24	F	63	HYPERPIGMENTED,PAINFUL PATCHES	Recovered fully	No	No	COTRIMOXAZOLE	COTRIMOXAZOLE	PROPLAXUS O.I	960MG	ORAL	1 BD	RVD
35	F	54	INCOHERENT SPEECH	Recovered fully	No	No	STOP ARV,TAB TRIPHIZOL 250MG DAILY	EFAVIRENZ	RVD	1 NOCTE	ORAL	10 TABS	COUGH
37	F	44	SLEEP DISORDERS,RESTLESSNESS,HALLUCINATION		No	No	DRUG STOPPED AND CHANGED TO ANOTHER ONE	TDF/3TC/EFV	RVD	T NOCTE	ORALLY	960MG	O.IS PROPHYLAXIS
11	M		EXTRA PYRAMIDAL SIDE EFFECT	Recovered fully	No	No			ANTI MALARIA		ORAL	75	ANTI MALARIA
12	F		PHERIPERAL NEUROPATHY	Recovered with disability	No		DISCONTINUED	3TC/AZT/NVP	RVD	150/300/200	ORALLY
49	M		SEVERE HEADACHE,NIGHT MARE,HALLUCINATION		No	No	CHANGED TO COMBIPAK	EFV/3TC/TDF	RVD	600MG	ORALLY
67	M		HALLUCINATION	Recovered fully	No	No	DRUG CHANGED TO ABC/AZT/ATVR	ABC/AZT/ATVR	RVD		ORALLY
33	F	48	RASHES ALL OVER THE BACK AND HANDS,ITCHING	Recovered fully	No	No	TAB LORATIDINE 10MG DAILY,DRUG REGIMEN WAS CHANGED TO TDF/3TC/EFV		HIV INFECTION	1 TAB DAILY	ORAL	960MG	O.I PROPHYLAXUS
59	F	66	GENERALISED RASHES, ITCHING	Recovered fully	No	No	PREDISOLONE AND HER DRUG WAS CHANGED TO A RETINOVIR BASED REGIMEN		HIV INFECTION	600MG	ORAL	960MG DAILY	O.I PROPHYLAXUS
53	F	52	HEADACHE,DIZZINESS,NAUSEA,VOMITTING,RASHES ON THE FACE AND NECK	Recovered fully	No	No	DISCONTINUATION OF THE DRUG,CHANGED TO LORATIDINE		ANALGESTIC	DAILY	ORAL	2MG,300MG	ARV
44	F	65	ANAEMIA, WEAKNESS,CONJUCTIVITIS	Recovered fully	No	No	PATIENT WAS SWITCHED FROM ZIDOVUDINE BAESD REGIMEN TO TENOFOVIR BASED REGIMEN	ZIDOVUDINE,LAMIVUDINE,NEVIRAPINE	ANTIRETROVIRAL	1 TABLETS	ORAL	960MG	ANTI HYPERTENSIVE
57	F	53	PAIN IN THE FEET,PINS AND NEEDLE LIKE SENSATION IN THE FEET	Other	No	No	TAB PYRIDOXINE 50MG DAILY	ZIDOVUDINE	ANTIRETROVIRAL	300MG	ORAL	300MG DAILY	ARV
36	F	69.5	INCOHERENT SPEECH AND CONGESTION	Recovered fully	No	No	PATIENT WAS REASSURED AND TOLD THE REACTION	EFAVIRENZ,LAMIVUDINE,TENOFOVIR	ANTIRETROVIRAL	1 TABLET NOUTE	ORAL
52	F	54	LOSS OF MEMORY AND DIZZINESS	Recovered fully	No	No	DRUG REGIMEN WAS SWITCHED TO ANOTHER REGIMEN	EFAVIRENZ,LAMIVUDINE,TENOFOVIR	ANTIRETROVIRAL	1 TABLET	ORAL
33	M	68	RASHES ON THE GENITALS	Recovered fully	No	No	LORATIDINE 10MG DAILY		ANTIRETROVIRAL	1 TAB DAILY	ORAL	DAILY	RASHES ON GENITAL
68	F	90	PERIPHERAL NEUROPATHY ,PINS AND NEEDLE SENSATION,SHOCKING LIKE SENSATION	Other	No	No	PYRIDOXINE 50MG DAILY	ZIDOVUDINE,LAMIVUDINE,NEVIRAPINE	ANTIRETROVIRAL	1 TAB DAILY	ORAL	960MG	O.I PROPHYLAXUS
68	F	60	ITCHING, SWELLING, GENERALISED BODY WEAKNESS,INSOMNIA	Recovered fully	No	No	TAB LORATIDINE 10MG DAILY	EFV/TDF/3TC	HIV INFECTION	1 NOCTE	ORAL	125MG,1G	ANTIMALARIA
35	F		SEVERE HEADACHE,RASHES	Recovered fully	No	No	ANALGESTIC	ARTESUNATE	MALARIA	200MG	ORAL
32	M	82	FATIQUE	Other	No	No			MALARIA	1TAB BD	ORAL
			RASHES		No	No			MALARIA	150MG
25		52	SEVERE HEADACHE,SKIN RASHES	Other	No	No			MALARIA	3TAB	ORAL
55			RASHES ALL OVER THE BODY	Other	No	No			MALARIA	150MG	INTRAMUSCULAR	1TAB DAILY	ANAGESIC,APPETIZER
42	F	50	DIZZINESS,SOMNOLENSE	Other	No	No	COUNSELLED	EFAVIRENZ,LAMIVUDINE,TENOFOVIR	ANTIRETROVIRAL	DAILY	ORAL	DAILY	O.I PROPHYLAXUS
35	M	50	DIZZINESS	Recovered fully	No	No		EFAVIRENZ,LAMIVUDINE,TENOFOVIR	ANTIRETROVIRAL	DAILY	ORAL	DAILY	PROPHYLAXUS,MULTIVITAMIN
40	M	55	NIGHTMARES,DIZZINESS,CONFUSION	Recovered fully	No	No	COUNSELLED	EFAVIRENZ,LAMIVUDINE,TENOFOVIR	ANTIRETROVIRAL	DAILY	ORAL	DAILY	PROPHYLAXUS,MULTIVITAMIN
34	M	62	ANAEMIA,BODY WEAKNESS,LEG SWELLING,	Recovered fully	Yes	No	8 PINT OF BLOOD ADMINISTERD,TAB FERSOLATE GIVEN	AZT/3TC/NVP	ANTIRETROVIRAL	1 TAB DAILY	ORAL	960MG	O.I PROPHYLAXUS,SUPPLEMENT
32	F	52	PERSISTENT HEADACHE,HOTNESS OF THE BODY AT NIGHT	Other	No	No	GIVEN PARACETAMOL TAB AND WAS COUNSELLED	TDF/3TC/EFV	ANTIRETROVIRAL	DAILY	ORAL	960MG	O.I PROPHYLAXUS,SUPPLEMENT
26	F	71	TALKATIVENESS,VOMITTING,STRANGE BEHAVIOUR,DIZZINESS,HEADACHE,DISSORIENTATION	Recovered fully	Yes	No	DRUG WAS CHANGED	EFV/TDF/3TC	ANTIRETROVIRAL	DAILY	ORAL	DAILY	O.I PROPHYLAXUS
46	F	46	VERY SEVERE HEART BURN, VOMITTING,VERY BITTER SALIVA,ABDOMINAL UPSET PAIN	Recovered fully	No	No	ANTACID,U/SAKIT,BUSCOPAN	ACETY/SALICYLIC ACID	ANTIRETROVIRAL	75MG	ORAL	300MG,300MG,600MG	ARV
29	F		PAPULAR RASHES	Recovered fully	No	No		TDF/3TC/EFV	PMTCT	600MG	ORAL	300MG	PMTCT
52	F		SEVERE DIZZINESS	Recovered fully	No	No		ISONIAZIDE	PROPLAXUS TB	300MG	ORAL	600MG	ARV
44	M		SEVERE AND PERSISTENT DIZZINESS	Recovered fully	No	No		ISONIAZIDE	PROPLAXUS TB	300MG DAILY	ORAL	1 DAILY	ARV
42	M		MINOR RASHES ON HAND AND LEG	Other	No	No		EFV/3TC/ZDF	ARV	1 AT NIGHT	ORAL	960MG	O.I PROPHYLAXUS
26	F		INTERNAL HEAT,HEADACHE	Recovered fully	No	No		EFAVIRENZ,LAMIVUDINE,TENOFOVIR	ANTIRETROVIRAL	1 TAB DAILY	ORAL	1 DAILY	PROPHYLAXUS
29	M	36	OPTIC NEURITIS AND CORNEAL OPACITY	Other	No	No	OPHTHALMOLOGIST INVITED	PROTRONAMIDE 250MG	MDR-TB	500MG	ORAL	750MG.1.5MG,500MG	MDR TB
23	F	53	PAIN AT THE SITE OF THE INJECTION	Recovered fully	No	No	AMPLICLOX 500MG AND PARACETAMOL	KANAMYCIN	MDR TB	1G	INTRAMUSCULAR	750MG,2G	MDR TB
30	M	56	EPIGASTRIC PAIN	Recovered fully	No	No	OMEPRAZOLE,GESPID,METRONIDAZOLE AND AMOXYLLIN	LEVAFLOXACIN 250MG	MDR TB	750MG	ORAL	1G,75OMG	MDR TB
34	M	50	RINGING SOUND IN THE EARS	Recovered fully	No	No	CANDIBIOTIC EAR DROP,KANAMYCIN CHANGED TO CEPREOMYCIN	KANAMYCIN	MDR TB	750MG	ORAL	500MG,750MG	MDR TB
30	M	51	EPIGASTIC PAINS	Recovered fully	No	No	ANTACID TABLETS AND OMEPRAZOLE CAPS	LEVOFLOXACIN	MDR TB	750MG	ORAL	750MG,2G,450MG	MDR TB
59	M	57	EPIGASTIC PAINS	Recovered fully	No	No	OMEPRAZOLE CAPSULE	LEVOFLOXACIN	MDR TB	750MG	ORAL	750MG,2G	MDR TB
28	M	60	DEPRESSION WITH SUCIDAL IDEATION	Other	No	No	SERTRALINE TABLETS,DIAZEPAN TABLETS AND NORVITE FORTE TABLETS	CYCLOSERINE	MDR TB	750MG	ORAL	750MG.1.5MG	MDR TB
28	M	62	RINGING SOUND IN THE EAR	Recovered fully	No	No	KANAMYCIN CHANGED TO CAPROMYCIN	KANAMYCIN	MDR TB	1G DAILY	INTRAMUSCULAR	750MG	MDR TB
28	M	60	LIVER ENZYME ELEVATION	Other	No	No	ADMINISTRATION OF PYRAZINAMIDE SUSPENDED	PYRAZINAMIDE	MDR TB	2G DAILY	ORAL	750MG,1 G DAILY	MDR TB
50	F	46	ARTHRALGIA, GOUTY ARTHRITIS	Recovered fully	No	No	MELOSCAN AND ATLEPURINOL	PYRAZINAMIDE	MDR TB	1.5G	ORAL	750MG,500MH	MDR TB
43	M	54	RINGING SOUND IN THE EARS	Other	No	No	ENT SPECIALIST INVITED AND TAKING OF GOOD QUANTITY OF FLUID	CAPREOMYCIN	MDR TB	750MG	INTRAMUSCULAR	750MG	MDR TB
23	M	42	PALPITATION, PAINS AT THE BACK	Recovered fully	No	No	PROPRANOLOL AND IBUPROFEN TABLETS	LEVOFLOXACIN	MDR TB	750MG	ORAL	750MG,1 G,500MG DAILY	MDR TB
25	F	50	RINGING SOUND IN THE EARS	Recovered fully	No	No	HYDRATION OF FLUID	CAPREOMYCIN	MDR TB	1000MG DAILY	INTRAMUSCULAR	500MG,1.5G,750MG	MDR TB
30	M	56	GENERALIZED BODY WEAKNESS	Recovered fully	No	No	MULTIVITAMIN TABLETS AND FERROUS SULPHATE,FOLIC ACID TABLETS	LEVOFLOXACIN	MDR TB	750MG	ORAL	1G,2G,750MG	MDR TB
38	M	44	ITCHING OF THE EYES, POOR VISION	Recovered fully	No	No	CHLORAPHENICOL EYE DROPS AND PIRITON TABLETS	PROTRONAMIDE 250MG	MDR TB	500MG	ORAL	750MG,500MG	MDR TB
28	M	60	DEHYDRATION,ELECTROLYTE IMBALANCE, GENERALIZED BODY WEAKNESS	Recovered fully	No	No	5% DEXBOSE INWATER,FLUID AND MULTIVITAMIN CAPSULE	LEVOFLOXACIN 250MG	MDR TB	750MG	ORAL	750MG,1 G DAILY	MDR TB
45	M	45	PAINS AT THE JOINTS AND BACK	Recovered fully	No	No	PCM TABLETS AND IBRUPROFEN TABLETS	PYRAZINAMIDE	MDR TB	1.5G	ORAL	750MG,500MG	MDR TB
23	M	42	JOINT PAINS, GENERALIZED BODY WEAKNESS	Recovered fully	No	No	PCM TABLETS,DICLOFENAC TAB,EXPHADINE CAPSULE AND MULTIVITAMIN	PYRAZINAMIDE 500MG	MDR TB	1.5G	ORAL	500MG,750MG	MDR TB
36	M	75.5	RASHES ON THE SKIN,GENERALISED BODY WEAKNESS	Recovered fully	No	No	CALAME LOTION,GLUCOSE DRINK	EFV/3TC/TDF	HIV/AIDS	300MG	ORAL	960MG	PCP PROPHYLAXIS
39	F	45	GENERALISED BODY RASH,PRURITIS	Recovered fully	No	No	TAB PIRITON 8MG NOCTE,AMPICLOX 500MG,ABF CREAM TOPICALLY	EFV/3TC/TDF	HIV/AIDS	300MG	ORAL	8MG,960MG	PCP PROPHYLAXIS
36	F	46	PURITIS,GENERALISED BODY SPOTS	Recovered fully	No	No	DISCONTINUE COTRIMOXAZOLE,LORATIDINE 10MG,VITAMIN 200MG	COTRIMOXAZOLE	PCP PROPHYLAXIS	960MG	ORAL	500MG	UTI,IMPROVE APPETITE
34	F	50	DIZZINESS,GENERALISED BODY PAIN	Recovered fully	No	No	TAB LORATIDINE 10MG,CALAMINE LOTION	EFV/3TC/ZDF	HIV/AIDS	600MG,300MG	ORAL	480MG	PCP PROPHYLAXIS,IMMUNE BOOSTER
30	F		SEVERE HEADACHE, BLURRED VISION	Recovered fully	No	No	DISCONTINUE COTRIMOXAZOLE,TAB PCM	COTRIMOXAZOLE	PCP PROPHYLAXIS	960MG	ORAL	300MG	HIV/AIDS
30	M	63	CONJUCTIVITIS, SEVERE ITCHING	Recovered fully	No	No	PIRITON 8MG,DISCONTINUE COTRIMOXAZOLE	COTRIMOXAZOLE	PCP PROPHYLAXIS	960MG	ORAL	300MG	HIV/AIDS,IMMUNE BOOSTER
52	M	48	SEVERE PAIN IN THE BONE, NUMBNESS AND TINGLING SENSATION	Recovered fully	No	No	TAB NEUROVITE 1 DAILY,VASOPRIN 15MG DAILY	EFV/3TC/TDF	HIV INFECTION	300MG/600MG	ORAL	5MG,500MG	UTI,INAABILITY TO SLEEP
42	F	76	SEVERE ABDOMINAL PAIN	Recovered fully	No	No	DISCONTINUE COTRIMOXAZOLE	COTRIMOXAZOLE	PCP PROPHYLAXIS	960MG	ORAL	1 DAILY	IMMUNE BOOSTER
38	M	48	BODY WEAKNESS, STOOLING,LOSS OF APPETITE,YELLOWING OF EYE (JAUNDICE)	Other	No	No	TAB VITAMIN C 200MG,BCO TAB DAILY,GINSOMIN DAILY	EFV/3TC/TDF	HIV INFECTION	600MG,300MG	ORAL	600MG,1200MG	PTB
60	F	76	EXPOLIATIVE DERMATITIS OF THE SKIN OF THE PALMS AND SOLE OF THE FEET	Recovered fully	No	No	DISCONTINUED AMPICLOX TAB,LORATIDINE 10MG	AMPICLOX	UTI	100MG	ORAL	300MG,480MG	HIV/AIDS,UTI
3	M	10	MASCULO PAPULAR RASHES, PRURITIS	Recovered fully	No	No	SUSPECTED CEFUROXINE 259MG,PIRITON	ZIDOVUDINE,LAMIVUDINE,NEVIRAPINE	HIV INFECTION	300MG	ORAL	240MG,100MG,125MG	PCP PROPHYLAXIS,MALARIA,URI
41	M	68.5	PURITIS,RASHES	Other	No	No	TAB LORATIDINE 10MG,CALAMINE LOTION	ZIDOVUDINE,LAMIVUDINE,NEVIRAPINE	HIV/AIDS	150MG	ORAL	960MG	PCP PROPHYLAXIS
11	F	28.5	GENERALIZED PRURITIS,VASCULO PAPULAR RASHES	Recovered fully	No	No	DISCONTINUED NEVIRAPINE,SUBSTITUTE WITH EFAVIRENZ,PIRITON	3TC/NVP/ZDV	HIV INFECTION	750MG	ORAL	480MG	PCP PROPHYLAXIS
44	M		STOOLING, ABDOMINAL PAIN AND DIZZINESS	Recovered fully	No	No	ORS PRN,LOPERAMIDE 4MG START THEN 2MG PRN,MULTIVITE	LOPANOIR,RETONOIR	HIV INFECTION	400MG	ORAL	200MG,960MG	PCP PROPHYLAXIS
39	F	67	NAUSEA , VOMITTING,CHEST PAIN	Recovered fully	No	No	TAB AVOMINE,ORS PRN,PCM	LOPINAVIR,RITONAVIR	HIV/AIDS	400MG,100MG	ORAL	200MG,500MG	HEAMATINICTS
10	M	18	VOMITTING,FATIGUE,STOOLING	Life Threatening	Yes	No	ORS,ZN,ANTI MALARIA,BCO	LOPINAVIR,RITONAVIR	HIV/AIDS	200MG	ORAL	150MG,PRN,200MG	HIV/AIDS,REHYDRATION SUPPLEMENT
34	F	44	DIZZINES,HEADACHE,STOOLING,ITCHING	Recovered fully	No	No	AVOID FATTY MEALS(DINNER),PCM,LORATIDINE	TDF/3TC/EFV	HIV/AIDS	300MG,600MG	ORAL	1G	PCP PROPHYLAXIS,ITCHING
30	F		ITCHING,DIZZINESS	Recovered fully	No	No	LORATIDINE 10MG,AVOID FATTY FOOD	TDF/3TC/EFV	HIV/AIDS	300MG,600MG	ORAL	150MG,100MG,500MG	STI
57	M	68	GENERALISED BODY WEAKNESS,VIVID DREAMS	Recovered fully	No	No	AVOID FATTY MEALS(DINNER),TAB MULTIVITAMIN	TDF/3TC/EFV	HIV/AIDS	300MG	ORAL	150MG	ANALGETIC,IMMUNE BOOSTER
55	F	59	PERIPHERAL NEUROPATHY, RIGHT LEG PARALYSIS	Other	No	No	TRYPTIZOLE NOCTE,NEURO VITE FORTE,ARTHROTIC	EFV/3TC/TDF	HIV/AIDS	600MG	ORAL	25MG,150MG	NEUROPATHY
46	F	61	PERIPHERAL NEUROPATHY	Other	No	No	TAB IBUPROFEN 400MG,NEURO VITAMIN	ZIDOVUDINE,LAMIVUDINE	HIV/AIDS	150MG	ORAL	960MG	PCP PROPHYLAXIS
36	F	49	RASHES,JAUNDICE,BLISTERS ON THE LIPS	Other	No	No	SUBSTITION OF ABC 3TC,EFV WITH TDF,3TC,EFV	ABACAVOIR/LAMIVUDINE	ART	600MG,300MG	ORAL	600MG
10	M	16	VOMITTING,FATIQUE,STOOLING	Death	No	No	ORS	LOPINAVIR,RITONAVIR	HIV/AIDS	600MG	ORAL	150MG,200MG	HIV/AIDS
41	F	53	GENERALISED BODY RASHES	Other	No	No	ABF CREAM,PIRITON 8MG NOCTE	COTRIMOXAZOLE	PCP PROPHYLAXIS	960MG	ORAL	150MG,100MG,200MG	HIV/AIDS,PSYCHOSIS
36	M	75	RASHES, GENERALISED BODY WEAKNESS	Other	No	No	CALAMINE LOTION,GLUCOSE DRINK	EFV/3TC/TDF	HIV/AIDS	300MG,600MG	ORAL	960MG	PCP PROPHYLAXIS
42	F	76	SEVERE ABDOMINAL PAIN	Recovered fully	No	No	DISCONTINUED COTRIMOXAZOLE	COTRIMOXAZOLE	PCP PROPHYLAXIS	960MG	ORAL	DAILY	IMMUNE BOOSTER
30	M	53	VOMITTING	Recovered fully	No	No	IM PLASIL	PROTHIONAMIDE TAB	MDR-TB	750MG	ORAL	1G,750MG,750MG	MDR TB
35	M	48	GASTRITIS	Recovered fully	No	No	SUSPENSION GESTID	PROTHRORAMIDE	MDR TB	500MG	ORAL	500MG,100MG	MDR TB
32	M	62	DIARRHOEA	Recovered fully	No	No	LOPERAMIDE TAB	PROTHRORAMIDE	MDR TB	750MG	ORAL	150MG,750MG	MDR TB
51	M	51	GASTRITIS	Recovered fully	No	No	SUSPENSION GESTID	PROTHRORAMIDE	MDR TB	750MG	ORAL	1G,750MG	MDR TB
58	M	48	ARTHRALGIA, ARTHRITIS	Recovered fully	No		DOLOMETA B TAB	KANAMYCIN	MDR TB	500MG	IM	500MG,750MG	MDR TB
30	M	55	ARTHRALGIA, ARTHRITIS	Recovered fully	No	No	TABS BRUFEN	KANAMYCIN	MDR TB	750MG	IM	500MG,750MG	MDR TB
37	F	40	ALLERGIC REACTION,ITCHING	Recovered fully	No	No	TAB LORATIDINE	PROTHRORAMIDE	MDR TB	500MG	ORAL	500MG,600MG	MDR TB
54	M	47	ARTHRALGIA, ARTHRITIS	Recovered fully	No	No	CAP TRAMADOL	KANAMYCIN	MDR TB	500MG	IM	500MG	MDR TB
14	F		FEVER,SHIVERING, SWEATING	Life Threatening	No	No	INJ HYDROCORTISONE,IM PROMETHAZINE	SNAKE VENOM ANTISERUM	SNAKE BITE	5-10ML	IV
25	F		FREQUENT STOOLING,DIARRHOEA,BODY WEAKNESS	Other	No	No	ORS	IRON,FOLIC ACID	ANTE NATAL ROUTINE DRUGS		PO	300MG	ANTIMALARIA
30	F		RASHES, BURNING SENSATION AT THE TIP OF THE PENILE REGION	Other	No	No	CHLORPHENIRAMINE TABLET CHANGED TO ARTHEMETER/LUMEFRATRINE	SULFADOXINE/PYRIME	MALARIA	3 AT ONCE	PO	1G,100MG	ANTIMALARIA
11	F		CONJUCTIVITIS,HAEMORRHAGE CAUSING BLEEDING ON THE LIPS OF THE MOUTH	Other	No	No	REGIMEN CHANGED TO TDF/3TC/EFV	NEVIRAPINE	HIV/AIDS	300MG,200MG	PO	480MG	O.I PROPHYLAXUS
1			SEVERE RASH, FEVER	Recovered fully	No	No	CHLORPHENIRAMINE TABLET	HERBAL	ANALGESTIC	2.5ML	PO
50	F		ABDOMINAL CRAMPS,DIARRHOEA	Recovered fully	No	No	CAP LOPERAMIDE,ORS	ARTEMETHER 80MG	MALARIA	T.B.D	PO	T.B.D	ENTERIC FEVER
68	M	75	CONFUSION,TENDERNESS, MADNESS, LOSS OF BALANCE	Recovered fully	No	No		TEN/LAM/EFV	PROPHYLAXIS	600MG	ORAL	960MG	O.I PROPHYLAXUS
35	F	58	SEVERE ITCHING	Other	No	No	PIRITON TAB	LAMVUDINE	ART	T.B.D	ORAL	960MG	O.I PROPHYLAXUS
35	M		SEVERE STOOLING	Other	No	No	TAB IMODIVINE,FLAGYL	EFV/LAM/TEN	ART	T.B.D	ORAL	960MG	O.I PROPHYLAXUS
33	F	35	AMENORRHOEA	Other	No	No		SEPTRIN	PROPHYLAXIS	960MG	ORAL	DAILY	IMMUNE BOOSTER
43	F	80	BODY ITCHING, RASHES,COUGH	Other	No	No		SEPTRIN	PROPHYLAXIS	960MG	ORAL	1 CAP DAILY	IMMUNE BOOSTER
56	F	51	PRUITIS(SEVERE), RASHES	Other	No	No		LAM/NEV/ZID	ART	T.B.D	ORAL	960MG	O.I PROPHYLAXUS
34	F		SLEEPLESSNESS,LACK OF APPETITE	Other	No	No		TDF/3TC/EFV	ART	T.B.D	ORAL	960MG	O.I PROPHYLAXUS
48	F		RASHES	Other	No	No		TEN/LAM/EFV	ART	T.B.D	ORAL	960MG	O.I PROPHYLAXUS
25	F	44	ITCHING,RASHES	Other	No	No		SEPTRIN	PROPHYLAXIS	960MG	ORAL	1 CAP DAILY	IMMUNE BOOSTER
53	F		NAIL DISCOLORATION	Other	No	No		LAM/NEV/ZID	ART	T.B.D	ORAL	960MG	O.I PROPHYLAXUS
39	F	55	NAIL DISCOLORATION,NUMBNESS OF THE HANDS AND FEET	Other	No	No	VITAMIN BCO	TEN/LAM/EFV	ART	T.B.D	ORAL	960MG	O.I PROPHYLAXUS
37	F	70	STOOLING,ABDOMINAL PIAN	Other	No	No	LOPERAMIDE CAP,TAB OFLEXACIN AND TINIDAZOLE,ORS	TDF/3TC/EFV	ART	1 BD	ORAL	960MG	O.I PROPHYLAXUS
27	F	89	SKIN RASHES,PRURITUS	Other	No	No	TAB CIPROFLOXACIN,TAB PREDISOLONE	COTRIMOXAZOLE	PROPLAXUS O.I	960MG	ORAL	1 B.D	ART
40	F	97	DIZZINESS,SKIN RASHES,ITCHING, HALLUCINATION	Other	No	No	CIPROFLOXACIN TAB,LORATIDINE TAB,PIRITON	TDF/3TC/EFV	ART	1 TABLET	ORAL	960MG	O.I PROPHYLAXUS
46	M	65	INSOMIA,GENERAL BODY WEAKNESS	Other	No	No	TAB AMITUPTYLINE 25MG NOCTE,TAB IBUPROFEN 400MG,MULTIVITAMIN	TDF/3TC/EFV	ART	T.B.D	ORAL	960MG	PROPHYLAXUS
40	F	104	DIZZINESS,WEAKNESS	Other	No	No	ASTFER TONIC,TAB DIAZEPAM,TAB METOCLOFEDAMINE	TDF/3TC/EFV	ART	1 BD	ORAL	960MG	O.I PROPHYLAXUS
51	F	50	BURNING SENSATION AT THE TOES AND FINGERS	Other	No	No	TABS PYRIDEXINE,TAB BCO,CAP ASTYMIN	COTRIMOXAZOLE	PROPLAXUS O.I	960MG	ORAL
55	M	75	NUMBNESS ON HANDS AND FEET	Other	No	No	VITAMIN BCO	LOPINAVIR,RITONAVIR	ARV	T.B.D	ORAL	960MG,300MG	ART,O.I
52	F	92	NUMBERNESS ON THE HANDS	Other	No	No		LAM/NEV/ZID	ART	T.B.D	ORAL	960MG	PROPHYLAXUS
32	F	43	VOMITING, GENERAL WEAKNESS OF THE BODY	Recovered fully	No	No	REASSURANCE	TEN/LAM/EFV	ART	T.B.D	ORAL	960MG	O.I PROPHYLAXUS
10	M	25	SEVERE LOSS OF WEIGHT	Other	No	No		LAM/NEV/ZID	ART	T.B.D	ORAL	960MG	PROPHYLAXUS
45	F	69	BURNING SENSATION, AMENORRHEA,CONSTANT HEADACHE	Other	No	No	PARACETAMOL 500MG,VITAMIN BCO TAB		ART	1 BD	ORAL	960MG	PROPHYLAXUS
56	F	68	HYPOTHYRODISM,ODEMA(PEDAL)	Other	No	No	PATIENT ADVICED TO DO T4 TESTS		ART	1 BD	ORAL	960MG	O.I PROPHYLAXUS
40	M	52	INSOMIA	Other	No	No		LAM/NEV/ZID	ART	1 BD	ORAL	960MG	PROPHYLAXUS
39	F	48	DIARRHOEA	Other	No	No	TIMIDAZOLE TAB,TAB EFETHIN,CAP LOPERAMIDE,TAB ZINC		ART	1 BD	ORAL	T.B.D	SUPPLEMENT
54	M	60	NAUSEA,VOMITTING	Other	No	No	TAB DOLOMETAB,PRAMIDE,TAB ZINC		ART	T.B.D	ORAL	960MG	O.I PROPHYLAXUS
53	F	75	PERIPHERAL NEUROPATHY,DIARRHOEA,MYALGIA	Other	No	No	OFLOXACIN 200MG,TAB TINIDAZOLE,CAP LOPERAMIDE,TAB BCO,TAB ZINC		ART	T.B.D	ORAL	T.B.D	O.I PROPHYLAXUS
40	F	65	SKIN RASHES	Other	No	No	TAB PIRITON VOCTE,TAB PREDISOLONE,CALAMINE LOTION		ART	T.B.D	ORAL	1 TAB DAILY	O.I PROPHYLAXUS
33	F	60	NUMBNESS AT EXTREMITIES TREMOR ON THE LEGS	Other	No	No	TAB BCO,PREDISOLONE 500MG DAILY,DIAZEPAM 50MG DAILY		ART	1 TAB DAILY	ORAL	1 DAILY	O.I PROPHYLAXUS
52	F	45	NUMBERNES AT THE LEFT LEG	Other	No	No	TAB PREDISOLONE 500MG,VITAMIN BCO TAB		ART	1 TAB DAILY	ORAL	DAILY	O.I PROPHYLAXUS
47	F	75	LACK OF MENSTRUATION	Other	No	No	REASSURANCE,HEAMATINS		ART	1 TAB DAILY	ORAL	1 DAILY	O.I PROPHYLAXUS
32	F	58	GENERAL WEAKNESS,WEIGHT LOSS	Other	No	No	TAB VIT BCO,MULTIVITE,DIET ADVICED		ART	1 TAB DAILY	ORAL	1 DAILY	O.I PROPHYLAXUS
32	F	51	LEG AND JOINT PAIN	Other	No	No		LAM/NEV/ZID	ART	DAILY	ORAL	960MG	O.I PROPHYLAXUS
35	F	65	NUMBNESS OF THE LEGS	Other	No	No		SEPTRIN	PROPLAXUS O.I	960MG	ORAL	1 CAP DAILY	IMMUNE BOOSTER
30	F	73	AMENORRHEA,OLIGOMENORRHEA	Other	No	No	REFERRED TO GYNECOLOGY	LAM/NEV/ZID	ART	1 BD	ORAL	960MG	ARV
36	F	70	BREAST PAIN, GYNECOMASIA	Other	No	No		TEN/LAM/EFV	ART	T.B.D	ORAL	960MG	O.I PROPHYLAXUS
40	F	55	NUMBNESS ON HANDS AND FEET	Other	No	No		LAM/NEV/ZID	ART	T.B.D	ORAL	1 BD,960MG	O.I PROPHYLAXUS
60	F	58	SEVERE PRURITIS	Recovered fully	No	No	TAB PIRITON,CALAMINE LOTION	STIMUNO FORTE	IMMUNE BOOSTER	T.B.D	ORAL	1 CAP	IMMUNE BOOSTER
59	F	80	SEVERE DULLNESS	Other	No	No		LAM/NEV/ZID	ARV	960MG	ORAL	960MG	O.I PROPHYLAXUS
38	F	70	NUMBNESS IN BOTH HANDS AND FEET	Other	No	No	VIT BCO	TEN/LAM/EFV	ART	T.B.D	ORAL	960MG	O.I PROPHYLAXUS
43	F	67	RASHES	Other	No	No		EFV/LAM/TDF	ART	600MG	ORAL	DAILY	IMMUNE BOOSTER
38	F	75	BURNING SENSATION IN THE BONES,RASHES,PARASTHESIA IN THE HANDS	Other	No	No	VIT BCO,CALAMINE LOTION	TEN/LAM/EFV	ART	T.B.D	ORAL	960MG	O.I PROPHYLAXUS
50	F	90	COLLAPSED WITH GRUNTING RESPIRATION,ANAPHYLACTIC SHOCK	Life Threatening	No	No	HYDROCORTISONE,ADRALINE,HYDRATION	ACETAZOLATIDE	OPTICAL USE		ORAL	100MG	ANALGESIC
34	F	52	SEVERE HEADACHE, SLEEPLESNESS,LOSS OF APPETITE	Other	No			TDF/3TC/EFV	ART	1 OD	ORALLY	960MG	O.I
33	F	33	AMENORHOEA	Other		No		SEPTRIN	PROHYLAXIS	960MG	ORALLY	1CAP OD	IMMUNE BOOSTERS
43	F	80	BODY ITCHING, RASHES ,COUGH			No		SEPTRIN	PROPHYLAXIS	960MG	ORALLY	1 CAP OD	IMMUNE BOOSTERS
30	F	45	HEADACHE,PAIN, INCOHERENT SPEECH, INACTIVITY OF THE INJECTION	Recovered fully			ANOTHER BRAND OF DIAZEPAM WAS ADMINSTERED	DIAZEPAM	INSOMIA	10MG	IV	10MG,500MG	HYPERTENSION,FLUID REPLACEMENT
16	F	38	INSOMNIA	Recovered fully	Yes	No	IM CHLORPHENIRAMINE 50MG	DIAZEPAM	SLEEPLESSNESS	10MG	ORAL,IV	500MG,1G	TYPHIOD,PAIN RELIEF
29	F	65	HEADACHE	Recovered fully	No	No	GIVING TAB PARACETAMOL,PRN AND COUNSELLED	TDF/3TC/EFV	HIV INFECTION	300MG,600MG	ORAL	960MG	O.I PROPHYLAXUS
52	F	115	HEADACHE	Other	No	No	GIVING TAB PARACETAMOL,PRN AND COUNSELLED	TDF/3TC/EFV	HIV INFECTION	300MG,600MG	ORAL	960MG	O.I PROPHYLAXUS
28		50	GENERAL BODY WEAKNESS	Recovered fully	No	No	SWITCHED TO P-ALAXIN TABLET	ARTEMETHE/LUMEFANTRINE	MALARIA		ORAL	IDAILY,500MG BD	HEAMATINICS PAIN RELIEF
58	F		EXCESSIVE SEDATION,INSOMELINESS	Recovered fully	No	No		EFV/3TC/TDF	HIV	1 DAILY	ORAL	960MG	O.I PROPHYLAXUS
32	F		PROFUSE SWEATING, VOMITING,CHEST TIGHTENING,RESTLESSNESS	Death	No	Yes	SYMPTOMTIC TREATMENT	HYOSCINE	ABDOMINAL PAIN	200MG DAILY	INTRAMUSCULAR	600MG	PYREXIA
51	F		SERIOUS PALPITATION, BLURRED VISION,PSYCHOTIC TENDENCY,SERIOUS HEADACHE,LACK OF STREGTH, TOTAL BODY SHRIKING	Recovered fully	No	No		EFV/3TC/TDF	HIV	1 DAILY	ORAL	960MG	O.I PROPHYLAXUS
38	M		GENERAL BODY WEAKNESS, LOSS OF APPETITE	Recovered fully	No	No		EFV/3TC/TDF	HIV	1 TAB DAILY	ORAL	960MG	INFECTIOUS
61	M		FREQUENT DRY COUGH	Recovered fully	No	No		LISINOPRIL	HYPERTENSION	10MG	ORAL	1G/50MG	ANTIMALARIA
26	M	57	PERIPHERAL NEUROPATHY	Other	No	No	NEUROVITE FORTE	CYCLOSERINE	MDR TB	1G,250MG,500MG	ORAL	1G,250MG	MDR TB
39	M	60	NAUSEA,VOMITTING	Recovered fully	No	No	TAB METOCLOPRAMIDE,10MG	PROTHIONAMIDE TAB	MDR TB	250MG	ORAL	1G,25OMG,500MG	MDR TB
18	F	29	PERIPHERAL NEUROPATHY	Other	No	No	TAB NEUROVITE FORTE	TAB CYCLOSERINE	MDR TB	25MG	ORAL	1G,250MG,500MG	MDR TB
52	M	51	PERIPHERAL NEUROPATHY	Other	No	No	TAB NEUROVITE FORTE	TAB CYCLOSERINE	MDR TB	250MG	ORAL	1G,250MG,500MG	MDR TB
33	M	40	PSYCHOSIS	Other	No	No	TAB HALOPERIDOL,BENZHEVOL	CYCLOSERINE	MDR TB	250MG	ORAL	1G,250MG,500MG	MDR TB
35	M	50	PERIPHERAL NEUROPATHY	Other	No	No	TAB NEUROVITE FORTE	TAB CYCLOSERINE	MDR TB	250MG	ORAL	1G,250MG,500MG	MDR TB
43	M		WORSENING LOSS OF HEARING	Other	No	No	TAB NEUROVITE FORTE	CYCLOSERINE	MDR TB	250MG	ORAL	1G,250MG,500MG	MDR TB
31	M	62	NAUSEA,VOMITTING	Other	No	No	TAB METHOCLOPRAMIDE,10MG	PROTHRORAMIDE	MDR TB	250MG	ORAL	1G,250MG,500MG	MDR TB
56	M	49	DEPRESION	Recovered fully	No	No	TAB AMITRYPTYLINE	TAB CYCLOSERINE	MDR TB	250MG	ORAL	1G,250MG,500MG	MDR TB
37	M	53	PERIPHERAL NEUROPATHY	Other	No	No	TAB NEUROVITE FORTE	TAB CYCLOSERINE	MDR TB	250MG	ORAL	1G,250MG,500MG	MDR TB
37	F	43	NAUSEA,VOMITTING	Other	No	No	TAB METOCLOPRAMIDE,10MG	PROTHRORAMIDE				1G,250MG,500MG	MDR TB
37	M	53	PSYCHOSIS	Other	No	No	TAB HALOPERIDOL,BENZHEVOL	TAB CYCLOSERINE	MDR TB	250MG	ORAL	1G,250MG,500MG	MDR TB
47	F	43	NAUSEA,VOMITTING	Other	No	No	TAB METHOCLOPRAMIDE,10MG	PROTHIONAMIDE TAB	MDR TB	250MG	ORAL	1G,250MG,500MG	MDR TB
47	F	43	PERIPHERAL NEUROPATHY	Other	No	No	TAB NEUROVITE FORTE	TAB CYCLOSERINE	MDR TB	250MG	ORAL	1G,250MG,500MG	MDR TB
39	M	48	NAUSEA,VOMITTING	Recovered fully	No	No	TAB METOCLOPRAMIDE,10MG	PROTHRORAMIDE	MDR TB	250MG	ORAL	1G,250MG,500MG	MDR TB
39	M	48	GASTRITIS	Other	No	No	TAB GELUSIL	LEVOFLOXACIN	MDR TB	250MG	ORAL	1G,250MG,500MG	MDR TB
39	M	48	DEPRESSION	Other	No	No	TAB AMITRYPTYLINE	TAB CYCLOSERINE	MDR TB	250MG	ORAL	1G,250MG,500MG	MDR TB
39	M	43	PSYCHOSIS	Other	No	No	TAB HALOPERIDOL,BENZHEVOL	TAB CYCLOSERINE	MDR TB	250MG	ORAL	1G,250MG,500MG	MDR TB
34	M	54	PERIPHERAL NEUROPATHY	Other	No	No	TAB NEUROVITE FORTE	TAB CYCLOSERINE	MDR TB	250MG	ORAL	1G,250MG,500MG	MDR TB
34	M	54	PSYCHOSIS	Other	No	No	TAB HALOPERIDOL,BENZHEVOL	TAB CYCLOSERINE	MDR TB	250MG	ORAL	1G,250MG,500MG	MDR TB
60	F	62	PSYCHOSIS	Recovered fully				CYCLOSERINE	MDR TB	250MG	ORAL	1G,250MG,250MG,500MG	MDR TB
60	F	62	DEPRESSION	Recovered fully	No	No	TAB AMITRYPTILLINE	TAB CYCLOSERINE	MDRTB	250MG	ORAL	1G,250MG,250MG,500MG	MDRTB
25	F	53	NAUSEA AND VOMITING	Recovered fully	No	No	TAB METOCLOPRAMIDE 10MG	TAB PROTHIONAMIDE	MDRTB	250MG	ORAL	1G,250MG, 250MG, 500MG	MDRTB
60	F	62	PERIPHEAL NEUROPATHY	Recovered fully	No	No	TAB NEROVITE FORTE	TABS CYCLOSERINE	MDRTB	250MG	ORAL	1G 250MG	MDRTB
25	M	59	PSYCHOSIS	Recovered fully	No	No	TABS HALOPERITOL AND BENZHEXOL	TAB CYCLOSERINE	MDRTB	250MG	ORAL	1G 250MG	MDRTB
33	M	65	ARTHRALGIA	Recovered fully	No	No	TAB TRAMADOL 100MG	PYRAZINAMIDE	MDRTB	500MG	ORAL	1G 250MG	MDRTB
28	M	52	ARTHRAGIA	Recovered fully			TAB IBUROFEN	PYRAZINAMIDE	MDRTB	500MG	ORAL	1G, 250MG	MDRTB
28	M	52	PHERIPHERAL NEUROPATHY	Recovered fully	No	No	TAB NEUROBION	TAB CYCLOSERINE	MDRTB	250MG	ORAL	1G 250MG	MDRTB
28	M	52	DEPRESSION	Recovered fully	No	No	TAB TRYPTIZOL	CYCLOSERINE	MDRTB	250MG	ORAL	1G 250MG	MDRTB
26	M	58	PSYCHOSIS	Other	No	No	TAB HALOPERIDOL AND BENZHEXOL	TAB CYCLOSERINE	MDRTB	250MG	ORAL	1G 250MG,250MG,500MG	MDRTB
26	M	58	NAUSEA AND VOMITING	Other	No	No	TAB METOCLOPRAMIDE 10MG	TAB PROTHIONAMIDE	MDRTB	250MG	ORAL	1G 250MG , 250MG,500MG	MDRTB
31	M	62	ARTHALGIA	Recovered fully		No	TAB DICLOFENAC	PYRAZINAMIDE	MDRTB	500MG	ORAL	1G 250MG	MDRTB
40	M	55	NAUSEA, BODY WEAKNESS, JOINT PAIN, TINGLING SENSATION ON THE RIGHT HAND	Other	No	No	INCREASE TAB PYRIDOXINE 50MG FROM 150MG TO 200MG	PYRAZINANIDE	TREATMENT OF MDR-TB	1750MG	ORAL		MDR-TB THERAPY
40	M	55	INSOMNIA, BODY WEAKNESS, NAUSEA	Other	No	No	TAB LEXOTAN 1.5MG	LEVOFLOXACIN	TREATMENT OF MDR-TB	750MG	ORAL		MDR-TB THERAPY
39	M	59	RASHES ON ARMS, ABDOMEN AND LEGS, DRY SKIN AND EXFOLIATION	Other	No	No	CAP FLUCONAZOLE 200MG O.D/ TAB LORATADINE 10MG O.D	LOPINAVIR/ RITONAVIR	ANTIRETROVIRAL THERAPY	TWO TABLETS 12 HRLY	ORAL		ART
36	M	56	GENERALIZED BODY ITCHING, GENERALISED BODY PAIN, INSOMNIA	Recovered fully	No	No	TAB LEXOTAN 1.5MG, TAB PIRITON 4MG	LEVOFLOXACIN	TREATMENT OF MDR-TB	750MG	ORAL		MDR-TB THERAPY
39	F	40	JOINT PAIN, BODY PAIN	Recovered fully	No	No	TAB DICLOFENAC, TAB PROMETHAZINE	TAB PYRAZIMIDE	TREATMENT OF MDR-TB	1200MG	ORAL	500MG	MDR-TB THERAPY
43	M	64	KNEE PAIN, JOINT PAIN, LOSS OF APPETITE, BODY WEAKNESS, HEADACHE, DIFFICULTY HEARING, RINGING EAR SOUNDS	Other	No	No	TAB DICLOFENAC 50MG B.D, TAB ACT, ALTERNATE DAYS FOR ADMINISTRATION, KANAMYCIN INJ	PYRAZINANIDE	TREATMENT OF MDR-TB	200MG	ORAL	750MG	MDR-TB THERAPY
35	M	49	VOMITING (INTENSE), NAUSEA, COUGH		No	No	TAB METOCLOPRAMIDE 10MG B.D FOR 3/7	PYRAZINAMIDE	TREATMENT OF MDR-TB	1000MG	ORAL		MDR-TB THERAPY
39	F	30.4	LEG CRAMPS, VOMITING, WEIGHT LOSS	Other	No	No	TAB PYRIDOXINE 50MG INCREASE FROM 100MG TO 150MG	TAB PYRAZINAMIDE	TREATMENT OF MDR-TB	1200MG	ORAL		MDR-TB THERAPY
45	M	69	NOISY SOUNDS IN EARS, STOMACH UPSET, EAR ECHE, FEVER, JOINT PAIN	Other	No	No	TAB DICLOPENAC 50MG B.D 5/7	LEVOFLOXACIN	TREATMENT OF MDR-TB	750MG	ORAL		MDR-TB THERAPY
16	F	59	INCOHERENT SPEECH AND BEHAVIOUR	Recovered fully			TAB ARTANE, I M MODECATE, TAB CHLORPROMAZINE	CYCLOSERINE	TREATMENT OF MDR-TB	750MG	ORAL		MDR-TB THERAPY
35	M	59	LEG SWELLING, INTENSE PAIN, FEVER	Recovered fully	No	No	TAB DICLOFENAC 50MG B.D FOR 5 DAYS	LEVOFLOXACIN	TREATMENT OF MDR-TB	750MG	ORAL	750MG	MDR-TB THERAPY
34	M	69	NAUSEA, INSOMNIA, CONSTIPATION, ABDOMINAL PAIN, VOMITING, RINGING EAR SENSATION	Other	No	No	CHANGE TO CAPREOMYCIN, TAB LEVOTAN, ORS	KANAMYCIN INJ	TREATMENT OF MDR-TB	1000MG	I M	750MG	MDR-TB THERAPY
34	M	61	EAR PAIN, DIFFICULTY HEARING, JOINT PAIN	Other	No	No	TAB PARACETAMOL 500MG TDS 5/7	PYRAZINAMIDE	TREATMENT OF MDR-TB	1800MG	ORAL		MDR-TB THERAPY
30	F	81	DIZZINESS	Other	No	No		EFV/3TC/TDF	ART		P. O	960MG	PROPHYLAXIS
50	F	54	DIZZINESS, HEADACHE	Recovered fully	No	No		EFV/3TC/TDF	ART TREATMENT		P O		ART PROPHYLAXIS
60	M	40	COUGH, LOSS OF APPETITE	Recovered fully	No	No	ASCOREX, MULTIVITE	EFV/3TC/TDF	ART		P O
50	M	55	FEVER, DYSUREA, FREQUENT STOOLING	Other				EFV/3TC/TDF	HIV/AIDS	960MG	P O	960MG	PROPHYLAXIS
27	F		MALAISE, COUGH	Other	No	No		EFV/3TC/TDF	HIV/AIDS	600/300/300	P O
38	M	53	FEVER	Other	No	No		CTX	O.I IN ARV	960MG	P O	1	HIV TREATMENT
28	F	49	MALAISE	Other	No	No		EFV/3TC/TDF	ART TREATMENT	600/300/300	P O		ART PROPHYLAXIS
40	M	50	TRANSIENT ABDOMINAL DISCOMFORT	Other	No	No		EFV/3TC/TDF	HIV/AIDS	600/300/300	P O
52	M	51	ABDOMINAL DISCOMFORT, MALAISE	Other	No	No		EFV/3TC/TDF	HIV/AIDS	600/300/300	P O
38	F	53	ABDOMINAL DISCOMFORT	Other	No	No		CTX	ART-OI PROPHYLAXIS	960MG	P.O	1	HIV MANAGEMENT
40	M	44	HEADACHE	Other	No	No		CO-TRIM TAB	ART-PROPHYLAXIS	960MG	P.O	1	HIV PROPHYLAXIS
40	M	59	ABDOMINAL DISCOMFORT, DIZZINESS	Other	No	No		EFV/3TC/TDF	HIV/AIDS	600/300/300	P.O
30	F	54	HEADACHE, DIZZINESS	Other	No	No		EFV/3TC/TDF	ART	600/300/300	P.O
25	F	64	HEADACHE	Recovered fully	No	No		EFV/3TC/TDF	ART	600/300/300	P O
30	M	67	COUGH	Recovered fully	No	No		EFV/3TC/TDF	ART	600/300/300	P O
35	F	40	MODERATE INTERMITENT, COUGH	Other	No		COUNSELLED	CHITRIM	PROPHYLAXIS AGAINST O I IN HIV MGT	960MG	ORAL	INOCTE	HIV MANAGEMENT
24	M	10	INEFFECTIVENESS OF DRUG	Recovered fully		No	PATIENT GIVEN ANOTHER BRAND OF DIAZEPAM	DIAZEPAM	FEBRILE CONVULSION	5MG	IV		TO REDUCE FEVER, ANTIMALARIA
75	M	72	HICCUPS	Other		No	PATIENT GIVEN CHLOPROMAZINE INSTEAD	DIAZEPAM	MUSLE RELAXANT	20MG	IV
48	F	58	ABDOMINAL PAIN, EYE SIGHT PROBLEM	Recovered fully	No	No	PATIENT REFERRED TO EYE CLINIC/ ANTIBIOTIC	ISONMIZID BP 300MG	TUBERALLOSIS		ORAL
60	M	45	PRURITIS, RASHES AND SKIN BLISTERS	Other	No		ANTIBIOTICS AND ARTIMISTAMINE	CTX	O I PROPHYLAXIS	960MG	ORAL		ART, SKIN RASHES, APPETITE
50	F	65	ITCHING THROAT, SORE THROAT, COUGH		No		ANTIBIOTICS AND ARTIMISTAMINE	ISONIAZID 300MG	ANTI-TB	300MG	ORAL		ART PROPHYLAXIS
60	F	40	COUGH, DROWSINESS, STOOLING	Recovered fully	No		ANTIBIOTICS, COUGH TABLET AND LOMOTIL CAPSULES	TENOVIR/LAM(EFV)	ANTI TUBERCULOSIS	1DAILY	ORAL		ANTI TUBERCULOSIS, OI PROPHYLAXIS, TO STOP STOOLING
45	F	54	COUGH, CATARRH AND BODY PAIN	Recovered fully	No	No	ANTIBIOTICS, COUGH TABLET AND IBUPROFEN	TENOVIR/LAM(EFV)	TREATMENT OF HIV/AID		ORAL		FOR PAIN, BLOOD TONIC, OI PROPHYLAXIS
43	F	60	TINGLING SENSATION, PAIN	Other	No	No	BRUFEN, NEOROVITE AND COUNCELLING	LAMIVUDINE/NVP	HIV/AIDS	T B.D	ORAL		OI PROPHYLAXIS, HAEMATINICS
37	F	46	STOMACH ACHE, STOOLING	Recovered fully	No	No	ANTIBIOTIC, ORS AND LOPERAMIDE WAS GIVEN TO CLIENT	LAMIVUDINE/NVP/ ZDV	HIV/AIDS	T B.D	ORAL		OI PROPHYLAXIS, HAEMATINICS
38	F	50	COLD, COUGH	Recovered fully	No		ANTIBIOTIC, COUGH TAB	LAMIVUDINE/NVP/ ZDV	HIV/AIDS		ORAL		OI PROPHYLAXIS
43	M	71	PRURITIS, RASHES OVER THE SKIN	Recovered fully	No		FLUCONAZOLE, ARTIMISTAMINE AND ANTIFUNGI CREAM	LAMIVUDINE/NVP/ ZDV	HIV/AIDS	T B.D	ORAL		APPETITE STIMULATION, OI PROPHYLAXIS
42	F	58	ITCHING, HEAVINESS, PAIN	Recovered fully	No		FLUCONAZOLE, ARTIMISTAMINE AND PAIN RELIEVER	EFV/3TC/TDF	HIV/AIDS	T NOCTE	ORAL		OI PROPHYLAXIS
57	M	42	TINGLING SENSATION OF THE HANDS, NIGHT SWEATS	Recovered fully	No		NEUROVITE CG-GLUTAMIN TAB WAS PRESCRIBED	LAMIVUDINE/ TENOVIR/IFAVI	HIV/AIDS	T NOCTE	ORAL		OI PROPHYLAXIS, HAEMATINICS
	F	60	PRURITIS, RASHES, DARK SPORT	Recovered fully	No		CREAM CLOTRIMAZOLE, WITH SEPTRIN	CO-TRIMOXAZOLE	O I PROPHYLAXIS	2 TABLET AT NIGHT	ORAL		ANTI RETROVIRAL, HEAMETANIC
37	F	70kg	NAUSEA, COUGH, CHEST PAIN	Recovered fully	No				PREVENTION OF TB	300MG	ORAL	TT NOCTE	OI PROPHYLAXIS
37	F		RASHES ALL OVER THE BODY,	Other	No			EFV/COTRIM	ARV/OI	960/300/300/600	ORAL		ARV
36	F		DRYNESS OF THE THROAT	Recovered fully	No	No		CO-TRIMOXAZOLE	ARV PROPHYLASIS	100	ORAL		ONGOING
50	M		SERIOUS PRURITIS, RASHES ALL OVER THE BODY, BLACK SPOT		No	No		CO-TRIMOXAZOLE	ARV PROPHYLASIS	960	ORAL		ARV
52	F		DIZZINESS, STAGGERING FALLING, DIARRHEA	Recovered fully	No		LOPERAMIDE, PT STOPPED THE DRUGS	TENOVIR	ARV	600MG	ORAL
27	F		BURNING, ITCHING, RASHES WITH DARK PATCHES ALL OVER HER BODY		Yes		ONGOING	CO-TRIMOXAZOLE	O I	960	ORAL		ARV
39	F		BODY ITCHING, RASHES	Other	No	No		CO-TRIMOXAZOLE	ARV	100	ORAL		HAART
24	F	50	WEAKNESS, DIZZINESS, DRYNESS OF THE FEET, INTERNAL HEAT	Other	No			3TC, TDF, EFV	ARV	300/300/600	ORAL	960MG
38	M		SWELLING OF THE GUMS OF THE TEETH, PAINFUL WOUND IN THE MOUTH	Recovered fully	No			CO-TRIMOXAZOLE	OPPORENISTIC	960	ORAL	500MG	RTA
27	F		BODY ITCH	Recovered fully	No			CO-TRIMOXAZOLE	ARV		ORAL		HAART
	M		ITCHING OF THE BODY, RASHES	Recovered fully	No			CO-TRIMOXAZOLE	ARV	OD	ORAL	OD	ARV
36	F		HEADACHE, INCREASED MISTRAL PAIN PER MONTH, LOSS OF WEIGHT OVER TIME	Recovered fully	No				ANTIRETROVIRAL THERAPY	1 TAB DARLY	ORAL
36	M	65	BODY RASHES	Recovered fully	No				IPT	300MG DAILY	ORAL		ANTI-RETROVIRAL THERAPY
	M		INSOMNIA, CONSTIPATION,SKIN REACTION	Recovered fully	No				HIV	600MG	PER ORAL	300MG	HIV
36	F	50	INSOMNIA, RASH, HEADACHE	Recovered fully	No				ANTIRETROVIRAL THERAPY	1 TAB DAILY	ORAL
9	F		HYPERSENTIVITY REACTION	Recovered fully	No				MUSCLE STIFFNESS	THRICE DAILY	ORAL	3xDAILY
25	M		STOMACH CRAMP	Recovered fully	No			ROBEPMOLE 20MG	ULCER THERAPY	1TAB DAILY	ORAL		ULCER THERAPY
36	F	59	VOMITING, INSOMNIA	Recovered fully					ANTI-RETROVIRAL		ORAL
46	F	65	MENNORHAGIA	Recovered fully	No				IPT	300MG	ORAL	ORAL	HIV
30	F	53	GENERAL BODY WEAKNESS, FEVER, NAUSEA	Recovered fully	No				HIV	600MG	ORAL		HIV PROPHYLAXIS
65	F		NUMBNESS IN THE FINGERS, PERIPHERAL NEUROPATHY	Recovered fully	No				IPT	300MG DAILY	ORAL		ANTI-RETROVIRAL THERAPY
45	F	45	GENERAL BODY WEAKNESS, TIREDNESS	Recovered fully	No				IPT	300MG	ORAL		HIV
44	F	104	CONFUSION, RASHES, EPIGASTRIC PAIN, DIARRHOEA	Recovered fully	No				HIV	600MG	ORAL	300MG	HIV
35	M	57	INSOMNIA, EATING TOO MUCH		No				ANTIRETROVIRAL THERAPY	1TAB DAILY	ORAL
42	F	93	COUGH, BODY WEAKNESS, LOSS OF APPETITE	Recovered fully	No				IPT	300MG DAILY	ORAL		ANTI-RETROVIRAL THERAPY
42	F	62	COLD, NUMBNESS OF THE FEET AND TOES	Recovered fully	No	No		3TC, TDF, EFV	ART		ORAL	960MG	PROPHYLAXIS
50	M		COLD, NUMBNESS OF THE FEET AND TOES	Recovered fully	No	No	NONE	3TC, TDF, EFV	ART		ORAL		TB TREATMENT
39	F		DIZZINESS	Recovered fully	No		CONSELLED	3TC, TDF, EFV	ARV		ORAL	960MG	PROPHYLAXIS
44	F	81	DEHYDRATION, DRYNESS OF THROAT, TIREDNESS AND PALPITATION	Recovered fully	No		COUNSELLED TO DRINK WATER ADEQUATELY	AZT/3TC/NVP	ART		ORAL	960MG	PROPHYLAXIS
56	M		SEXUAL DYSFUNCTION, PERIPHERAL NEUROPATHY	Other	No	No	TAB NEUROVITE 200MG BD	ISONIAZID	TB PROPHYLAXIS	300MG DAILY	ORAL	960MG	ART PROPHYLAXIS
32	F		BODY ITCHING, MACULOPAPULAR RASH, LYMPHADENOPATHY	Recovered with disability	No	No	CAPS FLUCONAZOLE	AZT/3TC/NVP	ART		ORAL	960MG	PROPHYLAXIS
43	F		LOCALISED ITCHING, RASHES	Other	No	No	TAB CARBAMAZEPINE, TAB ACYCLOVIR 800MG	TDF/3TC/EFV	ART		ORAL	960MG	PROPHYLAXIS
45	F		INSOMNIA, DIZZINESS	Recovered fully	No	No	COUNSELLED	3TC, TDF, EFV	ART		ORAL	960MG	PROPHYLAXIS
53	F		SEVERE BODY ITCHING	Recovered fully	No	No	TAB LORATADINE 10MG DAILY	AZT/3TC/NVP	ART		ORAL	960MG	PROPHYLAXIS
31	F		DIARRHOEA, DYSMONORRHEA, INSOMNIA, FATIGUE	Recovered fully	Yes		5% DEXTROSALINE, ORS		ART		ORAL
38	F		DIARRHOEA, VOMITING, RASHES, ITCHING, GENERAL BODY WEAKNESS	Recovered fully	Yes	No	IV CIPROTAB, IV FLAGYL, 5% D/SALINE, CAPS AZITHROMYCINE	3TC, TDF, EFV	ART		ORAL	960MG	PROPHYLAXIS
48	F		RASHES, SEVERE BODY ITCHING	Recovered fully	No	No	TAB LORATADINE 10MG DAILY	3TC, TDF, EFV	ART		ORAL	960MG	PROPHYLAXIS
58	F	68	NAUSEA, ITCHING, GIT UPSET	Recovered fully	No		DRUG WITHDRAWN	CTX	PROPHYLAXIS AGAINST O I IN HIV MGT	960MG	ORAL	200MG	ORAL THRUSH
48	M	65	TIREDNESS, ANAEMIA	Recovered fully	No		WITHDRAWAL OF THE DRUG(ZIDOVUDINE)	ZIDOVUDINE	HIV	300 B.D	ORAL		HIV TREATMENT
43	M	59	FATIGUE, MALAISE, ANOREXIA	Recovered fully	No		DRUG SWITCH TO TENOFOVIR/LAMIVUDINE/EFAVIRENZ(300/300/600MG)	ZDV/3TC/NVP	HIV TREATMENT		ORAL	960MG	PROPHYLAXIS
51	M	82	ANOREXIA, TRANSIENT YELLOWING OF THE EYES, GIT IRRITATION	Recovered fully	No		ADVISED TO TAKE DRUGS WITH FOOD AND PRESCRIBED MULTIVITAMINS AND FOLLOWED UP ON PHONE	ATAZANAVIR/RITONAVIR	HIV TREATMENT		ORAL	300/300
40	F	62	NAUSEA, VOMITING AND DIARRHOEA	Recovered fully	No		REHYDRATION WITH ORS	LOPINAVIR/ RITONAVIR	POST EXPOSURE PROPHYLAXIS		ORAL	300/300	POST EXPOSURE PROP
39	F	74	RASHES, GENERAL BODY ITCHING	Recovered fully	No		DRUG WITHDRAWN	COTRIMOXAZOLE	PROPHYLAXIS	960MG	ORAL
22	F	43	FREQUENT URINATION	Recovered fully	No			OFLOXACIN+OMIDAZOLE(200/500MG)	URINARY TRACT INFECTION	200/500 B.D	ORAL	2G START	UTI
55	F	57	NAUSEA , VOMITTING, GENERAL BODY WEAKNESS	Recovered fully	No		PRESCIBED MULTIVITAMINS	LAMIVUDINE/NVP/ ZDV	HIV TREATMENT	150/300/200MG	ORAL		PROPHYLAXIS FOR OIS ORAL THRUSH
55	M	64	INSOMNIA	Recovered fully	No		COUNSELLED TO DRINK DRUGS ON EMPTY STOMACH AND PRESCRIBED SEDATIVES	TDF/3TC/EFV	HIV TREATMENT	300/300/600MG	ORAL
56	F	72	SLEEP TALKING, FEELING LIKE HEAD IS SPLITING IN TO TWO	Recovered fully	No		PATIENT COUNSELLED AND FOLLOWED UP UNTIL REACTION STOPPED	TDF/3TC/EFV	HIV TREATMENT	300/300/600	ORAL
52		76	ITCHING OF EYES	Recovered fully	No		RECOVERED	HALOFANTINE	MALARIA	500MG	ORAL
27	F	66	COUGH	Recovered fully	No		CYRUP COFLIN	ARTEMETER	MALARIA	T B.D	ORAL
26		75	WEAKNESS, HEAVINESS OF CHEST	Recovered fully	No		RECOVERED FULLY	AMOXYCILLIN	LRTI	625MG BD	ORAL	10MG BD	CORYZA
37		71	VOMITTING	Recovered fully	No		RECOVERED FULLY	METRODAZOLE	PTD	400MG TDS	ORAL
46	M	82	PASSAGE OF LOOSE STOOL	Recovered fully	No		RECOVERED FULLY	ARTEMETER	MALARIA		ORAL
45	M	69	WEAKNESS, DIZZINESS	Recovered fully	No		RECOVERED FULLY	AMODIAQUIN	MALARIA		ORAL
29	M	70	TINGLING, SENSATION IN THE LEGS	Recovered fully	No		COUNSELLED, TABS MULTIVITAMINS	ARTEMETER	MALARIA	160MG
31	M		ITCHING	Recovered fully	No		TABS LORATIDINE 10MG	ARTEMETER	MALARIA		ORAL
25		70	ABDOMINAL PAIN	Recovered fully	No		RECOVERED FULLY	PROGUANIL	MALARIA	200MG	ORAL
24	F	65	PAINFUL ON SWALLOWING	Recovered fully	No		RECOVERED FULLY	D. HYDRO	MALARIA	3 TABS x 3 DAILY	ORAL
32	F	60	NAUSEA, VOMITTING, SKIN RASH	Recovered fully	No		TABS PIRITON	AZT/3TC/NVP	ART	1 TAB DAILY	ORAL		PROPHYLAXIS
33	M	56	NAUSEA, VOMITTING, ANOREXIA , CHEST DISCONFORT, SKIN RASH	Recovered fully	No		REASSURANCE, TABS PLASIL, PIRITON ETC	TDF/3TC/EFV	ART	ONE TAB DAILY	ORAL		PROPHYLAXIS
40	F	48	ARTHRALGIA	Recovered fully			REASSURANCE, TAB IBUPROFEN	TDF/3TC/EFV	ART	1 TAB DAILY	ORAL		PROPHYLAXIS
50	F	72	SKIN RASH, MUSCLE PAIN	Recovered fully	No		TAB LORATADINE, TAB IBUPROFEN	AZT/3TC/NVP	ART	1 TAB DAILY	ORAL	960MG	PROPHYLAXIS
40	M	81	DRY MOUTH, CHEST PAIN, ANAEMIA, FATIGUE, MALAISE	Recovered fully	No		TAB FOLIC ACID, ORS	TDF/3TC/EFV	ART	1 TAB DAILY	ORAL	960MG	PROPHYLAXIS
45	M	46	LOSS OF APPETITE, CHEST PAIN, RASH, MYALGIA, ANAEMIA, FATIGUE, MALAISE	Recovered fully	No		REASSURANCE, TAB CIMETIDINE	TDF/3TC/EFV	ART	1 TAB DAILY	ORAL	960MG	PROPHYLAXIS
48	M	59	DEPRESSION, DRY MOUTH, CHEST PAIN	Recovered fully	No	No	ORS, OMEPROGINE, REASSURANCE	AZT/3TC/NVP	ART	1 TAB DAILY	ORAL	960MG	PROPHYLAXIS
30	F	92	ANOREXIA, DEPRESSION, PAIN AND TINGLING IN LIMBS, OEDEMA, PALPITATION, MYOPATHY	Recovered fully	No		REASSURANCE, TAB LORATIDINE, IBUPROFEN	AZT/3TC/NVP	ART	1 TAB DAILY	ORAL	960MG	PROPHYLAXIS
42	F	55	LOSS OF APPETITE (ANOREXIA), PALPITATION, HYPERPIGMENTATION, ANAEMIA, FATIGUE, MALAISE, PAIN, TINGLING AT FEET AND HAND	Recovered fully	No		REASSURANCE, TAB VIT B6, FOLIC ACID	TDF/3TC/EFV	ART	1 TAB DAILY	ORAL	960MG	PROPHYLAXIS
51	F	61	PAIN AND TINGLING IN FEET	Recovered fully	No		TABS DOLOMIT B, REASSURANCE	TDF/3TC/EFV	ART	1 TAB DAILY	ORAL		PROPHYLAXIS, GENERAL WELL BEING
41	F	54	GEN MACULO-PAPULA RASH , ITCHING	Other			LORATIDINE, CALAMIN, LOTIM	AZT/3TC/NVP	RVD		ORAL		CONTRACEPTION
44	F	64	JOINT ACHE, DEPRESSION, INSOMNIA	Recovered fully	No	No	REASSURANCE, PAIN RELIEVE GIVEN	COMBIPARK	PTB	RB	ORAL	100MG	PAINS
31	F	60	VOMITING, DIZZINESS	Recovered fully	No	No	IVF, METOCHLOPROMIDE	CIPROFLOXACIN	HEPATITIS B	200MG	INTRAMUSCULAR (IM)		MALARIA INFECTION
41	F	80	2016-03-09	Recovered with disability	No		IVF	COPTOFLOXACIN	TYPHOID	200MG	IV		MALARIA, TYPHOID
40	M	75	HEADACHE, DIZZINESS, DIARRHOAE	Recovered fully	Yes	No	IVF	ARTERSUNATE	MALARIA	120MG	INTRAMUSCULAR (IM)		TYPHOID, PAIN, HEADACHE
24	F	58	DIZZINESS	Recovered fully	No	No	PCM INJ	CHLOROQUINE	MALARIA		INTRAMUSCULAR (IM)		FEVER
34	F	72	ITCHING , FLUSH IN THE VEIN	Recovered fully	No	No	INFUSION WAS STOPPED	CIPROFLOXACIN	PELVIC INFLAMMATION	200MG	INTRAMUSCULAR (IM)		PID, PAINS,
28	F	58	REDNESS, PAIN AT INJECTED SITE	Recovered fully	No	No	COLD COMPRESS	PRIMOLUTE	THREATEN ABOTION	500MG	INTRAMUSCULAR (IM)		HAEMATENIC
41	F	85	HOT FLUSH ON IV SITE	Recovered fully	No	No	STOPPED MEDICATION	CIPROFLOXACIN	TYPHOID	200MG	INTRAMUSCULAR (IM)		MALARIA, PAINS
56	F	65	URTICAERIA RASH, TACHYCARDIA, WEAKNESS	Recovered fully	No	No	STOPPED MEDICATION	SALBUTAMOL	URTI		ORAL		INFECTION, ANTIHISTAMINE
3	F	20	VOMITING, ABDOMINAL PAIN	Recovered fully	No	No	METOCHLO	FLAGYL	SEPSIS	200MG	IV		MALARIA, PAINS
40		86.5	SEVERE VOMITING, BITTER TASTE, WEAKNESS	Recovered fully	No	No	PATIENT REASSURED	CEF	ENTERIC		INTRAMUSCULAR (IM)	500MG	DIARRHOAE
38	F	68	RASH ON HER HANDS, BODY WEAKNESS	Recovered fully	No	No	PREDNISOLONE, LORATIDINE TABS	SULPHADINE	IPT		ORAL
29	F	60	RASH ALL OVER BODY, RESTLESS, WEAK	Recovered fully	No	No	LORATIDINE TABS		IPT		ORAL
33	F	75	SERVERE DIARRHEA, VOMITING AND WEAKNESS ALL OVER BODY AND RESTLESS	Recovered fully	No	No		CHLOROQUINE	MALARIA	2001-02-02	ORAL		ROUTINE PROGRAME
73	F	78	SEVERE SWELLING OF FACE AND LEGS, GENERAL BODY WEAKNESS	Recovered fully	No		PREDNISOLONE, LORATIDINE TABS	LISINOPID 10MG	HYPERTENSION	10MG	ORAL		HYPERTENSION
35	F		SEVERE RASH ALL OVER HER BODY	Recovered fully	No	No	LORATIDINE, PREDNOLOSONE	CLOTRIMAZOLE		980MG	ORAL		HIV TREATMENT
	F	82	SEVERE RASHES ALL OVER BODY	Recovered fully	No	No	PREDNESOLONE, PIRITON	EFV/TDF	HIV/AIDS	300MG	ORAL		HIV
35	F	58	SEVERE RASH ALL OVER HER BODY,	Recovered fully	No	No	PIRITON, PREDNOSOLONE TABS	CLOTRIMAZOLE	PROPHYLAXIS		ORAL		HIV
28	F	64	RASH OVER THE BODY, WAS VERY WEAK	Life Threatening	No		PREDNISOLONE, LORATIDINE TABS	SULPHADINE	IPT		ORAL
25	M	70	SEVERE HEADACHE, DIZZINESS, STRANGE DREAMS	Recovered fully	No	No	PATIENT WAS REASSURED ON THE SIDE EFFECTS OF THE DRUGS	EFV	MG OF HIV	600MG	ORAL		OI PROPHYLAXIS, ONGOING
30	F	42	SEVERE PAINFUL SENSATION AT THE UPPER TRUNK, INSOMNIA	Other	No	No	REASSURANCE ON THE SIDE EFFECT OF THE DRUG	EFV	MGT OF HIV	600MG	ORAL		OI PROPHYLAXIS, MGT OF HIV
30	F	59	MULTIPLE SKIN RASHES, SEVERE ITCHING	Recovered fully	No	No	SEPTRIN WAS IMMEDIATELY DISCONTINUED	CTX	O I PROPHYLAXIS	960MG	ORAL		MGT OF HIV
32	F	52	STRANGE DREAMS, NIGHT SWEATS	Recovered fully	No	No	REASSURANCE ON THE SIDE EFFECT OF THE DRUG	EFV	MGT OF HIV	600MG	ORAL		OI PROPHYLAXIS, MGT OF HIV
27	M	55	DIZZINESS, GEN BODY WEAKNESS, CONFUSION	Recovered fully	No	No	PATIENT WAS REASSURED ON THE SIDE EFFECTS OF THE DRUGS	EFV	MG OF HIV	600MG	ORAL		OI PROPHYLAXIS, MGT OF HIV
25	F		INTENSE ITCHING, RASHES, BOILS	Recovered fully	No	No	SEPTRIN WAS IMMEDIATELY DISCONTINUED	CO-TRIMOXAZOLE	EFV,TENOFOVIR,LAMIVUDINE		ORAL		MGT OF HIV
30	F	55	DIZZINESS, GENERAL BODY WEAKNESS, STRANGE DREAMS	Recovered fully	No	No	PATIENT WAS REASSURED ON THE SIDE EFFECTS OF THE DRUGS	EFV/3TC/TDF	MANAGEMENT OF HIV	600MG	ORAL		OI PROPHYLAXIS, MGT OF HIV
38	F	68	DIZZINESS, NAUSEA, STRANGE DREAMS	Recovered fully	No	No	REASSURANCE ON THE SIDE EFFECT OF THE DRUG	EFV	MGT OF HIV	600MG	ORAL		OI PROPHYLAXIS, MGT OF HIV
30	F	50	DIZZINESS, GENERAL BODY WEAKNESS, NAUSEA, LOSS OF APPETITE	Recovered fully	No	No	TABS M/VITE, TABS VIT C	ACTM	PX OF MALARIA		ORAL		MGT OF HIV
16	F	41	RASHES ON THE FACE, ITCHING ALL OVER THE BODY	Other	No	No	SEPTRIN WAS IMMEDIATELY DISCONTINUED	CTX	O I PROPHYLAXIS	960MG	ORAL		MGT OF HIV
45	M	66	GENERAL BODY RASHES, ITCHING	Recovered fully	No	No	SEPTRIN WAS IMMEDIATELY DISCONTINUED	CTX	O I PROPHYLAXIS	960MG	ORAL		MGT OF HIV
43	F	66	VIGINAL BLEEDING, STRANGE DREAMS	Recovered fully	No	No	PATIENT WAS REASSURED ON THE SIDE EFFECTS OF THE DRUGS	EFV	MGT OF HIV	600MG	ORAL		OI PROPHYLAXIS, MGT OF HIV
57	F	37	INSOMNIA, LOSS OF APPETITE, WEIGHT LOSS, GENERAL BODY WEAKNESS	Recovered fully	No	No	ABC/EFV WAS SWITCHED TO ATVF/3TC/AZT	EFV	MGT OF HIV		ORAL		MGT OF HIV
45	F	63	DIZZINESS, STRANGE DREAMS, CONFUSION	Other	No	No	REASSURANCE ON THE SIDE EFFECT OF THE DRUG	CTX	O I PROPHYLAXIS	960MG	ORAL		MGT OF HIV
36	F	68	RASHES ALL OVER THE BODY, ITCHING, RESTLESSNESS	Recovered fully	No	No	SEPTRIN WAS IMMEDIATELY DISCONTINUED	CTX	O I PROPHYLAXIS		ORAL		MGT OF HIV
48	M	71	PEELING OF THE LIPS, ITCHING	Recovered fully	No	No	SEPTRIN WAS IMMEDIATELY DISCONTINUED	CO-TRIMOXAZOLE	O I PROPHYLAXIS	960MG	ORAL		MGT OF HIV
36	F	68	DISCOLOURATION OF THE SKIN AND HAIR, ITCHING ALL OVER THE BODY	Other	No	No	SWITCH TO TDF/3TC/EFV	NVP	MGT OF HIV	200MG	ORAL		OI PROPHYLAXIS, MGT OF HIV
31	F	57	GENERAL BODY RASHES, ITCHING	Recovered fully			SEPTRIN WAS IMMEDIATELY DISCONTINUED	CTX	O I PROPHYLAXIS	960MG	ORAL		MGT OF HIV
43	F	113	GENERAL BODY RASHES	Recovered fully	No	No	COTRIMOXAZOLE WAS SUSPENDED	CTX	O I PROPHYLAXIS	960MG	ORAL		MGT OF HIV
26	F	87	SALIVATION, DIZZINESS, ITCHING	Recovered fully	No	No	SEPTRIN WAS IMMEDIATELY DISCONTINUED	CTX	O I PROPHYLAXIS	960MG	ORAL
33	F	74	FEELING OF MOVEMENT WITHIN THE WHOLE BODY	Recovered fully	No	No	COUNSELLED TO DRINK DRUGS ON EMPTY STOMACH AND PRESCRIBED SEDATIVES	CTX	O I PROPHYLAXIS	960MG	ORAL		MGT OF HIV
27	F	58	GENERAL BODY RASHES, ORAL THRUSH, ITCHING	Recovered fully	No	No	SEPTRIN WAS IMMEDIATELY DISCONTINUED	CTX	O I PROPHYLAXIS	960MG	ORAL		MGT OF HIV
28	F	52	STRANGE DREAMS, GENERAL BODY WEAKNESS, LOSS OF APPETITE	Recovered fully	No	No	PATIENT WAS REASSURED ON THE SIDE EFFECTS OF THE DRUGS	EFV	MGT OF HIV		ORAL		OI PROPHYLAXIS, MGT OF HIV
35	F	61	SKIN RASHES, ITCHING, SWOLLEN FACE AND PALMS	Recovered fully	No	No	DRUG WAS SUSPENDED	CTX	O I PROPHYLAXIS	960MG	ORAL		MGT OF HIV
48	M	63	GENERAL BODY RASHES, ITCHING	Other	No	No	ADVISED TO STOPPED TAKING SEPTRIN	CTX	O I PROPHYLAXIS	960MG	ORAL	960MG	MGT OF HIV
58	F	87	GENERAL BODY RASHES, ITCHING		No	No	SEPTRIN WAS IMMEDIATELY DISCONTINUED	CTX	O I PROPHYLAXIS	960MG	ORAL		MGT OF HIV
33	F	40	GENERAL BODY ITCHING,RASHES.	Recovered fully	No	No	SEPTRIN WAS DISCONTINUED	COTRIMOXAZOLE	O.IS PROPHYLAXIS	960MG	ORAL	600MG,300MG,300MG	MGT.OF HIV
38	F	70	GENERAL HOTNESS OF THE BODY,INCREASE IN THIRST,FEELING OF MOVEMENT OF OBJECT ON THESKIN	Recovered fully	No	No	REASSURED PATIENTS	EFAVIRENZE	MGT.OF HIV	600MG	ORAK	960MG,300MG,300MG	O.IS PROPHYLAXIS,MGT.OF HIV,MGT.OF HIV
25	M	62	DIZZINESS,GENERAL BODY WEAKNESS		No	No	REASSURED PATIENTS ON THE SIDE EFFECTS	EFAVIRENZ	MGT.OF HIV	600MG	ORAL	960MG,300MG,300MG	O.IS PROPHYLAXIS,MGT.OF HIV,MGT.OFHIV
45	F		RASHES,CHEST PAIN,ITCHING		No	No	SEPTRIN WAS DISCONTINUED	COTRIMOXAZOLE	O.IS PRHYLAXIS	960MG	ORAL	200MG,300MG,300MG	MGT.OF HIV
32	M	83	GENERAL BODY WEAKNESS, INCREASED FREQUENCY OF EATING OF FOOD		No	No	PATIENT WAS REASSURED	EFAVIRENZ	MGT.OF HIV	600MG	ORAL	960MG,300MG,300MG	O.IS PROHYLAXIS,MGT OF HIV
45	F	45	DIZZINESS,TOO MUCH SLEEP,STRANGE DREAMS		No	No		EFAVIRENZ	MGT.OF HIV	600MG	ORAL	960MG,300MG,300MG	O.IS PROPHYLAXIS,MGT.OF HIV,MGT.OF HIV
27		45KG	PROFUSED SWEATING,DIZZINESS,ITCHING ALL OVER THE BODY,STRANGE DREAMS	Other	No	No	PATIENT WAS REASSURED ON THE SIDE EFFECT OF THE DRUG T OF	EFAVIRENZ	MGT.OF HIV	600MG	ORAL	960MG,300MG,300MG	O.IS PROPHYLAXIS,MGT,OF HIV,MGT.OF HIV
28	M	52	CONFUSION, HALLUCINATION, IRRATIONAL TALK, LETHARGY, DIZZINESS, PSYCHITRATIC MANIFESTATIONS	Recovered fully	Yes	Yes	SYMPTOMATIC AND IMMEDIATE SUBSTITUTION OF ARV	EFV/LAMIVUDINE/TENOFOVIR	HIV	600/300/300	ORAL	1TAB	BODY PAIN
39	M	69	GENERALISED EDEMA, GENERALISED BODY PAIN	Recovered fully	No	No	VIT B COMPLEX, TAB DICLOFENAC		HIV	1 TAB DAILY	P O
38	M	59	PALLOR, FATIGUE, CHEST DISCOMFORT, WEIGHT LOSS	Recovered fully	Yes	Yes	2 UNITS OF BLOOD TRANSFUSED, 5%	LAMIVUDINE/NVP/ ZDV	HIV	1BD	PCM ORAL
	F		FACIAL PEDAL EDEMA, RASHES, BLOOD DYSCRASIA	Recovered fully	Yes	Yes	BLOOD TRANSFUSION		HIV	1BD	PO		CHEST INFECTION
	F	55	MACULOPAPULAR RASH	Recovered fully	Yes	No		LAMIVUDINE/ZIDOVUDINE/NVP	HIV	1BD	P O
50	M	50	STEVENS JOHNSON SYNDRUME	Recovered fully	No		TABS PIRITON, PREDISOLONE, ERYTHROMYCIN	CTX	ARV PROPHYLASIS	960MG	ORAL
35	F		PERIPHERAL NEUROPATHY, GENERALISED BODY RASHES	Other	No	No	TABS PYRIDOXIC 50MG, TABS CHLO		TB	4 OD	ORAL		HIV
28	F	40	PRURITIC RASH ALL OVER THE BODY	Other	No	No	CAP FLUCONAZOLE, LORATADINE, AMPICLOX AND CREAM	EFV/3TC/TNF	HIV	1 O.D	ORAL	960G	CPT
25	F		STEVENS JOHNSON SYNDRUME	Other	Yes	Yes	TABS PIRITON, PREDISOLONE, ERYTHROMYCIN, VIT C AND STOPPAGE OF COTRIMOXAZOLE	COTRIMOXAZOLE 400G	ARV PROPHYLASIS	960G	ORAL
26	F	49	PARATHESIA, ATHRALGIA, MYOPATHY, SEVERE LOWER BACK INABILITY TO STRETCH	Other	No	No	NEUROVITE, DICLOFENAC	LAMIVUDINE/ZIDOVUDINE/NVP	HIV	1 BD	ORAL	960G	HIV
30	M	49	SEVERE AND CHRONIC ANAEMIC		Yes	Yes	BLOOD TRANSFUSION	PYRAZINAMIDE	MDRTB	1200MG	ORAL		MDRTB
30	M	49	ELECTROLYTE IMBALANCE		No	No	SLOORK, NUTRITIONAL SUPPORT	CAPREOMYCIN	MDRTB	500MG	PARENTHEAD (1/2)		MDRTB
30	M	49	PSYCLOSIS		Yes	Yes	CHLORPROMEZONE,DIAZEPAM ADDED	CYCLOSERINE	MORTB	500MG	ORAL		MDRTB
30	M	49	ENURESIS		No	No	PSYCLUEFRIST INVITED TO REVIEW AND COUNSEL	CYCLOSERINE	MORTB	500MG	ORAL		MORTB
30	M	49	ELEVATED UREA CREATININE		No	No		CAPREOMYCIN	MORTB	500MG	PARENTHEAD (1/2)		MORTB
42	M	50	FREQUENT DIARRHEA	Recovered fully	No	No	ORS, OMEPROGINE, REASSURANCE	PARA AMINO SALYCYLAPE	MORTB	8G	ORAL		XDRTS
42	M		HYPOKALAEMIA		No	No	SLOWK TAB, FLUDS, EDIBLE BANANA	CAPREOMYCIN	XDR TB	750MG			XDR TB
42	M	50	VOMITING	Recovered fully	No	No	MESOCHLORPRAMIDE INJ	PASALYALIT (PAS)	XDR TB	8G	ORAL		XDR TB
42	M	50	STIFFNESS OF UPPER AND LOWER EXTREMITIES	Recovered fully	No	No	CALCIUM TAB	BEDAQUILINE	XDR TB	400MG	ORAL		XDR TB
30	F	48	ELECTROLYTE IMBALANCE,		No	No	SLOWK TAB, FLUDS, EDIBLE BANANA	CAPREOMYCIN	XDR TB	750MG			XDR TB
75	F	55	INSOMENIA	Other	No		TAB LEXOTAN 8MG	EFV	HIV/AIDS		ORAL	960MG	PROPHYLAXIS
28	F	65	PAINS IN THE BONES OF THE TWO LEGS	Other	No		TAB CO-CODAMOL	CTX	PROPHYLAXIS	960MG	ORAL
36	F	68	GENERALIZED BODY PAIN	Other	No		TAB CO-CODAMOL	TENOFOVIR	HIV/AIDS	600/300/300	ORAL	960MG	PROPHYLAXIS
86	M	60	PARAESTHESIAS, INSOMNIA, INABILITY TO USE THE LOWER LIMB WELL	Other	No			NIFEDIPINE	HYPERTENSION	20MG	ORAL
33	F	46	STOOLING, DIARRHOEA	Other	No		TAB METRONIDAZOLE 400MG TDSX5/7	TENOFOVIR	HIV/AIDS	600/300/300	ORAL
60	F	60	HEADACHE, INSOMNIA	Other	No		TAB DIAZEPAM 10MG NOCTE, TAB PCM 1G TDS	NIFEDIPINE	HYPERTENSION	20MG	ORAL
29	M	74	GENERALISED PRURITIS, RASHES OVER THE BACK AND BOTH UPPER LIMBS	Recovered fully	No	No	IV HYDROCARTISONE, TAB LORATADINE	HEPATITIS B	VACCINATION	0.5MLS	INTRAMUSCULAR (IM)
43	F	67	GENERALISED ITCHING, GENERALISED BODY PAIN, HEADACHE AND VOMITING	Recovered fully	No		TAB PIRITON, TAB CYPROHEPTADINE	TENOFOVIR	HIV/AIDS	600/300/300	ORAL	960MG	PROPHYLAXIS
38	M	56	RASHES ON THE HEAD, PRURITIS	Other	No		TAB LORATADINE 10MG DAILY	TENOFOVIR	HIV/AIDS	600/300/300	ORAL
37	M	65	RESTLESSNESS, ABDOMINAL DISCOMFORT	Recovered fully	No		DISCONTINUATION OF THE SUSPECTED DAY	IBUPROFEN	SEVERE HEADACHE	400MG	ORAL	1G	SEVERE HEADACHE
36	M	42	PERSISTENT DIZZINESS, SEVERE WEAKNESS, FEVER	Recovered fully	No		DISCONTINUATION OF THE SUSPECTED DAY	EFV/3TC/TDF	HIV/AIDS	600/300/300	ORAL	960MG	OI PROPHYLAXIS
48	M	41	LACK OF APPETITE, LOSS OF BALANCE, CONTINUOUS VOMITING, SERIOUS LOSS OF WEIGHT, STOOLING, RASHES	Other	No		TAB LORATADINE, TAB IBUPROFEN	TENOFOVIR	HIV/AIDS		ORAL
4	M	11	FEVER, WEAKNESS OF THE BODY	Other	No		SYR PCM, TAB ACT	NVP	HIV/AIDS	600/300/300	ORAL
43	F	61	HEADACHE, INSOMNIA	Other	No		TAB DAZEPAM 10MG, PCM 1G	NIFEDIPINE	HYPERTENSION	20MG	ORAL
33	F	44	PERSISTENT VOMITING, PASSAGE OF LOOSE STOOL, CHILLS	Other	No		TAB PROMETHAMINE 25MG, TAB ACT	TENOFOVIR	HIV/AIDS	600/300/300	ORAL	960MG	PROPHYLAXIS
27	F	69	GENERALISED ITCHING, RASH	Recovered fully	No		DISCONTINUATION OF THE SUSPECTED DAY	VISOFES CAPSULES	HAEMATINICS IN PREGNANCY	1 TAB DAILY	ORAL
46	F	55	SEVERE HEADACHE, INSOMNIA, WEAKNESS OF THE BODY	Other	No		TAB DIAZEPAM	ARTEMETER	MALARIA		ORAL
24	F	61	DROWSINESS, SLEEPINESS	Recovered fully	No			LORATADINE	ALLERGY	10MG	ORAL
43	M	64	THIGH PAIN, INSOMNIA, BACK PAIN, HEADACHE, NOCTURIA	Other	No		TAB DIAZEPAM 10MG NOCTE, TAB PCM 1G TDS, IBUPROFEN	TENOFOVIR	HIV/AIDS		ORAL
48	M	6	SWOLLEN LEGS, BOILS ON THE BUTTOCKS, DYSENTRY	Other	No			ZIDOVUDINE	HIV/AIDS		ORAL	960MG	PROPHYLAXIS
47	F	38	PRURITIS	Other	No		TAB LORATADINE 10MG DAILY	CTX	PROPHYLAXIS	960MG	ORAL		HIV/AIDS
45	M	72	GENERAL BODY PRURITIS	Other	No		TAB LORATADINE 10MG DAILY	TENOFOVIR	HIV/AIDS	600/300/300	ORAL	750MG	PROPHYLAXIS
40	F	52	DEPRESSION, CONSTANT VOMITTING	Recovered fully	No		REGIMEN CHANGE TO AZT/3TC/NVP	TENOFOVIR	HIV/AIDS		ORAL
47	F	48	FREQUENT PASSAGE OF LOOSE STOOL, INTENSE DROWSINESS	Other	No			EFV	HIV/AIDS	600/300/300	ORAL
46	M	75	PRURITIS, RASHES ON THE HEAD AND IN THE PUBIC REGION	Other	No		TAB LORATADINE 10MG DAILY	CTX	PROPHYLAXIS	960MG	ORAL
35	F	58	ABDOMINAL DISCOMFORT	Other	No			CO-TRIMOXAZOLE	PROPHYLAXIS		ORAL
40	F	59	PUSTULAR RASHES ON THE FACE, HEADACHE, TENDERNESS OF RASHES	Other	No		CAP DOXYCYCLINE, PCM, CAP AMPICLIN ETC	CIPROFLOXACIN	INFECTIONS	500MG BD	ORAL
9	F	24	RASHES ALL OVER THE FACE AND THE ARM	Other	No		TAB LORATADINE 10MG DAILY, CEFUROXIME	CTX	PROPHYLAXIS	480MG	ORAL
79	F	59	INABILITY TO PASS STOOL FOR ABOUT ONE WEEK	Recovered fully	No			CODEINE PHOSPHATE/PARACETAMOL	PAINS		ORAL
60		70	RASHES ON THE BUTTOCKS, SORE IN THE ANUS	Recovered fully	No			CO-TRIMOXAZOLE	PROPHYLAXIS	960MG	ORAL
22	F	62	INSOMNIA, WEAKNESS, MOODY, FEVER, DIZZINESS, HEAVINESS OF HEAD	Other	No			TRIPROLIDINE HCL	COLD/CATHRR		ORAL
22		62	RASHES ON THE PALMS AND FEET, PRURITIS, TIREDNESS, WEAKNESS	Recovered fully	No		SEPTRIN WAS IMMEDIATELY DISCONTINUED	CO-TRIMOXAZOLE	TREATMENT AFTER SURGERY	960MG	ORAL
22	F	62	DIZZINESS, WEAKNESS, SLEEPLESSNESS, RESTLESSNESS, HEAVINESS OF HEAD	Recovered fully	No			PENTAZOCINE INJ B P	PRE-ANAESTHETIC MEDICATION	30MG	INTRA VEN
25	F	53	PERSISTENT HEADACHE FOR OVER A WEEK	Recovered fully	No		TAB PARACETAMOL 500MG TDS 5/7	TENOFOVIR	HIV/AIDS	600/300/300	ORAL
55	F	85	SEVERE HEADACHE ON THE FRONTAL LOBE, BLURRED VISSION	Other	No	No	PARACETIMOL, DIAZEPAM	AMLODIPINE	HIGH BLOOD PRESSURE	5MG	ORAL		HIV PROPHYLAXIS
25	F	49	BODY RASH, PRURITIS, ON THE UPPER LIMBS AND CHEST THAT RESULTED IN WOUNDS ON THE AFFECTED PARTS	Other	No	No	TAB CHLORPHENIRAMINE	TDF/3TC/EFV	HIV-INFECTION	600/300/300	ORAL	960MG	OI PROPHYLAXIS, MGT OF HIV
48	F	67	NUMBNESS IN BOTH FEET WITH ITCHING SENSATION ON THE LOWER LIMBS	Other	No	No	NEUROTEX, VIT B, B6, B12	TDF/3TC/EFV	HIV/AIDS	600/300/300	ORAL	960MG	OI PROPHYLAXIS, MGT OF HIV
34	M	60	SEVERE ANAEMIA, DYSPNEA, OCCASSIONAL DRY COUGH, EASILY FATIQUED	Other	Yes	No	BLOOD TRANSFUSION	TDF/3TC/EFV	HIV/AIDS	600/300/300	ORAL	960MG	OI PROPHYLAXIS, MGT OF HIV
24	F	55	SEVERE CHEST PAIN, DIZZINESS, JOINT PAIN AND BODY WEAKNESS	Recovered fully	No	No	HYDROCORTISON INJECTION	CEFTRIAXONE	TYPHOID	1G	INTRAVENOUS		MALARIA FEVER,HEADACHE, PAIN HELMINTIASIS
49	F	71.5	GENERAL BODY WEAKNESS, VOMITTING, NAUSEA	Recovered fully	Yes	No	IVF DEXTROSESALINE, INJ	ARTEMETER	MALARIA FEVER		ORAL		HIGH BLOOD PRESSURE, BODY PAIN, HEADACHE
50	F	81	INSOMNIA, RESTLESSNESS, FEELING CONFUSED	Recovered fully	No	No	DISCONTINUED DRUG, BROMAZEPAM	CIPROFLOXACIN	TYPHOID FEVER	500MG	ORAL		MALARIA FEVER, HEADACHE, ANTOLODANT
20	F	32	NECROSIS IN THE LEFT EAR	Other	No	No	SENT TO EAR CLENIC	EFV/3TC/TDF	ANTIRETROVIRAL THERAPY		ORAL		PROPHYLAXIS
31	M	60	WEAKNESS, JOINT ACHE	Recovered fully	No	No	CONTINUE INJ	KANAMYCIN INJ	MDRTB		INTRAMUSCULAR (IM)		PTB
21	M	62	RINGING IN THE EAR	Recovered fully	No	No	DISCONTINUED CTX	KANAMYCIN INJ	MDRTB		INTRAMUSCULAR (IM)		MDR-TB THERAPY
18	F	57	VOMITING (INTENSE), NAUSEA, COUGH	Recovered fully	No	No	AVOMINE, PYRIDOZINE	KANAMYCIN INJ	MDRTB		INTRAMUSCULAR (IM)		MDR-TB THERAPY
42	F	74	NAUSEA, VOMITING	Recovered fully	Yes	No	IVF	ARTEMETER	ANTIRETROVIRAL THERAPY		INTRAMUSCULAR (IM)		TYPHOID, PAIN, HEADACHE
11	M	34	DYSPNEA, HEADACHE	Recovered fully	No		DISCONTINUED CTX	COUGH EXPECTORANT	URTI	10MLS	ORAL		URTI
28	F	55	WEAKNESS, JOINT PAINT, HEADACHE	Recovered fully	No		STOPPED MEDICATION	ARTEMETER	ANTIMALARIA, PCM		ORAL		TYPHOID, PAIN, HEADACHE
50	F	59	SKIN RASHES	Recovered fully	No		TAB CIPROFLIXASIN 500MG B.D, TAB LORATIDINE, PIRITON	TDF/3TC/EFV	ART	1 TAB DAILY	ORAL		OI PROPHYLAXIS, MGT OF HIV
30	F	43	VOMITTING, WEAKNESS	Recovered fully	No		TAB METODOPRAMIDE, ORS, TAB ZINC, TAB MULTIVITAMIN	TDF/3TC/EFV	ART	1 TAB DAILY	ORAL	960MG	OI PROPHYLAXIS, MGT OF HIV
43	F	84	TACHYCARDIA	Recovered fully	No		TAB AMITRIPTILLINE 25MG, NOCTI, TAB PCM 500MG	TDF/3TC/EFV	ART	1 TAB DAILY	ORAL		OI PROPHYLAXIS, MGT OF HIV
60	F	42	NUMBNESS, TINGLING	Recovered fully	No		TAB PYRIDOXINE, TAB BCO, TAB FERROUS SULPHATE, TAB IBUPROFEN	AZT300/3TC150/NVP200MG	ART	1 TAB DAILY	ORAL	960MG	OI PROPHYLAXIS, MGT OF HIV
39	F	70	ANAEMIA	Recovered fully	No		REGIMEN SUBSTITUDE WITH TDF30/3TC300/EFV600MG NOCTE	AZT300/3TC150/NVP200MG	ART	1 TAB DAILY	ORAL	960MG	OI PROPHYLAXIS, MGT OF HIV
66	F	51	NUMBNESS AT THE EXTREMETIES, CONSTANT WEAKNESS	Recovered fully	No		TA B PYRIDOXINE, CAP ASTYMIN, TAB BCO	AZT300/3TC150/NVP200MG	ART	1 TAB DAILY	ORAL	960MG	OI PROPHYLAXIS, MGT OF HIV
37	F	90	PRURITIS	Recovered fully	No		TAB CHLORPHENIRAMINE 4MG NOCTI,	AZT300/3TC150/NVP200MG	ART	1 TAB DAILY	ORAL	960MG	OI PROPHYLAXIS, MGT OF HIV
46	F	57	PRURITIS	Recovered fully	No		TAB PREDNISETONE, TAB PIRITON, TAB CIPRO	CTX	O I PROPHYLAXIS	960MG	ORAL	1	SUPPLIMENT
56	M		ANAEMIA, GENERAL BODY WEAKNESS	Recovered fully	No		BLOOD TRANSFUSION	AZT300/3TC150/NVP200MG	ART	1 TAB DAILY	ORAL		OI PROPHYLAXIS, MGT OF HIV
35	F	36	SKIN RASHES, PRURITIS	Recovered fully	No		TAB CIPROFLIXASIN 500MG B.D, TAB LORATIDINE, PIRITON	TDF/3TC/EFV	ART	1 TAB DAILY	ORAL	960MG	OI PROPHYLAXIS
24	F	48	RASHES, ITCHING	Recovered fully	No		TAB CHLORPHENIRAMINE	TDF/3TC/EFV	ART	1 TAB DAILY	ORAL	960MG	OI PROPHYLAXIS
35	F	42	PRURITIS, NUMBNESS TINGLING OF TOES	Recovered fully	No		TAB AMITRIPTILLINE 25MG, NOCTI, TAB PCM 500MG	TDF/3TC/EFV	ART	1 TAB DAILY	ORAL	960MG	PROPHYLAXIS
48	F	55	PRURITIS, RASHES	Recovered fully	No		TAB CIPROFLIXASIN 500MG B.D, TAB LORATIDINE, PIRITON	AZT300/3TC150/NVP200MG	ART	1 TAB DAILY	ORAL	960MG	OI PROPHYLAXIS
40	F		STOOLING	Recovered fully	No		TAB CIPROFLIXASIN 500MG B.D, TAB LORATIDINE, PIRITON	TDF/3TC/EFV	ART	1 TAB DAILY	ORAL	960MG	OI PROPHYLAXIS
30	F	55	HALLICINATION, TARCHYCARDIA	Recovered fully	No		TAB AMITRIPTILLINE 25MG, NOCTI, TAB PCM 500MG		ART	1 TAB DAILY	ORAL	960MG	OI PROPHYLAXIS
42	F	76	PRURITIS, NUMBNESS AT THE FINGERS AND TOES	Recovered fully	No		TAB PYRIDOXINE, TAB BCO, CAP ASTYMIN	CTX	O I PROPHYLAXIS	960MG	ORAL	1 CAP B.D	SUPPLIMENT
32	F	45	RASHES, PRURITIS	Recovered fully	No		TAB CIPROFLIXASIN 500MG B.D, TAB LORATIDINE, PIRITON	TDF/3TC/EFV	ART	1 TAB DAILY	ORAL	1TAB	OI PROPHYLAXIS
34	F	52	PRURITIS, RASHES	Recovered fully	No		TAB LORATADINE 10MG DAILY	TDF/3TC/EFV	ART	1 TAB DAILY	ORAL	960MG	OI PROPHYLAXIS, MGT OF HIV
49	F	90	RASHES, PRURITIS	Recovered fully	No		TAB PREDNISETONE, TAB PIRITON, TAB CIPRO	CTX	O I PROPHYLAXIS	960MG	ORAL	300MG	IPT
36	F		RASHES, PRRURRITIS, CARBUNCLES	Recovered fully	No		TAB CIPROFLIXASIN 500MG B.D, TAB LORATIDINE, PIRITON	CTX	O I PROPHYLAXIS	960MG	ORAL	1. O . D	I P T
55	F	57	STEVEN JOHNSON SYNDROME	Recovered fully	No		REGIMEN SUBSTITUDE WITH AZT/3TC/EFV/R	TDF/3TC/EFV	ART	1 TAB DAILY	ORAL	1TAB	OI PROPHYLAXIS, MGT OF HIV
50	F	64	PERIPHERAL NEURITIS	Recovered fully	No		TAB PYNDOXINE, TAB CARBAMAZEPINE 200MG NOCTI	TDF/3TC/EFV	ART	1 TAB DAILY	ORAL	1TAB	OI PROPHYLAXIS, MGT OF HIV
49	F	66	NUMBNESS AT THE FINGERS	Recovered fully	No		TAB PYRIDOXINE, TAB BCO, CAP ASTYMIN	TDF/3TC/EFV	ART	1 TAB DAILY	ORAL	1	OI PROPHYLAXIS, MGT OF HIV
30	F	64	VOMITTING, HEAMATEMESIS	Recovered fully	No		TAB METROCLOPRAMIDE 10MG B.D	TDF/3TC/EFV	ART	1 TAB DAILY	ORAL	960MG	OI PROPHYLAXIS
33	F	59	PRURITIS, RASHES	Recovered fully	No		TAB LORATIDINE, TAB CIPROFLOXASIN, TAB PIRITON	TDF/3TC/EFV	ART	1 TAB DAILY	ORAL	1TAB	OI PROPHYLAXIS
44	F	29	STOOLING	Recovered fully	No		TAB CIPROFLIXASIN 500MG B.D, TAB LORATIDINE, O R S	TDF/3TC/EFV	ART	1 TAB DAILY	ORAL	960MG	OI PROPHYLAXIS
69	M	58	STOOLING	Recovered fully	No		TAB CIPROFLIXASIN 500MG B.D, TAB LORATIDINE, O R S	TDF/3TC/EFV	ART	1 TAB DAILY	ORAL	960MG	OI PROPHYLAXIS, MGT OF HIV
14	M	51.1	RASHES ON THE UPPER AND LOWER LIMBS AND THE CHEST	Other	No	No	HYDROCORTISON, PREDNISOLINE, PROMETHEZINE	AMOXI -CLAR 625	EAR INFECTION	1 BD	PO
25	F	46	DIZZINESS, PRURITIS, RASHES	Other	No	No	PIRITIN, INJ HYDROCORT	EFV/3TC/TDF	HIV/AIDS	600/300/300	PO		ITCHING, RASHES
30	F	78	DIZZINESS	Recovered fully	No	No		EFV/3TC/TDF	HIV/AIDS	600/300/300	P O	1TAB	HEADACHE
35	M	46	MUCOSAL ULCERS (PENILE, ORAL)	Recovered fully	No			ERYTHROMYCIN	500MG	1 TAB DAILY	2016-07-05
25	F	53	TRANSIENT HEADACHE, EPIGASTRIC PAIN	Other	No	No	TAB PCM, MMT	EFV/3TC/TDF	ART		P O		HEADACHE
45	F	45	BODY WEAKNESS	Other	No	No		EFV/3TC/TDF	ART	600/300/300	P O		OI PROPHYLAXIS, MGT OF HIV
25	M	50	RASHES	Other	No	No		EFV/3TC/TDF	HIV/AIDS	600/300/300	P O	1TAB	MGT OF HIV
55	M	72	COUGH	Death	No	No	ERYTHROMYCIN, AMOXICILLINE	CTX	O I PROPHYLAXIS	960MG	P O		COUGH
43	F	53	PRURITIS	Other	No	No	TAB CHLORPHENIRAMINE MALEATE PRN	CTX	O I PROPHYLAXIS	1 TAB DAILY	P O		HIV, FEVER
30	M	49	COUGH	Other	No	No	GENE EXPERT	LOPINAVIR/ RITONAVIR			P O	500MG	PROPHYLAXIS
30	M	52	TRANSIENT FEVER, HEADACHE, EPIGASTRIC PAIN	Other	No	No		CTX	O I PROPHYLAXIS	960MG	P O	1TAB	AIDS MGT
42	M	55	FEVER, HEADACHE, ANAEMIA	Recovered fully	No	No	REGIMEN SWITCHED	AZT/3TC/EFV			P O		ANALGESIA, FEVER
40	M	68	PAIN (FEET)	Other	No	No		AZT/3TC/NVP	HIV/AIDS	300/300/200	P O		OI PROPHYLAXIS, MGT OF HIV
40	F	63	PRURITIS	Other	No	No		CTX	O I PROPHYLAXIS	960MG	P O		HIV PROPHYLAXIS
30	M	72	HEADACHE, FEVER	Other	No	No		AZT/3TC/NVP	ART	300/300/200	P O		OI PROPHYLAXIS, MGT OF HIV
35	F	42	ABDOMINAL PAIN, EPIGASTRIC PAIN, HEADACHE, FEVER	Other	No	No		CO-TRIMOXAZOLE	O I PROPHYLAXIS	960MG	P O	300/300/600	ART
40	M	53	BODY WEAKNESS, FATIGUE	Recovered fully	No	No		CO-TRIMOXAZOLE	O I PROPHYLAXIS	960MG	P O	300/150/200	ART
22	M	66	RASHES, ITCHING	Other	No	No		AZT/3TC/NVP	ART	300/300/200	P O		OI PROPHYLAXIS, MGT OF HIV
35	F	64	INSOMNIA, FEVER	Other	No	No		AZT/3TC/NVP	HIV/AIDS	150/300/200MG	P O	960MG	PROPHYLAXIS
35	F	70	BACKCHE	Other	No	No		TDF/3TC/EFV	HIV/AIDS	300/300/600	P O	960MG	PROPHYLAXIS
27	F	48	FEVER, BODY PAIN	Other	No	No		AZT/3TC/NVP	HIV/AIDS	300/300/200	P.O	960	PROPHYLAXIS
30	F	50	FEVER	Other	No	No		TDF/3TC/EFV		600/300/300	P O	1TAB	HIV PROPHYLAXIS
34	F	51	FEVER	Other	No	No		AZT/3TC/NVP	HIV/AIDS	300/300/200	P O
30	M	49	DIZZINESS, FEVER	Other	No	No		TDF/3TC/EFV	HIV/AIDS	600/300/300	P O	960MG	PROPHYLAXIS
36	F	84	FEVER, DYPSNIA, HEADACHE	Other	No	No		TDF/3TC/EFV	HIV/AIDS	600/300/300	P O	960MG	PROPHYLAXIS
20	F	45	RASHES	Other	No	No		TDF/3TC/EFV	HIV/AIDS	600/300/300	P O	960MG	PROPHYLAXIS
45	M	40	DIAHOERRIA	Other	No	No			FOOD SUPPLIMENT	SPOONFUL	P O	1TAB	HIV
25	F	61	HEADACHE	Other	No	No		TDF/3TC/EFV	HIV/AIDS	600/300/300	P O	960MG	OI PROPHYLAXIS, MGT OF HIV
14	M	51.1	RASHES ON THE UPPER AND LOWER LIMBS AND THE CHEST	Other	No	No	HYDROCORTISON, PREDNISOLINE, PROMETHEZINE	AMOXI -CLAR 625	EAR INFECTION	1BD	P O
25	F	46	DIZZINESS, PRURITIS, RASHES	Other	No	No	PIRITIN, INJ HYDROCORT	EFV/3TC/TDF	HIV/AIDS	600/300/300	P O		ITCHING, RASHES
30	F	78	DIZZINESS	Recovered fully	No	No		EFV/3TC/TDF	HIV/AIDS	600/300/300	P O	1G DAILY	HEADACHE
50	F	41	FEVER, HEADACHE	Other				TDF/3TC/EFV	HIV/AIDS	300/300	PO
25	F	53	TRANSIENT HEADACHE, EPIGASTRIC PAIN	Other	No	No	TAB PCM,MMT	EFV/3TC/TDF	ART	600/300/300	P.O	1DAILY,2TS,2DAILY	HEADACHE,HEADACHE
45	F	45	BODY WEAKNESS	Other	No	No		EFV/3TC/TGF	ART	600/300/300	P.O	960MG, 1DAILY	O.I PROPHYLAXIS, AIDS MGT
25	M	50	RASHES	Other	No	No		EFV/3TC/TDF	HIV/AIDS	600/300/300	P.O	1DAILY	AIDS MGT
35	M	46	MUCOSAL ULCER(PENILE,ORAL)	Recovered fully	No	No		ERYTHROMYCIN	UII	500MG	ORAL
66	M	60	INTERMITENT COUGH	Other	No	No	PATIENT COUNSELLED TO INCREASE WATER INTAKE AND TO REPORT IF IT DID NOT IMPROVE	LISINOPILL BP 5MG	MANAGEMENT OF HYPERTENSION	5MG B .D	ORAL		ANTIDIABETICS
32	F	55	PRURITIS	Recovered fully	No	No	STOPPED REGIMEN AFTER COMPLETING THE DOSE	CIPROFLOXACIN	TREATMENT OF TYPHOID	500MG	ORAL		PAIN RELIEF
34	F	58	PERSISTENT STOMACHACHE	Recovered fully	No		CHANGED THE REGIMEN TO ATRIPLA	AZT/3TC/NVP	MGT OF HIV	1 TAB DAILY	ORAL	960MG	OI PROPHYLAXIS, MGT OF HIV
19	M	60	DIZZINESS	Recovered fully	No		CHANGED ANTIBIOTICS TO AMOXYCILLIN	CIPROFLOXACIN	TREATMENT OF TYPHOID	500MG	ORAL		PAIN RELIEF, HEAMATINICS,
70	F		SKIN RASHES	Recovered fully	No		STOPPED MEDICATION	AL4	ANTIMALARIA		ORAL		PAIN RELIEF, TYPHOID
39	F	80	SKIN RASHES	Other	No		COUNSELLED	EFV/3TC/TDF	MGT OF HIV		ORAL	960MG	OI PROPHYLAXIS, MGT OF HIV
40	F		INSOMNIA	Recovered fully	No		CHANGED MEDICATION TO P-ALAXIN	AL4	ANTIMALARIA		ORAL		PAIN RELIEF
33	F	58	GENERAL WEAKNESS	Recovered fully	No		STOPPED MEDICATION	AL4	ANTIMALARIA		ORAL		PAIN RELIEF
50	F	50	HEADACHE, NAUSEA, VOMITTING, DIZZINESS		No	No	ANTIMALARIA DRUG	LAMIVUDINE	TREATMENT OF HIV/AID		ORAL		OI PROPHYLAXIS, MGT OF HIV
30	F	49	COUGH, HEADACHE		No		COUGH MEDICINE AND ANTIMALARIA RECOMMENDED	LAMIVUDINE/NVP/ ZDV	TREATMENT OF HIV/AID	1 TAB DAILY	ORAL		OI PROPHYLAXIS, MGT OF HIV
35	F	44	STOMACH UPSET, PRURITIS	Other	No		ANTITUSTARINE AND	CTX	O I PROPHYLAXIS		ORAL
16	M	41	RASHES, ITCHING		No	No	PIRITIN, SEPTRIN WITHDRAWN AND FLUCONAZOLE	CO-TRIMOXAZOLE	O I PROPHYLAXIS	960MG	ORAL		ANTIBIOTIC
25	F	45	PRURITIS, FEVER				TAB PIRITON, STOP THE DRUG	CO-TRIMOXAZOLE	O I PROPHYLAXIS	960MG	ORAL	1TAB	MULTIVITAMIN
48			MUSCLE PAIN, SPASM IN THE LEFT LEG				NSAID AND NEUROVITE PRESCRIBED AND HAEMATINICS	TDF/3TC/EFV	ANTIRETROVIRAL		ORAL	960MG	OI PROPHYLAXIS, MGT OF HIV
32	M	52	FEVER, ITCHING, DRY MOUTH, STOOLING		No	No	TAB LOPERAMIDE, TAB PIRITON	TDF/3TC/EFV	ANTIRETROVIRAL	NOCTE	ORAL	960MG	OI PROPHYLAXIS, MGT OF HIV
38	F	51	EXCESSIVE URINATION		No	No	ORS	ISOMNIZED TAB	IPT	300MG	ORAL		ANTI-RETROVIRAL THERAPY
42	F	36	PIGMENTATION OF SKIN, ORAL THRUSH, PAINFUL GUM		No	No	NYSTATIN, FLUCONAZOLE AND ANTISMISTEMINE	LAMIVUDINE/ZIDOVUDINE	ANTIRETROVIRAL	1 TAB DAILY	ORAL		ANTI-RETROVIRAL THERAPY
37	F	78	COUGH	Recovered fully	No		ANTIBIOTIC AND COUGH DRUG	LAMIVUDINE/NVP/ ZDV	TREATMENT OF HIV/AID	1 TAB DAILY	ORAL		WEAKNESS, O I PROPHYLAXIS
45	F	66					REFERED TO DOCTOR	CO-TRIMOXAZOLE	O I PROPHYLAXIS		ORAL	1TAB	MULTIVITAMIN, ANTIRITROVARAL
50	M	54	ANAEMIA, GENERAL BODY WEAKENESS	Life Threatening	Yes		DRUG SWITCH, HAEMATINICS	AZT/3TC/NVP	ANTIRETROVIRAL	1 TAB DAILY	ORAL		OI PROPHYLAXIS
52	M	48	TINGLING SENSATION, HEADACHE		No	Yes	ANTIMALARIA DRUG	CO-TRIMOXAZOLE			ORAL	4 4 2	MALARIA TREATMENT
30	F	41	NECK PAIN, SHOULDER PAIN,COUGH		No		NSAID AND ANTIBIOTICS	CTX	O I PROPHYLAXIS		ORAL	1TAB	HAEMATINICS
42	M	48	TINNITUS				PATIENT WAS REASSURED ON THE SIDE EFFECTS OF THE DRUGS	KANAMYCIN INJ	TREATMENT OF MDR-TB	750MG	IM		MD2-TB
40	M	50	GENERAL BODY WEAKNESS				REASSURED, DOLO-META B- WES PRESCRIBED	PYRAZINAMIDE	TREATMENT OF MDR-TB	1.5G	ORAL		TREATMENT OF MDR-TB
80	F	33	PERSISTENCE VOMITTING				REASSURED, REHYDRATED	PYRAZINAMIDE	TREATMENT OF MDR-TB	1.5G	ORAL		TREATMENT OF MDR-TB
80	F	33	ELECTROLYTE IMBALANCE				SLOWK 300MG WAS PRESCRIBED AND ENCOURAGE TO TAKE BANNANA	CAPREOMYCIN	TREATMENT OF MDR-TB	500MG	INTRAMUSCULAR (IM)		TREATMENT OF MDR-TB
36	M	52	HEARING LOSS, TINNITUS				THE PATIENT IS REASSURED DRUG SWITCH	KANAMYCIN INJ	TREATMENT OF MDR-TB	750MG	IM		TREATMENT OF MDR-TB
42	M	48	BODY PAIN, JOIN PAIN, DIZZINESS				DOLO-METE B WAS PRESCRIBED	PYRAZINAMIDE	TREATMENT OF MDR-TB	1.5G	ORAL		TREATMENT OF MDR-TB
45	F	31	ABDOMINAL PAIN, LOSS OF APPETITE AND TEST, HEADACHE					PROTHONAMIDE	TREATMENT OF MDR-TB				TREATMENT OF MDR-TB
23	M	47	GENERAL BODY PAIN, JOIN PAIN				DOLO-METE B WAS PRESCRIBED	PYRAZINAMIDE	TREATMENT OF MDR-TB	1.5G	ORAL		TREATMENT OF MDR-TB
31	F	43	NAUSEA, VOMITTING, LOSS OF APPETITE				THE PATIENT WAS COUNSELLED, REASSURED, REHYDRATED	PROTHONAMIDE	TREATMENT OF MDR-TB	500MG	ORAL		TREATMENT OF MDR-TB
33	M	48	INSOMNIA, HEADACHE, GENERAL BODY WEAKNESS					CYCLOSERINE	TREATMENT OF MDR-TB	500MG	ORAL		TREATMENT OF MDR-TB
33	M	48	HEARING LOSS				PATIENT REASSURED, COUNSELLED AND KANAMYCIN SWITCH	KANAMYCIN INJ	TREATMENT OF MDR-TB				TREATMENT OF MDR-TB
31	F		GENERAL BODY WEAKNESS, HEADACHE					PYRAZINAMIDE	TREATMENT OF MDR-TB	1.5G	ORAL		TREATMENT OF MDR-TB
23	M	43	DELIRIUM, INSOMNIA				CYCLOSEMIC WAS STOPPED FOR 3 DAYS	CYCLOSERINE	TREATMENT OF MDR-TB	500MG	ORAL		TREATMENT OF MDR-TB
34	M	60	29/08/2016				THE PATIENT WAS COUNSELLED, REASSURED, REHYDRATED	PROTHONAMIDE	TREATMENT OF MDR-TB	500MG	ORAL		TREATMENT OF MDR-TB
26	F	45	IMSOMNIA				CYCLOSEMIC WAS STOPPED FOR 3 DAYS	CYCLOSERINE	TREATMENT OF MDR-TB	500MG	ORAL		TREATMENT OF MDR-TB
36	M	41	NAUSEA, VOMITTING, DIZZINESS				REASSURED, ORS AND PLESIL 10MG WAS PRESCREIBED	PROTHONAMIDE	TREATMENT OF MDR-TB	500MG	ORAL		TREATMENT OF MDR-TB
50	F	40	ABDOMINAL DISCOMFORT, LOSS OF APPETITE, NAUSEA, VOMITTING				PATIENT REASSURED AND PLASIL 10MG WAS PRESCRIBED	PROTHONAMIDE	TREATMENT OF MDR-TB	500MG	ORAL		TREATMENT OF MDR-TB
28	M	40	RINGING SENSATION ON BOTH EAR, INSOMNIA					CYCLOSERINE	TREATMENT OF MDR-TB	500MG	ORAL		TREATMENT OF MDR-TB
50	F	40	HYPOKALAEMIA					CAPREOMYCIN	TREATMENT OF MDR-TB	750MG	IM
36	M	52	EPIGASTRIC PAIN, GENERAL BODY WEAKNESS					PYRAZINAMIDE	TREATMENT OF MDR-TB			750MG	TREATMENT OF MDR-TB
10	M	35	SWELLING OF THE BODY				REASSURED AND COUNSELED	ARTEMETER	TREATMENT OF UNCOMPLICATED NALARIA	3TAB	ORAL		TREATMENT OF UNCOMPLICATED NALARIA
38	M	40	INSOMNIA, GENERAL BODY PAIN				REASSURANCE AND COUNSELLED	CYCLOSERINE	TREATMENT OF MDR-TB	500MG	ORAL		TREATMENT OF MDR-TB
60	M	46	TINNITUS				KANAMYCIN WAS SWITCH TO CAPROMYCIN	KANAMYCIN INJ	TREATMENT OF MDR-TB	750MG	IM		TREATMENT OF MDR-TB
31	F	43	HEARING LOSS				KANAMYCIN WAS SWITCH TO CAPROMYCIN	KANAMYCIN INJ	TREATMENT OF MDR-TB	500MG	IM		TREATMENT OF MDR-TB
45	F	31	HEARING LOSS				KANAMYCIN WAS SWITCH TO CAPROMYCIN	KANAMYCIN INJ	TREATMENT OF MDR-TB	500MG	IM		TREATMENT OF MDR-TB
50	F	40	HEARING LOSS				KANAMYCIN WAS SWITCH TO CAPROMYCIN	KANAMYCIN INJ	TREATMENT OF MDR-TB	500MG	IM		TREATMENT OF MDR-TB
14	M	32	DECOLORATION OF SKIN, RASHES ALL OVER HIS BODY				THE PATIENT WAS COUNSELLED, REASSURED, REHYDRATED	NAVIRAPINE	MGT OF HIV		ORAL		MGT OF HIV
45	F	31	HYPERKALAEMIA				POTASSIUM WAS ADMINISTERED	KANAMYCIN INJ	TREATMENT OF MDR-TB	750MG	IM		TREATMENT OF MDR-TB
38	F	59	HEARING LOSS				KANAMYCIN WAS SWITCHED TO CAPROMYCIN	KANAMYCIN	DR-TB TREATMENT	1G	IM	750MG,750MG,750MG,2G	DR-TB TREAMENT
50	F	54	NAUSEA, VOMITING				PATIENT WAS REASSURED	PROTHIONAMIDE	DR-TB TREATMENT	500MG	ORAL	750MG,750MG,300MG,1.5G	DR-TB TREATMENT
36	M	40	NAUSEA, VOMITTING, CHEST PAIN				PLESIL WAS ADMINISTER	PROTHIONAMIDE	TREATMENT OF MDR-TB	500MG	ORAL	750MG,500MG,500MG,1G	DT-TB TREAMENT
35	F	75	ABDOMINAL PAIN, NAUSEA , VOMITING				ORT WAS PRESCRIBED	PROTHIONAMIDE	TREATMENT OF DR-TB	750MG	ORAL	750MG,750MG,750MG,2G,2G	DR-TB TREATMENT
17	F	59	NAUSEA, VOMITING, ABDOMINAL PAIN				PLESIL WAS ADMINISTER ,ORT THE PATIENT WAS COUNSELLED AND REASSURED	PROTHIONAMIDE	DR-TB TREAMENTT	750MG	ORAL	1G,750MG , 750MG ,750MG,2G	DR-TB TREAMENT
32	M	64	GENERAL BODY WEAKNESS, NAUSEA AND VOMITING				DOLO META-B WAS PRESCRIBED	PYRAZINAMIDE	TREATMENT PF DR-TB	2G	ORAL	1G, 750MG ,750MG ,750MG	DR-TB TREAMENT
80	F	35	DIFFICULTY WALKING, GENERAL BODY WEAKNESS				DICLOFENAC,REHYDRATED AND REASSURED	PYRAZINAMIDE	TREATMENT OF DR-TB	1000MG	ORAL	500MG,250MG,500MG,750MG	TREATMENT OF DRTTB
42	M	70	GENERAL BODY PAIN				DICLOFENAC WAS PRESCRIBED TO RELIEF PAIN AND THE PATIENT WAS REASSURED	PYRAZINAMIDE	TREAMENT OF DR-TB	2.G	ORAL	1G,750MG,750MG,750MG	TREATMENT OF DR-TB
45	M	47	GENERAL BODY WEAKNESS , JOINT PAIN				DICLOFENAC,SIRDALUTE	PYRAZINAMIDE	TREATMENT OF DR-TB	1.5G	ORAL	750MG,750MG,500MG,500MG	DR-TB TREATMENT
50	M	51	GENERAL BODY WEAKNESS				DICLOFENAC 50MG , REASSURED	PYRAZINAMIDE	TREATMENT OF DR-TB	1.5G	ORAL	750MG,750MG,500MG,500MG	TREATMENT OF DR-TB
50	F	50	GENERAL BODY WEAKNESS				DICLOFENAC 50MG AND SHE WAS REASSURED	PYRAZINAMIDE	TREATMENT OF DR-TB	1.5G	ORAL	750MG,750MG,500MG,500MG	TREATMENT OF DR-TB
25	M	42	SEVERE HEADACHE, GENERAL BODY WEAKNESS				IBUPROFEN 400G, HE WA REASSURED	PYRAZINAMIDE	TREATMENT OF DR-TB	1.5G	ORAL	750MG,500MG,500MG	TREATMENT OF DR-TB
30	M	50	SEVERE HEADACHE, GENERAL BODY WEAKNESS				HE WAS REASSURED AND PCM WAS PRESCRIBED FOR 3DAYS	PYRAZINAMIDE	DR-TB TREATMENT	1.5G	ORAL	750MG,500MG,500MG	DR-TB TREATMENT
36	M	43	SEVERE BODY WEAKNESS, JOINT PAIN				IBUPROFEN 400MG BD FOR 3DAYS, HE WAS REASSURED	PYRAZINAMIDE	TREATMENT OF DR-TB	1.5G	ORAL	750MG,750MG,500MG,500MG	TREATMENT OF DR-TB
17	F	59	DIZZINESS, SEVERE HEADACHE				PARACETAMOL WAS PRESCRIBED	CYCLOSERINE	DR-TB TREATMENT	750MG	ORAL	1G,750MG,2.G,750MG	TREATMENT OF DR-TB
38	F	59	DEAFNESS				AFTER INJECTION WAS SUSPENDED ,HYDROCORTISONE 200MG	CAPROMYCIN	DR-TB TREATMENT	500MG	IM	750MG,750MG,500MG,2G	TREATMENT OF DR-TB
39	M	47	HYPOKALAEMIA				KCL IV AND LATER ORAL	CAPROMYCIN	DR-TB TREATMENT	750MG	IM	750MG,500MG,500MG,1.5G	TREATMENT OF DR-TB
38	F	99	SEVERE VOMITTING, RESTLESSNESS, SWEATING	Recovered fully	No	No	DRUG WAS STOPPED AND FLUID WERE ENCOURAGE	DIDOFERA SODIUM	POST OPERATIVE	750MG	IM
31	F	100	VOMITTING, DIZZINESS, GENERAL BODY WEAKNESS	Recovered fully	No	No		PLATAZOCINE	POST EXPOSURE PROPHYLAXIS	600MG	INJECTION		POST OPERATIVE DRUGS
27	F	50	RASH ALL OVER BODY, COUGH, FEVER, BODY WEAKNESS	Life Threatening	Yes	No		CO-TRIMOXAZOLE	CTX	480MG	ORAL		HIV
27	F	58	PHERIPHERAL NEUROPATHY		No			LAMIVUDINE	MGT OF HIV	300MG	ORAL
25	F	37	DIZZINESS	Recovered fully	No			EFV	HIV-INFECTION	600/300/300	ORAL		HIV PROPHYLAXIS
28	M		BODY RASH, PRURITIS		No			EFV	HIV	600MG	ORAL		RX OF HIV
48	M	71	INSOMNIA		No			EFV				300MG
31	M	53	DIZZINESS, GENERAL BODY PAIN		No			EFV	RX OF HIV	600MG	ORAL		RX OF HIV
30	F	48	FEVER, DIZZINESS, ABD PAIN		No				RX OF HIV	150MG	ORAL
30	M	50	ABD PAIN		No			TENOFOVIR	HIV-INFECTION	300MG	ORAL		PROPHYLAXIS
28	F	38	DIZZINESS, COUGH		No			TENOFOVIR	HIV/AIDS	300MG	ORAL		RX OF HIV
37	M	45	IRRATIONAL SPEECH AND BEHAVIOUR	Recovered fully	Yes		COMBEMOZIPINE, FOLIC ACID	EFV	RX OF HIV	600MG	ORAL		RX OF HIV
25	F	43	DIZZINESS, POOR APPETITE		No			EFV	RX OF HIV	600MG	ORAL		RX OF HIV
35	F	49	PAINS UNDER THE BREAST	Other	No		TRAMADOL 50MG	EFV/LAMIVUDINE/TENOFOVIR	ART	600/300/300	ORAL	960MG	ANTIBIOTIC FOR O I
50	F	51	EXCESSIVE WEATING, HYPERTHERMIA, DIARRHOEA, BODY WEAKNESS, ANAEMIA	Recovered fully	Yes		DRUGS STOPPED AND CHANGED TO COMBIPAK	EFV/LAMI	ART	600/300/300	ORAL	960	ANTIBIOTIC
33	F	80	JOINT PAINS, NO APPETITE, NAUSEA, VOMITTING	Recovered fully	No			EFV/3TC/TDF	ART	600/300/300	ORAL	960MG	ANTIBIOTIC
32	F	75	PERSISTENT DRY COUGH AND GENERAL BODY WEAKNESS	Recovered fully	No		COUGH EXPECTORANT, HAEMETIMICS, ANALGESIC ADMINISTERED	EFV/LAMIVUDINE/TENOFOVIR	ART	600/300/300	ORAL	1G B.D	COUGH EXPECTORANT, ANALGESIC
21	F	58	DYPSNIA, VERY WEAK, HEAVY, UNSTABLE BREATHING	Recovered fully	No		ASCOREX WAS STOPPED	SALBUTAMOL BROMREX	COUGH ADJ		ORAL	960MG	ANTIBIOTIC
34	F		BOILS OVER DIFFERENT PARTS OF THE BODY, PRURITIS	Recovered fully	No		ANTIHISTAMINES AND AMOXYCILLIN PRESCRIPED	EFV/LAM/TENOFOVIR	ART	600/300/300	ORAL
49	M	66	HEADACHE, DIZZINESS, ANAEMIA	Recovered fully	No	No	HAEMATRICS CONTAINING FERONS804, PCM, VIT BCO	EFV/LAMIVUDINE/TENOFOVIR	ART	600/300/300	ORAL	960MG	OIS IN ART
36	F	65	RASHES, PRURITIS	Recovered fully	No	No	ANTIHISATAMIN, ANTICEPTIC SOAP (DISULFIRAM)	LAMIVUDINE/NVP/ ZDV	ART	150/200/300	ORAL	960MG	OIS
30	F	89	DYPSNIA, HOTNESS OF THE BODY, EXCESSIVE SWEATING, TIREDNESS	Other	No	No	HAEMATRICS, MULTIVITAMINES, ACTION MEAL (GOOD DIET CONTAINING FOLIC ACID)	LAMIVUDINE/NVP/ ZDV	ART	1 BD	ORAL	960MG	OPPOR. INF (ANTIBIOTIC)
33	F		INSOMNIA, SOMNOLENCE, CRAMPS, SLIGHT HEAVINESS IN THE HEAD	Recovered fully	No		ADMINISTRATION OF CALCIUM TABLETS, VITAMIN BCOMPLEX	EFV/LAM/TENOFOVIR	ART	600/300/300	ORAL	960MG	ANTIBIOTICS FOR O.IS
31	F	50	DIZZINESS, HEADACHE, LIGHT HEADEDNESS	Recovered fully	No	No	PCM TABS, MULTIVITAMINS AND FERMS TABS	EFV/LAM/TENOFOVIR	ART	600/300/300	ORAL	960MG	OI ANTIBIOTICS
28	F	73	GENERAL BODY PRURITIS, RASHES	Other	No		ADVISED TO STOPPED TAKING CTX	CO-TRIMOXAZOLE	O I PROPHYLAXIS	960MG	ORAL		MGT OF HIV
32	M	61	STRANGE DREAMS, RESTLESSNESS	Recovered fully				EFV	MGT OF HIV	600MG	ORAL		OI PROPHYLAXIS, MGT OF HIV
35	F	55	DIZZINESS, STRANGE DREAMS	Other	No		PATIENT IS BEING REASSURED ON THE SITE EFFECTS	EFV/3TC/TDF	MGT OF HIV	600MG	ORAL		OI PROPHYLAXIS, MGT OF HIV
32	M	61	PRURITIS (INTENSE)		No		ADVISED TO STOP TAKING SEPTRIN	CTX	O I PROPHYLAXIS	960MG	ORAL		MGT OF HIV
30	F	56	SEVERE VOMITTING	Recovered fully	No		ADVISED TO STOP TAKING SEPTRIN	CTX	O I PROPHYLAXIS	960MG	ORAL		MGT OF HIV
45	F	42	PRURITIS (INTENSE), BOILS, DARKENING OF THE SKIN	Other	No		COTRIMOXAZOLE WAS SUSPENDED	CTX	O I PROPHYLAXIS	960MG	ORAL		MGT OF HIV
61	M	55	STIFFNESS OF ABDOMEN, HOTNESS OF THE STOMACH, JOINT PAIN	Other	No		ADVICE PATIENT TO TAKE DRUG WITH FULL STOMACH	NEUROVITE	PX OF CHOLECYSTITIS	1 CAPS	ORAL		PX OF CHOLECYCTITIS
49	M	77	BOILS ALL OVER THE BODY, ITCHING	Recovered fully	No	No	ASKED TO STOPPED THE SEPTRIN	CTX	O I PROPHYLAXIS	960MG	ORAL		MGT OF HIV
50	M	75	DROWSINESS	Recovered fully	No		PATIENT REASSURED	EFV/3TC/TDF	MGT OF HIV	600MG	ORAL		OI PROPHYLAXIS, MGT OF HIV
51	F	93	DIZZINESS , SOMNOLENCE	Other	No		PATIENT WAS REASSURED ON THE SIDE EFFECTS OF THE DRUGS	EFV/3TC/TDF	MGT OF HIV	600MG	ORAL		OI PROPHYLAXIS, MGT OF HIV
20	F	40	HIGH BODY TEMPERATURE, PROFUSE SWEATING, SEVERE HEADACHE	Other	No		INJ PRONETHAZINE 25MG START	BLOOD CRH	PX OF ANAEMIA	450MLS	INTRAVENOUS		PX OF ANAEMIA
55	F	62	ITCHING, PRURITIS, BOILS	Other	No	No	SEPTRIN WAS IMMEDIATELY DISCONTINUED	CTX	O I PROPHYLAXIS	960MG	ORAL		MGT OF HIV
57	F	59	STRANGE DREAMS	Other	No	No	PATIENT EDUCATED ON THE SIDE EFFECT OF THE DRUG	EFV	MGT OF HIV	600MG	ORAL		OI PROPHYLAXIS, MGT OF HIV
45	M	62	STRANGE DREAMS, DROWSINESS, ABDOMINAL PAIN		No		PATIENT WAS REASSURED	EFV	MGT OF HIV	600MG	ORAL		OI PROPHYLAXIS, MGT OF HIV
56	M	59	DIZZINESS, NIGHTMARES	Recovered fully	No		REASSURED	EFV	MGT OF HIV	600MG	ORAL		OI PROPHYLAXIS, MGT OF HIV
38	F	59	DIZZZINESS	Recovered fully	No		PATIENT REASSURED	EFV	MGT OF HIV	600MG	ORAL		OI PROPHYLAXIS, MGT OF HIV
48	M	60	PROFUSED SWEATING, DIZZINESS, NIGHTMARES	Recovered fully	No		PATIENT REASSURED	EFV	MGT OF HIV	600MG	ORAL		OI PROPHYLAXIS, MGT OF HIV
		73	DIZZINESS	Recovered fully	No		PATIENT WAS REASSURED ON THE SIDE EFFECTS OF THE DRUGS	EFV	MGT OF HIV	600MG	ORAL		MGT OF HIV
38	F	70	CEASATION OF BREAST MILK FLOW	Recovered fully	No			CTX	O I PROPHYLAXIS	960MG	ORAL		MGT OF HIV
38	F	65	BOILS AROUND THE FACE, HANDS AND LIPS, PRURITUS	Recovered fully	No		SEPTRIN WAS IMMEDIATELY DISCONTINUED	CTX	O I PROPHYLAXIS	960MG	ORAL		MGT OF HIV
59	M	57	DARK PARCHES OF THE SKIN	Recovered fully	No		SEPTRIN WAS IMMEDIATELY DISCONTINUED	CTX	O I PROPHYLAXIS		ORAL		MGT OF HIV
27	F	50	DIZZINESS	Recovered fully	No		PATIENT WAS REASSURED ON THE SIDE EFFECTS OF THE DRUGS	EFV	MGT OF HIV	600MG	ORAL		MGT OF HIV
32	M	55	PRURITIS, SMALL RASHES ALL OVER THE SKIN	Recovered fully	No		SEPTRIN WAS IMMEDIATELY DISCONTINUED	CTX	O I PROPHYLAXIS	960MG	ORAL		MGT OF HIV
25	F		NIGHTMARES, DROWSINESS, SEVERE HEADACHE	Other	No		PATIENT WAS REASSURED ON THE SIDE EFFECTS OF THE DRUGS	EFV	MGT OF HIV		ORAL		OI PROPHYLAXIS, MGT OF HIV
25	F	50	NIGHTMARES, HEADACHE, DIZZINESS, ABDOMINAL PAIN	Recovered fully	No		PATIENT WAS REASSURED ON THE SIDE EFFECTS OF THE DRUGS	EFV	MGT OF HIV	600MG	ORAL		OI PROPHYLAXIS, MGT OF HIV
36			RASHES ALL OVER THE BODY, PRURITIS	Recovered fully				CTX	O I PROPHYLAXIS	960MG	ORAL		MGT OF HIV
44	M	58	SKIN RASHES, PRURITIS	Recovered fully	No		SEPTRIN WAS IMMEDIATELY DISCONTINUED	CTX	O I PROPHYLAXIS	960MG	ORAL		MGT OF HIV
56	F	71	DARK PATCHES AROUND THE EYES	Other	No		PATIENT REASSURED	NVP	MGT OF HIV	200MG	ORAL		MGT OF HIV
55	F	96	DIZZINESS, PROFUSED SWEAT8ING	Recovered fully	No	No	PATIENT IS REASSURED ON THE SIDE EFFECTS OF THE DRUGS	EFAVIRENZ	MGT OF HIV	600MG	ORAL	960MG,300MG,300MG	O.I PROPHYLAXIS,MGT OF HIV,MGT OF HIV
42	F	42	NIGHTMARES		No	No		EFV/3TC/TDF	HIV		ORAL	960MG	CPT
11	M	17	NAUSEA,VOMITTING,DIARRHOEA, DRY MOUTH	Other	No	No	ORS, MULTIVITAMIN	3TC, TDF, EFV	HIV		ORAL	480MG
35	F	50	FATIGUE, MUSCLE PAIN, DIZZINESS		No	No		EFV/3TC/TDF	HIV/AIDS	1 AT NIGHT	ORAL	960MG	CPT
38	F	55	NIGHTMARES, DIZZINESS, IRRATIONAL BEHAVIOUR	Recovered fully	No	No		EFV/3TC/TDF	HIV/AIDS		ORAL	960MG	CPT
42	F	60	LOSS OF APPETITE, DIZZINESS, FATIGUE		No	No		EFV/3TC/TDF	HIV	1 TAB DAILY	ORAL	960MG	CPT
39	M		DIZZINESS, HEADACHE, NIGHT MARES, TINGLING SENSATION ON THE FEET		No	No		TDF/3TC/EFV	HIV/AIDS	1 AT NIGHT	ORAL	960MG	HIV PROPHYLAXIS
35	M	63	INTERNAL HEAT, DIZZINESS, FATIGUE, BLURRED VISION	Other	No	No		TDF/3TC/EFV	PEP HIV	1 AT NIGHT	ORAL		HEPATITIC
32	F		NAUSEA,VOMITTING, HEADACHE		No	No	TABS PARATHEGIC AND ANALGESTIC	AZT/3TC/NVP	HIV/AIDS	1 BD	ORAL	960MG	OI PROPHYLAXIS, MGT OF HIV
28	F		FATIGUE, DEPRESSION, ATHRALGIA, DIZZINESS		No	No	TABS SETRIN, TABS DICLOFENAC	TDF/3TC/EFV	HIV/AIDS		ORAL
20	F	23	PEDAL EDEMA, FATIGUE	Other	No	No		TDF/3TC/EFV	HIV	1 AT NIGHT	ORAL		HIV
28	F	60	NAUSEA,VOMITTING, DIZZINESS, HEADACHE, BACK PAIN	Other	No	No		EFV/3TC/TDF	HIV	1 AT NIGHT	ORAL	960MG	OI PROPHYLAXIS, MGT OF HIV
42	F	47	NIGHTMARES		No	No		EFV/3TC/TDF	HIV	1 AT NIGHT	ORAL	960MG	CPT
25	F		FATIGUE, GENERALISED WEAKNESS, DIZZINESS		No	No		TDF/3TC/EFV	HIV/AIDS	1 AT NIGHT	ORAL
38	M	61	FATIGUE, WEAKNESS, LETHARGY, NIGHTMARES, OCCESSIONAL HEADACHES		No	No	PSYCHOTHERAPY, PATIENT COUNSELLED AND ASSURANCE	TDF/3TC/EFV	HIV	1 AT NIGHT	ORAL	960MG
44	F	58	DIZZINESS, NIGHTMARES, DYSPEPSIA, HEADACHE AND VISUAL DISTURBANCES	Other	No	No		TDF/3TC/EFV	HIV	1 AT NIGHT	ORAL	960MG	CPT
22	F	43	HEADACHE, DIZZINESS, PALPITATION, INSOMNIA, DRY MOUTH		No	No		TDF/3TC/EFV	HIV/AIDS	1 TAB DAILY	ORAL	960MG	CPT
36	F	77	PALPITATION, HEADACHE		No	No		TDF/3TC/EFV	HIV	1 TAB DAILY	ORAL	960MG	CPT
32	F	50	DIZZINESS, PRURITIC RASH, NIGHTMARES		No	No		TDF/3TC/EFV	HIV	1 TAB DAILY	ORAL	960MG	CPT
27	F	65	HEADACHE, DIZZINESS, FATIGUE		No	No		TDF/3TC/EFV	HIV	1 TAB DAILY	ORAL	960MG	CPT
20	F	50	PALPITATION, DIZZINESS, MUSCLE PAIN, FATIGUE		No	No		TDF/3TC/EFV	HIV	1 TAB DAILY	ORAL	960MG	CPT
30	M	62	VOMITTING, DIZZINESS, WEAKNESS, ABDOMINAL CRAMB		No	No	ORS INJ	TDF/3TC/EFV	HIV/AIDS	960MG	ORAL	960MG	CPT
36	F	53	DIZZINESS, WEAKNESS, NIGHTMARES, ABDOMINAL CRAMBS		No	No		TDF/3TC/EFV	HIV/AIDS	1 TAB DAILY	ORAL	960MG	CPT
25	F	45	DEPRESSION, DIZZINESS, FATIGUE, PRURITIC RASH		No	No		TDF/3TC/EFV	HIV	1 TAB DAILY	ORAL	960MG	CPT
1	F	9	PRURITIC RASHES		No	No		3TC, TDF, EFV	HIV	1 TAB DAILY	ORAL	120MG	CPT
35	F	61	NIGHTMARES, DIZZINESS, FATIGUE, LOSS OF CONSCIOUSNESS	Recovered fully	Yes	No	WITHDRAWAL OF THE DRUGS	TDF/3TC/EFV	HIV/AIDS	960MG	ORAL	960MG	CPT
50	F		PRURITIC RASH		No	No		TDF/3TC/EFV	HIV/AIDS	1 TAB DAILY	ORAL	960MG	CPT
45	M	65	POLYURIA		No	No		TDF/3TC/EFV	HIV	1 TAB DAILY	ORAL	960MG	CPT
35	M	53	NIGHTMARES, DIZZINESS, FATIGUE		No	No		TDF/3TC/EFV	HIV	1 TAB DAILY	ORAL	960MG	CPT
26	F	52	NIGHTMARES, DIZZINESS, FATIGUE, MALAISE, PRURITIUS		No	No		TDF/3TC/EFV	HIV	1 TAB DAILY	ORAL	960MG	CPT
35	F	47	PRURITIC RASH		No	No		3TC, TDF, EFV	HIV	1 TAB DAILY	ORAL	960MG	CPT
21	F	53	DIZZINESS, GENERAL BODY WEAKNESS		No	No		TDF/3TC/EFV	HIV	1 TAB DAILY	ORAL	960MG	CPT
20	F	59	DIZZINESS, PRURITIC RASH					TDF/3TC/EFV	HIV/AIDS	1 TAB DAILY	ORAL	960MG	CPT
44	F	53	SKIN RASH, PRURITUS, HYPERPIGMENTATION		No	No		TDF/3TC/EFV	HIV/AIDS	1 TAB DAILY	ORAL	960MG	CPT
1	F	11	SKIN RASH, PRURITUS, HYPERPIGMENTATION		No	No		3TC, TDF, EFV	HIV	1 TAB DAILY	ORAL
36	M	67	DIZZINESS, NIGHTMARES, FATIGUE		No	No		TDF/3TC/EFV	HIV	1 TAB DAILY	ORAL	960MG	CTX PREVENTION
31	F		PRURITIC RASHES ALL OVER HER BODY	Other	No			LAMIVUDINE/NVP/ ZDV	ANTIRETROVIRAL THERAPY		P O
	M	6.57	PROLONGED FACIAL RASH	Recovered fully	No		LORATIDINE TABS, CREAM MEPTRAMIN	AMPICLOX	SEPSIS	125/120MG	ORAL
34	F		RASHES ALL OVER THE BODY, PRURITIS	Recovered fully	No		TAB LORATADINE 10MG DAILY	CTX	O I PROPHYLAXIS	960MG	P O
40	F		DIZZINESS, LIGHT HEADEDNESS				SWITCH TO TDF/3TC/EFV	TDF/3TC/EFV	ANTIRETROVIRAL THERAPY	T NOCTE	P O	960MG	PROPHYLAXIS
42	F	52	PRURITIS UNDERNEATH THE FEET AND PALMS		No		LORATIDINE TABS SELF MEDICATION	TDF/3TC/EFV	ARV PROPHYLASIS	1 TAB DAILY	P O	960MG	OI PROPHYLAXIS, MGT OF HIV
31	F	57	HEARTBURN, DIZZINESS		No		ANTACIDS/BRAND CHANGED TO HETERO	3TC, TDF, EFV	ARV PROPHYLASIS	T B.D	P O	960MG	OI PROPHYLAXIS, MGT OF HIV
50	F	54	PRURITIS, SKIN RASHES		No		LORATIDINE TABS	CTX	O I PROPHYLAXIS	960MG	P O		ARV
46	F	59	PRURTIS AND RASHES ON THE SKIN				LORATIDINE TABS	CTX	O I PROPHYLAXIS	960MG	P O	1TAB	ARV
24	F		NAUSEA, DIZZINESS		No		CHANGE BRAND (HETERO)	3TC, TDF, EFV	ARV PROPHYLASIS	T B.D	P O	960MG	OI PROPHYLAXIS, MGT OF HIV
22	F		SEVERE PRURITIS		No		DRUG WITHDRAWN	CTX	O I PROPHYLAXIS	960MG	P O	960MG	ARV
40	F		PRURITIS, BLACK PATCHES ON THE LEGS		No		DRUG WITHDRAWN	CTX	PROPHYLAXIS	960MG	P O		ARV
45	M		SEVERE HEART BURN AND SWEATING				SUSPEND EMTRISIL AND CAP RABEPRAZOLE	GLIMEPRICE	TYPE II DIABATES	T OD	P O
18	F		BREATHING FAST, ABDOMINAL DISCOMFORT, EPIGASTRI PAIN				MILK( HOME REMEDY)	FESO4/FOLIC ACID	HEAMATINIC	T OD	P O
32	M	61	INTERMITTEN ITCHING,				TAB LORATADINE	LIVOLIN FORT	HEPATITIS		P O
35	M		HYPERPIGMENTATION OF PALM, NAILS AND FEET		No		REGIMEN CHANGE TO TDF/3TC/EFV	3TC, TDF, EFV	ANTIRETROVIRAL THERAPY	T B.D	P O	960MG	OI PROPHYLAXIS, MGT OF HIV
68	F		DRY COUGH, CHEST PAIN		No	No	KOFAREST	LINISOPRIL	HTN		P O		HTN, DIABETES
35	F		LOWER ABDOMINAL CRAMPS		No		PREFERS ANOTHER BRAND	3TC, NEV, AZT	ANTIRETROVIRAL THERAPY	1 TAB DAILY	P O		PROPHYLAXIS
40	F	60	STOOLING, VOMITTING, EPIGASTRIC PAIN	Other			TAB OMMEPRAZOLE, TAB FLAGYL	ZDV	HIV/AIDS		ORAL	960MG	PROPHYLAXIS
48	M	63	LEFT EAR BLOCKAGE, HEARING LOSS	Other	No			LOPINAVIR	HIV/AIDS		ORAL		HIV
27	F	55	AMENORRHEA	Recovered fully	No			ZDV	HIV/AIDS		ORAL	960MG	PROPHYLAXIS
6	F	21	EYE DISCHARGE, SWOLLEN, RED, SENSITIVE TO LIGHT, PRURITIS	Other	No		CAPVITAT	ZDV	HIV/AIDS		ORAL		PROPHYLAXIS
42	M	64	COUGH, POOR SLEEP	Other	No		CAP AMOXIL, TAB LEXOTAN	TENOFOVIR	HIV/AIDS		ORAL	960MG	PROPHYLAXIS
45	M	68	POOR SLEEP	Other	No			TENOFOVIR	HIV/AIDS		ORAL	960MG	OI PROPHYLAXIS, MGT OF HIV
34	F	63	GENERALISED RASH		No	No	TOPICAL MACDEM, TAB PISITON	EFV	HIV/AIDS	600/300/300	ORAL	960MG	CPT
67	F	61	DIZZINESS, SHAKING, DROWSINESS, HEADACHE, CONSTIPATION FOR THREE DAYS, VOMITTING	Recovered fully	No			PREGABALINE	CHRONIC PAINS NEUROPATHY	T B.D	ORAL
60	F	50	ANAL SORES, BUCCAL SORES	Recovered fully	No		TAB LORATADINE, VIT C	TENOFOVIR	HIV/AIDS	600/300/300	ORAL	960MG	OI PROPHYLAXIS, MGT OF HIV
45	F	58	CONJUCTIVITIS, LEG STIFFNESS	Recovered fully	No	No	EYE DROP	EFV/3TC/TDF	HIV/AIDS	600/300/300	ORAL	960MG	IPT
49	F	63	CONTINOUS SMELLY FART, FLATULENCE	Other	No			ISOMNIZED TAB	IPT	600/300/300	ORAL		HIV
40	M	61	GENERAL RASHES OF THE BODY, ITCHING	Other	No		TAB LORATADINE 10MG DAILY	CTX	PROPHYLAXIS	960MG	ORAL		HIV
40	M	69	SEVERE PRURITIS	Other	No	No		3TC, NEV, AZT	HIV/AIDS		ORAL	960MG	CPT
38	M	56	RASHES, PRURITIS	Recovered fully	No		TAB LORATADINE 10MG DAILY	TENOFOVIR	HIV/AIDS		ORAL	960MG	PROPHYLAXIS
29	F	45	NAUSEA, STOMACH DISTURBANCES, DIZZINESS, LOSS OF APPETITE	Recovered fully	No		PATIENT SWITCHED OVER TO AMOXIL	CIPROFLOXACIN	TYPHOID	500MG	ORAL		TYPHOID, MALARIA
61	F	68	PRURITIS	Other	No		TAB LORATADINE 10MG DAILY	CTX	PROPHYLAXIS	960MG	ORAL		HIV
54	F	50	DIZZINESS, FALLING DOWN, FEELING OF STOMACH EMPTINESS, COUGH	Recovered fully	No			TENOVIR/LAM(EFV)	HIV/AIDS		ORAL	960MG	PROPHYLAXIS
50	M	36	JOIN PAIN, FEVER, LOSS OF TASTE, LOSS OF APPETITE, PENILE ULCER, DRYNESS OF LIPS	Other	No		TAB LORATADINE 10MG DAILY	TENOFOVIR	HIV/AIDS		ORAL	960MG	PROPHYLAXIS
65	F	59	INSOMNIA, FREQUENT URINATION	Recovered fully	No			MULTIVITAMINS	ANOREXIA	1 TAB DAILY	ORAL	500MG	DIABETES
43	M	61	INSOMNIA, COUGH	Other	No		TAB DIAZEPAM	TENOFOVIR	HIV/AIDS	600/300/300	ORAL	960MG	OI PROPHYLAXIS, MGT OF HIV
62	F	70	POOR SLEEP	Other	No		TAB LEXOTAN 3MG	MODIU	HYPERTENSION	1 TAB DAILY	ORAL		HYPERTENSION, MALARIA, PAINS
35	F	50	SEVERE DIZZINESS	Recovered fully	No			EFV/3TC/TDF	HIV/AIDS	600/300/300	ORAL	960MG	IPT
40	F	56	LEG PAIN	Recovered fully	No		TAB CO-CODAMOL	TENOFOVIR	HIV/AIDS	600/300/300	ORAL	960MG	PROPHYLAXIS
44	F	68	HEADACHE, DIZZINESS, LOSS OF APPETITE, VOMITTING, LOSS OF WEIGHT, LOW CD4+	Other	No			TENOFOVIR	HIV/AIDS		ORAL
42	F	62		Other	No		CAP VITAVITE T	TENOFOVIR	HIV/AIDS	600/300/300	ORAL	960MG	PROPHYLAXIS
21	F	45	VOMITTING, DIZZINESS, TIREDNESS, DROWSINESS, LOSS OF APPETITE	Recovered fully	No			TRAMADOL	BACK PAIN	500MG	ORAL		MALARIA, PAINS
35	F		PRURITIS, SKIN RASH	Other			TAB LORATADINE 10MG	ARTHI 20MG/LUME	ANTI MALARIA	BD	PO	1GTD	ANALGESIC
55	F	56.5	CONSTIPATION	Other	No	No	LIQUID PARAFFIN	LEVOFLOXACIN	MDRTB	750MG	ORAL		MDR-TB THERAPY
40	M	49	BODY RASH, ITCHING	Recovered fully	No	No	HYDROCORTISON INJECTION	CYCLOSERINE	MDRTB	500MG	ORAL		MDR-TB THERAPY
37	M	60	BILATERAL KNEE PAINS	Other	No	No	DICLOFENAC TABLET	PYRAZINAMIDE	MDRTB		ORAL		MDR-TB THERAPY
53	M	43	LOWER BACK PAIN	Other	No	No	DICLOFENAC TABLET	PYRAZINAMIDE	MDRTB		ORAL		MDR-TB THERAPY
40	M	48.5	PALPITATIONS	Recovered fully	No	No		LEVOFLOXACIN	MDRTB	750MG	ORAL		MDR-TB THERAPY
53	M	42	POOR APPETITE	Recovered fully	No	No	MULTIVITAMIN TAB	LEVOFLOXACIN	MDRTB	750MG	ORAL		MDR-TB THERAPY
38	M	51.5	JOINT PAINS	Other	No	No	DICLOFENAC TABLET	PYRAZINAMIDE	MDRTB	2G DAILY	ORAL		MDR-TB THERAPY
23	F	53	RIGHT KNEE PAINS, RIGHT ANKLE PAINS	Other	No	No		PYRAZINAMIDE	MDRTB	2G DAILY	ORAL		MDR-TB THERAPY
45	M	55	JOINT PAINS, KNEES, ANKLE	Other	No	No	DICLOFENAC TABLET	PYRAZINAMIDE	MDRTB	2G DAILY	ORAL		MDR-TB THERAPY
35	M	52.5	GENERALISED BODY WEAKNESS, ANAEMIA	Recovered fully	No	No	BLOOD TRANSFUSION,	CYCLOSERINE	MDRTB		ORAL		MDR-TB THERAPY
57	F	67	JOINT PAINS	Other	No	No	PCM, DICLOFENAC	PYRAZINAMIDE	MDRTB	2G DAILY	ORAL		MDR-TB THERAPY
45	M	51.5	HEADACHE, BODY PAINS	Recovered fully	No	No	PCM TAB	CYCLOSERINE	MDRTB	750MG	ORAL		MDR-TB THERAPY
52	M	59	NAUSEA,LOSS OF APETITE	Other	No	No	PLASIL TAB AND MULTIVITAMIN TAB	LEVOFLOXACIN	MDRTB	750MG	ORAL		MDR-TB THERAPY
40	M	60	HEARING LOSS, RINGING SENSATION OF THE RIGHT EAR, MODERATE SERSORY NEURAL HEARING LOSS	Other	No	No	DRUG WITHDRAWN	KANAMYCIN INJ	MDRTB	750MG	INTRAMUSCULAR (IM)		MDR-TB THERAPY
	M	54	HEARING LOSS ON BOTH EARS	Other	No	No	CONVERSION FROM KANAMYCIN TO CAPREOMYCIN	KANAMYCIN INJ	MDRTB	750MG	INTRAMUSCULAR (IM)		MDR-TB THERAPY
38	M	50	RINGING SENSATION WITHIN THE MIDDLE PART OF BOTH EARS	Recovered fully	No	No	DRUGS CONVERTED TO CAPREOMYCIN	KANAMYCIN INJ	MULTI-DRUG	750MG	INTRAMUSCULAR (IM)		MDR-TB THERAPY
55	F	51	VOMITING, ABDOMINAL PAIN, OCCASIONAL CONSTIPATION	Other	No	No	INJECTION PLASIL 10MG	CYCLOSERINE	MDRTB	500MG	ORAL		MDR-TB THERAPY
55	F	50	DYPSNOEA	Recovered fully	No	No	PROPRANDOL TAB, AND SPIROUSLACTONE TAB	LEVOFLOXACIN	MDRTB	750MG	ORAL		MDR-TB THERAPY
31	M	46.5	LOSS OF APPETITE, VOMITING	Recovered fully	No	No	MULTIVITAMIN TAB	LEVOFLOXACIN	MDRTB	750MG	ORAL		MDR-TB THERAPY
37	F	53	POOR APETITE, GENERALISED BODY WEAKNESS	Recovered fully	No	No	MULTIVITAMIN TAB	LEVOFLOXACIN	MDRTB	750MG	ORAL		MDR-TB THERAPY
40	F	56.5	YELLOWISH EYES, INSOMNIA	Other	No	No	DRUG WITHDRAWN	PYRAZINAMIDE	MDRTB	2G DAILY	ORAL		MDR-TB THERAPY
57	F	62.5	JOINT PAINS	Recovered fully	No	No	MESOCHLORPRAMIDE INJ	PYRAZINAMIDE	MDRTB	2G	ORAL		MDR-TB THERAPY
45	M	55	INCREASED BOWEL MOVEMENT	Recovered fully	No	No	ORS	LEVOFLOXACIN	MDRTB	750MG	ORAL		MDR-TB THERAPY
33	M	44	ITCHING ON THE EYES, EXCESSIVE TEARING	Recovered fully	No	No	LORATIDINE AND CHITERAPHENICAL EYE	PROTHONAMIDE	MDRTB	500MG	ORAL		MDR-TB THERAPY
28	M	58	GENERALISED PRURITIS, PAINS ON BOTH TOES WITH BLEEDING FROM THE EDGES	Other	No	No	VIT C AND LORATIDINE	CYCLOSERINE	MDRTB		ORAL		MDR-TB THERAPY
55	F	50	DIZZINESS, BLEEDING	Death	No	No	MULTIVITE	CYCLOSERINE	MDRTB	500MG	ORAL		MDR-TB THERAPY
40	M	44	GENERALISED BODY WEAKNESS		Yes	No	MULTIVITAMIN TAB	LEVOFLOXACIN	MDRTB		ORAL		MDR-TB THERAPY
45	M	45.5	HEADACHE	Recovered fully	No	No	PCM	CYCLOSERINE	MDRTB	500MG	ORAL		MDR-TB THERAPY
53	M	45	SEVERE WAIST PAIN	Recovered fully	No	No	IBUPROFEN TAB	PYRAZINAMIDE	MDRTB	160MG	2016-07-07		MDR-TB THERAPY
23	M	50	CHEST PAIN, RADIATION TO THE BACK	Other	No	No		LEVOFLOXACIN	MDRTB		ORAL		MDR-TB THERAPY
45	M	45.5	CHEST PAIN, RADIATION TO THE BACK	Recovered fully	No	No	GESTIDE SUSPENSION	LEVOFLOXACIN	MDRTB	750MG	ORAL		MDR-TB THERAPY
41	M	48.5	TINNITUS	Other	No	No	CHANGE KANAMYCIN TO CAPREOMYCIN	KANAMYCIN INJ	MDRTB	750MG	INTRAMUSCULAR (IM)		MDR-TB THERAPY
53	M	45	HEARING LOSS	Other	No	No	ADEQUATE REHYDRATION	KANAMYCIN INJ	MDRTB	750MG	INTRAMUSCULAR (IM)		MDR-TB THERAPY
52	M	56	TINNITUS	Recovered fully	No	No	ADEQUATE REHYDRATION	KANAMYCIN INJ	MDRTB	1G DAILY	INTRAMUSCULAR (IM)		MDR-TB THERAPY
23	F	50	SKIN PEELING AT INJECTION SITE	Recovered fully	No	No	RE-ASSURANCE AND PCM TAB	KANAMYCIN INJ	MDRTB	750MG	INTRAMUSCULAR (IM)		MDR-TB THERAPY
57	F	62.5	PAINS AT THE INJECTION SITE	Recovered fully	No	No	PCM	KANAMYCIN INJ	MDRTB	1 TAB DAILY	INTRAMUSCULAR (IM)		MDR-TB THERAPY
53	M	45	PAINS AT THE INJECTION SITE	Recovered fully	No	No	REASSURANCE AND IBUPROFEN TAB	KANAMYCIN INJ	MDRTB	750MG	INTRAMUSCULAR (IM)		MDR-TB THERAPY
45	M	45.5	FAST HEART BEAT	Recovered fully	No	No	PROPRANDOL TAB, AND REASSURANCE	LEVOFLOXACIN	MDRTB	750MG	ORAL		MDR-TB THERAPY
40	M	49	CHEST PAIN, LEG SWELLING, TACHYCARDIA	Other	No	No	PROPRANDOL TAB, AND REASSURANCE	LEVOFLOXACIN	MDRTB		ORAL		MDR-TB THERAPY
40	M	49	TINNITUS	Recovered fully	No	No	REASSURANCE AND PROPER HYDRATION	KANAMYCIN INJ	MDRTB		INTRAMUSCULAR (IM)		MDR-TB THERAPY
55	F	50	EPIGASTRIC PAIN	Recovered fully	No	No	OMEPRAZOLE CAPS	LEVOFLOXACIN	MDRTB	750MG	ORAL		MDR-TB THERAPY
26	F	34	VAGINAL ITCHING	Recovered fully	No	No	CLOTRIMAZOLE AND PIRITON TAB	LEVOFLOXACIN	MDRTB	750MG	ORAL	500MG	MDR-TB THERAPY
36	F	33.5	ANAEMIA	Other	No	No	FERSOLATE TAB AND FRUIT	CYCLOSERINE	MDRTB	500MG	ORAL		MDR-TB THERAPY
37	M	58	VOMITING	Recovered fully	No	No	PLASIL TAB	CYCLOSERINE	MDRTB	750MG	ORAL		MDR-TB THERAPY
48	M	54.5	GENERALISED BODY WEAKNESS	Recovered fully	No	No	TRANSFERED ON POINT OF BLOOD AND MULTIVITE TAB	CYCLOSERINE	MDRTB		ORAL		MDR-TB THERAPY
52	M	59	GENERALISED BODY PAINS	Recovered fully			ONGOING FOR MDRTB TREATMENT. ACACLOFENAC,PCM AND THE ASSURANCE	PYRAZINAMINE	MDRTB TREATMENT	2G DAILY	ORAL	1G DAILY,750MGDAILY,750MGDAILY	MDR-TB TREATMENT,MDR-TB TREATMENT,MDR-TB TREATMENT
40	M	56	SWELLING OF THE FACE AND LEGS	Other	No	No		AMOXYCILLIN	TREAMENT OF PEPTIC ULCER	500MG	ORAL	500MG	PEPTIC ULCER
60	F	40	SEVERE ANAEMIA	Other	Yes	Yes	SWITCH TO TDF/3TC/EFV	3TC, NVP, AZT	TREATMENT OF HIV/AID	1 TAB DAILY	ORAL	1TAB	OI PROPHYLAXIS, MGT OF HIV
25	F	40	SKIN RASHES, PRURITIS	Recovered fully	No	No	SEPTRIN WAS IMMEDIATELY DISCONTINUED	CTX	PROPHYLAXIS	960MG	ORAL	1 AT NIGHT	MGT OF HIV
39	F	60	GENERALISED PRURITUS OF THE BODY, ANGIONEUROTIC EDEMA	Recovered fully	No	No	STOP FANSIDER		PROPHYLAXIS		ORAL	1TAB	ANTIANAEMIC
44	F	56	ANAEMIA	Recovered fully	Yes	No	BLOOD TRANSFUSION, AZT/3TC/NVP SWITCH TO EFV/3TC/TDF	AZT/3TC/NVP	TREATMENT OF HIV/AID	1 TAB DAILY	ORAL	1TAB	PROPHYLAXIS
26	M	40	ANAEMIA	Recovered fully	Yes	Yes	BLOOD TRANSFUSION	AZT/3TC/NVP	TREATMENT OF HIV/AID	1 BD	ORAL	1TAB	PROPHYLAXIS
4	F	10	SKIN RASHES	Other	No	No	STOP EFAVIRENZ	CAP EFAVIRENZ	TREATMENT OF HIV/AID		ORAL		MGT OF HIV
8	M	28	RASHES, SEVERE PRURITIS	Other	No	No	SEPTRIN WAS IMMEDIATELY DISCONTINUED	CTX	PROPHYLAXIS		ORAL		MGT OF HIV
10	F	7.8	RASHES ON THE FACE AND BOTH LEGS, PRURITIS	Other	No	No	SEPTRIN WAS IMMEDIATELY DISCONTINUED	CTX	PROPHYLAXIS	290MG DAILY	ORAL		MGT OF HIV
40	F	110	RASHES, PRURITIS	Other	No	No	SEPTRIN WAS IMMEDIATELY DISCONTINUED	CTX	PROPHYLAXIS	960MG	ORAL	1TAB	MGT OF HIV
13	F	286	RASHES, PRURITIS	Other	No	No	SEPTRIN WAS IMMEDIATELY DISCONTINUED	CTX	PROPHYLAXIS		ORAL		MGT OF HIV
47	M	66	SEVERE PRURITIS	Other	No	No	SEPTRIN WAS IMMEDIATELY DISCONTINUED	CTX	PROPHYLAXIS	2DAILY	ORAL		MGT OF HIV
14	F	28	ANAEMIA	Recovered fully	No	No	ZDV/3TC SWITCH TO ABC/3TC	COMBIVIR	MGT OF HIV	2BD	ORAL	1TAB	PROPHYLAXIS
40	M	55	SEVERE VOMITING, INSOMNIA	Other	Yes		IVF RINGES	3TC//ZDV/NVP	HIV/AIDS		ORAL	960MG
18	F	38	SEVERE PRURITUS, RESTLESSNESS, IRRATIONAL TALKS AND BEHAVIOUR	Recovered fully	No			CHLOROQUINE	MALARIA	500MG	ORAL	1TAB	MALARIA FEVER
24	M	50	FACIAL SWELLING, DARK COLORED URINE,	Recovered fully	No		STOP DRUG AND COMMENCE DOT	RIFAMUPICIN CAPS		600MG	ORAL
9	M	25	PRURITIS	Recovered fully	Yes	Yes	STOP QUININE	QUININE	MALARIA		I V INFUSION
30	M	70	SEVERE HEADACHE, DIZZINESS, WEAKNESS	Recovered fully	No	No	TABS PCM, BED REST, REASSURANCE	EFV/3TC/TNF	PEP	1200MG	ORAL
57	M	60	SEVERE VOMITING, BODY WEAKNESS, ANAEMIA	Recovered fully	No		ORS, ASTYMIN	3TC/NVP/AZT	HIV/AIDS	650MG	ORAL	960MG	RTI
29	F		NIGHTMARES, WEAKNESS, DIZZINESS, VOMITING,		No			TENOFOVIR	ARV		ORAL	960MG	PROPHYLAXIS
43	M		FEVER, HEADACHE, STOOLING, ANAEMIA, IMMONOLOGIC FAILURE	Recovered fully	Yes		REGIMEN SWITCHED	9498-04-01	ARV	1BD	ORAL	960MG	OI PROPHYLAXIS, MGT OF HIV
44	F		HALLUCINATION, VOMITING, STOOLING, HEADACHE, STOMACHE	Recovered fully	No				ARV	1 AT NIGHT	ORAL	1TAB	OI PROPHYLAXIS, MGT OF HIV
36	F		DIZZINESS, HEADACHE		No			TENOVIR/LAM(EFV)	ART	1 TAB DAILY	ORAL	960MG	PROPHYLAXIS
30	F		DIZZINESS, BLURRED VISION	Recovered fully	No			TENOVIR/LAM(EFV)	ARV	1 TAB DAILY	ORAL	960MG	PROPHYLAXIS
46	F		SKIN RASH, BLACK SPOTS	Other	No				O I PROPHYLAXIS	1 TAB DAILY	ORAL	1TAB	ARV
41	M		DIZZINESS, BLURRED VISION, HEADACHE		No			TENOVIR/LAM(EFV)	ARV	T OD	ORAL	960MG	PROPHYLAXIS
22	F	823	STOOLING	Other	No			TENO/LAMI/EFV	ARV	1 TAB DAILY	ORAL	960MG	OI PROPHYLAXIS, MGT OF HIV
1991-06-03	F		SEVERE STEVENS JOHNSON SYNDROME, SWOLLEN LYMPH NODES, EPIGASTRIC, HIP BURNS, RASH, EROSIONS AND ULCERATION		Yes			METRODAZOLE	DIARRHOEA	2 TABS BD	ORAL		ANTIMALARIA, ANTIBIOTICS, BIPDAR DISORDER
1969-06-12	F	30	GENERALISED WEAKNESS, ANAEMIA	Other	No		DOUBLE DOSE HAEMATENICS ZD FOLIC ACID	ZDV/LAMI	ANTIRETROVIRAL THERAPY	1 TAB DAILY	ORAL	960MG	PROPHYLAXIS
51	F	56	PAIN, NUMBNESS IN THE FEET AND HANDS	Other	No		TAB PYRIDOXINE 50MG DAILY	CHLOROQUINE	ANTIRETROVIRAL THERAPY		ORAL	960MG	PROPHYLAXIS
35	F	55	SEVERE HEADACHE,	Other	No	No		AZT/3TC/NVP	ANTIRETROVIRAL THERAPY	TWICE DAILY	ORAL		SUPPLEMENT, PROPHYLASIL
45	F	36	DIZZINESS, ITCHING ALL OVER THE BODY, MALARIA	Other	No	No		TDF/3TC/EFV	ANTIRETROVIRAL THERAPY	1 TAB DAILY	ORAL		SUPPLEMENT, PROPHYLASIL
45	F	36	DIZZINESS, ITCHING ALL OVER THE BODY, MALARIA	Other	No	No		TDF/3TC/EFV	ANTIRETROVIRAL THERAPY	1 TAB DAILY	ORAL		SUPPLEMENT, PROPHYLASIL
48	M	82	JOINT PAIN, WAIST PAIN, MUSCLE PAIN	Other	No	No	TREATED WITH NSAID	AZT/3TC/NVP	ANTIRETROVIRAL THERAPY	1 TAB DAILY	ORAL	1TAB	SUPPLEMENT, PROPHYLASIL
20	F	43	PAIN IN THE LEGS	Other	No	No	TAB IBUPROFEN	TDF/3TC/EFV	ANTIRETROVIRAL THERAPY		ORAL		SUPPLEMENT, PROPHYLASIL
30	F		STOMACH ACHE, NAUSEA, MALAISE		No	No	COUNSELLED	TDF/3TC/EFV	ANTIRETROVIRAL THERAPY	1 TAB DAILY	ORAL	1TAB	SUPPLEMENT, PROPHYLASIL
37	F	44	HEADACHE	Recovered fully	No	No		AZT/3TC/NVP	ANTIRETROVIRAL THERAPY	TWICE DAILY	ORAL		SUPPLEMENT, PROPHYLASIL
25	F	55	SEVERE HEADACHE	Other	No	No		TDF/3TC/EFV	ANTIRETROVIRAL THERAPY		ORAL		SUPPLEMENT, PROPHYLASIL
21	F	32	RESTLESSNESS, DEPRESSION, MALAISE, WEIGHT LOSS	Other	No	Yes	DRUG SWITCH TO AZT/3TC/NVP	TDF/3TC/EFV	ANTIRETROVIRAL THERAPY	1 TAB DAILY	ORAL		SUPPLEMENT, PROPHYLASIL
15/09/2000	M	35	ANAEMIA	Recovered fully	Yes		DISCONTINUED ZDV/3TC/NVP, BLOOD TRANSFUSION	ZDV/3TC/NVP	HIV/AIDS	300MG	ORAL		PROPHYLAXIS, ANTI HELMINTHIZS
	F	33	SEVERE ANAEMIA	Recovered fully	Yes		WHOLE BLOOD TRANSFUSION	ZDV/3TC/NVP	HIV/AIDS		ORAL		PROPHYLAXIS
	F	48.5	VOMITING, ABDOMINAL PAIN	Other	No		SUSP EMTRISIL 10ML	TDF/3TC/EFV	HIV/AIDS	600/300/300	ORAL
	M	79	ANAEMIA	Recovered fully			DISCONTINUED ZDV	AZT/3TC/NVP	HIV/AIDS		ORAL	960MG	PROPHYLAXIS
	F	72.8	GENERALISED EDEMA	Recovered fully	No		DISCONTINUED TDF/3TC/EFV, START ZDV/3TC/NVP	TDF/3TC/EFV	HIV/AIDS	300/300/200	ORAL	960MG	PROPHYLAXIS
	F	46	MACULOPAPULAR RASH	Recovered fully	No		DISCONTINUED CTX, LORATIDINE	CTX	PROPHYLAXIS	960MG	ORAL		BILATERAL
56	F	41	NAUSEA, VOMITING	Recovered fully	No		DISCONTINUED CTX	CTX	PCP	1 OD	ORAL	1. O . D	ART
	M	54.5	HEADACHE, COUGH	Recovered fully	No		DISCONTINUED CTX	CTX	PROPHYLAXIS	1 BD	ORAL	1. O . D	ARV
34	M	57	SEVERE HEADACHE		No		DISCONTINUED CTX	CO-TRAMADOLE	PCP	1 BD	ORAL		URTI
25	F		ALLERGIC RASH		No		TAB CHLORPHENIRAMINE	CTX	PCP	1 TAB DAILY	ORAL	1TAB	ART
33	F	97	GENERALISED PRURITIS	Recovered fully	No		TAB NEUROVITE FORTE	CTX	PCP PROPHYLAXIS	960MG	ORAL	1TAB	ART
	F		NAUSEA, VOMITING	Recovered fully	No		DISCONTINUED CTX	CTX	PCP PROPHYLAXIS	960MG	ORAL		HIV
40	F	58.5	SEVERE HEADACHE	Recovered fully	No		DISCONTINUED CTX	CO-TRIMOXAZOLE	PCP PROPHYLAXIS	1 BD	ORAL	1. O . D	ART
	F	66	BODY WEAKNESS	Recovered fully			GENEROUS GLUCOSE DRINK, AVOID FATTY DINNER	TDF, 3TC, EFV	HIV/AIDS	600/300/300	ORAL	960MG	PCP PROPHYLAXIS
1969-09-03	F	45	CRAWLING MOVEMENT ALL AROUND THE BODY				NEUROVITE FORTE	TDF/3TC/EFV	HIV/AIDS	600/300/300	ORAL		UTI
42	F	58	DERMATITIS	Recovered fully	No		DISCONTINUED CTX	CTX	PCP PROPHYLAXIS	960MG	ORAL	1TAB	ARV
		79	ALLERGIC RASH	Recovered fully	No		DISCONTINUED CTX	CO-TRIMOXAZOLE	PCP PROPHYLAXIS	960MG	ORAL		URTZ
	F		ALLERGIC RASH	Recovered fully	No		LORATIDINE TABS	TDF/3TC/EFV	HIV/AIDS		ORAL	960MG	PCP PROPHYLAXIS
	F	102	RASH	Other	No		LORATIDINE TABS	TDF/3TC/EFV	HIV/AIDS		ORAL		PCP PROPHYLAXIS
	M	56.5	ABDOMINAL DISCOMFORT		No		TAKE MEDICINE WITH NON FATTY MEALS	TDF/3TC/EFV	HIV/AIDS	600/300/300	ORAL	960MG	PCP PROPHYLAXIS
	F	46	VOMITING, DIZZINESS, FATIQUE	Recovered fully	No		DISCONTINUED CTX	ISOMNIZED TAB	1PT		ORAL		PROPHYLAXIS
	F	65	PRURITIS, RASH	Recovered fully	No		PIRITON DISCONTINUED, CTX	CTX	PCP PROPHYLAXIS	960MG	ORAL		HIV MANAGEMENT
	F	59	NUMBNES OF THE SOLES OF FEET		No		NEUROTEX FORTE, PYRODOXINE	TDF/3TC/EFV	HIV/AIDS	600/300/300	ORAL	960MG	PCP PROPHYLAXIS
	F	47	GENERALISED BODY WEAKNESS				TAKE ARV AND CTX	TDF/3TC/EFV	HIV/AIDS		ORAL		PCP PROPHYLAXIS
	F	33.5	DIZZINESS, WEAKNESS		No		AVOID FATTY MEALS, TAKE MEDICINE TWO HRS AWAY FROM MEAL	TDF/3TC/EFV	HIV/AIDS		ORAL	960MG	PCP PROPHYLAXIS
	M	88	HEADACHE	Recovered fully	No		INCREASED FOOD AND FLUID INTAKE	ARTEMETER	MALARIA	1 TAB DAILY	ORAL		HEADACHE, FEVER
	F		FATIGUE, DIZZINESS, GENERAL DISCOMFORT	Recovered fully	No		DISCONTINUED CTX	CTX	PCP PROPHYLAXIS		ORAL		HIV
	F	46	SEVERE ABDOMINAL DISCOMFORT	Recovered fully	No		DISCONTINUED ISONIAZID	ISOMNIZED TAB	1PT		ORAL		HIV MANAGEMENT
	F		FATIGUE, WEAKNESS	Recovered fully	No		INCREASED FOOD AND FLUID INTAKE	ISOMNIZED TAB	1PT		ORAL		HIV
	M		WEAKNESS, FATIGUE		No		GENEROUS GLUCOSE DRINK, AVOID FATTY DINNER	TDF/3TC/EFV	HIV/AIDS	150MG	ORAL		PCP PROPHYLAXIS
	F	46	VOMITING, DIZZINESS, FATIQUE	Recovered fully	No		DISCONTINUED INH, ORS, PRN, ZINC	ISOMNIZED TAB	1PT		ORAL		HIV
	F	75.5	HEADACHE, BODY PAIN		No		COARTEM, PCM, NEUROVITE	TDF/3TC/EFV	HIV/AIDS		ORAL
	F	59	RASH	Recovered fully	No		DISCONTINUED CTX	CTX	PCP PROPHYLAXIS	960MG	ORAL		HIV
46	M	72	VESICULZR RASH	Recovered fully	No	No	LORATIDINE TABS	ISOMNIZED TAB	TUBERALLOSIS		ORAL		TUBERCULOSIS
22	M	74	STIFFNESS OF UPPER AND LOWER LIMB	Recovered fully	No	No	PYRIDOXINE	CYCLOSERINE	MDRTB	750MG	ORAL		MDRTB
22	M	74	TIREDNESS, BODY WEAKNESS	Recovered fully	No	No	INCREASED FOOD AND FLUID INTAKE	LEVOFLOXACIN	MDRTB	750MG	ORAL		MDR-TB THERAPY
22	M	74	LOSS OF APPETITE,WEIGHT LOSS	Recovered fully	No	No	COUNSELLED	PROTHONAMIDE	MDRTB	750MG	ORAL		MDR-TB THERAPY
61	M	72	BODY WEAKNESS		Yes	Yes	PCM	PYRAZINAMIDE	MDRTB	200MG	ORAL		MDR-TB THERAPY
61	M	72	HYPOGLYCAEMIA		No	No	FORTIFIED DIRT, CLOSE MONITORY	PROTHONAMIDE	MDRTB	100mg	ORAL		MDR-TB THERAPY
61	M	72	LOSS OF APPETITE, BITTER TASTE IN MOUTH		Yes	Yes	DIET	PROTHONAMIDE	MDRTB	100mg	ORAL		MDR-TB THERAPY
61	M	72	FREQUENT URINATION		No	No	CLOSE MONETORY OF BLOOD SUGAR	CAPREOMYCIN	MDRTB	750MG			MDR-TB THERAPY
61	M	72	NUMBNESS OF THE FEET		No	No	NEUROVITE FORTE	LEVOFLOXACIN	MDRTB	750MG	ORAL		MDR-TB THERAPY
60	F	50	PALPITATIONS		No	No		PYRAZINAMIDE	MDRTB	1200MG	ORAL		MDR-TB THERAPY
60	F	50	GENERAL BODY WEAKNESS, MODERATE HYDRATION		No	No	INCREASED FOOD AND FLUID INTAKE	PYRAZINAMIDE	MDRTB	1200MG	ORAL		MDR-TB THERAPY
60	F	50	IRRATIONAL SPEECH AND BEHAVIOUR		No	No	RESPERIDONE TAB, DIAZEPAN TAB	CYCLOSERINE	MDRTB	500MG	ORAL		MDR-TB THERAPY
60	F	50	ELECTROLYTE IMBALANCE,		No	No	SLOW K TAB	CAPREOMYCIN	MDRTB	750MG			MDR-TB THERAPY
60	F	50	DYPSNIA		No	No	BREATHING ASSISTED WITH OXYGEN	CYCLOSERINE	MDRTB	500MG	ORAL		MDR-TB THERAPY
60	F	46	TACHYCARDIA	Death	No	No		CYCLOSERINE	MDRTB	500MG	ORAL		MDR-TB THERAPY
60	F	46	EXTREME FEVER	Death	No	No	TEPID SPORGE	CYCLOSERINE	MDRTB	500MG	ORAL		MDR-TB THERAPY
25	F	50	SEVERE CHEST PAIN	Recovered fully	No	No		HYOSCINE	GIT SPASM	40MG	INTRAVENOUS		GASTRIC/DUODE, BACTERIA/INFECTION
34	F	70	INSOMNIA, TREMOR, BODY AND JOINT WEAKNESS	Other	No	No	PCM ADHERANCE WAS STRENGTHENED, FORMULATION CHANGED FROM HETERO TO MYLAN	TDF/3TC/EFV	HIV/AIDS	600/300/300	ORAL	960MG	OI PROPHYLAXIS, MGT OF HIV
50	F	50	BURNING AND PAINFUL PRURITIS ON BOTH FEET	Other	No	No	VIT B1+B6+B12, CHLORPHENIRAMINE	ATAZANAVIR/RITONAVIR	HIV/AIDS	600/300/300	ORAL		HIV
32	F	45	RASHES, ITCHING,	Other	No	No	TAB PREDMISOLONE, TAB LORATADINE	TDF/3TC/EFV	HIV/AIDS	600/300/300	ORAL	960MG	OI PROPHYLAXIS, MGT OF HIV
36	F	80	FEELING OF NUMBNESS AT THE EXTREMITIES	Recovered fully	No	No	TAB PYRIDOXINE	ISOMNIZED TAB	PROPHYLAXIS	300MG	ORAL		MGT OF HIV
32	F	54	RASHES, PRURITIS	Recovered fully	No	No	PREDNISOLONE, LORATIDINE TABS	TDF/3TC/EFV	TREATMENT OF HIV	600/300/300	ORAL	960MG	OI PROPHYLAXIS, MGT OF HIV
42	F	52	RASHES, PRURITIS	Other	No	No	TABS LORATIDINE 10MG	EFV	TREATMENT OF HIV/AID	600MG	ORAL		PROPHYLAXIS
50	M	72.5	WIDESPREAD HYPERPIGMENTATION OF THE SKIN	Other	No	No	LORATIDINE TABS	SULPHADINE	MALARIA		ORAL		HEADACHE
58	M	71	BACK PAIN	Recovered fully	No	No	AMLODEPINE WITHDROWN	AMLODIPINE	HIGH BLOOD PRESSURE		ORAL
41	M	59	HEADACHE	Recovered fully	No		TAB CARBAMAZEPINE, TAB PCM	TENOFOVIR	HIV/AIDS		ORAL	960MG	PROPHYLAXIS
54	M	73	INSOMNIA	Other	No			TENOFOVIR	HIV/AIDS		ORAL	960MG	PROPHYLAXIS
42	M	50	PEDAL SWELLING, PRURITIS	Other	No		TAB LAXIS, LORATIDINE	TENOFOVIR	HIV/AIDS	600/300/300	ORAL	960MG	PROPHYLAXIS
46	M	80	BODY SHAKING, HUNGER, STOMACH PAIN	Other	No		DRUG WITHDRAWN	CEFUROXIME	TYPHOID FEVER	500MG	ORAL		PAINS, MALARIA
67	F	61	DIZZINESS, FEVER, HEADACHE, CONSTIPATION, VOMITING	Recovered fully	No		DISCONTINUED CTX	PCM	CHRONIC PAINS NEUROPATHY		ORAL
30	F	70	PRURITIS, INSOMNIA	Other	No		TAB LORATADINE 10MG DAILY	CTX	PROPHYLAXIS	960MG	ORAL		HIV
46	F	134	BILATERAL PITTING, PEDAL OEDEMA, GLUCOSE INTOLERANCE, OBESITY	Recovered fully	No		TAB LASIX	ZDV	HIV/AIDS	600/300/300	ORAL	960MG	PROPHYLAXIS
33	F	42	LOOSE STOOL, VOMITTING	Recovered fully	No		TAB FLAGYL	TENOFOVIR	HIV/AIDS	600/300/300	ORAL	960MG	PROPHYLAXIS
59	F	48	BLURRING OF VISION, EPIGASTRIC PAIN	Other	No			CTX	PROPHYLAXIS	960MG	ORAL
66	M	56	EXCESSIVE URINATION	Other	No			ZDV	HIV/AIDS	600/300/300	ORAL	960MG	PROPHYLAXIS
46	F	71	LOW CD4 COUNT	Other	No			ISOMNIZED TAB	IPT		ORAL		HIV
39	F	37	STOOLING, FREGUENT FEVER, LACK OF APPETITE	Other	No			TENOFOVIR	HIV/AIDS	600/300/300	ORAL	960MG	PROPHYLAXIS
25	M	59	BACK PAIN	Other	No		CAP PIROXICAM	EFV	HIV/AIDS	960MG	ORAL	960MG	PROPHYLAXIS
40	F	62	INSOMNIA	Recovered fully	No	No		TENOFOVIR	HIV/AIDS	300MG	ORAL	960MG	PROPHYLAXIS
60	F	72	HEADACHE, CHILLS	Other	No	No	TAB ACT AND PCM	NVP	HIV/AIDS	200MG	ORAL	960MG	IPT
44	F		STOMACH DISTURBANCE, FREQUENT URINATION, BITTER TASTE	Recovered fully	No			PIROXICAM	PAIN		ORAL		PAIN
	F	5	PEELING OF SKIN, LIP, SORES, MOUTH SORE, OOZING SORES ON SKIN, SKIN DISCOLOURATION	Death	Yes		I V CEFTRAXONE, I V FLAGYL, IVF 4.3	CTX	ENERITIS	5ML BD	ORAL		STOOLING, FEVER
43	F	49	SEVERE DIZZINESS, DIFFICULTY WITH BREATHING, NAUSEA	Other	Yes	No	IVF, AMINOPHYTHINE INFUSION	RHZE	TUBERALLOSIS	3	ORAL
30	F	60	BOIL ON THE FACE	Other	No	No	TAB CO-AMOXYCLAR, TAB VIT C	EFV	HIV/AIDS	600/300/300	ORAL	960MG	IPT
35	F	47	LOW CD4 COUNT	Recovered fully	No			TENOFOVIR	HIV/AIDS	600/300/300	ORAL
80	M	70	PRURITIS, RASH	Other	No		TAB LORATADINE 10MG DAILY	RAMIPRIL	HYPERTENSION	1 TAB DAILY	ORAL		HYPERTENSION
20	F	69	RUNNING STOMACH, WEAKNESS, BITTER TASTE, DROWSINESS	Other	No			ZDV	POST EXPOSURE PROPHYLAXIS	600/300/300	ORAL
30	F	63	RASHES, ITCHING	Other	No		CAP AMOXIL, TAB LEXOTAN	TENOFOVIR	HIV/AIDS	600/300/300	ORAL		HIV
30	F	64	PRURITIS, RASH	Other	No		TAB LORATADINE 10MG DAILY	CO-TRIMOXAZOLE	PROPHYLAXIS	960MG	ORAL		HIV
20	F	36	PAIN	Recovered fully	No		TAB TRAMADUL	RIFAMUPICIN CAPS	TB PROPHYLAXIS	300MG	ORAL	50MG DAILY	PROPHYLAXIS
58	F	ST		Other	No		TAB LEUPROFEN, PCM	TENOFOVIR	HIV/AIDS	600/300/300	ORAL	960MG	PROPHYLAXIS
32	M	50	STOOLING	Recovered fully	No		TAB CIPROFLIXASIN 500MG B.D, TAB LORATIDINE, PIRITON	CTX	O I PROPHYLAXIS	960MG	ORAL
34	F		INSOMNIA	Recovered fully	No		TAB AMITRIPTILLINE 25MG, NOCTI, TAB PCM 500MG	TDF/3TC/EFV	ART	1 TAB DAILY	ORAL	960MG	OI PROPHYLAXIS, MGT OF HIV
36	F	50	PRURITIC RASHE	Recovered fully	No		TAB PREDNISETONE, TAB PIRITON, TAB CIPRO	TDF/3TC/EFV	ART	1 TAB DAILY	ORAL	960MG	OI PROPHYLAXIS, MGT OF HIV
55	F	55	STOLLING, PRURITUS	Recovered fully	No		TAB CIPROFLIXASIN 500MG B.D, TAB LORATIDINE, PIRITON	TDF/3TC/EFV	ART	1 TAB DAILY	ORAL	960MG
46	M	55	SKIN RASHES, RASHES	Recovered fully	No		PIRITON	AZT/3TC/NVP	ART	1TAB DAILY	ORAL		OI PROPHYLAXIS, MGT OF HIV
68	F	45	STOOLING	Recovered fully	No		TAB CIPROFLIXASIN 500MG B.D, TAB LORATIDINE, PIRITON	TDF/3TC/EFV	ART	1 TAB DAILY	ORAL		OI PROPHYLAXIS, MGT OF HIV
	F	65	DIZZINESS	Recovered fully	No		TAB B COMPLEX, TAB ASTYNIM	TDF/3TC/EFV	ART	1 TAB DAILY	ORAL		OI PROPHYLAXIS, MGT OF HIV
60	F	45	DIZZINESS	Recovered fully	No		TAB B COMPLEX, TAB ASTYNIM	TDF/3TC/EFV	ART	1 TAB DAILY	ORAL		OI PROPHYLAXIS, MGT OF HIV
	F	75	STOOLING	Recovered fully	No		CAP LOPERAMIDE/TINDAZOLE, ORS	TDF/3TC/EFV	ART	1 TAB DAILY	ORAL	960MG	OI PROPHYLAXIS, MGT OF HIV
59	F	65	TINNITUS, NUMBNESS AT THE EXTREMITIES		No		TAB PYRIDOXINE, TAB BCO	TDF/3TC/EFV	ART	1 TAB DAILY	ORAL		OI PROPHYLAXIS, MGT OF HIV
40	M	62	SEVERE NUMBNESS ON FEET, FEVER		No	No	TAB VIT C, B6, PCM	RIF/INH/ETAM	ANTI TB		ORAL	1. O . D	ART
37	F	38	NAUSEA, VOMITING		No	No	TAB VIT B6	INH/RIF/PIR/ETH	ANTI TB		ORAL	1. O . D	ART
57	M	72KA	NUMBNESS		No	No	TAB VIT B6	RIF/INH/ETAM	ANTI TB		ORAL	1. O . D	ART
39	M	43	SEVERE BACKACHE		No	No	TAB IBUPROFEN 400MG BD5/7 REASSURE	INH/RIF/PIR/ETH	ANTI TB		ORAL
36	M	51	TINNITUS, LOSS OF BALANCE		No	No	REF DR	RIF/INH/ETAM	ANTI TB		ORAL
35	F	52	GENERAL WEAKNESS OF THE BODY, LACK OF APPETITE, RASHES		No		REFFERED TO THE DR	EFV/LAMI/TEN	ARV	2OD	ORALLY	1. O . D	TB
36	F	54	NUMBNESS		No	No	TAB VIT B6, TAB PIRITON	EFV/LAM/TENOFOVIR	ARV	1 OD	ORAL
45	F	56	SEVERE BODY RASHES		No	No	TAB PIRITON	EFV/LAM/TENOFOVIR	ART	1 OD	ORAL	1. O . D	OI PROPHYLAXIS, MGT OF HIV
63	M	61	NUMBNESS OF THE HANDS		No		VIT B6	EFV/LAM/TENOFOVIR	ARV	1 OD	ORAL	1. O . D	OI PROPHYLAXIS, MGT OF HIV
51	F	65	SEVERE BODY ITCHING AND RASHES		No	No	TAB PIRITON	EFV/LAM/TENOFOVIR	ARV	1 OD	ORAL	1. O . D	OI PROPHYLAXIS
45	F	58	DIZZINESS , FEVER, NUMBNESS		No	No	VIT B6	EFV/LAM/TENOFOVIR	ARV	1 OD	ORAL	960MG	OI PROPHYLAXIS, MGT OF HIV
42	F	58	BREAST PAIN, TINNITUS		No	No	REF GYNAECOLOGIST, REASSURANCED	LAMIVUDINE/ TENOVIR/LOP	ARV	OD	ORAL	960MG
36	F	83	EXCESSIVE WEIGHT GAIN, AMENNORRHOEA		No	No	REF. NUTRITIONIST	EFV/LAM/TENOFOVIR	ART	1 OD	ORAL	960MG	OI PROPHYLAXIS, MGT OF HIV
12	F	29	RASHES, SEVERE COUGH		No	No		LAMIVUDINE/ ZDV	ARV	OD	ORAL	480MG	OI PROPHYLAXIS, MGT OF HIV
29	F	62	DIZZINESS, GENERAL BODY PAIN, SWEATING, HEADACHE		No	No	COUNSELLED, TAB PCM	EFV/LAM/TENOFOVIR	ART	1 OD	ORAL	1. O . D	OI PROPHYLAXIS, MGT OF HIV
28	F	54	SEVERE BODY ITCHING		No	No	TAB PIR TOO, TAB PREDNESOLONE	CTX	O I PROPHYLAXIS	1 OD	ORAL
47	F	48	AMENORRHOEA		No	No	OBRON CO	LAM/ZDV	ARV	1 OD	ORAL	960MG	OI PROPHYLAXIS, MGT OF HIV
37	M	54	NAUSEA, VOMITING	Other	No	No	TAB METOCLOMPRAMIDE	TAB PROTHRONIMIDE	MDRTB	250MG	ORAL		MDR-TB THERAPY
37	M	54	DEPRESSION	Recovered fully	No	No	TAB AMITRIPTILLINE 25MG, NOCTI, TAB PCM 500MG	TAB CYDOSERINE	MDRTB	250MG	ORAL		MDR-TB THERAPY
37	M	54	PSYCHOSIS	Other	No	No	TAB HALOPERIDOL AND BENZHEXOL	TAB CYDOSERINE	MDRTB	250MG	ORAL		MDR-TB THERAPY
26	M	58	PSYCHOSIS	Other	No	No	TABS HALOPERIDOL AND BENZHEXOL	TAB CYDOSERINE	MDRTB	250MG	ORAL		MDR-TB THERAPY
26	M	58	NAUSEA, VOMITING	Other	No	No	TAB METOCLOMPRAMIDE	TAB PROTHRONIMIDE	MDRTB	250MG	ORAL		MDR-TB THERAPY
26	M	58	PERIPHERAL NEUROPATHY	Other	No	No	TAB NEUROVITE FORTE	TAB CYDOSERINE	MDRTB	250MG	ORAL		MDR-TB THERAPY
34	M	50	PSYCHOSIS	Other	No	No	TAB HALOPERIDOL AND BENZHEXOL	CYCLOSERINE	MDRTB	250MG	ORAL		MDR-TB THERAPY
31	M	62	ARTHRALGIA	Recovered fully	No	No	TAB DICLOFENAC	PYRAZINAMIDE	MDRTB	500MG	ORAL		MDR-TB THERAPY
33	M	41	PSYCHOSIS	Other	No	No	TAB HALOPERIDOL AND BENZHEXOL	CYCLOSERINE	MDRTB	250MG	ORAL		MDR-TB THERAPY
33	M		WEAKNESS, SEVERE JAUNDICE, SEVERE PAIN IN BOTH LEGS,	Other	Yes	Yes	IV FLUIDS, ROUTINE DRUGS		ANTI TB	4 DAILY	ORAL	T NOCTE	ARV
	F		PRURITIS ALL OVER THE BODY	Other	No	No	WITHDRAWAL OF THE DRUG(ZIDOVUDINE)	CTX	PREVENTION OF OPPORTUNICTIC INFECTION		ORAL	T NOCTE	ARV
9	F		SEVERE VOMITING	Recovered fully	No	No	COUGH SYRUP		ANTI TB		ORAL		A RV
51	F		SEVERE BODY SHAKING, DISCOMFORT	Recovered fully	No	No	DRUG WITHDRAWN	ISOMNIZED TAB	TB PROPHYLAXIS		ORAL		ARV
33	M		BLISTER ON THE L EFT AND RIGHT EYE	Other	No	No	TAB LORATADINE 10MG DAILY	CTX		960MG	ORAL		ANTI-RETROVIRAL THERAPY
16	F		SEVERE VOMITING, WEAKNESS, LOSS OF APPETITE	Recovered fully	No	No	ORS	RHZE	ANTI TB		ORAL
21	F		BEEN ON ATRIPLA	Recovered fully	No	No		3TC, TDF, EFV	ARV	T NOCTE	ORAL	T BD
51	M		HYPERSENSITIVITY REACTION, RASHES, PRURITIS		No	No	LORATIDINE TABS	CTX	ADJUNCT THERAPHY		ORAL	OD	ARV
36	F		HYPERSENSITIVITY REACTION, RASHES, PRURITIS	Congenital Abnormality	No	No	TAB LORATADINE 10MG DAILY	CTX	ADJUNCT THERAPHY	960MG	ORAL	1. O . D	ARV
35	F		SEVERE RASHES, PRURITIS	Other	No	No	DRUG WITHDRAWN	ZDV/3TC/NVP	ARV	T B.D	ORAL
28	F	58	BLACK PATCHES ALL OVER THE BODY	Other	No	No	DRUG WITHDRAWN	NATIVE MEDICINE	TO CURE LEG PAIN		ORAL		ART
36	M	36	RESTLESSNESS, INCOHERENT,	Recovered fully	No			ARTEMETER	ANTIMALARIA		ORAL		ANALGESIC
53	F		STEVENS JOHNSON SYNDROME	Recovered fully	No	No	CTX	CTX	UPPER RESPIRATORY TRACT INFECTION	960MG	ORAL	T BD	CATARRH
	M		SEVERE BURNS AROUND THE MOUTH AREA	Other	No			CTX	O I PROPHYLAXIS	960MG	ORAL		ARV
	M	12	WEAKNESS, HIGH BODY TEMPERATURE, LOSS OF APPETITE	Recovered fully	No	No	DRUG WITHDRAWN	ARTEMETER	ANTIMALARIA	1000MG		500MG	ANALGESIC
4	F		FAINTED 10 MINUTES AFTER TAKING THE DRUG	Recovered fully	No	No	DICLOFENAC TABLET	ARTEMETER	ANTIMALARIA		ORAL
58	F	62	STEVEN JOHNSON LIKE REACTION	Recovered fully	Yes		DRUG WITHDRAWN	ARTEMETER	MALARIA		ORAL	500MG	TYPHOID, FEVER
32	F	60	PRURITIS, RASHES, BOIL IN PUBIC AREA, VAGINAL DISCHARGE	Other	No	No	TAB LORATADINE 10MG DAILY	3TC, TDF, EFV	ARV	OD	ORAL		ART
47	F	67	INTERNAL HEAT, EXCESSIVE SPITTING, EXCESSIVE SWEATING	Recovered fully	No		CTX WAS STOOPED	CTX	ANTI-INFECTIVE	OD	ORAL	OD	ART
30	F	46	KNEE JOINT PAIN	Other	No	No	IBUPROFEN TAB	TDF/3TC/EFV	ART	OD NOCTE	ORAL	OD	OI PROPHYLAXIS, MGT OF HIV
16	F	44	NAUSEA, SEVERE HEADACHE, INSOMNIA, RESTLESSNESS	Other	No		TAB PCM	ALLUVIR	MGT OF HIV	200MG	ORAL		OI PROPHYLAXIS, MGT OF HIV
17	F	47	SKIN DISCOLORATION	Other	No		PATIENT REFERRED TO SEE DERMATELOGIST	NVP	MGT OF HIV	200MG	ORAL		OI PROPHYLAXIS, MGT OF HIV
28	F	67	PRURITIS ALL OVER THE BODY, RASHES	Recovered fully	No		SEPTRIN WAS IMMEDIATELY DISCONTINUED	CTX	O I PROPHYLAXIS	960MG	ORAL		MGT OF HIV
31	F	64	DIZZINESS, POLYPHAGIA	Recovered fully	No		PATIENT REASSURED	ALLUVIR	MGT OF HIV	200MG	ORAL		OI PROPHYLAXIS, MGT OF HIV
28	F	67	DIZZINESS	Other	No		PATIENT REASSURED	EFV	MGT OF HIV	600MG	ORAL		OI PROPHYLAXIS, MGT OF HIV
43	M	57	DIZZINESS, NIGHTMARES	Other	No		PATIENT REASSURED	EFV	MGT OF HIV	600MG	ORAL		OI PROPHYLAXIS, MGT OF HIV
34	F	51	DIZZINESS, NIGHTMARES	Other	No		PATIENT REASSURED	EFV/3TC/TDF	MGT OF HIV	600MG	ORAL		OI PROPHYLAXIS, MGT OF HIV
25	M	52	DIZZINESS, STRANGE DREAMS	Other	No		PATIENT REASSURED	EFV	MGT OF HIV	600MG	ORAL		OI PROPHYLAXIS, MGT OF HIV
39	F	73	ITCHING, RASHES	Recovered fully	No		COTRIMOXAZOLE WAS SUSPENDED	CTX	O I PROPHYLAXIS		ORAL		MGT OF HIV
70	M	49	ITCHING, RASHES	Recovered fully	No		COTRIMOXAZOLE WAS SUSPENDED	CTX	O I PROPHYLAXIS	960MG	ORAL		MGT OF HIV
38	F	72	PRURITIS, BOILS ON THE RIGHT THIGH	Recovered fully	No		CTX	CTX	O I PROPHYLAXIS	960MG	ORAL		MGT OF HIV
25	F	46	DIZZINESS, HEADACHE	Recovered fully	No		PATIENT REASSURED	EFV	MGT OF HIV	600MG	ORAL		MGT OF HIV
42	M	59	DIZZINESS, NIGHTMARES	Recovered fully	No		PATIENT REASSURED	CTX	MGT OF HIV	600MG	ORAL		OI PROPHYLAXIS, MGT OF HIV
40	F	62	PRURITIS, BOILS ON THE RIGHT THIGHT	Recovered fully	No		PATIENT REASSURED	CTX	O I PROPHYLAXIS	960MG	ORAL		MGT OF HIV
32	F	67	SOMNOLENCE, DARK SKIN	Other	No		SEPTRIN WAS IMMEDIATELY DISCONTINUED	CTX	O I PROPHYLAXIS	960MG	ORAL		MGT OF HIV
38	M	72	DIZZINESS	Other	No		PATIENT REASSURED	CTX	MGT OF HIV	960MG	ORAL		MGT OF HIV
28	F	52	SOMNOLENCE, DIZZINESS	Other	No		PATIENT REASSURED	CTX	MGT OF HIV	600MG	ORAL		OI PROPHYLAXIS, MGT OF HIV
30	F	80	POLYPHASIA	Other	No		PATIENT REASSURED	CTX	MGT OF HIV	300MG	ORAL		OI PROPHYLAXIS, MGT OF HIV
33	F	62	RASHES, PRURITIS	Other	No		COTRIMOXAZOLE WAS SUSPENDED	CTX	O I PROPHYLAXIS	960MG	ORAL		MGT OF HIV
23	F	50	SOMNOLENCE, DROWSINESS	Other	No		PATIENT REASSURED	CTX	MGT OF HIV	600MG	ORAL		MGT OF HIV
30	F	39	DIZZINESS, NIGHTMARES	Other	No		PATIENT REASSURED	CTX	O I PROPHYLAXIS	600MG	ORAL		MGT OF HIV
37	M	53	LOSS OF HEARING	Other	No	No	ALTERNATE DAYS FOR INJ KANAMYCIN	KANAMYCIN INJ	TREATMENT OF MDR-TB	1000MG	IM		MDR-TB THERAPY
63	F	47	PRURITIS, RASHES	Recovered fully	No	No	SKINEAL OINTMENT, TAB LORATADINE	EFV	TREATMENT OF MDR-TB	600/300/300	ORAL	960MG	OI PROPHYLAXIS, MGT OF HIV
79	F	70	CATARRAH, COUGH, BODY ACHES, JOINT PAIN, RIGHT LEG PAIN	Other	No	No	TAB DICLOFENAC	LAM/ZIDO	ANTIRETROVIRAL THERAPY		ORAL
23	F	52	BOIL LIKE RASHES	Recovered fully	No	No	SEPTRIN WAS IMMEDIATELY DISCONTINUED	CTX	PREVENTION OF O I	960MG	ORAL		ANTI-RETROVIRAL THERAPY
17	F	57	VOMITING, BODY WEAKNESS	Recovered fully	No	No	TAB MAXOLONE	PYRAZINAMIDE	TREATMENT OF MDR-TB		ORAL		MDR-TB THERAPY
25	F	41	RASHES	Other	No	No		TDF/3TC/EFV	HIV/AIDS	600/300/300	P O		OI PROPHYLAXIS, MGT OF HIV
6	F	21	FEVER	Other	No	No		AZT/3TC/NVP	HIV/AIDS		P O		OI PROPHYLAXIS, MGT OF HIV
5	F	15	BODY RASHES	Recovered fully	No	No		AZT/3TC/NVP	HIV/AIDS		P O		OI PROPHYLAXIS, MGT OF HIV
25	F	41	BODY RASHES	Other	No	No		AZT/3TC/NVP	HIV/AIDS		P O		OI PROPHYLAXIS, MGT OF HIV
30	M	69	ABDOMINAL PAIN	Other	No	No		AZT/3TC/NVP	HIV/AIDS		P O	960MG	OI PROPHYLAXIS, MGT OF HIV
22	F	38	BODY WEAKNESS	Other	No	No		AZT/3TC/NVP	HIV/AIDS		P O		OI PROPHYLAXIS, MGT OF HIV
47	F	54	FEVER	Other	No	No		TDF/3TC/EFV	HIV/AIDS		P O		OI PROPHYLAXIS, MGT OF HIV
7	M	21	ABDOMINAL PAIN			No	BUSCOPAM TABS,MULTIVITAMIN	AZT,3TC,NVP	HIV/AIDS	300/300/200	P.O	960MG	PROPHYLAXIS
43	F	61	RASHES	Other	No	No		TENOFOVIR	ART	600/300/300	ORAL
33	F	58	DIZZINESS, GENERAL BODY WEAKNESS	Recovered fully	No	No		TENOVIR/LAM(EFV)	ART	600/300/300	ORAL
53	F	54	RASHES	Other	No	No		AZT/3TC/NVP	ART	600/300/300	ORAL	BD	2016-04-11
34	F	65	BODY WEAKNESS, FATIGUE	Other	No	No		TENOVIR/LAM(EFV)	ART	600/300/300	ORAL		ANALGESIC
244/89	F	30	NIGHTMARES	Other	No			TENOVIR/LAM(EFV)	ART TREATMENT	600/300/300	ORAL
30	M	58	FREQUENT STOOLING OVER NIGHT, DIZZINESS	Recovered fully	No		CAP LOPERAMIDE/TINDAZOLE, ORS	TENOFOVIR	ART	600/300/300	ORAL	960MG	OI PROPHYLAXIS, MGT OF HIV
25	M	5.7	ANAEMIA	Recovered fully	Yes	Yes	BLOOD TRANSFUSION	ZDV/3TC	ART	960MG	ORAL	7.5	ANTI-RETROVIRAL THERAPY
29		64	MALAISE, VOMITING	Recovered fully	No	No	CHANGED REGIMEN TO PALAXIN	TAB AL4	ANTIMALARIA		ORAL	1G DAILY	PAIN RELIEF
48	M		BODY WEAKNESS	Recovered fully	No	No	COUNSELLED	TDF/3TC/EFV	HIV/AIDS	T NOCTE	ORAL	960MG	PROPHYLAXIS
24	F	52	GENERAL BODY WEAKNESS	Recovered fully	No	No	CHANGE REGIMEN TO P-ALAXIN	ARTEMETER	ANTIRETROVIRAL THERAPY		ORAL		PAIN RELIEF
35	F	60	DIZZINESS	Recovered fully	No	No	COUNSELLED	AL4	ANTIMALARIA		ORAL	1G B.D	PAIN RELIEF
45	F	60	MILD RASHES ON THE CHEEKS	Other	No	No	COUNSELLED	TDF/3TC/EFV	HIV/AIDS		ORAL	960MG	OI PROPHYLAXIS, MGT OF HIV
66	F	58	INCREASE BODY TEMPERATURE	Recovered fully	No	No	CHANGED REGIMENT TO P-ALAXIN	ARTEMETER	ANTIMALARIA		ORAL		PAIN RELIEF
2	F	13.5	VOMITING	Recovered fully	No	No	ARTEMETHER INJ	ARTEM+LUM SYR					PAIN RELIEF/ ANTIBIOTIC
53	F	56	INCREASE IN BODY TEMPERATURE	Other	No	No	COUNSELLED	TDF/3TC/EFV	HIV/AIDS	T NOCTE	ORAL	960MG	OI PROPHYLAXIS, MGT OF HIV
35	F	44	PRURITIS, INFLAMMATION	Recovered fully	No	No	PIRITON TAB, CTX	CO-TRIMOXAZOLE	OPPORENISTIC		ORAL
44	M	67	PRURITIS, RASHES OVER THE SKIN	Recovered fully	No	No	ANTI-HISTAMINE, FLUCONAZOLE AND COUNCELLING	TENOFOVIR	ANTIRETROVIRAL THERAPY	T B.D	ORAL		OI PROPHYLAXIS, MGT OF HIV
42	F	37	BODY WEAKNESS	Recovered fully	No	No		CO-AMOXICLAR	SWELLING/BOILS		ORAL		APPETITE STIMULAR, O I PROPHELAXIS
45	M	50	FAT ACCUMULATION IN THE BREAST	Recovered fully	No	No	REFEREED TO SEE DOCTOR	TDF/3TC/EFV	ANTIRETROVIRAL THERAPY	T NOCTE	ORAL		OI PROPHYLAXIS, MGT OF HIV
30	F	46	LUMP,TENDERNESS IN THE BREAST	Recovered fully	No	No	CAP AMOXIL, TAB LEXOTAN	TDF/3TC/EFV	ANTIRETROVIRAL THERAPY	T NOCTE	ORAL		OI PROPHYLAXIS, MGT OF HIV
37	F	70	INSOMNIA	Other	No				PTB		ORAL
33	M	42	BLOODY STAIN	Recovered fully	No		VIT K TAB	RHZE	PTB		ORAL
42	M	38	INSOMNIA, LOSS OF APPETITE	Other	No			RHZE	PTB		ORAL
18	F	39	INTENSED LEG PAIN	Other	No		PCM	RHZE	PTB		ORAL
75	F	61	CONSTIPATION	Other	No		ADVISED TO STOP TAKEN FOOD THAT ARE RICH IN FEBRE	RHZE	PTB		ORAL
75	M	61	GENERAL BODY WEAKNESS	Life Threatening	No			RHZE	PTB		ORAL
64	M	64	LEG SWELLING	Other	No			RHZE	PTB		ORAL
24	F	60	LIGHT HEADEDNESS, WEAKNESS	Recovered fully	No				ART	600/300/300	ORAL
59	F	58	FATIGUE	Other	No				ART	600/300/300	ORAL	300MG	PROPHYLAXIS
34	M	84	RESTLESSNESS, DEPRESSION	Other	No				PMTCT	600/300/300	EI51677		PROPHYLAXIS
2	M	11	TREMOR	Recovered fully	No	No		CHLOROQUINE	ANTI MALARIA		ORAL
37	F	44	SLEEP DISORDERS, RESTLESSNESS		No	No	DRUG WITHDRAWN	TDF/3TC/EFV	RVD	T NOCTE	ORAL	960MG	OI PROPHYLAXIS, MGT OF HIV
11	M			Recovered fully	Yes				ANTIMALARIA		ORAL	750MG	ANTI-RETROVIRAL THERAPY
	F		PERIPHERAL NEURITIS	Recovered with disability	No		DISCONTINUED	3TC/AZT/NVP	RVD		ORAL
49	M		SEVERE HEADACHE, NIGHTMARES		No	No	STOP COMBIPAC	EFV/3TC/TDF	RVD	600MG	ORAL
67	M			Recovered fully	No		DRUG WITHDRAWN	ABC/AZT/EFV	RVD		ORAL
42	M		RASHES ALL OVER BODY		No		HYDROCORTISON INJECTION	ALLUVIR	ART		ORAL
28	F		RASHES ALL OVER THE BODY, DIZZINESS, FATIGUE					EFV/3TC/TDF	ART	300MG	ORAL	1TAB
46	F		SWOLLEN LEGS		Yes			ABC/AZT/EFV			ORAL
63	F		INSOMNIA	Recovered fully	No			EFV/3TC/TDF	ART	600/300/300	ORAL
35			IRRATIONAL SPEECH AND BEHAVIOUR	Other	No		SWITCH TO TDF/3TC/EFV	TDF/3TC/EFV	HAART	600/300/300	ORAL
30	F		ORAL THRUSH, LOSS OF APPETITE, DIARRHOAE, FEVER		No				HIV/AIDS	1 TAB DAILY	ORAL
50	F		NAILS COLOURATION		No				HIV	TWICE DAILY	ORAL
	F		PERSISTENT DIARRHOAE, VOMITING		No				HIV/AIDS	TWICE DAILY	ORAL
52	F	55	BODY RASH, PRURITIS		No				HIV/AIDS	ONCE DAILY	ORAL
28	F		ORAL THRUSH, DIARRHOAE,		No				HIV/AIDS	TWICE DAILY	ORAL		ANTI-RETROVIRAL THERAPY
28	F	35.3	SEVERE SKIN RASHES	Recovered fully	No	No	TAB PIRITON, TAB LORATADINE,	TDF/3TC/EFV	ART	600/300/300	ORAL	960MG	OI PROPHYLAXIS, MGT OF HIV
23	F		SKIN RASHES, PRURITIS	Recovered fully	No	No	EPIDERM CREAM	TDF/3TC/EFV	ART	600/300/300	ORAL	960MG	PROPHYLAXIS
23	M	62.7	HALLUCINATION, FATIGUE, DROWSINESS, SKIN RASHES	Recovered fully	No	No	COUNSELLED	TDF/3TC/EFV	ART	600/300/300	ORAL	960MG	OI PROPHYLAXIS, MGT OF HIV
39	F	93.5	DROWSINESS, DIZZINESS	Recovered fully	No	No	COUNSELLED	TDF/3TC/EFV	ART	600/300/300	ORAL	940MG	OI PROPHYLAXIS, MGT OF HIV
52	F		PRURITIC RASHES	Recovered fully	No	No		TDF/3TC/EFV	ART	600/300/300	ORAL	960MG	OI PROPHYLAXIS, MGT OF HIV
56	F		POLYUREA, POLYPHAGIA	Recovered fully	No	No	FBS TEST, COUNELLING	TDF/3TC/EFV	ART	600/300/300	ORAL	960MG	OI PROPHYLAXIS, MGT OF HIV
35	F		ANAEMIA, SKIN RASHES, VISUAL BLURRING	Recovered fully	No	No	CHANGE OF MEDICATION TO 3TC/TDF/EFV	AZT/3TC/NVP	ART		ORAL	960MG	OI PROPHYLAXIS, MGT OF HIV
41	M	72	PRURITIS	Recovered fully	No		TABS LORATIDINE 10MG	SULPHADINE	MALARIA		ORAL
32		85	DROWSINESS	Recovered fully	No		COUNSELLED		MALARIA	600/300/300	ORAL
35	M	80	NAUSEA	Recovered fully	No		COUNSELLED	ARTERSUNATE	MALARIA	50MG	ORAL
29	M	75	KNEE PAIN	Recovered fully	No		TABS PCM	ARTEMETER	MALARIA		ORAL		VITAMIN REPLENISHMENT
3	M	14	COUGH	Recovered fully	No		SYRUP COFLEN	ARTEMETER	PLASMODIASIS	20MG	ORAL
49	F	82	TINNITUS	Recovered fully	No		COUNSELLED	ARTEMETER	PLASMODIASIS		ORAL		FEVER
28	M	68	TINGLING SENSATION OF THE HANDS	Recovered fully	No		COUNSELLED	ARTEMETER	MALARIA		ORAL	750MG	FEVER
45	M	81	GENERAL BODY WEAKNESS	Recovered fully	No			ARTEMETER	PLASMODIASIS		ORAL
50	M	86	PAIN	Recovered fully	No		COUNSELLED	ARTEMETER	MALARIA		ORAL
36	M	81	COUGH	Recovered fully	No		SYRUP COFLEN	ARTEMETER	MALARIA		ORAL
35	M	60	ABDOMINAL PAIN	Recovered fully	No			ARTERSUNATE	MALARIA		ORAL		TINGLING SENSATION
60	M	75	TINNITUS	Recovered fully	No			ARTEMETER	MALARIA	T B.D	ORAL		HEADACHE, FEVER
41	M	59	REDDISH EYE	Recovered fully	No		VISINE EYE DROP	ARTEMETER	MALARIA	T B.D	ORAL
50	F	75	DIZZINESS,	Recovered fully	No			ARTEMETER	MALARIA		IV
35	M	85	PARAESTHESIA ON THE LEG	Recovered fully	No		TAB MULTIVITE	SULPHADINE	MALARIA		ORAL
21	F	52	DIZZINESS, FALLING DOWN, RASHES ON NECK	Other	No		COUNSELLED	TENO/LAMI/EFV	HIV/AIDS	600/300/300	ORAL
15/06/1982	F	28	DIARRHOEA, NAUSEA, BODY WEAKNESS	Recovered fully	No		FLUCONAZOLE WITHDRAWN	FLUCONAZOLE	ORAL THRUSH	200MG	ORAL
31/11/1960	F	60	GENERAL BODY PRURITIS	Recovered fully	No		LORATIDINE TABS	LAMIVUDINE/NVP/ ZDV	HIV/AIDS	150/300/200MG	ORAL	960MG	PROPHYLAXIS
45	F	65	WEIGHT LOSS, FEELING HOT FROM WITHIN, FEVER	Other	No		PATIENT HAS DEFAULTED FROM TREATMMENT FOR TWO YEARS AND JUST RETURNED TO TREATMENT	TENO/LAMI/EFV	HIV/AIDS	600/300/300	ORAL	960MG	OI PROPHYLAXIS, MGT OF HIV
35	F	78	SKIN DARKENING ON ARM AND LEG, STEVEN JOHNSON SYNDROME	Other	No		PATIENT WAS ASKED TO RETURN NEXT DAY FOR FULL ASSESSMENT BUT YET TO RETURN TO CLINIC	CTX	PROPHYLAXIS	960MG	ORAL	300/300/600	HIV
	F		DIAHOERRIA, VOMITING	Recovered fully	No		IVF RINGES	CEFOTAXIME	GASTROENTEROTIS	500MG	INTRAMUSCULAR (IM)		UTI, DIARRHOEA, MALARIA
25	F	70	SHIVERING, DIZZINESS, NAUSEA	Recovered fully	No		DISCONTINUED INJ	PENTAZOCINE INJ B P	ACUTE PAIN	30MG	INTRAMUSCULAR (IM)		ABDOMINAL CRAMPS, FLANK PAINS
40	F	86	PRURITIS, HOT FLUSH ON THE SKIN	Recovered fully	No		INJECTION METOCLOPROMIDE 10MG STAT	INJECTION CIPROFLATACIN	TYPHOID	200MG	INTRAMUSCULAR (IM)		ABDOMINAL CRAMPS, FLANK PAINS
56	F	65	PUFFY FACE, SWOLLEN EYE LIDS	Recovered fully	No		HYDROCORTISON, PREDNISOLINE, PROMETHEZINE	IBUPROFEN	PAINS		ORAL		OI PROPHYLAXIS, MGT OF HIV
28	F	55	WEAKNESS, JOINT PAIN, HEADACHE, SYNCOPE	Recovered fully	No		STOPPED MEDICATION	ARTEMETER	ANTIMALARIA		ORAL		TYPHOID, PAINS
31	M	60	WEAKNESS, JOINT PAIN		No	No	CONTINUE INJ	KANAMYCINE	MDRTB		INTRAMUSCULAR (IM)		PTB
21	M	62	HUNGER	Recovered fully	No	No	CONTINUE INJ	KANAMYCIN INJ	MDRTB		INTRAMUSCULAR (IM)		MDR-TB THERAPY
18	F	57	VOMITING, NAUSEA, EXCESSIVE SALIVATION	Recovered fully	No	No	AVOMINE, PYRIDOZINE	KANAMYCIN INJ	MDRTB		INTRAMUSCULAR (IM)		MDR-TB THERAPY
42	F	74	NAUSEA, SEVERE VOMITING, RASHES	Recovered fully	Yes	No	IVF DEXTROSESALINE, PIRITON	ARTEMETER	ANTIRETROVIRAL THERAPY	160MG	INTRAMUSCULAR (IM)		TYPHOID, PAIN, HEADACHE
31	M	60	TINNITUS, DIZZINESS	Recovered fully	No	No	CONTINUE INJ	KANAMYCIN INJ	MDRTB		INTRAMUSCULAR (IM)		PTB
65	F	43	SEVERE LOW BACKPAIN	Recovered fully	No	No	IBUPROFEN TAB	ANTIKOCH'S	EPTB		ORAL		HAEMATENIC
69	M	54	JOINT PAIN	Recovered fully	No	No	IBUPROFEN TAB	ANTIKOCH'S	EPTB		ORAL		HAEMATENIC, PAIN
56	F	60	WAIST PAIN, URINE DISCOLOURATION	Recovered fully	No	No	PCM	ANTIKOCH'S	EPTB		ORAL		HAEMATENIC, PAIN
33	F	68	RASES,BLOOD STAIN SPUTUM	Recovered fully	No	No	PIRITON	COMBIPAK	PTB	R6	ORAL	R6	ITCHING
82	F	68	FEVER, WEAKNESS , LOSS OF APPETITE	Recovered fully	No	No	MALARIA TREATED, FAMILY COUNSELLED ON DIET	COMBIPAK	PTB	R6	ORAL	4BD	MALARIA
28	M	70	PALOR, DIZZINESS	Recovered fully	No	No	REASSURED HAEMATINICS	COMBIPAK	PTB	R6	ORAL	1TDB,1BD	ANAEMDA, ANAEMDA
77	M	72	SWOLLEN LIPS	Recovered fully	No	No	PIRITON	ACYCLOVIR	STI	400MG	ORAL	100MGBD 3TIMES IN A WEEK	PAINS
11	M	31	BREATHLESSNESS,HEADACHE	Recovered fully	No	No	DISCONTINUATION OF DRUG	COUGH EXPECTOFANT	URTI	10MLS	ORAL	500MGTDS 5TIMES IN A WEEK,100MG TDS 3TIMES IN A WEEK	URTI,URTI/PAINS
58	F	72	PRURITIS	Recovered fully	No	No	PIRITON	IBUPROFEN	PAINS AND FEVER	400MG TDS	ORAL	4BD	MALARIA,ANAEMIA
31	F		FREQUENT HADACHE, WAIST PAIN, BACKACHE	Other	No			ETONGESTREL
35	F	38	GENERAL BODY WEAKNESS, CAN'T WALK FAR DISTANCE	Life Threatening	Yes	Yes	DRUG WITHDRAWN	ZDV/LAMI	30/10/2016	TWICE DAILY	ORAL	1CAP	ANAEMIA
42	M	69	PAIN ON THE RIGHT PART OF HIS CHEST, COUGHING WITH BLOOD	Life Threatening	Yes		DRUG WITHDRAWN			1G	IV
32	F	47	GEN WEAKNESS OF THE BODY, DIZZINESS, COUGHING AT NIGHT	Other	Yes		DRUG WAS STOPPED	LAM/ZDV/EFV	ART		ORAL
33	F	65	EARLY MORNING FACIAL SWELLING, BODY WEAKNESS, FEELING SENSATION ALL OVER BODY	Life Threatening	Yes		DRUG TRANSFERRED AND TDF WAS WITHDRAWN	LAM/ZDV/EFV	ART	1 TAB DAILY	ORAL
23		58	BACKACHE, GEN BODY PAIN, TIREDNESS, JOINT PAINS AND COLD	Other	No		TABS ACT	TENO/LAMI/EFV	ART	600/300/300	ORAL	960MG	OI PROPHYLAXIS, MGT OF HIV
32	F	61	FAINTING SPELLS, DIZZINESS, HEADACHE, HYPOTENSION		No		DOUBLE DOSE HAEMATENICS ZD FOLIC ACID	LAMIVUDINE/ZIDOVUDINE/NVP	ART	150/200/300	ORAL
28	F	64	SKIN PRURITIS, ITCHING, RASHES, BODY WEAKNESS, FATIQUE	Recovered fully	No		TAB PCM, HAEMATININCS	ZDV/LAMI	ART	300/300/200	ORAL	960MG	OI PROPHYLAXIS, MGT OF HIV
21	M	50	RESTLESSNESS, WEAKNESS OF THE BODY	Recovered fully	No		BLOOD CAPS DAILY, VIT B COMPLEX 2DAILY, BC	TENO/LAMI/EFV	ART	600/300/300	ORAL	960MG	OI PROPHYLAXIS, MGT OF HIV
37	F	74	BLURRED VISION, INSOMNIA, HEADACHE, LOSS OF APPETITE, BODY WEAKNESS	Recovered fully	No	No		EFV/3TC/TDF	ART	600/300/300	ORAL	960MG	OI PROPHYLAXIS, MGT OF HIV
38	F	80	SEVERE HEADACHE, FEVER	Recovered fully	No	No	TAB ACT, PCM, HAEMATINICS/BLOOD TONIC	EFV/LAM/TENOFOVIR	ART	600/300/300	ORAL	960MG	OI PROPHYLAXIS, MGT OF HIV
	M	78	HEADACHE, NAUSEA, RESTLESSNESS, INABILITY TO READ OR CONCENTRATE	Recovered fully	No	No	COUNSELLED	TDF, 3TC, EFV	ART	600/300/300	ORAL
23	F	58	NAUSEA, VOMITING, LOSS OF APPETITE, RASHES, SKIN ERUPTIONS, SWOLLEN EAR/LIPS/EYS/FACE, HEADACHE	Other	No		DRUG WITHDRAWN	3TC, NVP, AZT	ART	150/300/200MG	ORAL
47	M	77	PRURITIS, REDDISH AND PEPPERISH FEELING AROUND THE MALE GENITALS,	Recovered fully	No		CTX WAS STOOPED	CTX	ART-OI PROPHYLAXIS	960MG	ORAL	300/300/600	ART
40	F	68	TIREDNESS, FAINTING SPELLS, GENERAL BODY WEAKNESS, HEADACHE, COUGH, CHEST PAIN	Recovered fully	No		BLOOD TONIC, TABS PCM, ACT	EFV/3TC/TDF	ARV	300/300/600	ORAL
1	F	9	WEIGHT LOSS, SKIN PRURITIS, PRURITIS, NO APPETITE, COUGH, WEAKNESS	Recovered fully	No		ACTION MEAL, HAEMATINICS,	3TC, TDF, EFV	ART		ORAL		OI PROPHYLAXIS, MGT OF HIV
3	M	15	SEVERE ANAEMIA, WEIGHT LOSS, COUGH, GENERAL BODY WEAKNESS, LOSS OF APPETITE, JAUNDICE	Recovered fully	No		DRUG SWITCH TO ABC/3TC/EFV, BLOOD TONIC, ACTION MEAL	COMBIPARK	ART		ORAL		OI PROPHYLAXIS, MGT OF HIV
30	F	60	FEELING OF FAINTING, GENERAL WEAKNESS		No			AZT/3TC/EFV	HIV/AIDS		ORAL
1	M	8	RASHES	Recovered fully	No	No		ARTEMETER	MALARIA		ORAL
32	F	45	DIZZINESS, SOMNOLENCE	Other	No		REASSURANCE AND COUNSELLED	EFV/3TC/TDF	MGT OF HIV	600MG	ORAL		OI PROPHYLAXIS, MGT OF HIV
30	F	56	NIGHTMARES, SEVERE HEADACHE	Other	No		REASSURANCE AND COUNSELLED	EFV/3TC/TDF	MGT OF HIV	600MG	ORAL		MGT OF HIV
50	F	50	DIZZINESS, NIGHTMARES	Other	No		REASSURANCE AND COUNSELLED	EFV	MGT OF HIV	600MG	ORAL		MGT OF HIV
30	M	70	DIZZINESS, NIGHTMARES	Recovered fully	No		PATIENT REASSURED	EFV/3TC/TDF	MGT OF HIV	600MG	ORAL		OI PROPHYLAXIS, MGT OF HIV
40	F	67	DIZZINESS, SOMNOLENCE	Recovered fully	No		PATIENT REASSURED	EFV/3TC/TDF	MGT OF HIV	600MG	ORAL		OI PROPHYLAXIS, MGT OF HIV
55	F	54	GEN BODY WEAKNESS,	Recovered fully	No	No	PATIENT REASSURED AND MULTIVITE GIVEN	NVP	MGT OF HIV	200MG	ORAL		OI PROPHYLAXIS, MGT OF HIV
36		63	GEN BODY WEAKNESS, NIGHTMARES	Recovered fully	No		PATIENT REASSURED	EFV	MGT OF HIV	600MG	ORAL		OI PROPHYLAXIS, MGT OF HIV
25		60	DIZZINESS	Other	No		PATIENT REASSURED	EFV/3TC/TDF	MGT OF HIV	600MG	ORAL		OI PROPHYLAXIS, MGT OF HIV
60	F	71	GENERAL BODY WEAKNESS, NIGHTMARES, INSOMNIA, FREQUENT URINATION	Recovered fully	No		PATIENT REASSURED	EFV	MGT OF HIV	600MG	ORAL		OI PROPHYLAXIS, MGT OF HIV
35	F	47	DIZZINESS, NIGHTMARES	Recovered fully	No		PATIENT REASSURED	EFV	MGT OF HIV	600MG	ORAL		OI PROPHYLAXIS, MGT OF HIV
27	F	49	GENERAL BODY WEAKNESS, NIGHTMARES	Recovered fully	No		PATIENT REASSURED	EFV	MGT OF HIV	600MG	ORAL		OI PROPHYLAXIS, MGT OF HIV
40	M	78	NIGHTMARES	Recovered fully	No		PATIENT REASSURED	EFV	MGT OF HIV	600MG	ORAL		OI PROPHYLAXIS, MGT OF HIV
40	F	51	PRURITIS, RASHES ALL OVER THE BODY	Recovered fully	No		SEPTRIN WAS IMMEDIATELY DISCONTINUED	CTX	O I PROPHYLAXIS	960MG	ORAL		OI PROPHYLAXIS, MGT OF HIV
25	F	62	DIZZINESS, GENERAL BODY WEAKNESS	Other	No		PATIENT REASSURED	EFV	HIV/AIDS	600MG	ORAL		OI PROPHYLAXIS, MGT OF HIV
25	F	62	PRURITIS	Other	No		CTX WAS STOOPED	CTX	O I PROPHYLAXIS	960MG	ORAL		OI PROPHYLAXIS, MGT OF HIV
35	F	43	RASHES , INSOMNIA	Recovered fully	No	No	COTRIMOXAZOLE WAS STOPPED IMEEDIATELY	COTRIMOXAZOLE	O.I PROPHYLAXIS	960MG	ORAL	600MG/300MG/300MG	MGT OF HIV, IPT,MGT OF HIV
32	F	43	DIZZINESS,SOMNOLENCE	Other	No	No	PATIENT WAS REASSURED	EFAVIRENZ	MGT OF HIV	600MG	ORAL	300MG,300MG,300MG	IPT,MGT OF HIV,MGT OF HIV
44	M	77	NIGHTMARES	Recovered fully	No	No	PATIENT WAS REASSURED	EFAVIRENZ	MGT OF HIV	600MG	ORAL	300MG,300MG , 960MG	MGT OF HIV,MGT OF HIV,O.I PROPHYLAXIS
40	F	51	DIZZINESS	Recovered fully	No	No	REASSURED PATIENT ON THE SIDE EFFECTS	EFAVIRENZ	MGT OF HIV	600MG	ORAL	300MG,300MG,960MG	MGT OF HIV,MGT OF HIV. O.I PROPHYLAXIS
25	M	55	NIGHTMARES,DIZZINESS,SOMNOLENCE	Recovered fully	No	No	PATIENT WAS REASSURED	EFAVIRENZ	MGT. OF HIV	600MG	ORAL	300MG, 300MG ,960MG	MGT. OF HIV, MGT. OF HIV,O.I PROPHYLAXIS
23	F	62	DIZZINESS,HOTNESS OF THE STOMACH	Recovered fully	No	No	PATIENT WAS REASSURED	EFAVIRENZ	MGT OF HIV	600MG	ORAL	960MG , 300MG ,300MG	MGT OF HIV, MGT OF HIV
39	F		HEADACHE, BODY PAINS, WAIST PAIN, PRURITIS	Recovered fully	No		WITHDROWAL OF ATRIPLA	3TC, TDF, EFV	ARV		ORAL
28	F		DIZZINESS, RASHES	Recovered fully	No		PATIENT WITHDROWNED FROM ATRIPLA	3TC, TDF, EFV	ARV		ORAL
42	M		VOMITING, DIZZINESS	Recovered fully	No			TDF/3TC/EFV	ARV	OD NOCTE	ORAL	OD	OI PROPHYLAXIS, MGT OF HIV
52	F	69.6	DIZZINESS, WAIST PAIN	Recovered fully	No			TDF/3TC/EFV	ARV	OD NOCTE	ORAL	OD	OI PROPHYLAXIS, MGT OF HIV
41	M	N	PRURITIS, RASH	Recovered fully	No		CTX, TAB PREDNISOLONE	CTX		960MG	ORAL
31	F		SEVERE PRURITIS, RASHES	Other	No		TAB PIRITON	TDF/3TC/EFV	ARV
35	F		PRURITIC RASH	Other	No		TAB LORATADINE 10MG DAILY	ARTEMETER	ANTIMALARIA		P O		ANALGESIC
21	F	48	RASHES, PRURITIS, SKIN ERUPTIONS		No		DRUG WITHDRAWN	ISONIAZIDE	IPT	300MG	P O		ANTI-RETROVIRAL THERAPY
45	F		BURNING SENSATION IN THE STOMACH, BELCHING		No		DISCONTINUED	FOLIC ACID	HEMATINIC		P O	200MG	HAEMATENIC
31	F	58	SKIN DISCOLOURATION, PINKISH LIPS AND NAILS		No		DISCONTINUED, CHANGED TO TDF/3TC/EFV	ZDV/3TC	ANTIRETROVIRAL THERAPY		P O	960MG	OI PROPHYLAXIS, MGT OF HIV
31	M	45	LOSS APPETITE,NIGHT MARES,INSOMNIA	Other	No	No	VITAMIN B.CO,INTRAVENOUS FLUID	EFAVIRENZ	HIV INFECTION	500MG	ORAL	300MG,960MG	O.I PROPHYLAXUS
30	M	35	FEVER,VOMITING,GENERALIZED BODY PRURITIS	Recovered fully	No	No	TAB LORATIDINE,PARACETAMOL	TENOFOVIR	HIV INFECTION	300MG	ORAL	300MG,600MG,960MG	HIV INFECTION
15	F	30	FEVER,DIZZINESS,COUGH,DYPSNIA	Recovered fully	Yes	No	TRANSFUSION,INTRAVENOUS FLUID,ANTIBIOTICS	LAMIVUDINE	HIV INFECTION	300MG	ORAL	300MG,200MG,960MG	HIV INFECTION
14	F	23	FEVER,GENERALIZED BODY PAIN	Other	Yes	No	ANTIBIOTICS,ANALGESTIC,ANTIHISTAMIN	EFAVIRENZ	HIV INFECTION	600MG	ORAL	300MG,960MG	HIV INFECTION
50	M	59	GENERAL BODY PRURITIS	Recovered fully	No	No		LAMVUDINE	HIV INFECTION	300MG	ORAL	600MG,300MG,960MG	HIV INFECTION
17	M	46	PEPPERY SENSATION OVER THE CHEST	Other	No	No	PIROXICAM	PIROXICAM CAPSULE	ABDOMINAL PAIN	200MG	ORAL	1TAB,200MG	ABDOMINAL PAIN
40	M	54	GENERALISED BODY PRURITIS, RASHES	Other	No	No	TAB LORATIDINE,CAP AMOXYL	AZT/3TC/NVP	HIV	300MG,200MG	ORAL	960MG	O.I PROPHYLAXUS
39	F	51	DIZZINESS	Other	No	No		EFV/3TC/TDF	HIV	1 AT NIGHT	ORAL	960MG	PROPHYLAXUS
38	F	48	TINGLING SENSATION	Other	No	No	TAB NEUROVITE FORTE	AZT/3TC/NVP	HIV	1 BD	ORAL	960MG	O.I PROPHYLAXUS
23	F	55	RASHES	Other	No	No	CAP AMOXILLINE AND LORATIDINE	AZT/3TC/NVP	HIV	1 BD	ORAL	960MG	PROPHYLAXIS
23	M	75	DIZZINESS	Recovered fully	No	No		EFAVIRENZ	HIV/AIDS	300MG,200MG,600MG	ORAL	960MG	PROPHYLAXUS
84	F		RESTLESSNESS,WEAKNESS	Recovered fully	No	No	HYDROCORTISONE	PENTAZOCINE	PAIN	30MG	IV
21	F		RESTLESSNESS,LOSS OF CONSCIOUSNESS	Recovered fully	No	No	HYDROCORTISONE	PENTAZOCINE	PAIN	30MG	IV	5MG	SEDATIVE
8	M	20	DYPSNIA,INSOMNIA, HIGH BODY TEMPERATURE	Recovered fully	No	No		CLAVULANATE,	RESPIRATORY INFECTION	3 BD	ORAL
73	M	78	WAIST PAIN,ACUTE ARTHRITIS	Other	No	No	TAB ANALGESTICS	RHZE	TB		ORAL
40	F	63	INSOMNIA	Other	No	No	DIAZEPAM TAB	COTRIMOXAZOLE	PROPLAXUS O.I	960MG	ORAL
42	M	62	INSOMNIA,HEADACHE	Recovered fully	No	No	TAB PARATACEMOL,DIAZEPAM	COTRIMOXAZOLE	PROPHYLAXIS	960MG	ORAL
25	F	65	SORES ON THE LIPS,RASHES ALL OVER THE BODY	Other	No	No	LORATIDINE,VITAMIN C,CALAMINE LOTION,PREDISOLONE	CIPROFLOXACIN	TYPHOID FEVER	500MG	ORAL	1 BD	PAIN
43	M	42	SEVERE BODY WEAKNESS,LEG SEWLLING	Other	No	No	MULTIVITAMIN	RHZE	TB	3 BD	ORAL
41	M	55	HEADACHE,OUGH,CHEST PAIN	Other	No	No	TAB AUGUMENTIN,PARACETAMOL,TAB LABIX	EFAVIRENZ	HIV/AIDS	300MG,600MG	ORAL	960MG	O.I PROPHYLAXUS
47	F	80	INSOMNIA,HEAVY FLOW OF MENSES,STRANGE MOVEMENT IN HE BODY	Other	No	No	TAB TRANEXAMINE,SYRUP CALOBECLE,TAB LEXOTAN	EFAVIRENZ	HIV/AIDS	300MG,600MG	ORAL	960MG,300MG	O.I PROPHYLAXUS
36	F	34	BODY WEAKNESS	Other	No	No		EFV/3TC/TDF	HIV/AIDS	600MG	ORAL	960MG	O.I PROPHYLAXUS
29	F	40	PAIN IN THE TWO ARMS,GENERALISED BODY PAIN,COUGH,CHILLS	Other	No	No	COUGH SYRUP	ZIDOVUDINE	HIV/AIDS	300MG	ORAL	960MG	PROPHYLAXUS
26	M	75	WEAKNESS, BODY PAIN,CHILLS	Other	No	No	TAB MULTIVITE,TAB COCODAMOL	EFAVIRENZ	HIV/AIDS	300MG	ORAL	960MG	O.I PROPHYLAXUS
28	F	47	CATTARRH,HEADACHE,PALPITATION,CHILL	Other	No	No	TAB PROPANOLOL,PARACETAMOL,TAB PIRITON	TDF/3TC/EFV	HIV/AIDS	300MG,600MG	ORAL	960MG	PROPHYLAXUS
43	M	57	STUFFY NOSE,BACK PAIN	Other	No	No	TAB VITAMIN C,TAB AUGMENTRIN	TENOFIVIR	HIV/AIDS	300MG,600MG	ORAL	960MG	O.I PROPHYLAXUS
27	M	57	LOOSE STOOL,INSOMNIA	Other	No	No	TAB ,ETRONIDAZOLE,TAB LEXOTAN	EFAVIRENZ	HIV/AIDS	300MG,600MG	ORAL	960MG,300MG,300MG	O.I PROPHYLAXUS
47	F	35	COUGH,CHILLS,BLOOD COMING OUT OF HER NOSE	Other	No	No	TAB CO-AMOXYL	EFAVIRENZ	HIV INFECTION	300MG	ORAL	960MG	O.I PROPHYLAXUS
42	M	65	PRURITIS,TEARS FROM THE EYES,COUGH	Other	No	No		TENOFOVIR	HIV/AIDS	300MG	ORAL	960MG	O.I PROPHYLAXUS
37	M	57	COUGH	Other	No	No	TAB AUGUMENTIN	EFAVIRENZ	HIV/AIDS	300MG	ORAL	960MG	O.I PROPHYLAXUS
59	F	58	PAIN, DIZZINESS	Other	No	No	TAB SEPTRIN,TAP PIROXICAM	TENOFOVIR	HIV/AIDS	300MG,600MG	ORAL	960MG	PROPHYLAXUS
25	F	62	DISCHARGE FROM THE VAGINA	Other	No	No	TAB FLUCONAZOLE	ZIDOVUDINE	HIV/AIDS	300MG	ORAL	960MG	O.I PROPHYLAXUS
22	F	39	LOOSE STOOL	Other	No	No	ZINC GLUCONATE	EFAVIRENZ	HIV/AIDS	300MG	ORAL
36	F	65	PARENTHESIS	Other	No	No	CAP RENTRVE,VITAMIN BCO	ZIDOVUDINE	HIV/AIDS	300MG,150MG,200MG	ORAL	960MG	O.I PROPHYLAXUS
9	M	23	INSOMNIA,LOSS OF APPETITE	Other	No	No	TAB CYPROHEPTADINE,TAB VITE	ZIDOVUDINE	HIV/AIDS	150MG750MG	ORAL	960MG	O.I PROPHYLAXUS
51	F	62	PRURITIS,FEVER	Other	No	No	TAB LORATIDINE,TAB PCM	EFAVIRENZ	HIV/AIDS	300MG	ORAL	960MG	PROPHYLAXUS
39	F	55	RASHES,PRURITIS	Other	No	No		TENOFOVIR	HIV/AIDS	300MG,600MG	ORAL	960MG	PROPHYLAXUS
46	M	75	THE PRIVATE PART IS SHOCKING,THE HANDS TOO ITCHES	Other	No	No		COTRIMOXAZOLE	PCP PROPHYLAXIS	960MG	ORAL
45	M	63	PRURITIS,RASHES,COUGHING	Other	No	No		EFAVIRENZ	HIV/AIDS	300MG,600MG	ORAL	960MG	O.I PROPHYLAXUS
42	M	58	INSOMNIA,PRURITIS	Other	No	No		EFAVIRENZ	HIV/AIDS	300MG,600MG	ORAL
30	F	42	SEEING DOUBLE,WEEKNESS	Other	No	No		EFAVIRENZ	HIV/AIDS	300MG,600MG	ORAL	960MG	PROPHYLAXUS
75	F	55	DIZZINESS,FEELING DRUNK	Other				EFAVIRENZ	HIV/AIDS	300MG	ORAL	960MG	PROPHYLAXUS
55	M	64	DIZZINESS	Recovered fully	No	No		COTRIMOXAZOLE	PROPLAXUS O.I	960MG	ORAL
22	F	30	PERSISTENT VOMITTING	Other	No	No	TAB MAXOLONE TAB	EFV/3TC/TDF	HIV	1 BD	ORAL	960MG	PROPHYLAXUS
42	F	50	RASHES,PRURITIS	Other	No	No		COTRIMOXAZOLE	PROPLAXUS O.I	960MG	ORAL
37	F	55	RASHES,FEVER,GENERALISED BODY PRURITIS	Recovered fully	No	No	TAB LORATIDINE,PARACETAMOL TAB,ON OBSERVATION	TDF/3TC/EFV	HIV/AIDS	1 BD	ORAL	960MG	PROPHYLAXUS
52	F	43	DIZZINESS,LOSS OF APPETITE,WEIGHT LOSS	Other	No	No	COUNSELLING	STOP TB KIT	MDR TB	1 BD	ORAL	960MG	O.I PROPHYLAXUS
35	F	49	EASY FATIGUE, ABILITY,BREATHLESSNESS	Other	No	No	COUNSELLING,TAB LISINOPRIL	EFV/3TC/TDF	HIV/AIDS	1 NOCTE	ORAL	960MG	O.I PROPHYLAXUS
28	F	101	HEADACHE, TINNITUS	Other	No	No	SHE WAS COUNSELLED AND REASSURE,PARACETAMOL	FLOXACIN	TREATMENT OF PELVIC INFLAMATORY DISEASE	200MG	ORAL	400MG,200MG	TREATMENT OF PVD
33	M	54	HYPOKALAEMIA	Recovered fully	No	No	IV POTASIUM CHLORIDE WAS ADMISTERED AND ENCOURAGE PATIENT TO EAT FRUITS LIKE BANANA AND GROUDNUT	CAPREOMYCIN	TREATMENT OF MDR TB	750MG	IM	750MG,500MG,1.5G	FOR TREAMENT OF MDR TB
16	F	46	GENERAL BODY WEAKNESS,LOSS OF APPETITE, HEADACHE	Other	No	No	DOLO-META B,WAS ADMISTERED AND PARACETAMOL	PYRAZINAMIDE	TREATMENT OF MDR TB	1.5G	ORAL	750MG,500MG,1.5G	FOR TREAMENT OF MDR TB
60	M	38	SEVERE HYPOKALAEMIA, DIZZINESS,INSOMNIA,HEADACHE, BLUR VISION	Recovered fully	No	No	IV KCL WAS ADMINISTERED	CAPREOMYCIN	TREATMENT OF MDR TB	750MG	ORAL	750MG,500MG,1.5G	FOR TREAMENT OF MDR TB
48	F	34	HYPOKALAEMIA	Other	No	No	IV POTASIUM CHLORIDE WAS ADMISTERED AND ENCOURAGE PATIENT TO EAT FRUITS LIKE BANANA AND GROUDNUT	CAPREOMYCIN	TREATMENT OF MDR TB	750MG	ORAL	750MG,500MG,1.5G	FOR TREAMENT OF MDR TB
54	M	71	RENAL IMPAIRMENT					TENOFOVIR	MANAGEMENT OF HIV	300MG	ORAL	96MG,300MG,600MG	MANAGEMENT OF HIV
	F		RENAL IMPAIRMENT					TENOFOVIR	MANAGEMENT OF HIV	300MG DAILY	ORAL	300MG,960MG,600MG	MANAGEMENT OF HIV
54	F	54	RENAL IMPAIRMENT	Other	No	No		TEN/LAM/EFV	MANAGEMENT OF HIV	300MG	ORAL	960MG,300MG,600MG	MANAGEMENT OF HIV,O.I PROPHYLAXUS
28	F	49	RASHES,SKIN LESIONS,KIDNEY ABNORMALITY	Other	No	No		COTRIMOXAZOLE	PROPLAXUS FOR OPPORTUNISTIC INFECTION	960MG	ORAL	300MG,300MG,600MG	MANAGEMENT OF HIV
26	F		RENAL IMPAIRMENT	Other	No	No		CAPREOMYCIN	TREATMENT OF MDR TB	750MG	ORAL	750MG,500MG,1.5G	FOR TREAMENT OF MDR TB
35	F	70	HEADACHE	Other	No	No		ZIDOVUDINE	HIV/AIDS	300MG,150MG,200MG	ORAL	960MG	PROPHYLAXUS
59	F	51	DIZZINESS,STOMACH PAIN	Other	No	No		TENOFOVIR	HIV/AIDS	300MG,600MG	ORAL	960MG	PROPHYLAXUS
28	F	72	DIZZINESS, BODY SHAKING	Other			TAB FOLIC ACID,TAB FERROUS	ZIDOVUDINE	HIV/AIDS	300MG,150MG,200MG	ORAL	960MG	PROPHYLAXUS
31	F	55	MENSTRUAL IRREGULARITY	Other				ZIDOVUDINE	HIV/AIDS	300MG,150MG,200MG	ORAL
50	M	34	PRURITIS,LOSS OF APPETITE	Other	No	No	TAB LORATIDINE,CAP ASTYMIN	TENOFOVIR	HIV/AIDS	300MG,150MG,200MG	ORAL
46	M	69	INSOMNIA	Other	No	No	TAB LEXOTAN 1.5MG NOCTE	TENOFOVIR	HIV/AIDS	300MG,600MG	ORAL
42	M	50	SWELLING,PRURITUS	Recovered fully	No	No	TAB LAXIS,TAB LORATIDINE	TENOFOVIR	HIV/AIDS	300MG,600MG	ORAL	960MG	PROPHYLAXUS
46	M	65	INSOMNIA,CRAWLING SENSATION ON FOREHEAD,PAINS IN THE KNEE	Other	No	No	TAB CPE,TAB LEXOTAN,TAB VIT C	TENOFOVIR	HIV/AIDS	300MG	ORAL	100MG,100MG	HIV/AIDS
24	F	65	CHILLS,BITTER TASTE,MISSED PERIOD	Other				COTRIMOXAZOLE	PROPLAXUS O.I	960MG	ORAL
35	F	58	GENERALISED BODY PAINS,COUGH,COLD,HEADACHE,WAIST, BACK PAINS,FEVER	Other	No	No		ZIDOVUDINE	HIV/AIDS	300MG,150MG,200MG	ORAL	960MG	O.I PROPHYLAXUS
32	F	80	GENERALISED PRURITIS	Other	No	No	TAB PIRITON	TENOFOVIR	HIV/AIDS	300MG,600MG	ORAL	960MG	PROPHYLAXUS
34	F	50	SPONTANEOUS ABORTION	Recovered fully	No	No		EFAVIRENZ	HIV/AIDS	300MG	ORAL	960MG	PROPHYLAXUS
60	M	52	CONSTANT HEADACHE	Other	No	No		EFAVIRENZ	HIV/AIDS	300MG,600MG	ORAL	960MG	O.I PROPHYLAXUS
32	M	73	CHEST PAIN,DIFFICULTY BREATHING,CATTARRH	Other	No	No		EFAVIRENZ	HIV/AIDS	300MG,600MG	ORAL	960MG	PROPHYLAXUS
50	M	35	RASHES,PRURITIS,PAINS IN THE LEGS	Other	No	No		TENOFOVIR	HIV/AIDS	300MG,600MG	ORAL	960MG	O.I PROPHYLAXUS
44	M	59	PEDAL SWELLING PAIN	Other	No	No	TAB LAXIS,TAB IBRUPROFEN	TENOFOVIR	HIV/AIDS	300MG,600MG	ORAL	960MG	O.I PROPHYLAXUS
34	F	60	GENERALISED BODY PRURITIS,RASHES	Other	No	No		TENOFOVIR	HIV/AIDS	300MG,600MG	ORAL	960MG	PROPHYLAXUS
42	M	50	PEDAL EDEMA,PARASTHESIAS,FEVER		No	No	TAB LASIX,TAB MULTIVITE	EFAVIRENZ	HIV/AIDS	300MG,600MG	ORAL	960MG	PROPHYLAXUS
28	F	82	PROSTRATION,WEAKNESS,INSOMNIA,FEVER,BACK AND STOMACH PAIN,VOMITTING,CEASATION OF MENSES,BLURRED VISION	Other	No	No	TAB LEXOTAN	EFAVIRENZ	HIV/AIDS	300MG,600MG	ORAL	960MG	O.I PROPHYLAXUS
33	F	63	GENERALISED PRURITIS,RASHES ON THE BODY	Other	No	No		COTRIMOXAZOLE	PROPLAXUS O.I	960MG	ORAL	1G	HIV/AIDS
70	F	58	INSOMNIA	Other	No	No	TAB LEXOTAN 1.5MG NOCTE	ARTEMETER/LUMEFRADINE	MALARIA	400MG	ORAL	625MG,15ML	PROPHYLAXUS
43	F	62	PRURITIS,RASHES	Other	No	No	DEXAMETHAZONE,PIRITON TAB	COTRIMOXAZOLE	PROPLAXUS O.I	960MG	ORAL
58	F	51	GENERALISED PRURITIS ALL OVER THE BODY	Other	No	No		TENOFOVIR	HIV/AIDS	300MG,600MG	ORAL	960MG	PROPHYLAXUS
40	F	55	GENERALISED BODY PRURITIS	Other	No	No	TAB PIRITON,TAB DEXAMETHAZONE	EFAVIRENZ	HIV/AIDS	300MG,600MG	ORAL	960MG	O.I PROPHYLAXUS
30	F	58	LOW BACK PAIN,INTERNAL COLD	Recovered fully	No	No	PATIENT WAS COUNSELLED TO TAKE DRUG 960MG DAILY	COTRIMOXAZOLE	PROPLAXUS	960MG	ORAL
50	F	62	RASHES,PRURITIS	Other	No	No		COTRIMOXAZOLE	PROPLAXUS O.I	960MG	ORAL	300MG,300MG,600MG	HIV/AIDS
53	F	60	CHILLS,PALPITATIONS,LOSS OF APPETITE,GENERALIZED BODY PAINS,HEADACHE	Other	No	No		NEFEDIPINE	HYPERTENSION	20MG BD	ORAL	40MG,300MG,	HYPERTENSION,POOR SLEEP
25	F	52	DIZZINESS,NIGHTMARES	Other	No	No		EFAVIRENZ	HIV/AIDS	300MG,600MG	ORAL	960MG	PROPHYLAXUS
45	F	44	RASHES ON THE FACE,NECK, HANDS,PRURITIS	Other	No	No		TENOFOVIR	HIV/AIDS	300MG,600MG	ORAL	960MG	PROPHYLAXUS
50	F	80	GENERAL BURNING SENSATION ALL OVER THE BODY	Other	No	No	THAT BRAND OF METHYLDOPA WITHDRAW	METHLDOPA	HYPERTENSION	25MG	ORAL	250MG,25MG	TREATMENT OF MALARIA
44	F		PERSISTENT DIZZINESS, HEADACHE,JOINT PAIN	Other	No	No	TAB DIAZEPAM,PARACETAMOL	TDF/3TC/EFV	HIV TREATMENT	300MG,600MG	ORAL	960MG	O.I PROPHYLAXUS
50	F		SEVERE BURNING SENSATION, PAINS THROUGHOUT THE BODY	Recovered fully	No	No	STOPPED THE BRAND OF CALCIUM CHANGED TO A,LODIPINE 5MG AND WAS REPLACED BY ANOTHER BRAND	AMLODIPINE	MANAGEMENT OF HYPERTESION	5MG	ORAL	500MG,5MG,75MG	MANAGEMENT OF DIABETES AND PAIN
45	F	40	EPIGASTRIC PAIN, LOSS OF APPETITE,JOINT PAIN,GENERAL BODY WEAKNESS	Other	Yes	No	IV DETROSE SALINE,NOGENESIUM	TDF/3TC/EFV	HIV/AIDS	300MG,600MG	ORAL	960MG	O.I PROPHYLAXUS
43	F	71	SEVERE DIZZINESS, WEAKNESS ALL OVER THE BODY,LOSS OF APPETITE	Recovered fully	No	No	TAB ACT,TAB DICLOFENAC 50MG,	RIFAMPICIN	TREATMENT OF TB	600MG	ORAL	300MG,100MG,400MG	TREATMENT OF TB
29	F	52	MASCULAR SKIN LESION WITH INTER SKIN NODULES THAT ITCH	Other	No	No	TRUIALENT CREAM TROPICALLY,TABS CHLORPHENIRAMINE	EFAVIRENZ	MANAGEMENT OF HIV	650MG	ORAL	350MG,480MG,100MG	O.I PROPHYLAXUS
60	F		DIZZINESS,GENERAL WEAKNESS OF THE BODY,DROWSINESS,FEVERISH FEELING	Recovered fully	No	No	PARACETAMOL,WITHDRAWL OF SUSPECTED MEDICINE	LISINOPRIL	HIGH BLOOD PRESSURE	10MG	ORAL	10MG,250MG,20MG	HYPERTENSION
40	F	56	SEVERE PAIN INSIDE THE BONE ACCOMPANIED WITH MUSCLE PAIN THAT LASTED FOR MANY YEARS	Other	No	No	TABS NORGESTIC	TENOFOVIR	MANAGEMENT OF HIV	300MG	ORAL	480MG,300MG,650MG	MANAGEMENT OF HIV
39	F	81	SHORTNES OF BREATH,PALPITATION	Recovered fully	No	No	SUSPECTED DRUG(AMLODIPINE) WITHDRAWN	AMLODIPINE	HIGH BLOOD PRESSURE	10MG	ORAL	5MG,500MG	MANAGEMENT OF DIABETES
10	M	21	ABDOMINAL PAIN,DIARRHOEA,JAUNDICE	Recovered fully	No	No	ORS TO BE REPEATED	R-H	PULMONARY TB	120MG	ORAL
6	M	15	PAIN IN THE EYES,VISUAL DISTURBANCES	Recovered fully	No	No	CHANGED DOSE OF DRUG TO 50MG	ETHAMIBUTOL	TB	100MG	ORAL	600MG,300MG,150MG	ABD. TB
13	F	26	SEVERE VOMITING,ABNORMAL SPEECH	Recovered fully	No	No	PYRIDAXINE,ORS	R/H/Z	PULMONARY TB	240MG	ORAL	400MG	MALARIA
35	F	50	VOMITING,DIARRHOEA	Recovered fully	No	No	PROMETHAZINE	RIFAMPICIN	PULMONARY TB	225MG	ORAL
48	M	75	BURNING SENSATION ON THE FEET AND PALMS,PAIN ON THE LEFT MUSCLES	Recovered fully	No	No	PYRIDOX TABS	RIFAMPICIN	PULMONARY TB	100MG	ORAL
38	M		BODY PAIN(MAJORLY ON THE LEGS),INSOMNIA	Recovered fully	No	No	PARACETAMOL TAB,LEXOTAN TAB	ARTHEMETHER-LUMEFRATINE	ANTI MALARIA	400MG	ORAL
40	M	56	GYNAECOMASTIA	Other	No	No	STOP DRUG AND SWITH REGIMEN	EFAVIRENZ	HIV/AIDS	600MG	ORAL	300MG,150MG	HIV
43	F	98	SEVERE BLISTERING PEELING OF THE SKIN OF MOUTH,TONGUE, THROAT,PAINFULL SWOLLEN	Other	No	No	PALLIATIVE,ANALGESICS FOR PAIN,BALM FOR SOOTHING	NEVIRAPINE	HIV	200MG	ORAL	960MG,150MG,600MG	HIV
37	F	63	ANAEMIA	Other	No	No	STOP DRUG AND SWITCH REGIMEN	ZIDOVUDINE	HIV/AIDS	300MG	ORAL
34	F	45	ANAEMIA,WEAKNESS,TIREDNESS	Other	No	No	TRANSFUSE 2-3 PINTS OF BLOOD,HAEMATINICS	ZIDOVUDINE	HIV/AIDS	300MG,600MG	ORAL	400MG,300MG	TREATMENT OF TB,hiv
40	F	53	ABDOMINAL DISCOMFORT AND DISTENTION,FLATULENS,PERSISTENT DIARRHOEA	Other	No	No	SWITCH DRUG TO ATAZANOVIR	LOPINAVIR	HIV/AIDS	400MG	ORAL
34	F	50	PALE AND WEAKNESS,TIREDNESS,IRRATIONAL SPEECH AND BEHAVIOUR,DISORIENTATION,VERY ILL-LOOKING PATIENT	Other	Yes	No	STOP ALL DRUG,TRANSFUSE AND REINTRODUCE NEW REGIMEN AFTER 2 WEEK	EFAVIRENZ	HIV/AIDS	600MG	ORAL	5M,960MG	O.I PROPHYLAXUS,HIV
20	F	54	SKIN REACTIONS					COTRIMOXAZOLE	PREVENTION OF CHEST INFECTION	960MG	ORAL	300MG,100MG	TREATMENT OF HIV
40	F	65	INFLAMATION OF THE HIPS					COTRIMOXAZOLE	PREVENTION OF CHEST INFECTION	960MG	ORAL	300MG,300MG,600MG	HIV/AIDS
59	F	44	LIPO DYSTROPHY, PERIPHERAL NEUROPATHY	Other					ARV THERAPY	300MG	ORAL	300MG	ARV THERAPY
58	F	65	RENAL IMPAIRMENT	Other	No	No	DIALYSIS,DRUG CHANGED TO NEW REGIMEN	TENOFIVIR,LAMIVUDINE	ANTIRETROVIRAL	1 TAB DAILY	ORAL	300MG	ANTI RETROVIRAL
52	F		SKIN REACTIONS	Other	No	No	STOPPAGE OF THE DRUGS					960MG	PREVENTION OF CHEST INFECTION
50	M	76	DIARHOEA,FLATULENCE	Other	No	No		LOPINAVIR,RITONAVIR	ANTIRETROVIRAL	1 BD	ORAL	1 BD	ANTI RETROVIRAL
17	M	44	GENERALIZED BODY RASH	Recovered fully	No	No	HYDROCORTISONE INJ.,TAB PREDNISOLONE,TAB LORATIDINE	ARTHEMETER	ANTI MALARIA	160MG	INTRAMUSCULAR	600MG	ANTIPYRETIC
4	F	23	RASHES,PRURITUS,ITCHING,EXCORIATIONS	Recovered fully	No	No	HYDROCORTISONE INJ.,INJ. PIRITON,SYR PIRITON	SULFADOXINE/PYRIME	ANTI MALARIA	5ML	ORAL	5ML	ANTIPYRETIC
42	M	72	SWELLING OF BOTH FEETS	Other	No	No	WITHDREW AMLODIPINE	AMLODIPINE	HYPERTENSION	10MG	ORAL	1 BD	ANTI RETROVIRAL
38	F	89	NAUSEA,VOMITTING,METALLIC TASTE,DIZZINESS	Other	No	No		TDF/3TC/EFV	HAART	1 BD	ORAL	960MG	O.I PROPHYLAXUS
41	M	69	GENERALIZED BODY WEAKNESS,DIZZINESS,CHESTPAIN	Other	No	No		TDF/3TC/EFV	HAART	1 BD	ORAL	960MG	O.I PROPHYLAXUS
33	M		COLD SORE AROUND THE NOSE	Other	No	No			CATARRH	250MG	ORAL
35	M	72	DIZZINESS,MALAISE	Other	No	No		SULFADOXINE/PYRIME	MALARIA	250MG,500MG	ORAL	500MG	HEADACHE
28	M	63	NAUSEA,VOMITTING,SEVERE DIARRHOEA	Recovered fully	No	No		COTRIMOXAZOLE	COUGH	480MG	ORAL
33	M	65	DRY LIPS, RASHES IN GENITAL AREA	Other	No	No		AMOXILLIN	COUGH	500MG	ORAL	100M	COUGH
35	F	72	INSOMNIA,WEIGHT LOSS	Other	No	No		TDF/3TC/EFV	RVD	1 DAILY	ORAL	960MG	RVD
	M		FREQUENT STOOLING MORE THAN FOUR TIMES DAILY	Other	No	No		EFV/3TC/TDF	HIV/AIDS	600MG	ORAL
9	M	33	NAUSEA,VOMITTING,DIARRHOEA, RESTLESSNESS		No	No		AZT/3TC/NVP	HIV/AIDS	300MG,600MG	ORAL
26	M	64	ABDOMINAL PAIN, SKIN RASHES,COLORED URINE	Other	No	No		RIFAMPICIN,ISONAMIDE	TUBERCULOSIS	150MG,400MG	ORAL
40	F	53	HEADACHE,NAUSEA AND INSOMNIA	Other	No	No		AZT/3TC/NVP	HIV/AIDS	200MG,400MG	ORAL	460MG	O.I PROPHYLAXUS
40	F	54	RASHES	Recovered fully	No	No		COTRIMOXAZOLE	PROPLAXUS O.I	960MG	ORAL	460MG	ART REGIMEN
55	F	65	NAUSEA, DIZZINESS	Other	No	No		LOPINAVIR,RITONAVIR	HIV/AIDS			300MG	HIV/AIDS
35	F	48	PERSISITENT HEADACHE		No	No		AZT/3TC/NVP	HIV/AIDS		ORAL	300MG,960MG	HIV/AIDS
30	F	70	MALAISE,WEAKNESS,DIZINESS		No	No		AZT/3TC/NVP	HIV/AIDS	150MG,300MG	ORAL
33	M	106	TREMOR,SWEATNESS,INSOMNIA,TARCHYCARDIA		No	No			COUGH	10ML DAILY	ORAL
36	F		FACIAL PIMPLES , JOINT PAIN	Recovered fully	No	No		TDF/3TC/EFV	ARV THERAPY	1 NOCTE	ORAL	DAILY	PROPHYLAXUS
31	F	68	HEADACHE,DIZZY,FAINTNESS, RESTLESSNESS	Recovered fully	No	No		TDF/3TC/EFV	ARV THERAPY	I NOCTE	ORAL	960MG	O.I PROPHYLAXUS
30	F	55	FEELING SAD,TIRED WITH LOW ENERGY	Recovered fully	No	No		TDF/3TC/EFV	ARV THERAPY	1 NOCTE	ORAL	960MG	O.I PROPHYLAXUS,IMMUNE BOOSTER
35	M	44	PRURITIC ERUPTION ON THE FACE,NAUSEA, VOMITING	Recovered fully	No	No		TDF/3TC/EFV	ARV THERAPY	1 NOCTE	ORAL	960MG	O.I PROPHYLAXUS
40	F	56	TINGLING SENSATION IN HANDS, FEET,NO APPETITE,FEELING WEAK	Recovered fully	No	No		TDF/3TC/EFV	ARV THERAPY	1 NOCTE	ORAL	960MG,200MG	O.I PROPHYLAXUS,ORAL CANDIDIASIS
52	M	79	PRURITIS,SLEEPLESSNESS,COLOURED URINE, DRY MOUTH	Recovered fully	No	No		TDF/3TC/EFV	ARV THERAPY	1 NOCTE	ORAL	960MG	O.I PROPHYLAXUS
1	M		RASHES ALL OVER THE BODY	Other	No	No	UIV HYDROCORTISONE,INJ PROMADIAZINE,FUNBACT A CREAM	ARTEMETER/LUMEFRADINE	ANTIMALARIA	120MG	ORAL
50	F		DIZZINESS,HEADACHE,INSONMIA	Recovered fully	No	No			ANTIRETROVIRAL	1 NOCTE	ORAL	960MG	O.I PROPHYLAXUS
30	F	55	HALLUCINATION,INSONMIA,DEPRESSION,PARANOID DELUSION,AGGRESIVENESS	Other	No	No	REFERRED TO PSYCHIATRIC CLINIC,REGIMEN CHANGED TO TDF/3TC/NVP		ANTIRETROVIRAL	1 NOCTE	ORAL	960MG	O.I PROPHYLAXUS
36	M		GYNAECOMASTIA,SWOLLEN NECK,SORE THROAT	Other	No	No			ANTIRETROVIRAL	400MG	ORAL	10MG,50MG	ANTI HYPERTENSIVE
17	F		PRURITIS,RASHES ALL OVER THE BODY	Other	No	No		ARTEMETER/LUMEFRADINE	ANTI MALARIA	1 NOCTE	ORAL	400MG,I BD	ANTIMALARIA,ANALGESTIC
28	M	48	DIARRHOEA,DIZZINESS	Other	No	No		EFAVIRENZ	HIV	600MG	ORAL
30	F	46	SEVERE BODY WEAKNESS	Other	No	No	SHE WAS ENCOURAGED TO REST AND EAT WELL	LAMIVUDINE/NEVIRAPIN	HIV	DAILY	ORAL	960MG
24	M		LOSS OF APPETITE,GENERAL BODY WEAKNESS	Other	No	No	SHE WAS ENCOURAGE TO EAT NUTRIOUS FOOD WITH FRUITS	ZIDOVUDINE,LAMIVUDINE	HIV	DAILY	ORAL	DAILY	O.I PROPHYLAXUS
87	M	65	SLURRED SPEACH,SWELLING OF THE LIP AND FACES,TONGUE	Recovered fully	No	No	IV HYDROCORTISONE 200MG,PREDISOLONE	HERBAL CONCORTION	FEVER,MALARIA	DAILY	ORAL	10MY,200MG	HYPERTENSION
30	F	89	FAINTING ATTACK,DIZZINESS,DROWSINESS	Recovered fully	No	No	ARTHEMETER INJECTION WAS STOPPED AND CHANGED TO TAB CORTEM	ARTEMETER/LUMEFRADINE	MALARIA	160MG	IV	100MG	ANALGESIC
36	M		PAPULAR RASHES,PRURITIS, INSOMIA	Recovered fully	No	No	TAB PREDISOLONE,IM CHLOROQUINE WAS STOPPED	CHLOROQUINE	MALARIA	5ML	INTRAMUSCULAR	1G,4MG	ANALGESTIC
42	F	69	ABDOMINAL PAIN,NAUSEA,VOMITTING	Recovered fully	No	No	TAB HYDROCORTISONE 10MG	TDF/3TC/EFV	HIV/AIDS	DAILY	ORAL	DAILY	O.I PROPHYLAXUS
46	F		HEADACHE,INSONMIA	Recovered fully	No	No	PIRITON 4MG NOCTE	AZT/3TC/NVP	HIV	DAILY	ORAL	DAILY	PROPHYLAXUS
64	M		SEVERE PRURITIS,PAPULAR RASH	Other	No	No	PIRITON 4MG NOCTE,PREDISOLONE 4MG NOCTE	AZT/3TC/NVP	HIV/AIDS	DAILY	ORAL	DAILY	PROPHYLAXUS
36	M	60	NIGHTMARES,DIZZINESS, RESTLESSNESS	Recovered fully	No	No	DRUGS WERE CHANGED TO NEVIRAPINE	EFAVIRENZ	MANAGEMENT OF HIV	600MG	ORAL	960MG,300MG,300MG	O.I PROPHYLAXUS AND HIV
21	F	54	LOSS OF APPETITE,INSOMNIA,NAUSEA,TIREDNESS	Recovered fully	No	No	AMODIQUINE WAS STOPPED AND CHANGED TO COARTEM	AMODIQUINE	MALARIA	2 TABLETS DAILY	ORAL
54	F	57	PAPULAR RASH,SKIN PIGMENTATION	Other	No	No	COTRIMOXAZOLE 960MG,PREDISOLONE 6MG	TDF/3TC/EFV	HIV/AIDS	300MG,600MG	ORAL
4	M	14	HAEMATOSIS	Recovered fully	No	Yes	ARTESUNATE WAS REPLACED WITH I.M ARTHEMETER	ARTESUNATE	MALARIA		ORAL
43	M	70	INSONMIA,GENERAL BODY WEAKNESS AFFECTION ACTIVITIES OF DAILY LIVING	Other	No	No	COTRIMAZOLE 960MG AND PREDISOLONE	TENOFIVIR,LAMIVUDINE	HIV/AIDS	300MG	ORAL	960MG,600MG	O.I PROPHYLAXUS,HIV
32	F	54	SEVERE VOMITING FOR ABOUT 5-7 TIMES IN A DAY,RESTLESSNESS, IRRATIONAL SPEECH	Recovered fully	Yes	No	PROMETHAZINE INJ,IV FLUID,ANTIBIOTICS	ZIDOVUDINE	HIV/AIDS	300MG	ORAL		WEAKNESS AND BODY PAIN
26	F	45	GIT DISTURBANCES	Other	No	No	PSYCHOLOGY SUPPORTED	TDF/3TC/EFV	HIV/AIDS	DAILY	ORAL
	F	60	OTITIS MEDIA	Recovered fully	No	No	TAB CEFRIME 500MG	ZIDOVUDINE,NEVIRAPINE	HIV/AIDS	DAILY	ORAL	DAILY	PROPHYLAXUS,OTITIS MEDIA
24	F	62	INSONMIA,TIREDNESS	Other	No	No	PSYCHOLOGICALLY SUPPORTED	AZT/3TC/NVP	HIV/AIDS	DAILY	ORAL
1	M	40	LOSS OF WEIGHT,MALNOURISHED, WEAK	Other	No	No	COUNSELLED ON FOOD NUTRITION AND ADEQUATE FEEDING	NEVIRAPINE	HIV/AIDS	T.B.D	ORAL
48	M		DIZZINESS,GIT INTOLERANCE	Recovered fully	No	No	ENCOURAGE TO EAT WELL	AZT/3TC/NVP	HIV/AIDS	DAILY	ORAL	DAILY	PROPHYLAXUS
23	F	50	SKIN RASHES,HEADACHE	Other	No	No	ENCOURAGE TO USE DRUG DAILY,TAB PIRITON	AZT/3TC/NVP	HIV		ORAL	960MG,4M	PROPHYLAXUS
30	F	84	PRURITIS	Recovered fully	No	No	PIRITON 4MG NOCTE	AZT/3TC/NVP	HIV	DAILY	ORAL	DAILY	PROPHYLAXUS
30	F	59	SEVERE DIZZINESS	Recovered fully	No	No	DRUG REGIMEN CHANGED TO AZT/3TC/NVP	TDF/3TC/EFV	HIV/AIDS	DAILY	ORAL	960MG	PROPHYLAXUS
65	M	61	SEVERE HEADACHE	Other	No	No	ANTI HYPERTENSIVE DRUG WAS GIVEN	TDF/3TC/EFV	HIV	DAILY	ORAL	DAILY	HYPERTENSION
55	F	69	INSOMNIA,GENERAL BODY WEAKNESS AFFECTING ACTIVITIES OF DAILY LIVING	Recovered fully	No	No	TREATED FOR MALARIA WITH TAB ALAXIN	AZT/3TC/NVP	HIV		ORAL	DAILY	PROPHYLAXUS,MALARIA
40	F	60	FEELING NAUSEA, DIZZINESS, ABDOMINAL PAIN	Other	No	No	COUNSELLED	TDF/3TC/EFV	HIV	DAILY	ORAL	DAILY	PROPHYLAXUS
36	F	57	BODY WEAKNESS,FEVER,SNEEZZING, CATTARCH, COUGH	Recovered fully	No	No	TREATED FOR UPPER RESPIRATORY TRAIT INFECTION	AZT/3TC/NVP	HIV	1 BD	ORAL	DAILY	PROPHYLAXUS,UTI
22	M	72	PRURITIS,GENERAL BODY WEAKNESS	Recovered fully	No	No	STOPPED ARTESUNATE AND REPLACED WITH I.M ARTEMETHER	ARTESUNATE INJECTION	MALARIA	DAILY	IM	DAILY	ANALGESTIC
28	F	52	RESTLESSLESS, GENERAL BODY WEAKNESS,LOSS OF APPETITE	Recovered fully	No	No	COUNSELLED ON ADEQUATE REST AND NUTRITION	AMODIQUINE	MALARIA	BD	ORAL	DAILY	ANALGESTIC
31	F	42	WEIGHT LOSS,GENERAL BODY WEAKNESS,INSONMIA		No	No	ADEQUATE REST AND EAT WELL BALANCED DIET	TDF/3TC/EFV	HIV	DAILY	ORAL	DAILY	PROPHYLAXUS
30	F	51	RAHES,PRURITIS, BLACK SPOTS	Recovered fully	No	No	CHANGED THE REGIMEN	TDF/3TC/EFV	ANTIRETROVIRAL	DAILY	ORAL	DAILY	PROPHYLAXUS
29	M	45	HEADACHE FOR OVER A MONTH	Other	No	No		AZT/3TC/NVP	ANTIRETROVIRAL	DAILY	ORAL	DAILY	SUPPLEMENT
46	F	29	LEG PAIN FOR 2WEEKS	Other	No	No		TDF,3TC,EFV	ANTI PETROVIBAL	DAILY	ORAL	DAILY,DAILY	SUPPLEMENTS,SUPPLEMENTS
41	F	33	SEVERE ANAEMIA	Recovered fully	Yes	No	WHOLE BLOOD TRANSFUSION,IV PROMETHAZINE,IV LAXIS,MEDICATION SWITCHED TO TDF/3TC/EFV	3TC/NVP/ZDV	HIV/AIDS	300MG.150MG	ORAL	960MG	PCP PROPHYLAXIS,BLOOD BUILDER
16	M	35	SEVERE ANAEMIA	Recovered fully	No	No	DISCONTINUED ZDV/3TC/NVP,TRANSFUSION WITH WHOLE BLOOD	3TC/NVP/ZDV	HIV/AIDS	300MG	ORAL	480MG,400MG	PCP PROPHYLAXIS,ANTI HEAMATICS
51	F	7208	GENERALISED EDEMA(BILATERAL PEDAL)	Recovered fully	No	No	DISCONTINUED TDF/3TC/EFV START ZDV/3TC/NVP	TDF/3TC/EFV	HIV/AIDS	300MG,600MG	ORAL	480MG	PCP PROPHYLAXIS
49	M	79	SEVERE ANAEMIA	Recovered fully	No	No	DISCONTINUED ZIDOVUDINE,SUBTITUTE WITH TDF,TRANSFUSION	AZT/3TC/NVP	HIV/AIDS	300MG,600MG	ORAL	960MG	PCP PROPHYLAXIS
45	F	46	MACULO PAPULAR RASH ON THE FACE,ORAL MUCOSA ULCER,ITCHING	Recovered fully	No	No	DISCONTINUED COTRIMOXAZOLE,LORATIDINE 10MG	COTRIMOXAZOLE	PCP PROPHYLAXIS	960MG	ORAL	T.B.D	BILATERAL SOL
45	M	103	HEADACHE,INSONMIA	Other	No	No	AVOID FATTY MEALS	TDF/3TC/EFV	HIV/AIDS	600MG	ORAL	960MG	PCP PROPHYLAXIS
75	F	54	PRURITIS, RASHES	Recovered fully	No	No	DISCONTINUED COTRIMOXAZOLE,LORATIDINE	COTRIMOXAZOLE	PCP PROPHYLAXIS	960MG	ORAL	DAILY	HIV/AIDS
50	F		IRRIRABILITY, GENERALISED MALAISE	Recovered fully	No	No	DISCONTINUATION OF ISONIAZIA	ISONIAZIDE	PULMONARY TB	300MG	ORAL	960MG	PCP PROPHYLAXIS
48	F	60	PRURITIS	Recovered fully	No	No	DISCONTINUATION OF COTRIMOXAZOLE,TAB LORATIDINE	COTRIMOXAZOLE	PCP PROPHYLAXIS	960MG	ORAL	DAILY	HIV/AIDS
32	F	70	DIZZINESS,VIVID DREAMS	Recovered fully	No	No		TDF/3TC/EFV	HIV/AIDS	600MG	ORAL	960MG	PCP PROPHYLAXIS
42	M	62.5	ANGIONEUROTIC EDEMA(SWOLLEN LIPS AND DIFFICULTY IN SWALLOWING	Recovered fully	No	No	DISCONTINUATION OF LISINOPRIL,IV HYDROCORTISONE	LISINOPRIL	HYPERTENSION	500MG	ORAL	DAILY	HYPERTENSION
36	F	48.5	VOMITTING,ABDOMINAL PAIN	Other	No	No	SUSP. EMTRISIL 10ML,PARACETAMOL	TDF/3TC/EFV	HIV INFECTION	300MG,600MG	ORAL
44	M	74	DIZZINESS	Recovered fully	No	No	AVOID FATTY MEAL AROUNDTHE TIME OF TAKING ARV	TDF/3TC/EFV	HIV/AIDS	600MG	ORAL	960MG	PCP PROPHYLAXIS
53	F		INSOMNIA,HEADACHE	Recovered fully	No	No	REDUCE FATTY MEAL BEFORE OR AFTER MEDICATION	TDF/3TC/EFV	HIV/AIDS	600MG	ORAL	960MG	PCP PROPHYLAXIS
53	F	41	PEDAL EDEMA	Other	No	No	POSITIONING OF LEG DURING SLEEPING,LAB INVESTIGATION	TDF/3TC/EFV	HIV/AIDS	300MG,600MG	ORAL
30	F	51	RASH, PRURITIS	Recovered fully	No	No	DISCONTINUED COTRIMOXAZOLE,TAB LORATIDINE	COTRIMOXAZOLE	PCP PROPHYLAXIS	960MG	ORAL	300MG,300MG,600MG	HIV/AIDS
34	F	51	COUGH, SORE THROAT	Recovered fully	No	No		ISONIAZIDE	PCP PROPHYLAXIS	300MG,600MG	ORAL	300MG,300MG,600MG	HIV/AIDS
16	F		VOMITTING,PRURITIS	Recovered fully	No	No	DC-CODISSN PLUS		MALARIA	T.B.D	ORAL	2 TDS	FEVER
47	F	60	HOT FLUSHES	Recovered fully	No	No	DISCONTINUE TDF/3TC/EFV	TDF/3TC/EFV	HIV/AIDS	600MG	ORAL	960MG	PCP PROPHYLAXIS
60	M	93	DIZZINESS,WEAKNESS	Recovered fully	No	No	CAP ASTYMIN,FERROOS TONIS,TAB NEUROVITE	TDF/3TC/EFV					O.I PROPHYLAXUS
30	F		EXFOLIATION DEMATITIS,PRURITIS, RASHES	Recovered fully	No	No	TAB PREDISOLONE,TAB PIRITON,DISCONTINUE COTRIMOXAZOLE	TAB COTRIMOXAZOLE	PROPLAXUS O.I	960MG	ORAL	1 NOCTE	ART
41	F	60	RASHES,PRURITIS	Recovered fully	No	No	TAB CIPROFLOXACIN,TAB LORATIDINE,CLOTRIMAZOLE CREAM,TAB PIRITON 4MG	TDF/3TC/EFV	ART	1 NOCTE	ORAL	1 TAB DAILY	PROPHYLAXUS
39	F	75	RASHES, PRURITIS	Recovered fully	No	No	TAB CIPROFLOXACIN,TAB LORATIDINE,TAB PIRITON	TDF/3TC/EFV	ART	1 TAB NOCTE	ORAL	1 TAB	O.I PROPHYLAXUS
40	F	60	RASHES,PRURITIS	Recovered fully	No	No	TAB CIPROFLOXACIN,TAB LORATIDINE,TAB PIRITON,EXFIX CREAM	TDF/3TC/EFV	ART	1 NOCTE	ORAL	960MG,1G	O.I PROPHYLAXUS
43	M	75	RASHES,PRURITIS	Recovered fully	No	No	TAB CHLOPHENIRAMINE,CLOTRIMAZOLE	AZT/3TC/NVP	ART	1 NOCTE	ORAL	960MG	O.I PROPHYLAXUS
48	F	73	RASHES,PRURITIS	Recovered fully	No	No	TAB CIPROFLOXACIN,TAB PIRITON 4MG NOCTE,CLOTRMAZOLE	TDF/3TC/EFV	ART	1 NOCTE	ORAL	960MG	O.I PROPHYLAXUS
49	F	75	NUMBNESS AT EXTREMITIES	Recovered fully	No	No	TAB NEUROVITE,VITAMIN B COMPLEX,ASTYMIN	ISONIAZIDE	IPT	300MG,600MG	ORAL	10MG,1 NOCTE	O.I PROPHYLAXUS
41	F	41	RASHES,PRURITIS	Recovered fully	No	No	CHLORPHENIRAMINE TABLET,LORATIDINE	TDF/3TC/EFV	ART	1 NOCTE	ORAL	960MG	O.I PROPHYLAXUS
42	M	60	RASHES, PRURITIS	Recovered fully	No	No	TAB CIPROFLOXACIN,TAB PREDISOLONE	TDF/3TC/EFV	ART	1 NOCTE	ORAL	960MG	O.I PROPHYLAXUS
50	F	55	RASHES,PRURITIS	Recovered fully	No	No	CHLORPHENIRAMINE TABLET,LORATIDINE	COTRIMOXAZOLE	PCP PROPHYLAXIS	960MG	ORAL
39	F	50	PRURITIS	Recovered fully	No	No	TAB LORATIDINE 10MG	TDF/3TC/EFV	ART	1 NOCTE	ORAL	960MG,1G	O.I PROPHYLAXUS
	F	80	RASHES,PRURITIS	Recovered fully	No	No	CIPROFLOXACIN TAB,LORATIDINE TAB,PIRITON	TDF/3TC/EFV	ART	1 NOCTE	ORAL	960MG	O.I PROPHYLAXUS
63	F	50	DIZZINESS,INSOMNIA,TINGLING AT THE EXTREMITIES,PRUIRITIS	Recovered fully	No	No	TAB AMITHYDINE,PIRITON,HEAMATONIC	TDF/3TC/EFV	ART	1 NOCTE	ORAL	960MG,1G	O.I PROPHYLAXUS
35	F	47	PRURITIS,RASHES WITH PUS	Recovered fully	No	No	TAB CIPROFLOXACIN,TAB PREDISOLONE,PIRITON,CLOTRIMAZOLE	TDF/3TC/EFV	ART	1 NOCTE	ORAL	960MG	O.I PROPHYLAXUS
44	F	53	RASHES,PRURITIS	Recovered fully	No	No	TAB CIPROFLOXACIN,TAB LORATIDINE,TAB PIRITON 4MG,CLOTRIMAZOLE	TDF/3TC/EFV	ART	1 NOCTE	ORAL	960MG	O.I PROPHYLAXUS
23	F	43	RASHES,PRURITIS	Recovered fully	No	No	TAB PREDISOLONE,TAB PIRITON,CLOTRIMAZOLE CREAM	COTRIMOXAZOLE	PROPLAXUS O.I	1 TAB DAILY	ORAL	960MG	O.I PROPHYLAXUS
40	F	105	RASHES,SKIN PRURITIS	Recovered fully	No	No	TAB CIPROFLOXACIN,TAB PREDISOLONE,PIRITON,CHLOPHENIRAMIN	TDF/3TC/EFV	ART	1 NOCTE	ORAL	960MG,1G	O.I PROPHYLAXUS
65	M	67	PRURITIS	Recovered fully	No	No	TAB PREDISOLONE,TAB CHLOREPHENIRAMINE,CLOTRIMAZOLE CREAM	TDF/3TC/EFV	ART	1 NOCTE	ORAL	300MG	O.I PROPHYLAXUS
59	M	65	RASHES,PRURITIS	Recovered fully	No	No	TAB LORATIDNE,TAB PIRITON,CLOTRIMAZOLE CREAM	COTRIMOXAZOLE	PROPLAXUS O.I	960MG	ORAL
42	M	54	STOOLING	Recovered fully	No	No	CAP LOPERAMIDE,TAB CIPROFLOXACIN,ORS	TDF/3TC/EFV	ART	1 NOCTE	ORAL	960MG	O.I PROPHYLAXUS
42	F	74	NAUSEA,VOMITING,RASHES	Recovered fully	No	No	TAB METOCLOPRAMIDE,ORS	COTRIMOXAZOLE	PROPLAXUS O.I	1 NOCTE	ORAL
59	M	65	RASHES,PRURITIS	Recovered fully	No	No	TAB LORATIDINE,TAB PIRITON,CLOTRIMAZOLE CREAM	COTRIMOXAZOLE	PROPLAXUS O.I	1 NOCTE	ORAL
45	F	76	RASHES,PRURITIS	Recovered fully	No	No	TAB PREDISOLONE,TAB PIRITON,CLOTRIMOZOLE	COTRIMOXAZOLE	PROPLAXUS O.I	1 NOCTE	ORAL
32	F	60	AMENORRHOEA	Other	No	No	REFERRED TO GYNAECOLIST	EFAVIRENZ,LAMIVUDINE,TENOFOVIR	ARV	1 NOCTE	ORAL	960MG	O.I PROPHYLAXUS
48	F	81	LEG NUMBNESS,CRAMPS ON THE HANDS	Other	No	No	TAB VITAMIN C	LAM/NEV/ZID	ART	1 NOCTE	ORAL	960MG	O.I PROPHYLAXUS
51	M	64	STOOLING	Other	No	No	FLAGYL,TAB CIPROFLOXACINR	TDF/3TC/EFV	ARV	1 NOCTE	ORAL	960MG	O.I PROPHYLAXUS
54	F	69	LOSS OF WEIGHT	Other	No	No	REFERRED TO NUTRITIONIST	TDF/3TC/EFV	ART	1 NOCTE	ORAL	960MG	O.I PROPHYLAXUS
60	F	57	SEVERE SKIN RASH	Other	No	No	TAB PIRITON,PREDISOLONE	EFV/3TC/TDF	ART	1 NOCTE	ORAL	960MG	O.I PROPHYLAXUS
30	F	49	VOMITING,STOOLING	Other	No	No	TAB METROPRIMIDE,FLAGYL	EFV/LAM/TDF	ART	1 NOCTE	ORAL
29	F	56	SKIN RASHES	Recovered fully	No	No	TAB PIRITON,PREDISOLONE	LAM/NEV/ZID	ARV	1 NOCTE	ORAL	960MG	O.I PROPHYLAXUS
20	M	48	HEADACHE,SEVERE LOSS OF APPETITE, GENERAL MALAISE	Other	No	No	ARTHEMETER,FLAGLY	EFV/LAM/TEN	ART	1 NOCTE	ORAL	960MG	O.I PROPHYLAXUS
38	F	60	LOSS OF WEIGHT,MUSCULAR PAIN ON THE FEET,BONE,PAIN ON THE LEG	Other	No	No	REFERRED TO THE DOCTOR	LAM/NEV/ZID	ARV	1 NOCTE	ORAL
30	M	65	SKIN RASHES	Recovered fully	No	No	TAB PIRITON,TAB PREDISOLONE	SEPTRIN	PROPLAXUS O.I	960MG	ORAL
25	F	38	IRREGULAR MENSES,DIZZINESS,WEAKNESS	Other	No	No	REFERRED TO THE GYNECOLOGIST	COTRIMOXAZOLE	PROPLAXUS O.I	960MG	ORAL
43	M	48	LOSS OF APPETITE	Recovered fully	No	No		RIFAMCIN	PULMONARY TB	450MG	ORAL	225MG,120MG,725MG	TB
33	M	53	GENERAL BODY WEAKNESS	Recovered fully	No	No		RIFAMPICIN	TUBERCULOSIS	450MG	ORAL	225MG,120MG,722MG	TB
25	F	61	GENERAL BODY PRURITIS	Recovered fully	No	No	TAB PYRIDAXINE	ISONIAZIDE	TB	300MG	ORAL	600MG,A800MG,1100MG	TB
36	M	65	PRURITIS	Other	No	No	TAB PYRIDAXINE	ISONIAZIDE	TB	300MG,600MG	ORAL	600MG,1600MG,110MG	TB
7	F		VOMITTING	Recovered fully	No	No		CEFTRAOXONE	PROPLAXUS O.I	1 DAILY	INTRAVENOUS	200MG	PROPHYLAXUS
40	F		RIGOR	Recovered fully	No	No		METRONIDAZOLE	ANTI BIOTICS	500MG	INTRAVENOUS
40	M		EXTREME RASH, PRURITIS	Other	No	No		EFV/3TC/TDF	ARV	1 NOCTE	ORAL	960MG	O.I PROPHYLAXUS
61	M		GYNEACOMASTIA AT THE LEFT BREAST	Other	No	No		SPIRONOLACTONE	HYPERTENSION	1 TAB DAILY	ORAL	DAILY	HYPERTENSION
28	F		SEVERE RIGOR	Recovered fully	No	No		METRONIDAZOLE		500MG	INTRAVENOUS	5MG
43	M		DYPSNEA	Recovered fully	No	No	WITHDRAWAL OF OFFENSIVE MEDICATION	RAMIPRIL 5MG	DIABETES	25MG	ORAL	DAILY	DIABETES
43	M		RIGOR	Recovered fully	No	No		METRONIDAZOLE	ANTI BIOTICS	500MG	INTRAVENOUS	2G
40	M	63	PEELING OF THE SKIN ALL OVER THE BODY,REDNESS OF THE EYES	Other	No	No			MALARIA	480MG	ORAL	80MG
75	F		VOMITTING	Other	No	No			ANTI DIABETIC	500MG	ORAL	10MG	HYPERTENSION
42	F	60	WEAKENING,RESTLESSNESS,TACHYCARDIA,DIZZINESS	Recovered fully	No	No		SPIRINDLACTONE	OEDEMA	DAILY	ORAL	40MG,200MG
30	F	49	EXCESSIVE RASHES ALL OVER THE BODY,DIARRHOEA,LOSS OF SIGHT(LEFT EYE)	Other	No	No		TDF/3TC/EFV	ART	DAILY	ORAL	960MG	O.I PROPHYLAXUS
39	M	50	BLISTERING, PEELING OF THE SKIN,PRURITIS		No	No		COTRIMOXAZOLE	PROPLAXUS O.I	960MG	ORAL	300MG
60	F	62	PSYCHOSIS	Recovered fully	No	No		TAB CYCLOSERINE	MDR TB	250MG	ORAL	1G,250MG,500MG	MDR TB
60	F	62	DEPRESSION	Recovered fully	No	No	TAB AMITRYPTILLINE	TAB CYCLOSERINE	MDR TB	250MG	ORAL	1G,250MG,500MG	MDR TB
25	F	53	NAUSEA,VOMITTING	Other	No	No	TAB METOCLOPRAMIDE,10MG	PROTHIONAMIDE TAB	MDR TB	250MG	ORAL	1G,250MG,500MG	MDR TB
60	F	62	PERIPHERAL NEUROPATHY	Recovered fully	No	No	TAB NEUROVITE FORTE	TAB CYCLOSERINE	MDR TB	250MG	ORAL	1G,250MG,	MDR TB
25	M	59	PSYCHOSIS	Recovered fully	No	No	TAB HALOPERIDOL,BENZHEXOL	TAB CYCLOSERINE	MDR TB	250MG	ORAL	1G,250MG	MDR TB
33	M	65	ARTHRALGIA	Recovered fully	No	No	TAB TRAMADOL	PYRAZINAMIDE	MDR TB	500MG	ORAL	1G,250MG,	MDR TB
28	M	52	ARTHRALGIA	Recovered fully	No	No	TAB IBRUPROFEN	PYRAZINAMIDE	MDR TB	500MG	ORAL	1G,250MG,	MDR TB
28	M	52	PERIPHERAL NEUROPATHY	Recovered fully	No	No	TAB NEUROVITE FORTE	TAB CYCLOSERINE	MDR TB	250MG	ORAL	1G,250MG,	MDR TB
28	M	52	DEPRESSION	Recovered fully	No	No	TAB TRYPTIZOL	TAB CYCLOSERINE	MDR TB	250MG	ORAL	1G,250MG,	MDR TB
50	M	59	DEPRESSION,INSOMNIA	Recovered fully	No	No	TAB TRYPTIZOL	TAB CYCLOSERINE	MDR TB	250MG	ORAL	1G,250MG,	MDR TB
50	M	59	ARTHRALGIA	Other	No	No	TAB IBRUPROFEN	PYRAZINAMIDE	MDR TB	500MG	ORAL	1G,250MG,	MDR TB
47	M	43	ELECTROLYTE IMBALANCE(HYPOKALEOMIA AND HYPONATREMIA)	Other	No	No	IV FLUID	CAPREOMYCIN	MDR TB	750MG	IM	1200MG,750MG,500MG	MDR TB
34	M	59	PEDAL EDEMA	Other	No	No		CAPREOMYCIN	MDR TB	750MG	IM	1600MG,750MG	MDR TB
34	M	59	RHYTHMIC ABDOMINAL PAIN,GASTROINTERITIS	Other	No	No	PCM,FLAGLY,AMOXILLIN	PYRAZINAMIDE	MDR TB	1600MG	ORAL	750MG	MDR TB
61	M	59	HIGH FEVER	Recovered fully	No	No	PARACETAMOL	TAB CYCLOSERINE	MDR TB	750MG	ORAL	750MG	MDR TB
35	F	58	ELECTROLYTE IMBALANCE(HYPONATREMIA)	Other	No	No	IV FLUID	CAPREOMYCIN	MDR TB	750MG	ORAL	1600MG,750MG	MDR TB
35	F	58	EPIGASTIC PAINS	Other	No	No	PCM,FLAGLY,AMOXILLIN	TAB CYCLOSERINE	MDR TB	750MG	ORAL	750MG	MDR TB
35	M	44	ELECTROLYTE IMBALANCE( HYPONATREMIA)	Other	No	No		CAPREOMYCIN	MDR TB	750MG	IM	750MG	MDR TB
28	F	43	MUSCLE STIFFNES	Other	No	No	CALCIUM SUPPLEMENT	LEVOFLOXACIN	MDR TB	750MG	ORAL	500MG	MDR TB/HIV
28	F	43	LOSS OF APPETITE,DEHYDRATION	Other	No	No	IV FLUID,COUNSELLING	PROTHRORAMIDE	MDR TB	500MG	ORAL	500MG	MDR TB
28	F	43	DIARRHOEA,FATIGUE	Other	No	No	IVF	LAMIVUDINE	HIV/AIDS	300MG	ORAL	1200MG,500MG	MDR TB
28	F	48	HYPOKALAEMIA	Other	No	No	IVF,SUPPLEMENT	CAPREOMYCIN	MDR TB	500MG	IM	1200MG,500MG	MDR TB
28	F	43	ANAEMIA	Other	No	No	DOUBLE DOSE OF HEAMATINICS	TAB CYCLOSERINE	MDR TB	500MG	ORAL	500MG,1200MG	MDR TB
60	M	60	BODY PAIN	Recovered fully	No	No	PARACETAMOL	PYRAZINAMIDE	MDR TB	1200MG	ORAL	225MG,450MG,825MG	DS-TB
29	M	48	PRURITIS,RASHES	Recovered fully	No	No	PIRITON	RIFAMPICIN	DS-TB	450MG	ORAL	225MG	DS-TB
23	F	40	PERSISTANT PRURITIS	Recovered fully	No	No	ANTACID,PARACETAMOL	ETHAMIBUTOL	DS-TB	825MG	ORAL	450MG,225MG,1200MG	DS-TB
48	M	40	PAIN, TENDERNESS OF UPPER LIMBS	Other	No	No	PARACETAMOL,ASTYMIN	ISONIAZIDE	DS-TB	225MG	ORAL	450MG	DS-TB
45	F	50	PRURITIS	Recovered fully	No	No	PIRITON TAB	RIFAMPICIN	DS-TB	450MG	ORAL	225MG,825MG,1220MG	DS-TB
23	F	40	BODY PAIN	Other	No	No	PARACETAMOL TAB	PYRAZINAMIDE	DS-TB	1200MG	ORAL	225MG,825MG,450MG	DS-TB
34	M	54	JOINT PAIN,PAIN IN THE UPPER LIMBS	Other	No	No	DICLOFENAC TAB	LEVOFLOXACIN	MDR TB	750MG	ORAL	1200MG,750MG	MDR TB
32	M	52	PAINS IN THE SHOULDER AND FEET	Recovered fully	No	No	PARACETAMOL,DICLOFENAC TAB	PYRAZINAMIDE	MDR TB	1600MG	ORAL	750MG	MDR TB
32	F	46	BLEEDING THROUGH THE VAGINAL, SPONTANEOUS ABORTION	Other	Yes	Yes	BLOOD TRANSFUSION	RIFAMPICIN	DS-TB	450MG	ORAL	225MG	DS-TB
36	M	55	PAINS IN THE LOWER EXTREMETIES	Other	No	No	PARACETAMOL TAB	PYRAZINAMIDE	MDR TB	160MG	ORAL	250MG,750MG	MDR TB
36	M	50	INSOMNIA	Recovered fully	No	No	DIAZEPAM TAB	TAB CYCLOSERINE	MDR TB	750MG	ORAL	750MG	MDR TB
38	M	51	EPIGASTRIC PAIN,CHEST PAIN	Other	No	No	OMEPRAZOLE,ANTACID,AMOXICILLIN	CYCLOSERINE	MDR TB	750MG	ORAL	1600MG,750MG	MDR TB
28	F	43	NAUSEA,VOMITTING	Recovered fully	No	No	REPEAT AND STOPPING OF DOSE	PROTHRORAMIDE	MDR TB	750MG	ORAL	750MG	MDR TB/HIV
27	M	40	ELECTROLYTE IMBALANCE( HYPONATREMIA)	Other	No	No	IV FLUID	CAPREOMYCIN	MDR TB	500MG	IM	1200MG,500MG	MDR TB
61	M	59	POLYUREA	Other	No	No	PSYCHOLOGIST COUNSELLING	CAPREOMYCIN	MDR TB	750MG	INTRAMUSCULAR	750MG	MDR TB/HIV
61	M	59	EPIGASTRIC PAIN,GIT DISTURBANCE	Recovered fully	No	No	RELCOR GAL	LEVOFLOXACIN	MDR TB	750MG	ORAL	1600MG,750MG	MDR TB/HIV
30	M	51	BODY PAIN,BACK PAIN	Recovered fully	No	No	PARACETAMOL TAB	PYRAZINAMIDE	MDR TB	1600MG	ORAL	750MG	MDR TB
28	F	43	SUiCIDAL ATTEMPT	Other	No	No	ESCITALUPRAM,VALIUM TAB	TAB CYCLOSERINE	MDR TB	750MG	ORAL	1200MG,750MG	MDR TB
30	M	37	ELECTROLYTE IMBALANCE	Other	No	No		CAPREOMYCIN	MDR TB	750MG	IM	1200MG,750MG	MDR TB
23	M	50	LOSS OF APPETITE,LOSS OF WEIGHT	Other	No	No	COUNSELLING	PROTHRORAMIDE	MDR TB	500MG	ORAL	1200MG,750MG,500MG	MDR TB
23	M	50	BONE PAIN,BODY PAIN	Other	No	No	PARACETAMOL TAB	PYRAZINAMIDE	MDR TB	1200MG	ORAL	750MG	MDR TB
35	M	44	CHEST PAIN	Other	No	No	OMEPRAZOLE CAP,ANTACID,	CYCLOSERINE	MDR TB	500MG	ORAL	1200MG,750MG	MDR TB
30	F	31	WEAKNESS OF THE BODY,DIZZINESS	Recovered fully	No	No	IV-D/SALINE,ASTYMIN	CYCLOSERINE	MDR TB	500MG	ORAL	750MG,500MG	MDR TB
56	M	55	ELECTROLYTE IMBALANCE	Other	No	No	DIET MONITORING	CAPREOMYCIN	MDR TB	750MG	IM	750MG	MDR TB
56	M	55	SKIN RASHES	Other	No	No	LORATIDINE TAB,FUNBACT A CREAM	CYCLOSERINE	MDR TB	750MG	ORAL	750MG	MDR TB
56	M	55	PAINS IN THE LEGS	Recovered fully	No	No	PARACETAMOL TAB	PYRAZINAMIDE	MDR TB	1600MG	ORAL	750MG	MDR TB
30	F	37	VOMITTING, BODY WEAKNESS	Recovered fully	No	No	AVAMINE TAB	TAB CYCLOSERINE	MDR TB	500MG	ORAL	750MG	MDR TB
30	F	37	PAINS IN THE LOWER LIMB	Recovered fully	No	No	PARACETAMOL TAB,METHY/SALINE	PYRAZINAMIDE	MDR TB	1200MG	ORAL	750MG,500MG	MDR TB
30	F	37	ELECTROLYTE IMBALANCE	Other	No	No	SLOWK TAB 600MG	CAPREOMYCIN	MDR TB	750MG	IM	750MG	MDR TB
47	M	43	DYPSNIA	Recovered fully	No	No	ASSISTED BY OXYGEN FOR RESPIRATORY	CYCLOSERINE	MDR TB	500MG	ORAL	750,500MG	MDR
47	M	43	DIZZINESS	Recovered fully	No	No	IV FLUID,ASTYMIN	TAB CYCLOSERINE	MDR TB	500MG	ORAL	500MG,750MG	MDR TB
47	M	43	ABDOMINAL PAIN,GASTROENTERITIS	Recovered fully	No	No	IV DETROSE SALINE,FLAGLY	PYRAZINAMIDE	MDR TB	1200MG	ORAL	750MG	MDR TB
47	M	43	LOSS OF APPETITE	Other	No	No	COUNSELLING	PROTHRORAMIDE	MDR TB	500MG	ORAL	1200MG,750MG	MDR TB
47	M	43	MOOD SWING,SUICIDAL ATTEMPT	Other	No	No	PSYCHOLOGIST CALL FOR COUNSELLING	CYCLOSERINE	MDR TB	500MG	ORAL	750MG	MDR TB
34	M	59	PERIPHERAL NEUROPATHY	Other	No	No	INCREASED PYRIDOXINE	LEVOFLOXACIN	MDR TB	750MG	ORAL	750MG	MDR TB
34	M	59	SWOLLEN FEET	Other	No	No	FRUSEMIDE INJ.	CAPREOMYCIN	MDR TB	1G	IM	750MG	MDR TB
35	F	58	LOSS OF APPETITE	Other	No	No	ASTYMIN LIQUID	PROTHRORAMIDE	MDR TB	750MG	ORAL	750MG	MDR TB
33	M	60	CHEST PAIN	Other	No	No	PREDISOLONE TAB,ASTHMIN,FLAGYL	CYCLOSERINE	MDR TB	750MG	ORAL	750MG	MDR TB
38	F	30	MULTIPLE EPISODES OF VOMITING		No	No		CYCLOSERINE	MDR TB	500MG	ORAL	1200MG,750MG,500MG	MDR TB
57	M	40	VOMITTING	Other	No	No	METOCHLORAMINE	BADEQUINE	MDR TB	400MG	ORAL	750MG,200MG	MDR TB
43	M	49	BLURRED VISION	Other	No	No	YEAST TAB	PROTHRORAMIDE	MDR TB	750MG	ORAL	750MG	MDR TB
42	M	60	LOSS OF TASTE,LOSS OF APPETITE	Other	No	No	COUNSELLING,INCREASED BEVERAGES	PROTHRORAMIDE	MDR TB	1G	ORAL	1G,1600MG,750MG	MDR TB
43	M	49	TENDERNESS OF FEET	Other	No	No	TAB NEUROVITE FORTE	LEVOFLOXACIN	MDR TB	750MG	ORAL	750MG,1600MG	MDR TB
36	F	54	BONE PAIN,CHEST PAIN	Other	No	No	PARACETAMOL,ANTACID	PYRAZINAMIDE	MDR TB	1600MG	ORAL	750MG	MDR TB
42	M	60	ELECTROLYTE IMBALANCE	Other	No	No	SLOWK TAB 600MG	KANAMYCIN	MDR TB	1G	IM	1G,750MG	MDR TB
36	F	54	ELECTROLYTE IMBALANCE	Other	No	No	SLOWK TAB 600MG	KANAMYCIN	MDR TB	1G	IM	750MG	MDR
43	M	49	ELECTROLYTE IMBALANCE	Other	No	No	SLOWK TAB 600MG	KANAMYCIN	MDR TB	750MG	IM	750MG	MDR TB
44	M	71	ABDOMINAL DISCOMFORT , PASSAGE OF WATERY STOOL				ORT,BURSCOPAM,LOPERAMIDE	TDF/3TC/EFV	HIV INFECTION	300/300/600	ORAL	10MLS	TO BOOST BLOOD
58	M	58	GYNAECOMASTIA	Other	No	No	CHANGES TO ANOTHER ARV AZT =300MG/3TC=150MG/NVP=200MG	TDF=300MG/3TC=300MG/EFV=600MG	HIV INFECTION ARV	1 B.D	ORAL	DAILY	PROPHYLAXIS
57	M	64	SKIN EXFOLIATION	Other	No	No		CPTRIMOXAZOLE 960MG	PROPHYLAXIS	DAILY	ORAL
25	F	49	JOINT PAIN	Recovered fully	No	No			MDR-TB TREATMENT		ORAL	1000MG,750MG,500MG	MDR-TB TREATMENT,MDR-TB TREATMENT,MDR-TB TREATMENT
30	M	42	JOINT PAIN	Recovered fully	No	No	REASURE AND GIVE PYRIDOXINE 100MG DAILY FOR ONE MONTH		DS-TB TREATMENT		ORAL	ECF 6617A,ECF 6617A,ECF 6617A	DS-TB TREATMENT,DS-TB TREATMENT,DS-TB TREATMENT
50	M	75	WEAKNESS AND JOINT PAIN	Other	No	No			TREATMENT OF MDR-TB		ORAL	1000MG,750MG200MG	TREATMENT OF MDR-TB,TREATMENT OF MDR-TB,TREATMENT OF MDR-TB
21		45	ABDOMINAL DISCOMFORT, VOMITING	Other		No			AR-TB TREATMENT		ORAL	10MG
45	M	50	VOMITING	Other	No				TREATMENT OF DR-TB	750MG	ORAL	2DAILY	TREATMENT OF VOMITING
60	M	54	JOINT PAIN, VOMITING		Yes		REFERRED TO MEDICAL OFFICER		DR-TB TREATMENT	750MG	ORAL	(3,3,2) 10MG	MALARIA TREATMENT AND VOMITING
21	M		RASHES, PRURITIS	Other	No		REFER TO(MD) FLUCONAZOLE 200MG FOR 2WEEKS,LORATADINE 10MG FOR 3DAYS		MDR-TB TREATMENT		ORAL	750MG,30MG,1200MG	TREATMENT OF DR-TB,TREATMENT OF DR-TB,TREATMENT OF DR-TB
45	M	52	JOINT AND BACK PAIN, VOMITING	Other	No	No	REASSURE ADN REFER TO MEDICAL OFFICER		MDR-TB TREATMENT		ORAL	1000MG,500MG,750MG	TREATMENT OF DR-TB,TREATMENT OF DR-TB,TREATMENT OF DR-TB
48	F	48	GENERAL BODY PRURITIS	Other	No						ORAL	1000MG,500MG,750MG	TREATMENT OF DR-TB,TREATMENT OF DR-TB,TREATMENT OF DR-TB
50	M	43.2	JAUNDICE	Recovered fully	No	No	WITHOLDING OF ANTI TB	STOP TB ILI	ANTI TB		ORAL	400/300	ANTI TB,ANTI TB
35	F	57	ULCERATION OF LOWER LIPS		No		SUBSTITUTE ARVS	COMBIPAK	ARVS	200MG	ORAL	150MG,300MG	ARVS,ARVS
58	M		JAUNDICE, GENERALISED BODY WEAKNESS	Other	No	No	SUSPENDS ANTI TB	STOP TB KIT	ANTI TB		ORAL	960MG,300MG,400MG	RVD ,ANTI TB,ANTI TB
67	F	40.4	PRURITIS,JOINT PAIN	Other	No	No	SUSPEND ANTI TB	STOP TB KIT	ANTI TB		ORAL	400M,400M	ANTI TB
27	M	44.5	JAUNDICE	Other			SUSPENDING DRUGS		ANTI TB		ORAL	400M	ANTI TB,ANTI TB,ANTI TB
35	F	40	DIZZINESS	Recovered fully	Yes		SWITCHING OF DRUG AZT/3TC/NVP-TDF,EFV		ARVS		ORAL		ARV
22	F	65.5	PRURITIS,	Recovered with disability	No		LORATADIN 10MG,FULCONAZOLE 100	COTRIM	LOWER ABDOMINAL PAIN		ORAL		URTI
31	M	63	JOINT PAIN	Other	No	No	REASSURE PATIENT THAT REACTION WILL GO WITH TIME . TAKE PCM FOR PAIN	PYRAZINAMIDE	DR-TB		ORAL	50MG,4ML,250MG	DR-TB,DR-TB,DR-TB
37	F		HEARING LOSS	Other	No	No	REFER TO DR FURTHER EVALUATION	CAPREOMICYCIN	DR-TB		1.M	250MG,250MG,250MG	DR-TB
46	M	55	HEARING LOSS	Other			REFER PATIENT TO DR FOR FURTHER EVALUATION	CAPREOMYCIN	DR-TB		1.M		DR-TB
24	F	30	NAUSEA, VOMITING AND CONSTIPATION	Other	Yes		TAKE MEDICINE WITH FOOD PREPARE ORS AVOID FATIGUE	PROTHIONAMIDE	DR-TB		ORAL	500MG,500MG,100MG	DR-TB TREATMENT,DR-TB TREATMENT,DR-TB TREATMENT
29	M	74	G.I INTOLERANCE, VOMITING, STOMACH PAIN	Other	No		TAKE DRUGS WITH FOOD AND TAKE ORS AVOID FATTY FOOD		DR-TB		ORAL	750750300	DR-TB TREATMENT
19	F	45	RASH ON THE FACE, PAINS AT THE JOINTS	Other	No	No	AVOID HOT WATERY SCENTED SOAPS AND CREAMS,USE CALAMINE LOTION ,TAKE PARACETAMOL AND REASSURED	ISORNAZID	DS-TB		ORAL	3TABS	DS-TB
	F	28	SWOLLEN KNEE, JOINTS PAINS	Recovered fully		No	PARACETAMOL 1000MG TDS FOR 3DAYS,DICLOFENAC 50MG BD	PYRAZINAMIDE	MDR-TB	800MG	ORAL	750MG,500MG,500MG	MDR-TB DRUG,MDR-TB DRUG,MDR-TB DRUG
	F	30	SEVERE TINNITUS		No			KANAMYCIN	MDR-TB	750MG	1.M	1000MG,500MG,500MG	MDR-TB DRUG,MDR-TB DRUG,MDR-TB DRUG
52	M	31	LOSS OF WEIGHT ,SHORTNESS OF BREATHE,COUGH,FEELING OF FULLNESS	Other	No		GESTID SUSPENSION 10MLS TDS	PROTHIONAMIDE	DR-TB	500MG	ORAL	500MG,800MG,750MG	DR-TB
28	F	44	SLEEPLESSNESS, HEADACHE	Other	No			CYCLOSERINE	DR-TB	500MG	ORAL	1000MG,750MG,500MG	DR-TB
24	F	54	NAUSEA, VOMITING	Other	No	No	METOCLOPRAMIDE 10MG B.D FOR 3DAYS	PROTHIONAMIDE	DR-TB	750MG	ORAL	1000MG,1200MG,500MG	DR-TB
39	M	51	SKIN RASH, PRURITUS			No	FUNBACT A APPLYING TWICE DAILY	LEVOFLOXACIN	DR-TB	1000MG	ORAL	500MG,750MG1200MG	DR-TB
28	M	69	BOILS ON THE FACE	Other	No	No		PROTHIONAMIDE	DR-TB	750MG	ORAL	750M,1000MG1600MG	DR-TB
35	F	38	SWELLING OF FEET, COUGH	Recovered fully	No	No		PROPANDOL	PALPITATION	20MG	ORAL	600MG,500MG,500MG	DR-TB
16	F		TINNITUS	Other			TO GO FOR AUDIOMETRY	KANAMYCIN	DR-TB	500MG	1.M INJECTION	750MG,500MG,500MG	DR-TB
29	M	50	TINNITUS	Other		No	PATIENT REASSURED SINCE HE COMPLETED INJECTION RECENTLY	CAPREOMYCIN	DR-TB	800MG	1M	500MG,1200MG,100MG	DR-TB
41	M	62	STOMACH DISCOMFORT	Recovered fully	No	No	REASSURANCE	PROTHIONAMIDE	DR-TB	750MG	ORAL	1000MG,750MG,1600MG	DR-TB
	F		SORENESS AT THE TIP OF BOTH FINGERS , SORE ON THE VULVA IN FORM OF LEPROSY WOUND	Other	Yes		FLUCONAZOLE TBD 5DAYS					600MG,300MG,300MG	ARV
	F	88.6	INCREASE IN ABDOMINAL PAIN
28	F	57	RASH ON HER FACE	Other	No		CALAMINE LOTION AND PIRITON	ISONIAZID	TB-TREATMENT	750MG	ORALLY
42	M	58	JOINTS PAIN	Other	No		PARACETAMOL 100MG TABS 3DAYS AND REASSURED	PYRAZINAMIDE	TB-TREATMENT	400MG	ORALLY		TB,TB,TB
27	F	49	NAUSEA,VOMITING, STOMACH PAIN	Other	No		TAKE MEDICINE WITH FOOD ,TAKE ALOT OF FLUIDS AND SHE WAS REASSURED	PYRAZINAMIDE	TB-TREATMENT	400MG	ORAL
23	M	62	HEARING LOSS	Other	Yes	Yes	REFER TO DR FOR EVALUATION		TREATMENT OF M.DR-TB		INTRAMUSCULAR INJECTION	(200MG/150MG),300MG,300MG	RVD,RVD,RVD
23	M	52	INCOHERENT SPEECH		Yes		REFER TO DR FOR EVALUATION		TREATMENT OF M.D.R.T.B		ORAL	200MG,300MG,300MG	RVD,RVD,RVD
28	F		PRUIRITUS OCCURING THROUGH OUT THE BODY	Recovered fully	No		H.I.M HYDROCORTISONE 100MG STAT. HYCORTISONE	TDF/3TC/EFV	ART	300,300,600MG	ORAL	10MLS B.D,8MG B.D,1G B.D	TO STOP RASHES,TO STOP RASHES,HEADACHE
45	F	60	PRUIRITIS ON RIGHT HAND	Other	No		TAB CHLORPHENIRAMINE MALAETE 2MG	TDF/3TC/EFV	ART	300/300/600	ORAL	(600/300/1000----),960	TB, P CARINII PROPHYLAXIS
23	F	47	RASHES, PRURITIS	Recovered fully	No		DISCONTINUE COTRIMOXAZOLE,CHLORPHENIRAMINE MALEATE 2MG GDS	COTRIMOXAZOLE	PROPHYLAXIS AGAINST PNEUMOCYSTIS CARINII	960MG	ORAL	300/300/600	ART
13	F	30	NAUSEA, VOMITING	Recovered fully			METOCLOPRAMIDE	TAB PROTHIONAMIDE	MDRTB	250MG	OARAL	1G 250MG	MDRTB
32	M	33	DEPRESSION	Recovered fully	No		TAB AMITRYPTYLLINE	CYCLOSERINE	MDRTB	250MG	ORAL	1G,250MG	MDRTB
30	F	35	PERIPHERAL NEUROPATHY	Recovered fully	No		TAB NEUROVITE	TAB CYCLOSERINE	MDR TB	250MG	ORAL	1,250MG	MDRTB
45	M	55	DEPRESSION	Recovered fully	No		TAB AMITRYPTILLINE	CYCLOSERINE	MDRTB	250MG	ORAL	1, 250MG	MDRTB
36	F	41	PERIPHERAL NEUROPATHY	Recovered fully	No	No	TAB NEUROVITE	TAB CYCLOSERINE	MDRTB	250MG	ORAL	1G,250MG	MDRTB
36	F	41	NAUSEA, VOMITING	Recovered fully	No	No	TAB METHOCLOPRAMIDE	TAB PROTHIONAMIDE	MDRTB	250MG	ORAL	1G,250MG	MDRTB
55	F	32.5	PSYCHOSIS	Recovered fully	No	No	TAB SETRALLINE AND RISPERIDONE	CYCLOSERINE	MDR TB	250MG	ORAL	1G,250MG	MDRTB
45	M	55	ARTHRALGIA	Recovered fully		No	TAB IBUPROFEN	PYRAZINAMIDE	MDRTB	400MG	ORAL	1G,250MG	MDRTB
36	F	41	GASTRITIS		No		RELCER GEL AND OMEPRAZOLE	LEVOFLOXACIN	MDRTB	250MG	ORAL	1G,250MG	MDRTB
29	F	48	NAUSEA,VOMITING	Other	No		TAB METHOCLOPRAMIDE	TAB PROTHIONAMIDE	MDRTB	250MG	ORAL	1G,250MG	MDRTB
55	F	32.5	DEPRESSION	Other		No	TAB AMITRYPTILLINE	CYCLOSERINE	MDRTB	250MG	ORAL	1G,250MG	MDRTB
[truncated: 307 more rows]
